# Supplementary material
Source: PubMed Central journal article supplement (PMC3801003)
Supplement: 1216365110_sapp.pdf [file 1216365110_sapp.pdf]

## Defining Efficient Enzyme-Cofactor Pairs for Bioorthogonal Profiling of Protein Methylation

Kabirul Islam<sup>a</sup>, Yuling Chen<sup>b</sup>, Hong Wu<sup>c</sup>, Ian Bothwell<sup>a,d</sup>, Gil Blum<sup>a,d</sup>, Hong Zeng<sup>c</sup>, Aiping Dong<sup>c</sup>, Weihong Zheng<sup>a</sup>, Jinrong Min<sup>c,e</sup>, Haiteng Deng<sup>b</sup>, Minkui Luo<sup>a,1</sup>

### Author affiliation:

<sup>a</sup>Molecular Pharmacology and Chemistry Program, Memorial Sloan-Kettering Cancer Center, New York, NY 10065, USA; <sup>b</sup>School of Life Sciences, Tsinghua University, Beijing 100084, China; <sup>c</sup>Structural Genomics Consortium, University of Toronto, 101 College Street, Toronto, Ontario M5G 1L7, Canada; <sup>d</sup>Tri-Institutional Training Program in Chemical Biology, Memorial Sloan-Kettering Cancer Center, New York, NY 10065, USA; <sup>e</sup>Department of Physiology, University of Toronto, Toronto, Ontario, M5S 1A8, Canada.

### Corresponding author:

<sup>1</sup>Address correspondence to: Minkui Luo, Box 248, Memorial Sloan-Kettering Cancer Center, 1275 York Avenue, New York, NY 10065. Phone: 646-888-3066; E-mail: [luom@mskcc.org](mailto:luom@mskcc.org)

### Supplementary Materials

|                                        |      |
|----------------------------------------|------|
| 1. Supplementary Materials and Methods | S2   |
| 2. Supplementary Figures and Tables    | S9   |
| 3. References                          | S114 |

### 1. Supplementary Materials and Methods:

**General.** Chemicals were obtained from Aldrich Chemical or Acros Organics and used without further purification. HPLC grade solvents were purchased from Fisher Scientific and purified on a solvent drying system. Optima grade acetonitrile was degassed under vacuum and used for HPLC purification. Reactions were performed in cleaned round bottom flask, fitted with rubber septum. Thin layer chromatography (TLC) was performed using Whatman 250 micron aluminum backed UV F254 pre-coated silica gel flexible plates and visualized under UV light (254 nm) or by staining with potassium permanganate (KMnO<sub>4</sub>). Flash chromatography was performed on Merck 230–400 mesh silica gel 60 under positive pressure of nitrogen. Solvents were removed by rotary evaporation using a Büchi rotary evaporator, equipped with a dry ice-acetone condenser. Analytical HPLC was carried out on a Waters 600 Controller HPLC/2998 diode array detector using XBridge™ Prep C18 5µm 4.6×150mm reverse phase column with UV detection at 260 nm. Preparative HPLC purification was carried out on the same HPLC using XBridge™ Prep C18 5µm OBD™ 19×150mm reverse phase column with UV detection at 260 nm. Concentration and subsequent lyophilization of aqueous samples were performed using Savant Sc210A SpeedVac Concentrator (Thermo and Flexi-Dry™ µP Freeze-Dryer (FTS™ System), respectively. Proton nuclear magnetic resonance spectra (<sup>1</sup>H-NMR) were recorded on Bruker Avance III 500 MHz instrument at 24 °C. Chemical shifts for <sup>1</sup>H-NMR spectra are reported as δ in units of parts per million (ppm) relative to tetramethylsilane (δ 0.0) or using residual solvent signals: chloroform-*d* (δ 7.26, singlet) and deuterium oxide-*d*<sub>2</sub> (δ 4.80, singlet). Coupling constants are expressed in Hz. Mass spectra were collected at the MSKCC Analytical Core Facility on a PE SCIEX API 100 or Waters Acuity SQD LC-MS with electron spray ionization (ESI) probe.

**Synthesis and characterization of SAM analogues.** SAM analogues **2**, **3**, **5** and **6** were synthesized as described previously (S1-S4). Compounds **4** and **7** were synthesized as the following: into a solution of *S*-adenosyl-*L*-homocystine (15 mg, 0.039 mM) in formic and acetic acids (1:1, 1 mL) was added (*E*)-1-bromopent-2-ene (288 mg, 1.95 mM) or (*E*)-7-bromohept-5-en-1-yne (335 mg, 1.95 mM) and AgClO<sub>4</sub> (8 mg, 0.039 mM) and stirred at ambient temperature (22 °C). Reaction progress was monitored by analytical reversed-phase HPLC (XBridge™ C18 5µm 4.6×150mm) at 260nm. After 4 hrs, an additional batch of AgClO<sub>4</sub> and the bromides were

added to drive the reactions to completion. The reactions were then quenched by distilled water containing 0.01% TFA (v/v). The aqueous phase was washed three times with diethyl ether (3×15 mL) and then passed through Nalgene 0.2 μM syringe filter. Compound **4** and **7** were purified with preparative reversed-phase HPLC (XBridge™ Prep C18 5μm OBD™ 19×150mm). Diastereomeric mixture of the SAM analogues was collected, concentrated and then lyophilized overnight. The resultant compounds were re-dissolved in water containing 0.01% TFA (v/v) and stored at –80 °C before use. The concentrations of SAM analogues were determined by the UV absorption with  $\epsilon_{260}=15400 \text{ L mol}^{-1} \text{ cm}^{-1}$ . Compounds **4** and **7** were isolated in ~55% and ~40% yield, respectively. Analytical and spectral data are described below.

**SAM analogue 4:**  $^1\text{H-NMR}$  (600 MHz,  $\text{D}_2\text{O}$ ):  $\delta$  8.35 (s, 1H), 8.34 (s, 0.5H), 8.33 (s, 0.5H), 6.08-6.03 (m, 1.5H), 5.94-5.89 (m, 0.5H), 5.37 (q, 0.5H,  $J=7.56$  Hz), 5.25 (q, 0.5H,  $J=7.56$  Hz), 4.55 (t, 0.5H,  $J=6.18$  Hz), 4.51 (t, 0.5H,  $J=5.82$  Hz), 4.43-4.40 (m, 1H), 4.0 (d, 1H,  $J=7.56$  Hz), 3.96 (d, 1H,  $J=7.56$  Hz), 3.85-3.80 (m, 1H), 3.77-3.65 (m, 2H), 3.44-3.38 (m, 1H), 3.36-3.28 (m, 1H), 2.02 (q, 1H,  $J=7.02$  Hz), 1.93 (q, 1H,  $J=6.6$  Hz), 0.86 (t, 1.5H,  $J=7.44$  Hz), 0.78 (t, 1.5H,  $J=7.44$  Hz).  $^{13}\text{C-NMR}$  (150 MHz,  $\text{D}_2\text{O}$ ):  $\delta$  171.20, 171.14, 150.02, 148.70, 148.66, 147.94, 147.92, 144.54, 144.48, 143.45, 143.41, 117.22, 115.28, 113.35, 112.11, 111.81, 90.02, 89.99, 78.61, 78.46, 73.0, 72.8, 72.6, 51.81, 51.76, 42.93, 42.23, 40.76, 40.40, 35.20, 34.93, 25.23, 25.15, 25.12, 25.03, 20.3, 11.96, 11.83. Total 38 peaks for two diastereomers. **ESI-MS** ( $m/z$ ): 453.2[M]<sup>+</sup>, 351.9 [5'-((E)-pent-2-enyl)thio-5'-deoxyadenosine+H]<sup>+</sup>, 250.2 [5'-deoxyadenosine]<sup>+</sup>, 135.8 [adenosine+H]<sup>+</sup>. **HRMS**: Calculated for  $\text{C}_{19}\text{H}_{29}\text{N}_6\text{O}_5\text{S}$ : 453.1920; obtained: 453.1913.

**SAM analogue 7:**  $^1\text{H-NMR}$  (600 MHz,  $\text{D}_2\text{O}$ ):  $\delta$  8.37 (s, 0.5H), 8.35 (s, 1H), 8.34 (s, 0.5H), 6.06 (dd, 1H,  $J=3.18, 8.22$  Hz), 6.04-6.0 (m, 0.5H), 5.85-5.81 (m, 0.5H), 5.49 (q, 0.5H,  $J=7.56$  Hz), 5.32 (q, 0.5H,  $J=7.56$  Hz), 4.58 (t, 0.5H,  $J=6.54$  Hz), 4.55 (t, 0.5H,  $J=6.12$  Hz), 4.44-4.41 (m, 1H), 4.03 (d, 1H,  $J=7.62$  Hz), 3.99 (d, 1H,  $J=7.92$  Hz), 3.81-3.64 (m, 3H), 3.46-3.39 (m, 1H), 3.35-3.30 (m, 1H), 2.25-2.21 (m, 5H), 2.12-2.09 (m, 2H).  $^{13}\text{C-NMR}$  (150 MHz,  $\text{D}_2\text{O}$ ):  $\delta$  171.85, 171.75, 150.32, 150.24, 147.97, 147.95, 145.01, 144.84, 144.34, 144.26, 143.47, 143.38, 117.23, 115.29, 115.0, 114.67, 113.36, 90.08, 90.06, 84.93, 84.77, 78.69, 78.34, 72.99, 72.94, 72.66, 70.06, 70.04, 52.32, 52.29, 42.10, 41.34, 40.64, 40.24, 35.23, 35.02, 30.65, 30.59, 25.30, 25.12, 16.94, 16.76. Total 42 peaks for two diastereomers. **ESI-MS** ( $m/z$ ): 477.2[M]<sup>+</sup>, **HRMS**: Calculated for  $\text{C}_{21}\text{H}_{29}\text{N}_6\text{O}_5\text{S}$ : 477.1920; obtained: 477.1903.

**Synthesis of H3K9 peptide.** Histone H3 peptide ARTKQTARKSTGGKAPRKQLA (amino acids 1-21) for single-point and steady-state kinetic measurements was obtained from Proteomics Resource Center of the Rockefeller University. TKQTARK<sub>9</sub><sup>(allyl)</sup>STGG peptide used for crystallographic experiments was synthesized as described before (S5).

**Protein expression and *in vitro* methyltransferase assay.** Native EuHMT1/2 and their variants were expressed and purified as described previously (3, 6). For the initial screening, reactions were initialized by adding 1.0  $\mu$ M enzymes (EuHMT1/2 and their variants) into 10  $\mu$ M histone H3 peptide and 50  $\mu$ M of cofactors (1–7) in 50 mM Tris-HCl buffer (pH=8.0) with the final volume of 20- $\mu$ L. The reaction mixture was incubated at 25°C for 30 min. The products were then subject to MALDI mass analysis as described before (3, 6).

**Autoradiography assay for histone and non-histone substrates of EuHMT1/2.** A 20- $\mu$ L reaction was carried out at ambient temperature (22 °C) for overnight in the buffer containing 50 mM Tris-HCl pH 8.0 with 2.25  $\mu$ M of [methyl-<sup>3</sup>H]-S-adenosylmethionine and 2  $\mu$ M of *E. Coli*-expressed EuHMT1 or EuHMT2 (the SET domain constructs) (3, 6) in the presence of 2-4  $\mu$ g of various substrates. After the reactions, the samples were solved by SDS-PAGE and subsequently analyzed by autoradiography. The non-histone human recombinant substrates used in the current study were obtained either as generous gifts (C-terminal domain of POLR2A from Dr. Martin Walsh and PARP1 from Dr. Hening Lin) or purchased from Origene Technologies Inc (ACLY, PRMT5, IDH1) and Abnova (TARS, PKIM1/2, Nucleolin, HAT1, EEF1A1, HNRPK).

**General method to measure steady-state kinetics.** The reactions for steady-state kinetics were initialized by adding 1.0  $\mu$ M enzymes (EuHMT1/2 and their variants) into 25  $\mu$ M histone H3 peptide and various concentrations of cofactors (1–7) in 50 mM Tris-HCl buffer (pH=8.0) at 25°C (the final volume of 10- $\mu$ L). MALDI matrix solution of 1  $\mu$ L (10 mg/mL of cyano-4-hydroxycinnamic acid in 1:1 acetonitrile and water with 0.1% TFA) was spotted on a MALDI plate prior to each measurement. At each time interval, 1  $\mu$ L of the assayed reactions was applied to the MALDI plate on top of the previously-spotted matrix solution. An additional 1.5  $\mu$ L acetonitrile containing 0.1% TFA was added to each sample to ensure the complete quenching of the reactions. The resultant samples were dried at ambient temperature (22 °C) and quantified by

MALDI-TOF mass spectrometry as described before (3, 6). See below for data processing and calculation of kinetic parameters.

**Cloning, expression and purification of the EuHMT1 Y1211A mutant for crystallization.**

The expression construct of EuHMT1 methyltransferase domain was generated according to the protocol described previously (S7). The Y1211A mutation was introduced by QuikChange Site-directed mutagenesis kit (Agilent technologies). The EuHMT1 variant was overexpressed in *E. coli* BL21 (DE3) pRAREV2R induced by 1 mM isopropyl-1-thio-D-galactopyranoside (IPTG) at 15°C for overnight. The cells were harvested and then resuspended in lysis buffer containing 50mM Tris-HCl (pH=8.0), 0.25 M NaCl, 2 mM  $\beta$ -mercaptoethanol, 5% glycerol, 0.1% Igepal, and protease inhibitor (1 mM phenylmethyl sulfonyl fluoride, PMSF). The cells were lysed by passing through a microfluidizer (Microfluidics Corp.) at 20,000 psi (Microfluidics Corp.). The cleared lysate was loaded onto a 5 ml HiTrap Chelating column (GE Healthcare), charged with Ni<sup>2+</sup> on an AKTA FPLC system (GE Healthcare). The column was washed with 10 CV of 20 mM Tris-HCl (pH=8.0) containing 250 mM NaCl and 50 mM imidazole, 5% glycerol. The desired protein was eluted with the elution buffer containing 20 mM Tris-HCl (pH=8.0), 250 mM NaCl, 250 mM imidazole, and 5% glycerol. The eluted protein was loaded on a Superdex200 column (GE Healthcare), equilibrated with 20 mM Tris-HCl buffer, (pH=8.0) and 150 mM NaCl and was further purified to homogeneity by a Q-type ion-exchange chromatography.

**Crystallization.** Purified EuHMT1 Y1211A protein (10 mg/mL) was complexed with *S*-adenosyl-*L*-homocysteine (SAH) and H3K9 N<sup>ε</sup>-allyl peptide at 1:5:5 molar ratio of protein:SAH:peptide and crystallized using hanging drop vapor diffusion method at 20 °C by mixing 1  $\mu$ l of the protein solution with 1  $\mu$ l of the reservoir solution containing 20% PEG 4,000, 10% isopropanol and 0.1 M HEPES (pH=7.5).

**Data collection and structure determination.** X-ray diffraction data of the complex of the EHMT1 Y1211A mutant with SAH and the H3K9 allyl peptide were collected at 100K at beamline23ID of Advanced Photon Source (APS), Argonne National Laboratory. Data were processed using the HKL-2000 suite (S8). The structure was solved by molecular replacement using MOLREP (S9). The crystal structure of human EHMT1 (PDB code 2IGQ) was used as the search model (S7). ARP/wARP was used for automatic model building (S10). REFMAC was

used for structure refinement (S11). Graphics program COOT was used for model building and visualization (S12). Crystal diffraction data and refinement statistics for the structure are given in Table S1.

**Transient transfection, cell lysis and Western blot.** Human embryonic kidney (HEK) 293T cells were grown, transfected and lysed for Western blot as well as for target labeling and mass spectroscopic analysis. Details were similar to what were described before (S6).

**In-gel labeling of proteome-wide substrates of EuHMT1/2.** HEK293T cell lysates (40  $\mu$ g) of mock-, Y1211A-, and Y1154A-transfected were incubated with 50  $\mu$ M of Hey-SAM for 1 h at ambient temperature (22  $^{\circ}$ C) with the final volume of 20  $\mu$ L. After quenching the enzymatic reactions, the cellular lysates were passed through a detergent removal spin column and eluted with the Tris buffer (pH=8.0) containing 50 mM Tris-HCl, 10% glycerol, 2 mM TCEP, and 1 $\times$ Roche protease inhibitor (S6). The resultant samples were then subject to CuAAC with 100  $\mu$ M Az-Rho, 100  $\mu$ M TBTA, 1 mM CuSO<sub>4</sub> and 2.5 mM TCEP for 1 hr at dark. After the CuAAC ligation, the cellular lysates were washed and subject to in-gel fluorescence as described before (S6).

**Pull-down and mass spectroscopic analysis of proteome-wide substrates of EuHMT1/2.** HEK293T cell lysates of 10 mg from mock-, Y1211A-, and Y1154A-transfected cells were incubated with 50  $\mu$ M Hey-SAM **6** in a total 5 mL volume for 2 hrs at ambient temperature (22  $^{\circ}$ C). Methanol of 25 mL was then added into each sample and kept at  $-80^{\circ}$ C overnight. The resultant samples were centrifuged for 30 min at 4,000 rpm. Supernatant was removed and protein pellets were washed with 15 mL cold methanol. The pellets were air-dried for 25 min and re-dissolved with 4.5 mL SDS buffer containing 50 mM triethanolamine (pH=7.4), 150 mM NaCl, 4% SDS and 1 $\times$ Roche protease inhibitor. Into the samples were added 0.5 mL click cocktail (100  $\mu$ L of 5 mM azido-diazo-biotin in DMSO, 100  $\mu$ L of 100 mM TCEP, 250  $\mu$ L of 2 mM of TBTA in DMSO, and 100  $\mu$ L of 50 mM of CuSO<sub>4</sub>). The click reaction was performed for 1.5 hrs and the samples were mixed with 25 mL methanol and kept at  $-80^{\circ}$ C overnight. The samples were re-dissolved in 1 mL SDS buffer (50 mM triethanolamine, pH=7.4, 150 mM NaCl, 4% SDS, 1 $\times$ Roche protease inhibitor and 10 mM EDTA), followed by the addition of 2 mL of the dilution buffer (50 mM triethanolamine, pH=7.4, 150 mM NaCl, 1% Brij97, and 1 $\times$ Roche protease inhibitor). Streptavidin bead of 100  $\mu$ L in the dilution buffer was mixed with the protein

samples and rotated end-over-end at ambient temperature (22 °C) for 1 h. The resultant mixture was further diluted with 10 mL PBS buffer supplemented with 0.2% SDS and centrifuged at 2,000 rpm for 2 min. The streptavidin beads were washed with the buffer containing 10 mL PBS and 250 mM ammonium bicarbonate buffer (ABC) and then transferred into 1.5 mL micro centrifuge tubes. The resultant streptavidin beads were treated with the freshly-prepared reduction buffer (500  $\mu$ L of 8 M urea, 25  $\mu$ L of 200 mM TCEP, and 25  $\mu$ L of 400 mM iodoacetamide) for 40 min in dark, followed by the washing with 250 mM ammonium bicarbonate buffer. The bead-immobilized proteins were discharged twice with 250  $\mu$ L of the elution buffer (25 mM  $\text{Na}_2\text{S}_2\text{O}_4$ , 1% SDS and 250 mM ABC) for 30 min. Eluted proteins were subject to mass spectroscopic analysis as described before (S6).

**Tandem Mass Tagging (TMT) for quantitative MS analysis of proteome-wide substrates of EuHMT1/2.** For quantitative comparison of BPPM-revealed target proteins, samples were prepared as described above. Briefly, Hey-SAM incubated HEK293T cell lysates (either mock-, Y1211A-, or Y1154A-transfected) were precipitated using methanol. Precipitated proteins were redissolved in SDS buffer and subjected to ‘click’ chemistry with azido-diazo-biotin. The ligated proteins were further precipitated using methanol and subsequently enriched with streptavidin beads and eluted with 25 mM  $\text{Na}_2\text{S}_2\text{O}_4$  as detailed in the preceding section. Eluted proteins were first separated on 1D SDS PAGE. The gel bands of corresponding molecular weights were excised, reduced with 10 mM of DTT and alkylated with 55 mM iodoacetamide. In gel digestion was then carried out with the sequence grade modified trypsin (Promega, Fitchburg, WI) in 50 mM ammonium bicarbonate at 37 °C overnight. The peptides were extracted twice with 1% trifluoroacetic acid in 50% acetonitrile aqueous solution for 30 min. The extractions were centrifuged in a Speedvac to reduce the volume. Peptides from different samples were labeled with TMT reagents (Thermo, Pierce Biotechnology, Rockford, IL) according to the manufacture’s instruction. Briefly, the TMT label reagents were dissolved by anhydrous acetonitrile, carefully added to each digestion products (126, 128 and 131 mass tagging were used for control vector-, EuHMT1- and 2-transfected samples, respectively). The reaction mixtures were incubated for 1 h at ambient temperature (22 °C) and then quenched by hydroxylamine. The TMT-labeled peptides were desalted using the stage tips.

For the subsequent LC-MS/MS analysis, the TMT-labeled peptides were separated by a 65 min gradient elution at a flow rate 0.250  $\mu$ L/min with the EASY-nLCII™ integrated nano-HPLC

system (Proxeon, Denmark), which is directly interfaced with the Thermo LTQ-Orbitrap mass spectrometer. The analytical column was a home-made fused silica capillary column (75  $\mu\text{m}$  ID, 150 mm length; Upchurch, Oak Harbor, WA) packed with C-18 resin (300 A, 5  $\mu\text{m}$ , Varian, Lexington, MA). Mobile phase A consisted of 0.1% formic acid, and mobile phase B consisted of 100% acetonitrile and 0.1% formic acid. The LTQ-Orbitrap mass spectrometer was operated in the data-dependent acquisition mode using the Xcalibur 2.0.7 software and there is a single full-scan mass spectrum in the Orbitrap QE (400-1800  $m/z$ , 30,000 resolution) followed by 10 MS/MS scans in the quadrupole collision cell using the higher energy collision dissociation (HCD). The MS/MS spectra from each LC-MS/MS run were searched against the selected database using an in-house Mascot or Proteome Discovery (Version 1.3) searching algorithm.



## 2. Supplementary Figures and Tables:

**Figure S1.** Schematic description of BPPM technology. Functional cofactor-mutant pairs are evolved by engineering the SAM-binding site of a PMT to accommodate bulky SAM analogues. Efficient cofactor-mutant pairs can be applied for substrate labeling in native cellular milieu. The labeled substrates are enriched and subject to MS-based proteomic and functional analysis. Analogues 2–7 of SAM 1 were systemically evaluated in the current work.

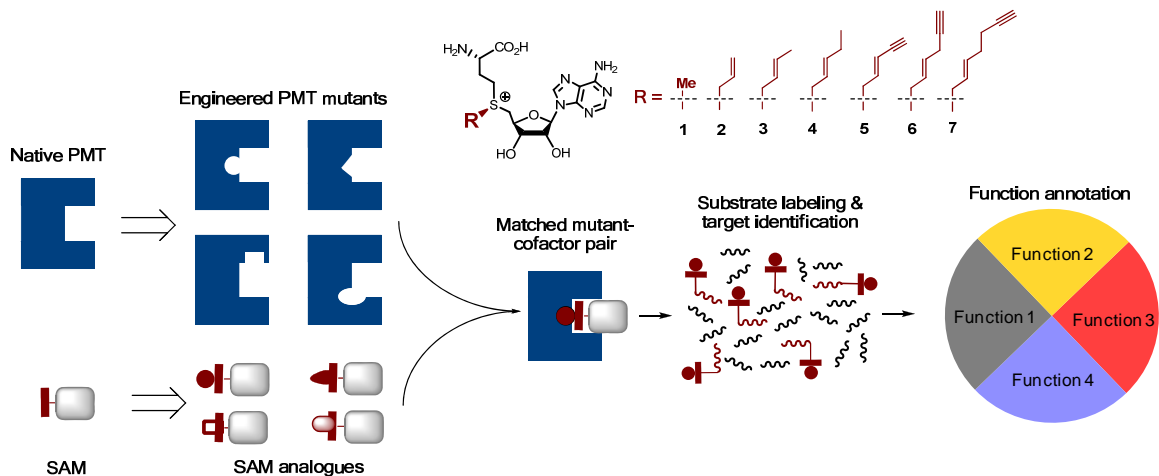

**Figure S2.** Heat-map representation of the extent of modification (%) of H3K9 peptide by SAM or SAM analogues with native and mutated EuHMT2. The sites of mutation are highlighted for EuHMT2 (PDB code 2O8J).

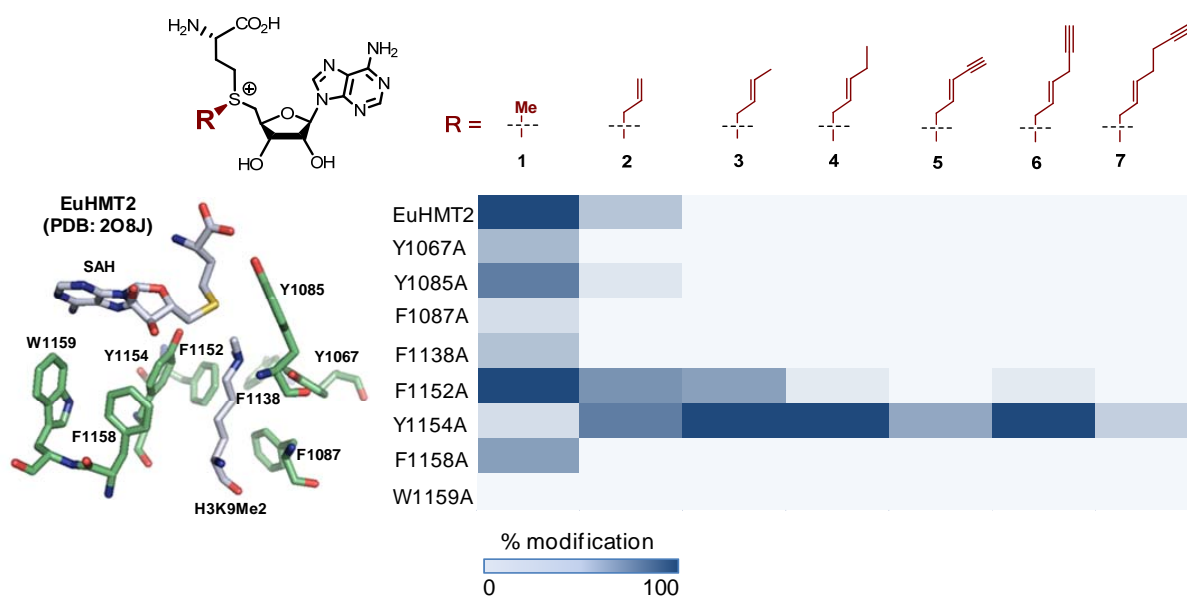

**Figure S3.** MALDI-based quantification of the activities of EuHMT1 and its mutants on SAM analogue cofactors. Only positive hits were shown here. In the set of screening, 1  $\mu$ M enzyme (native/mutants) was added into the reaction mixture containing 10  $\mu$ M of H3K9 peptide and 50  $\mu$ M of SAM/SAM analogues for 30 min at ambient temperature (22 °C). The samples were then subject to MALDI-MS analysis as described above.

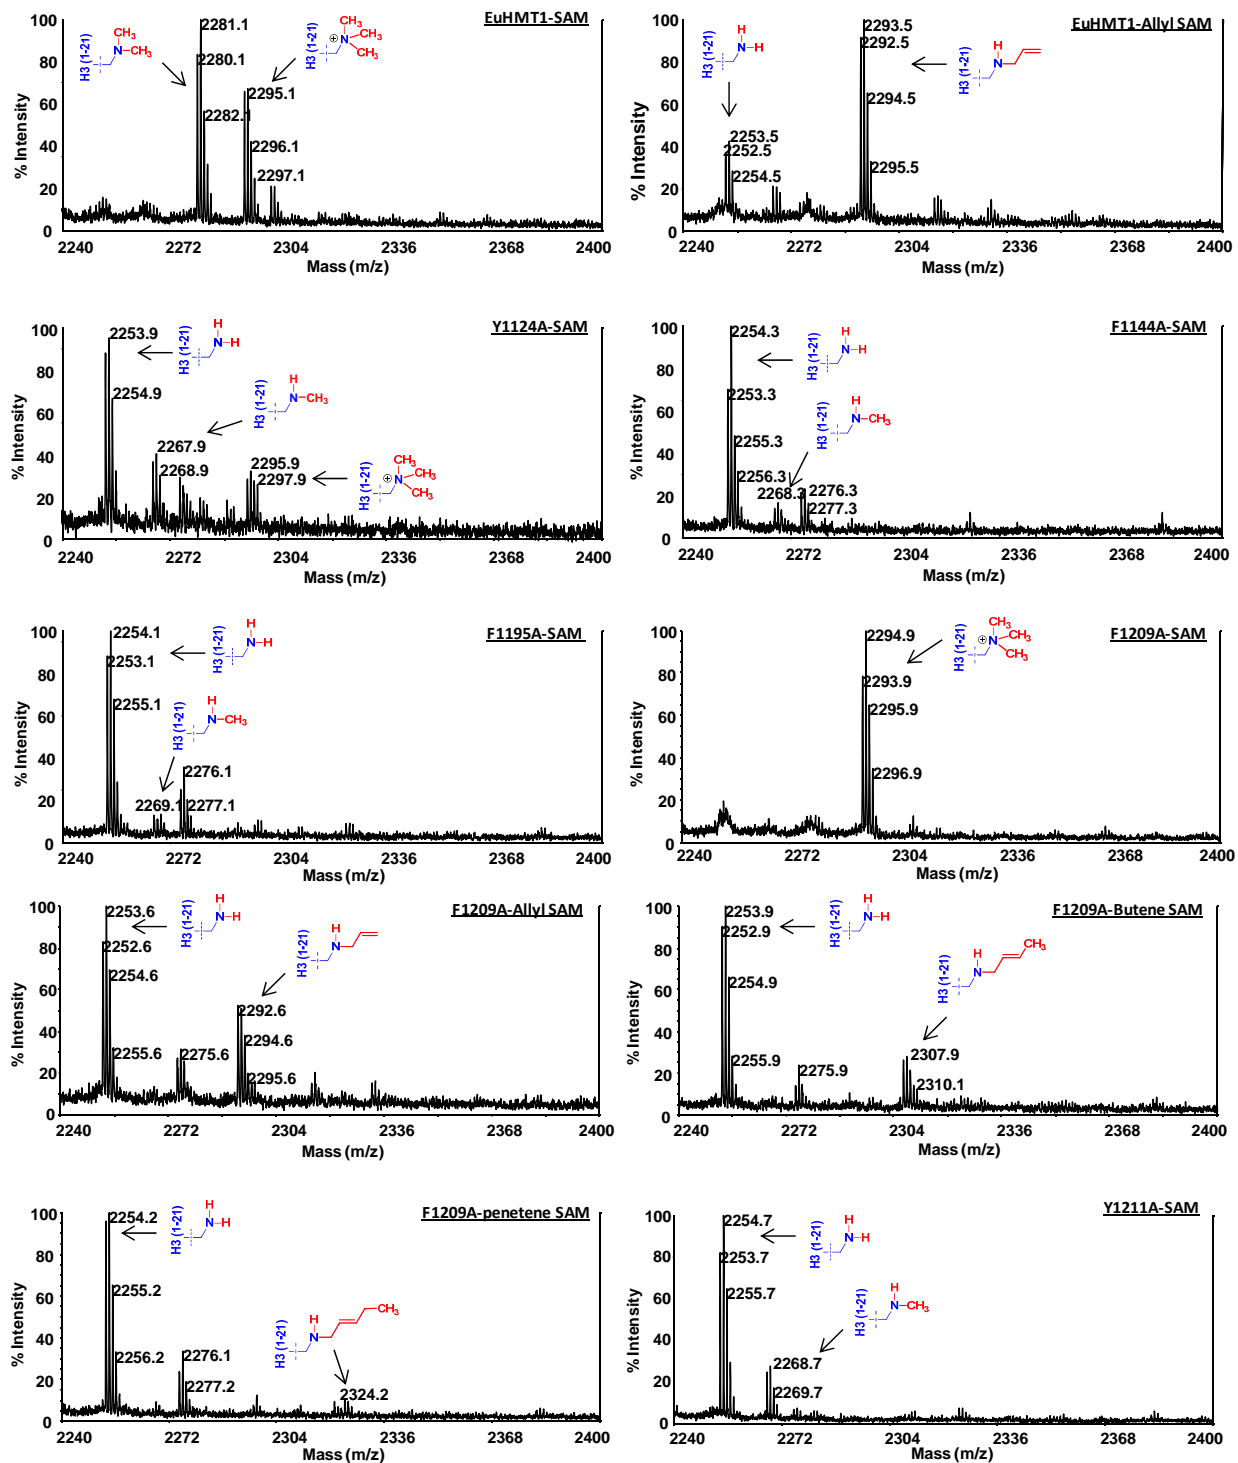

Figure S3 continued.

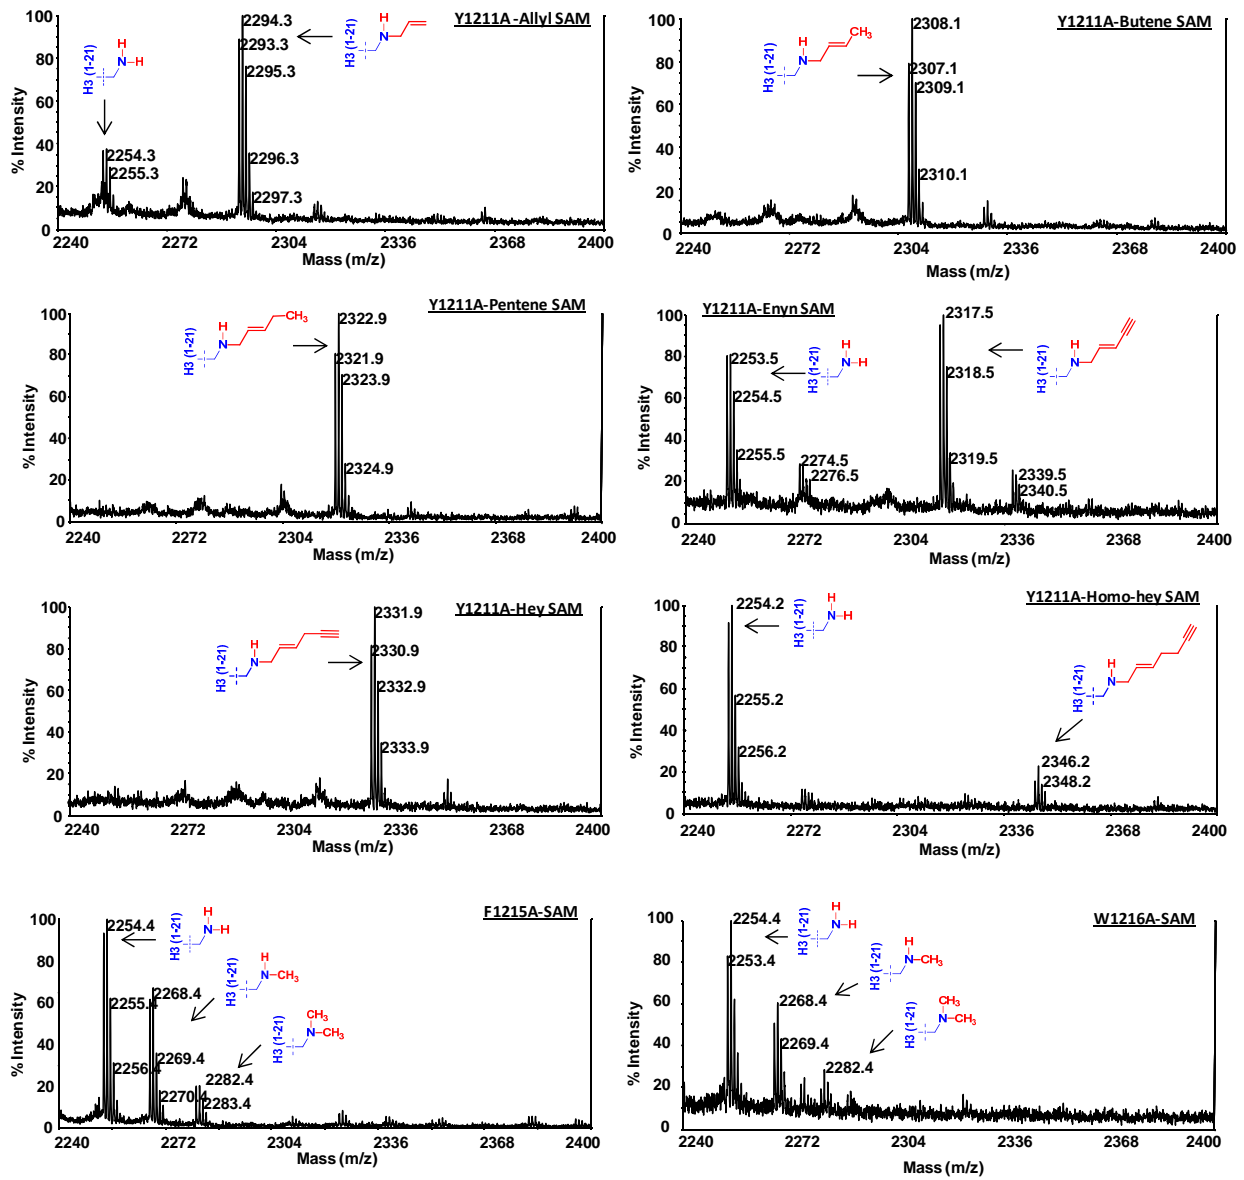

**Figure S4.** MALDI-based quantification of the activities of EuHMT2 and its mutants on SAM analogue cofactors 1–7. Only positive hits were shown here. In the set of screening, 1  $\mu$ M enzyme (native/mutants) was added into the reaction mixture containing 10  $\mu$ M of H3K9 peptide and 50  $\mu$ M of SAM/SAM analogues for 30 min at ambient temperature (22 °C). The samples were then subject to MALDI-MS analysis as described above.

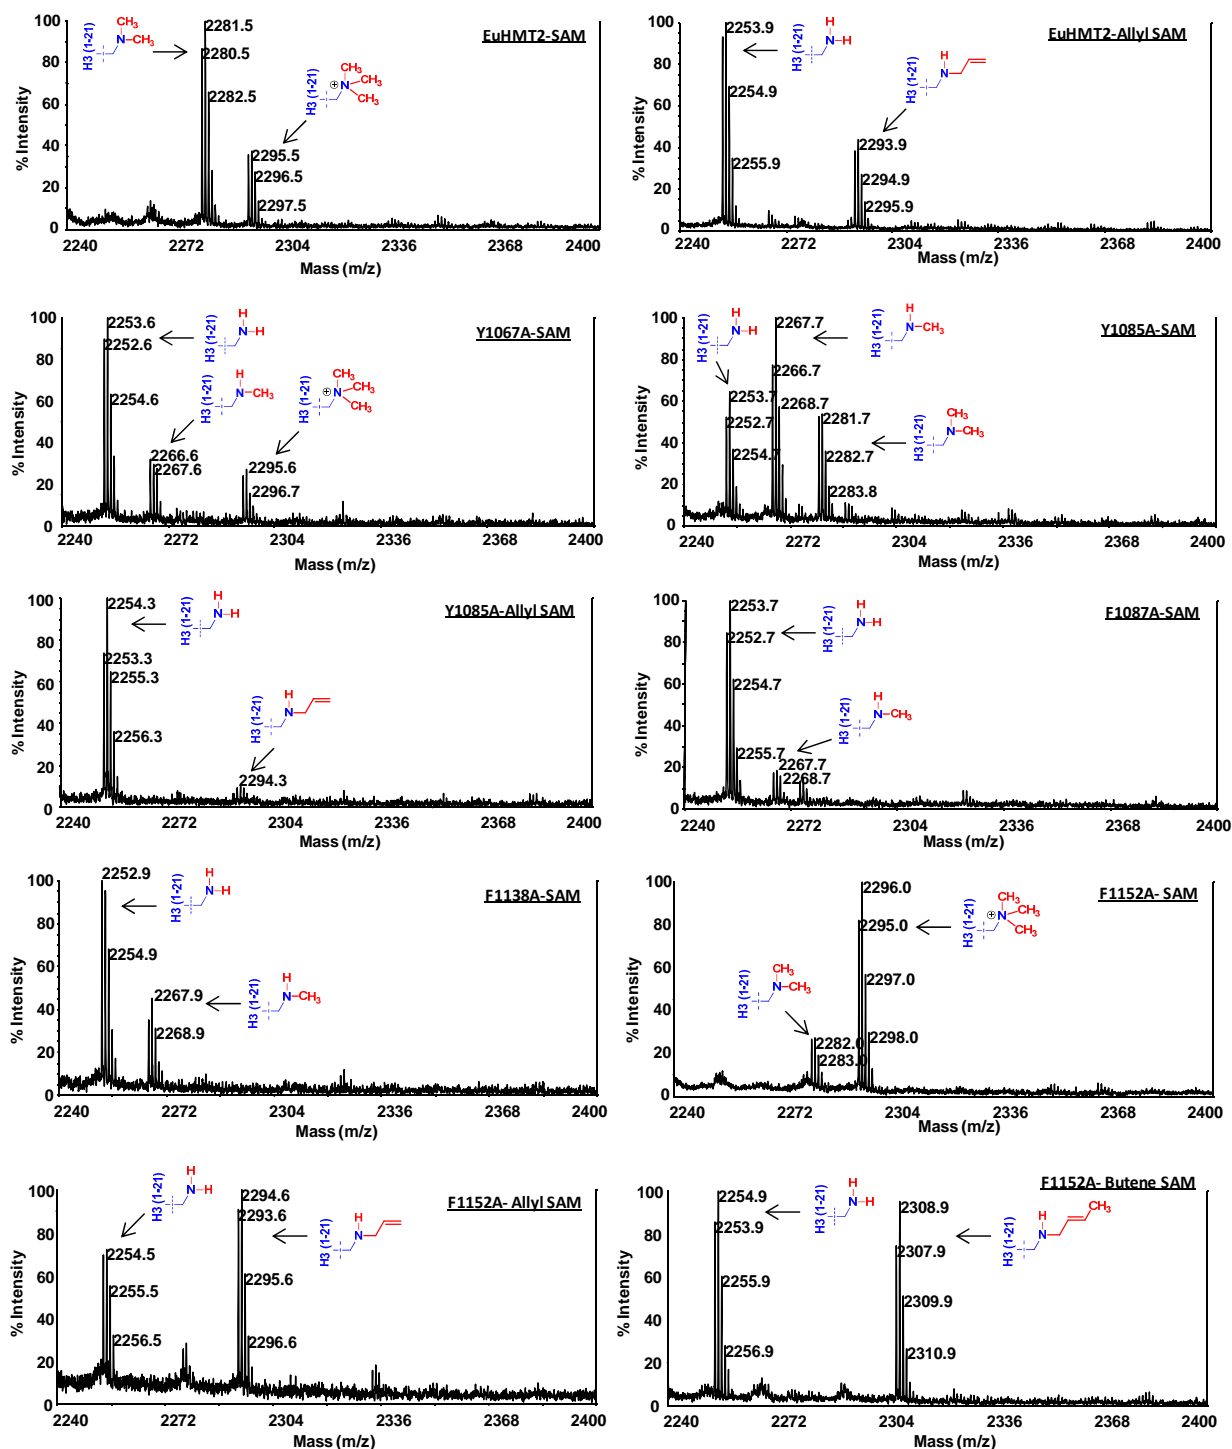

Figure S4 continued.

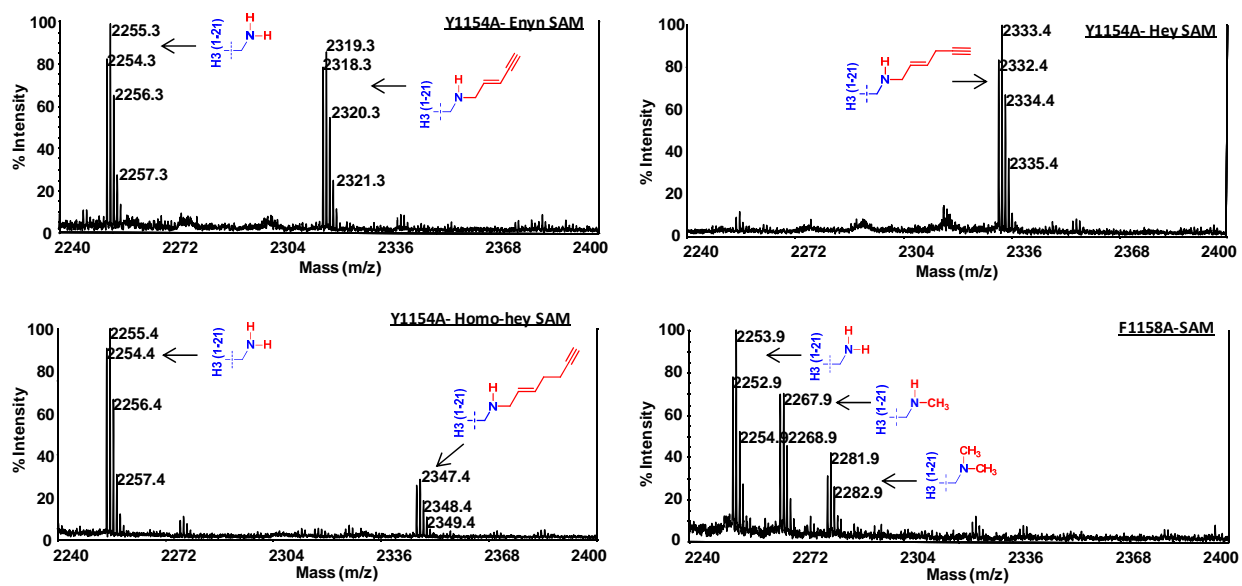

**Figure S5.** Overlaid structures of representative SET-domain containing PMTs EuHMT1, EuHMT2, Dim5, and SETMAR (PDB codes: 2RFI, 2O8J, 1PEG and 3BO5 respectively).

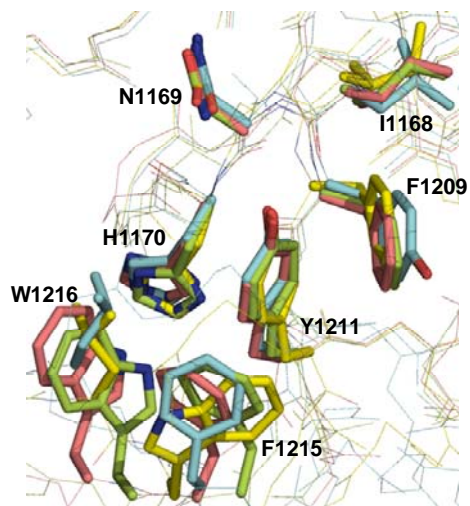

**Figure S6.** Superimposed structure of native EuHMT1 (PDB: 2RF1) and its Y1211A mutant (PDB: 4H4H).

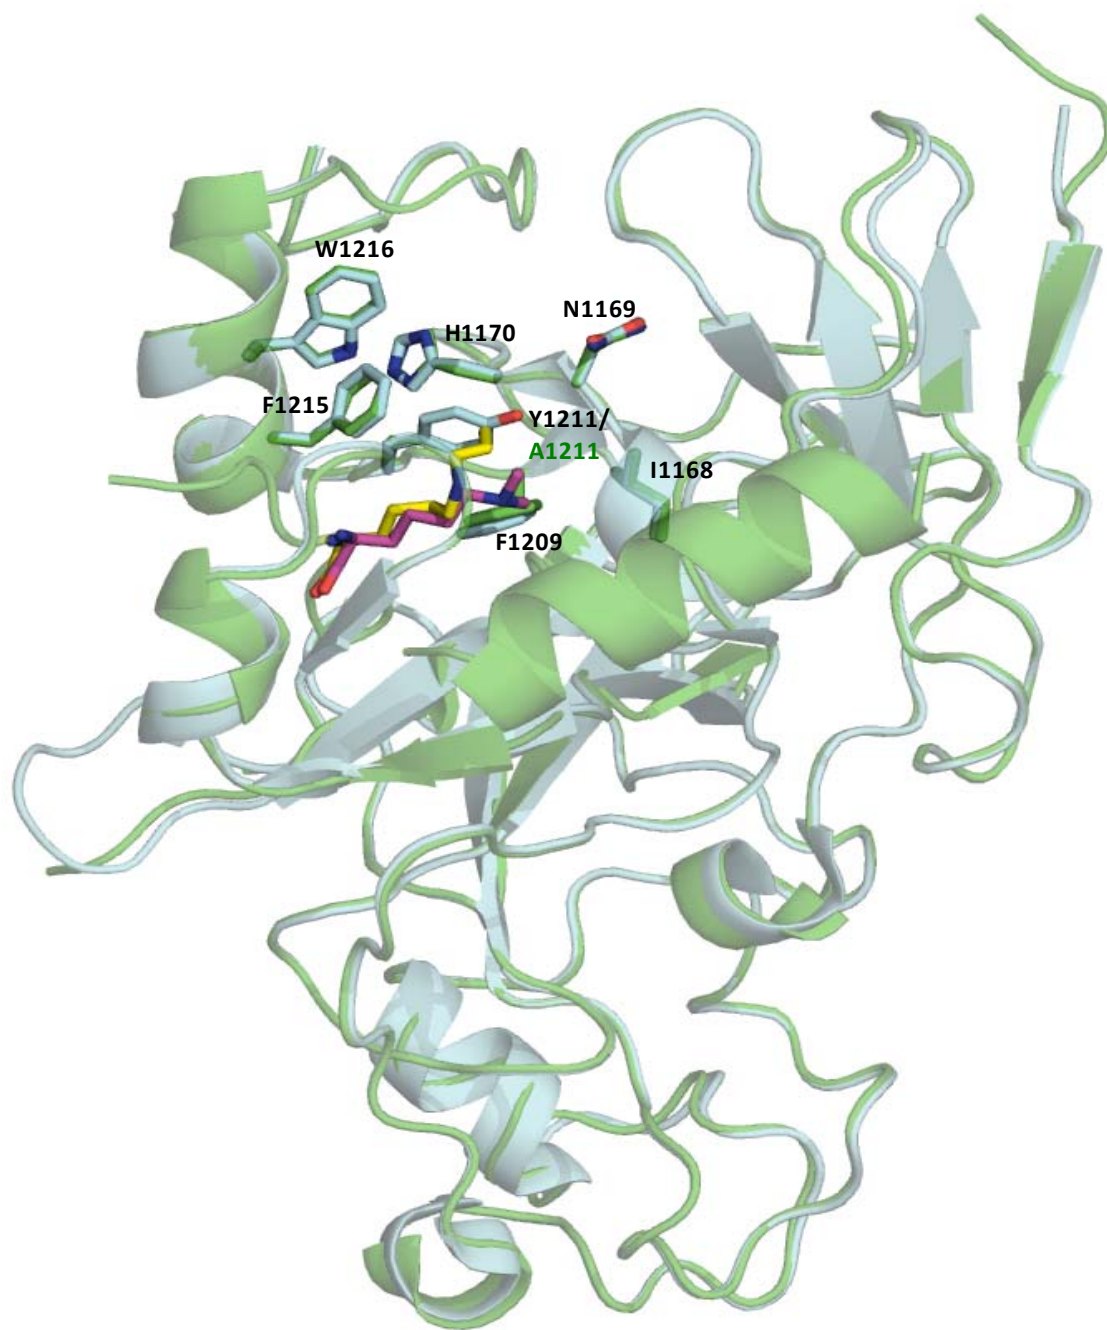



**Figure S7.** Structural characterization of EuHMT1-Y1211A mutant in complex with SAH and the allylated histone H3K9 peptide. Superimposed interactions of EuHMT1 and its Y1211A mutant with the H3K9 and H3K9(allyl) peptide, respectively.

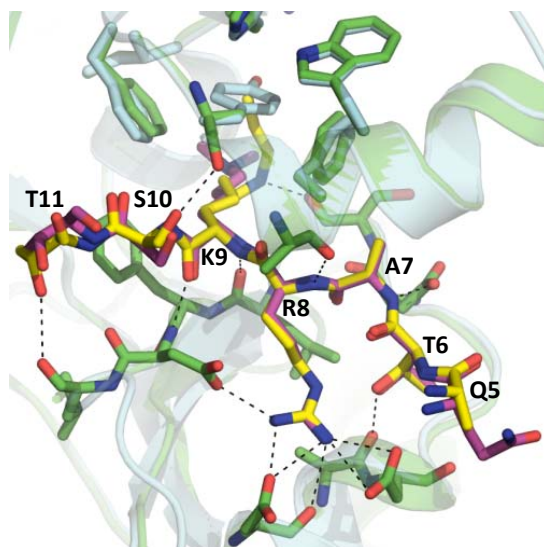

**Figure S8.** Kinetic analysis of active enzyme-cofactor pairs. Here a fixed concentration of H3K9 peptide (25  $\mu\text{M}$ ) was used as substrate in these experiments. In contrast, the amounts of the enzymes, cofactors and incubation time varied case by case as will be detailed below.  $\% \text{Modification} \cdot \text{time}^{-1}$  of the time-dependent experiments (slopes in the left panel) was then converted into Rate ( $\text{min}^{-1}$ ) by multiplying a factor of 0.25 (conversion of  $\% \text{Modification}$  to  $\mu\text{M}$  of modified peptide) and then dividing by the concentrations of enzymes. These rates were plotted against the concentrations of cofactors (right panel) with apparent  $k_{\text{cat}}$  and  $K_{\text{m}}$  calculated according to a standard Michaelis-Menten equation (right panel). Here, 0.5  $\mu\text{M}$  and 1  $\mu\text{M}$  of native EuHMT1 were used with SAM 1 (S13) and allyl-SAM 2 as cofactors, respectively.

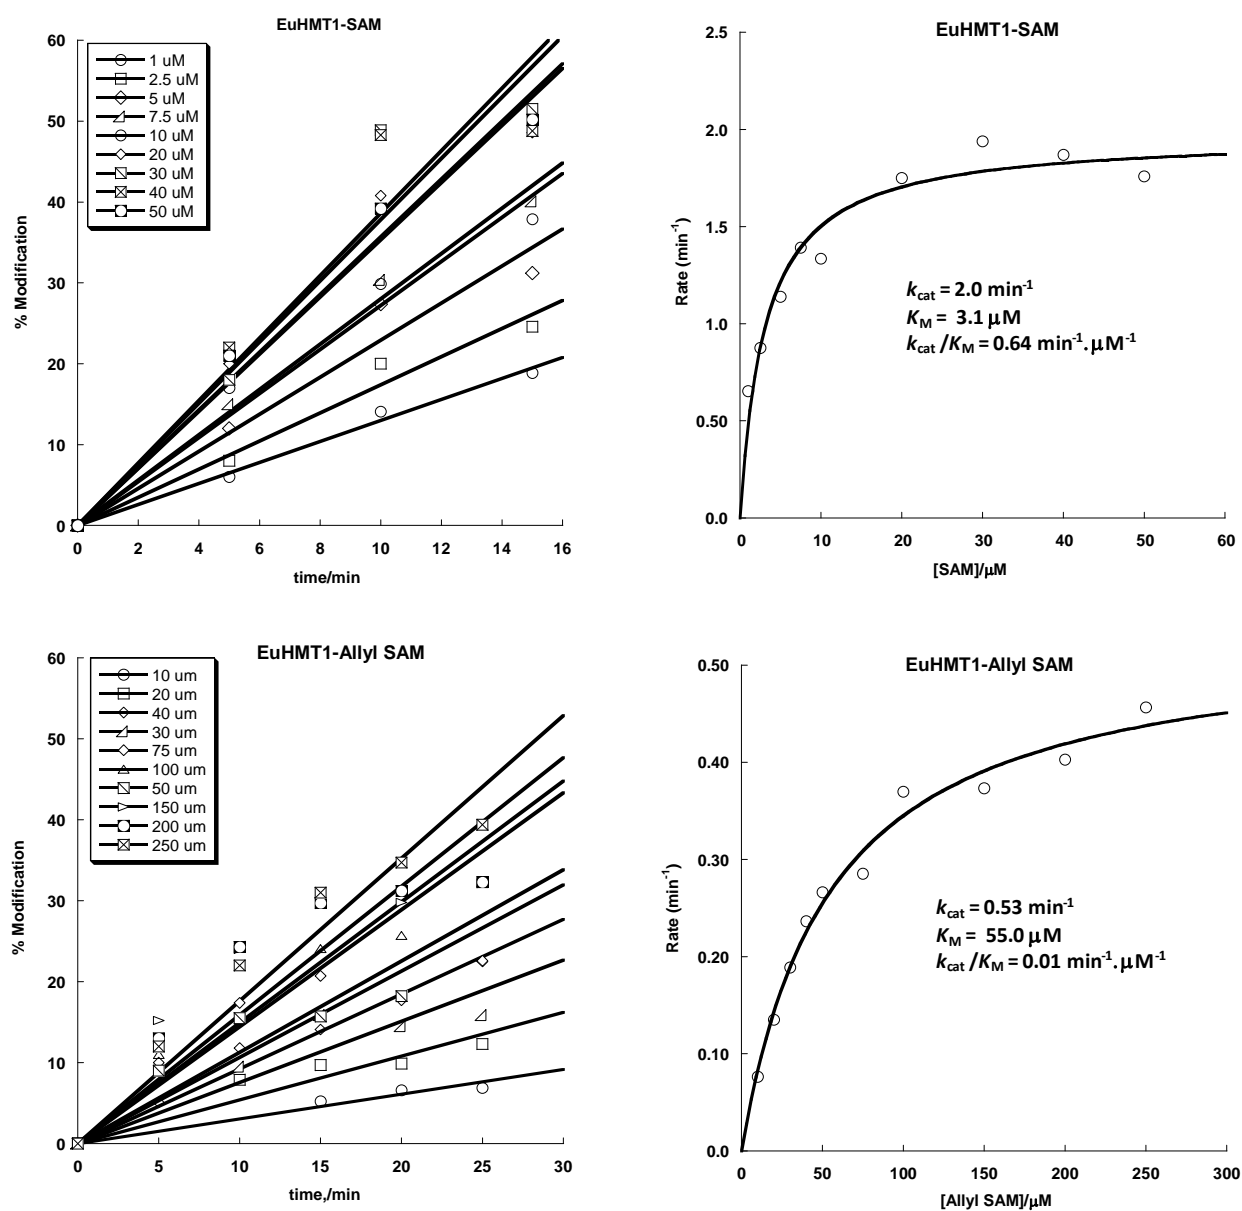

**Figure S8 continued.** Here 0.5  $\mu\text{M}$  and 1  $\mu\text{M}$  of native EuHMT2 were used when SAM and allyl-SAM 2 were used as cofactors, respectively.

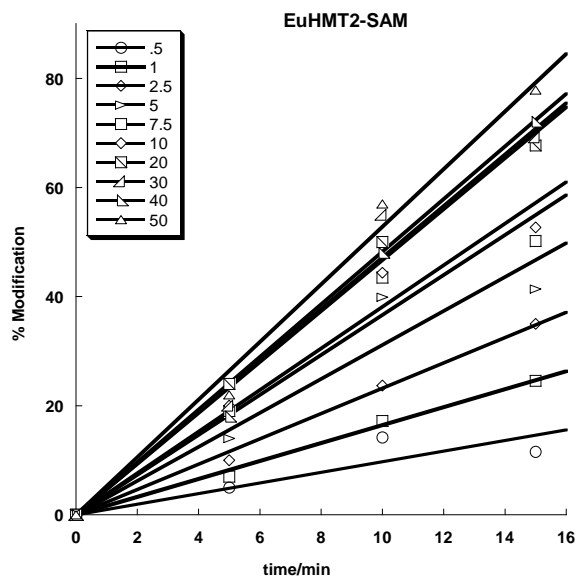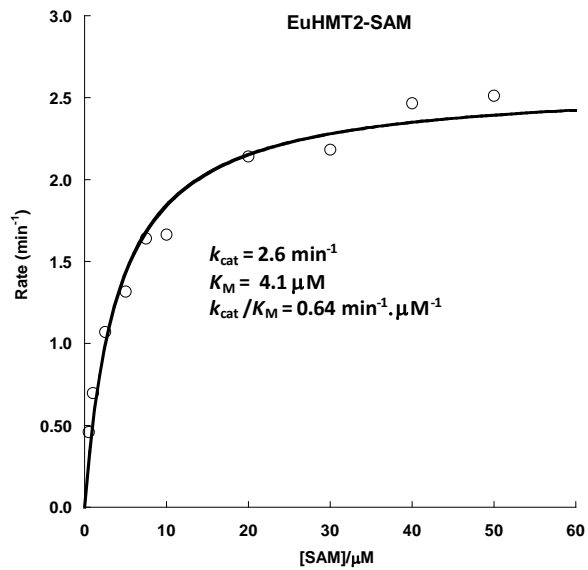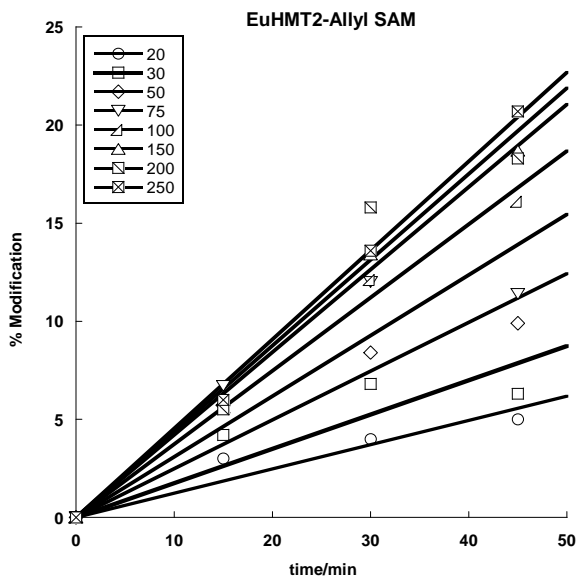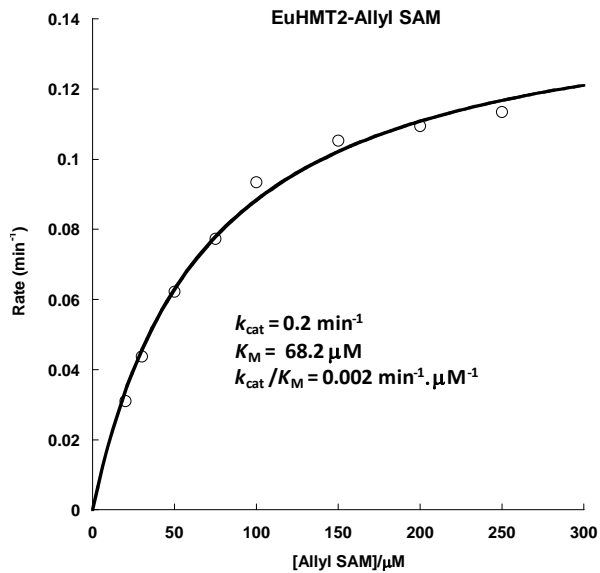

**Figure S8 continued.** In the following experiments, 2  $\mu\text{M}$  of Y1211A and Y1154A mutants were used with SAM and allyl-SAM **2** as cofactors, respectively.

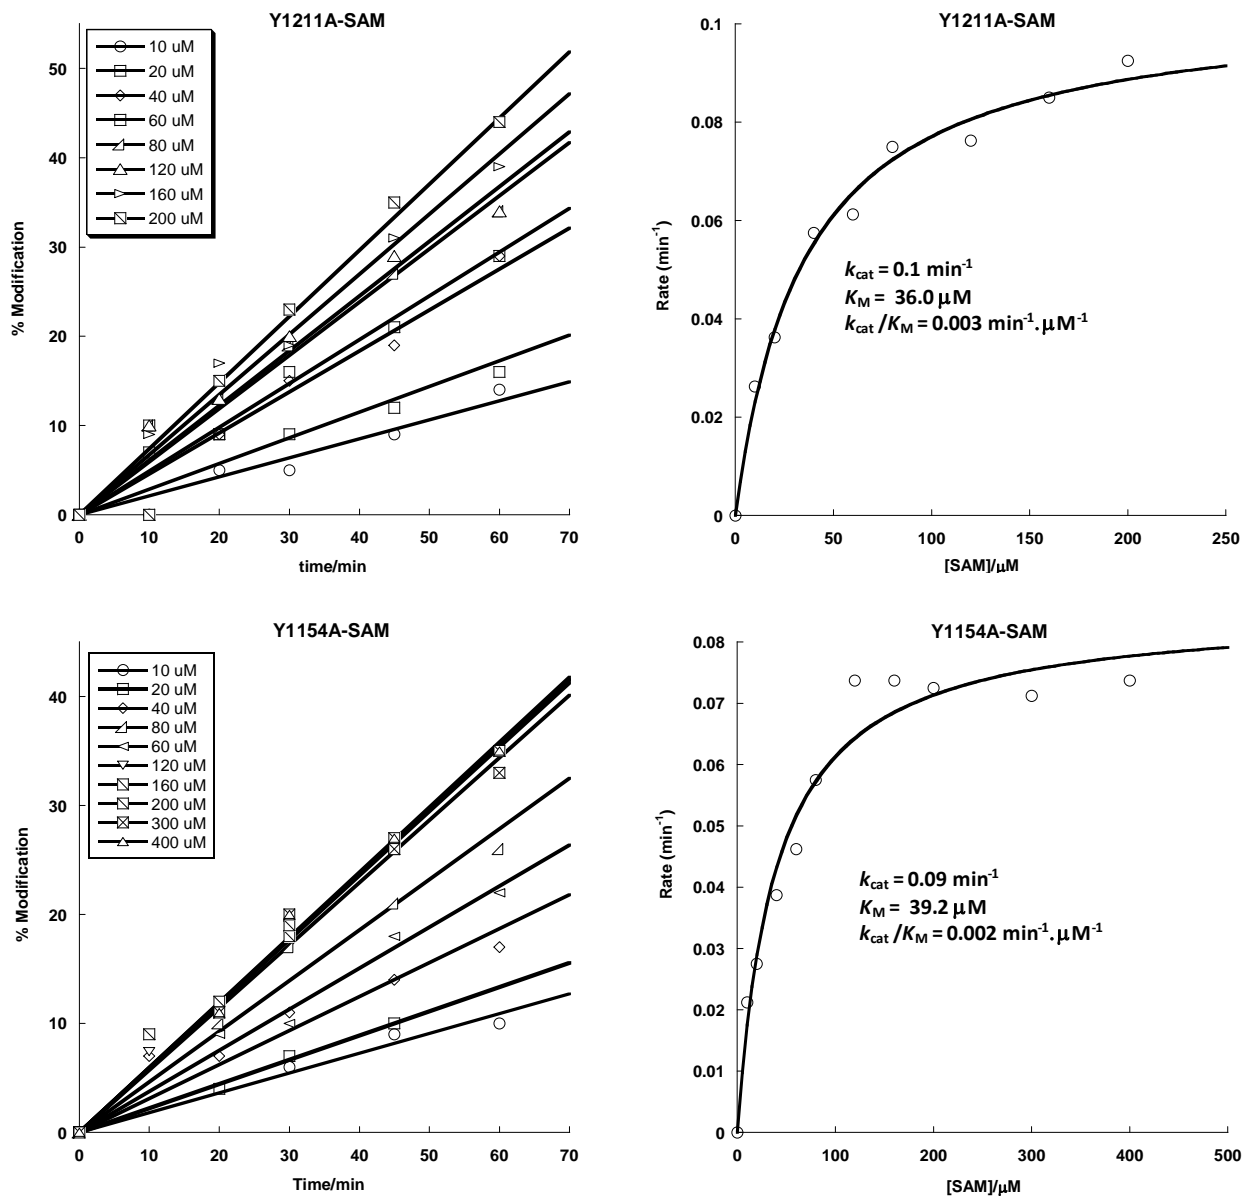

**Figure S8 continued.** In the following figures, 2  $\mu\text{M}$  of Y1211A and Y1154A mutants were used with allyl-SAM 2 as a cofactor.

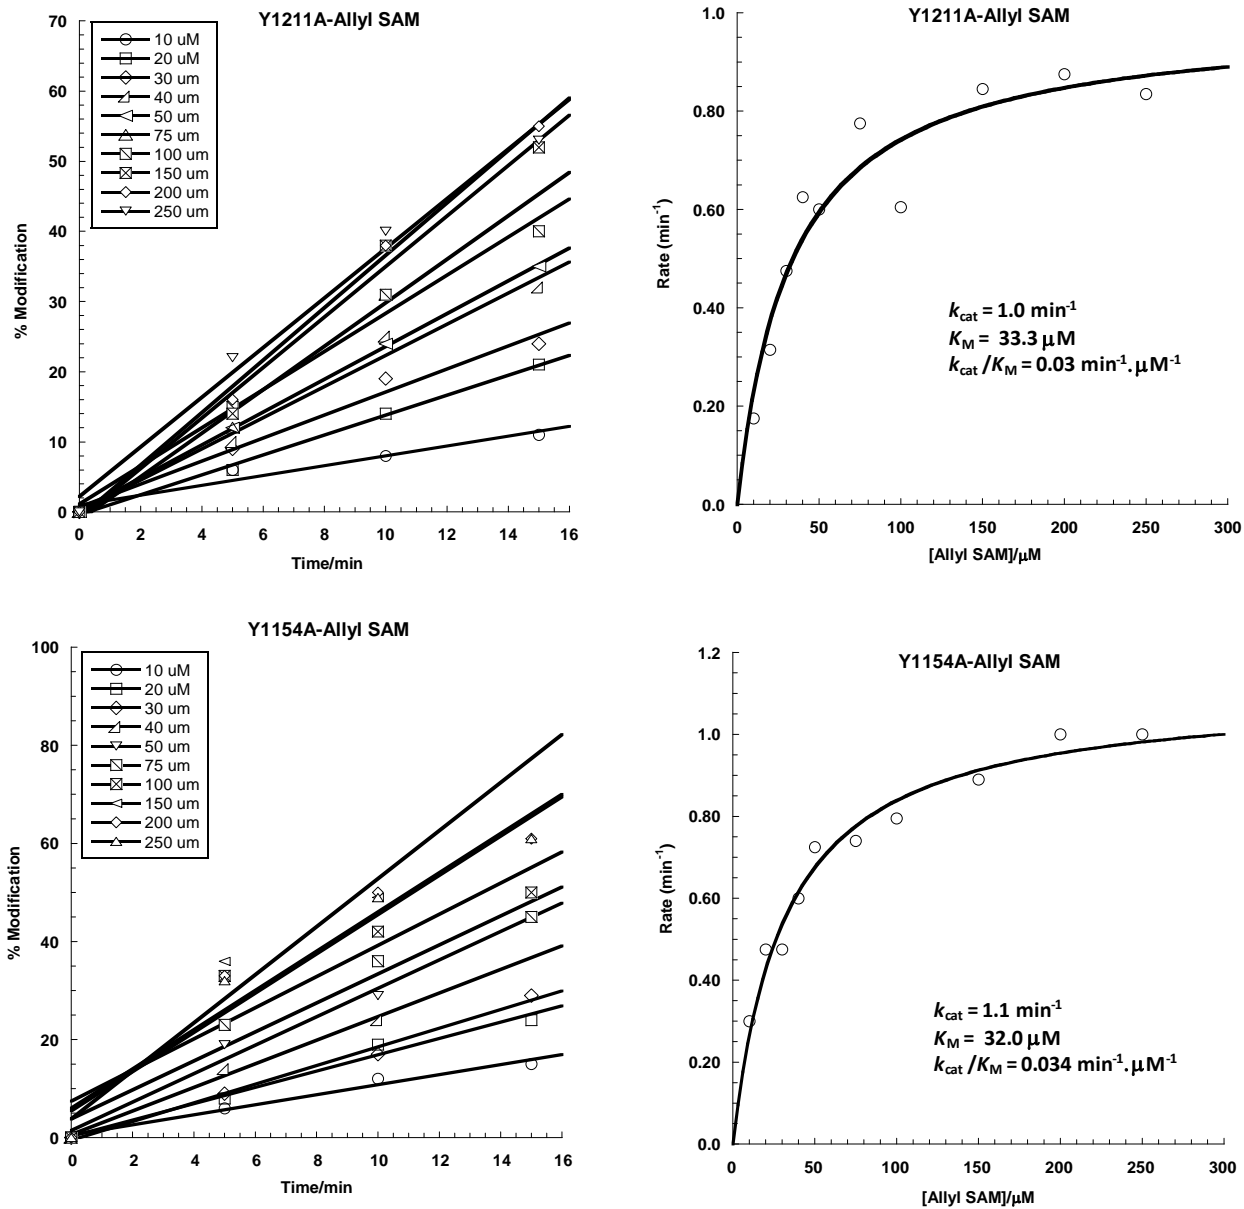

**Figure S8 continued.** In the following figures, 0.75  $\mu\text{M}$  of Y1211A and Y1154A mutants were used with butene-SAM 3 as a cofactor.

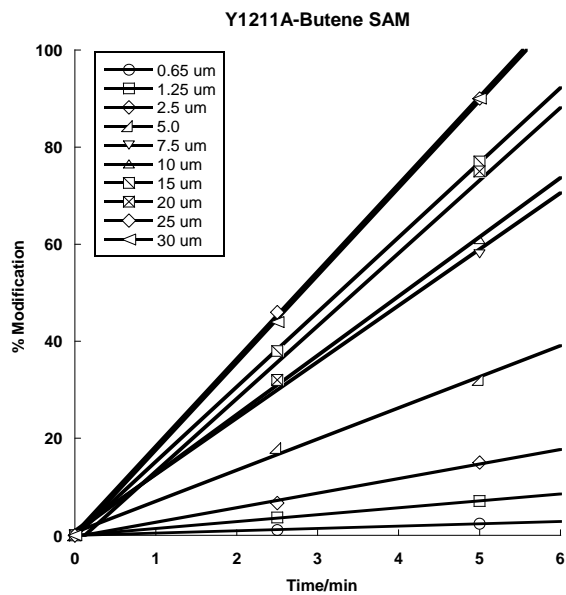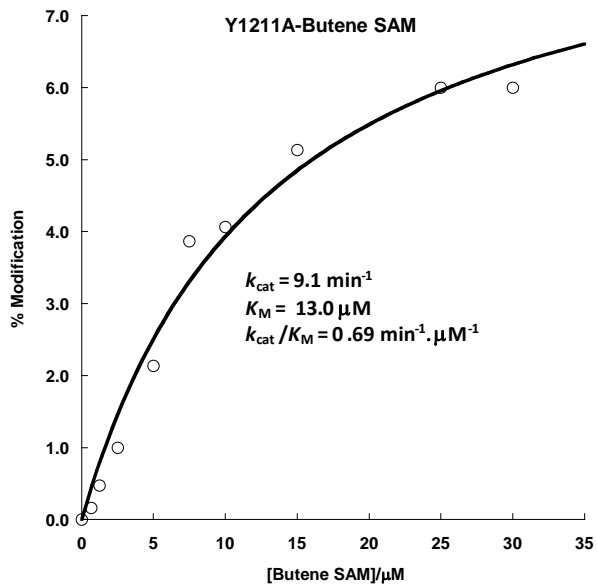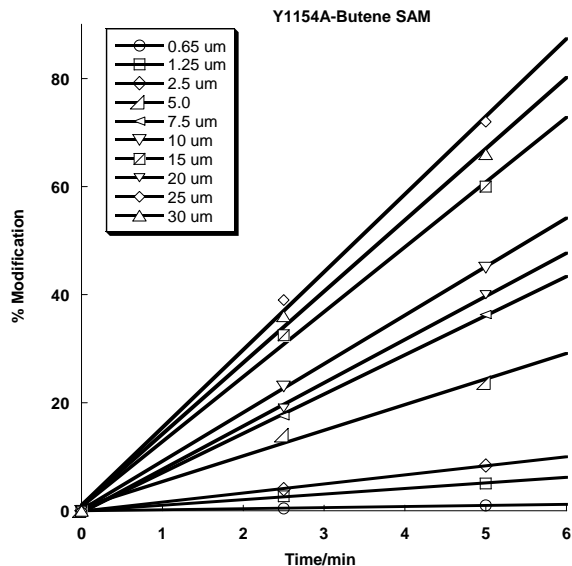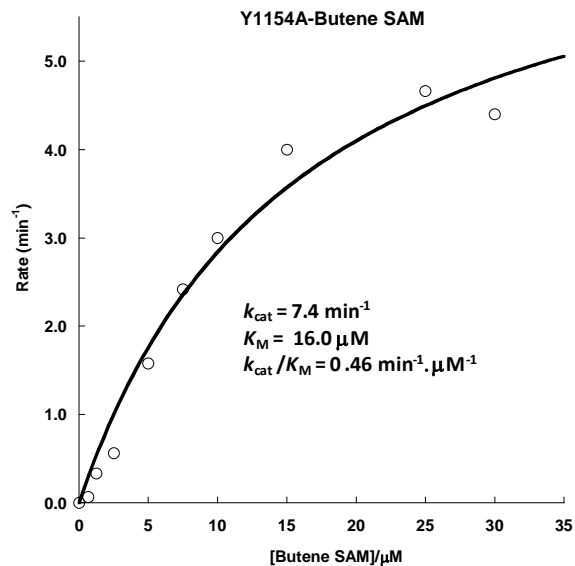

**Figure S8 continued.** In the following figures, 0.75  $\mu\text{M}$  of Y1211A and Y1154A mutants were used with pentene-SAM **4** as a cofactor.

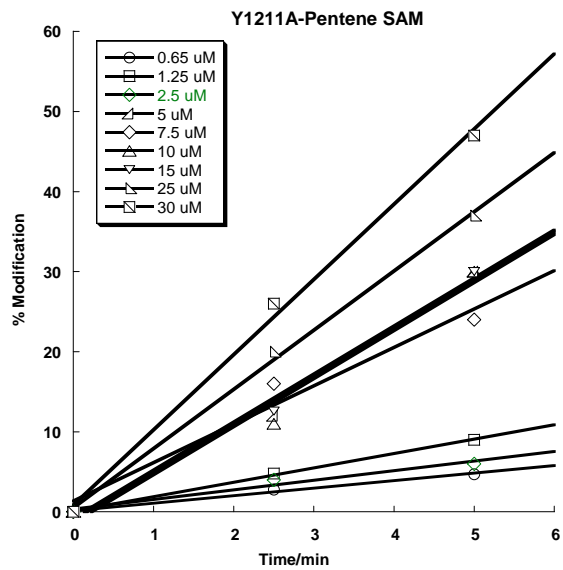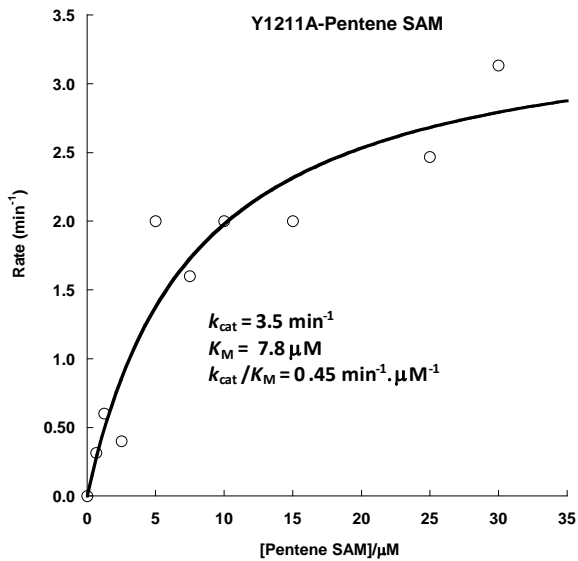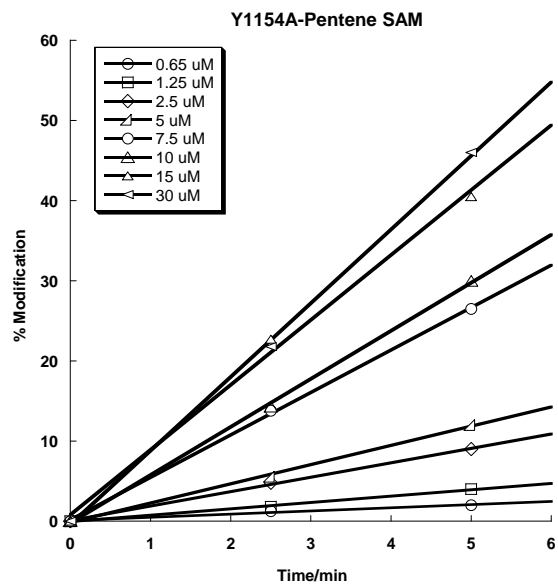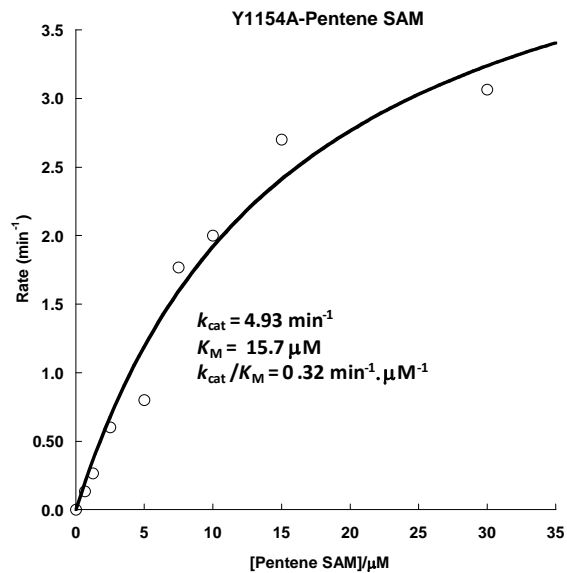

**Figure S8 continued.** In the following figures, 2  $\mu\text{M}$  of Y1211A and Y1154A mutants were used with enyn-SAM 5 as a cofactor.

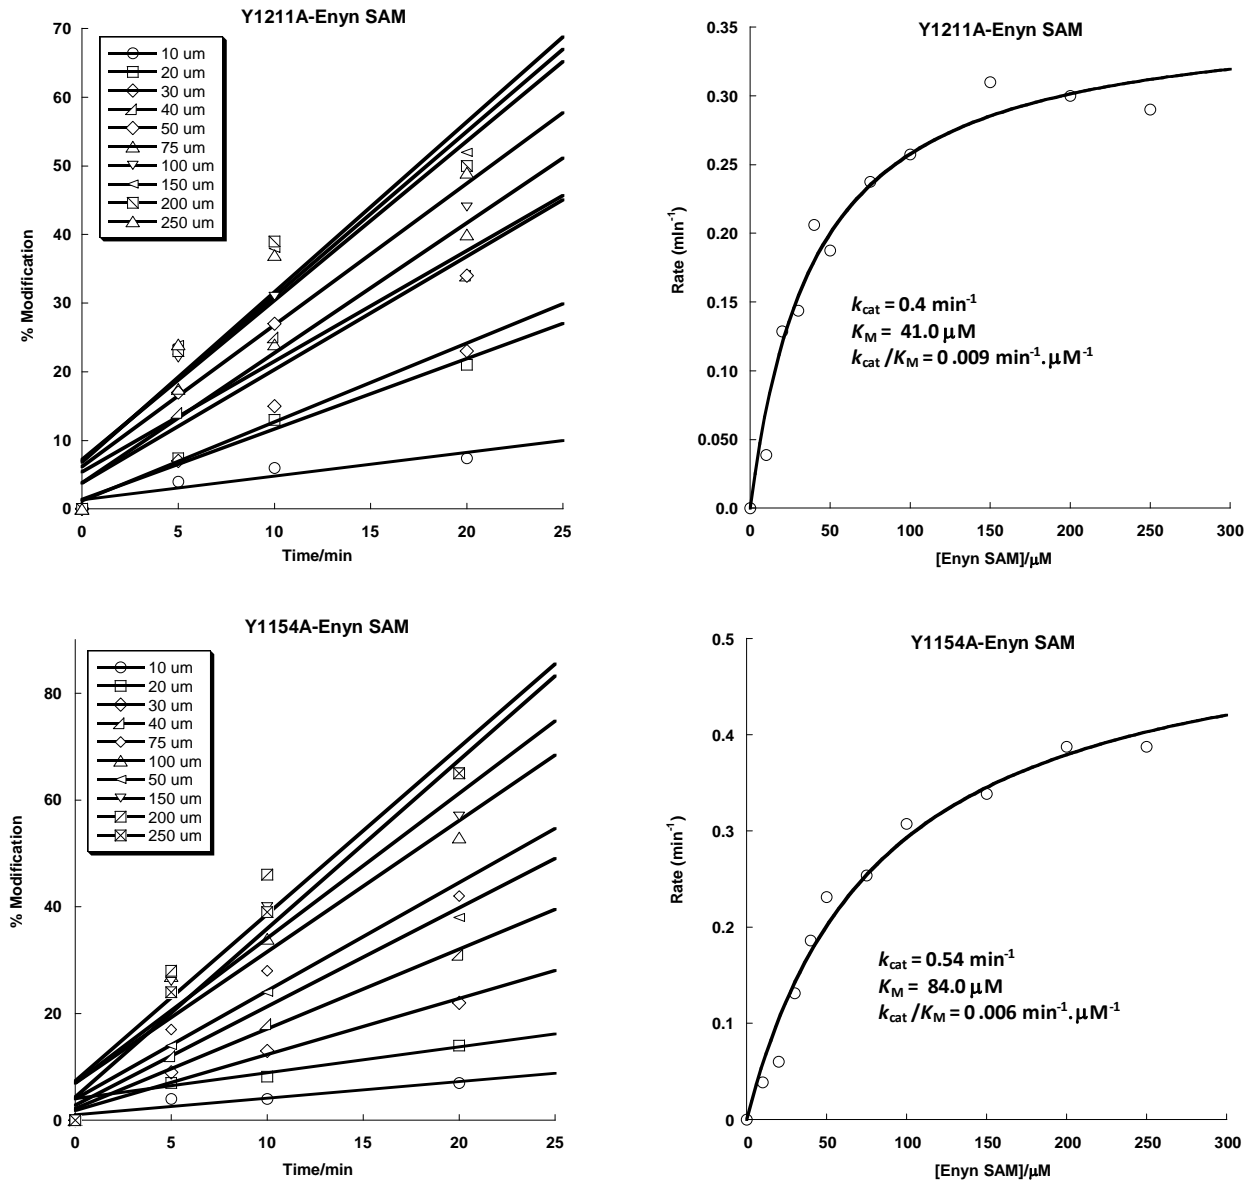



**Figure S8 continued.** In the following figures, 1  $\mu\text{M}$  of Y1211A and Y1154A mutants were used with Hey-SAM 6 as a cofactor.

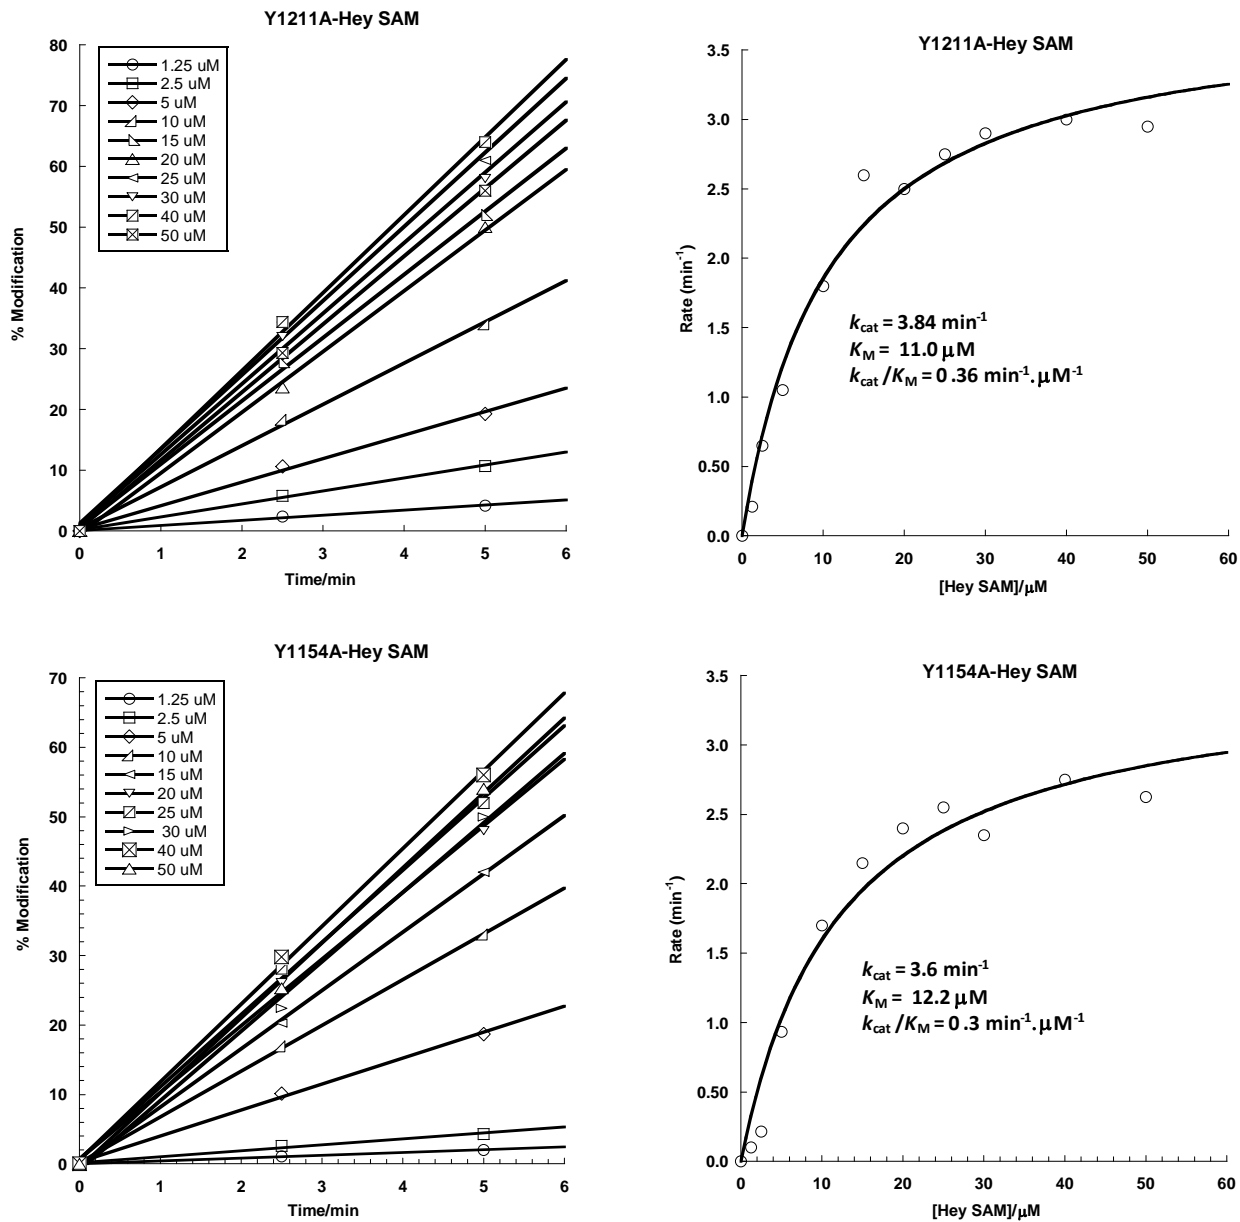

**Figure S8 continued.** In the following figures, 3  $\mu\text{M}$  of Y1211A and Y1154A mutants were used with SAM analogue **7** as a cofactor.

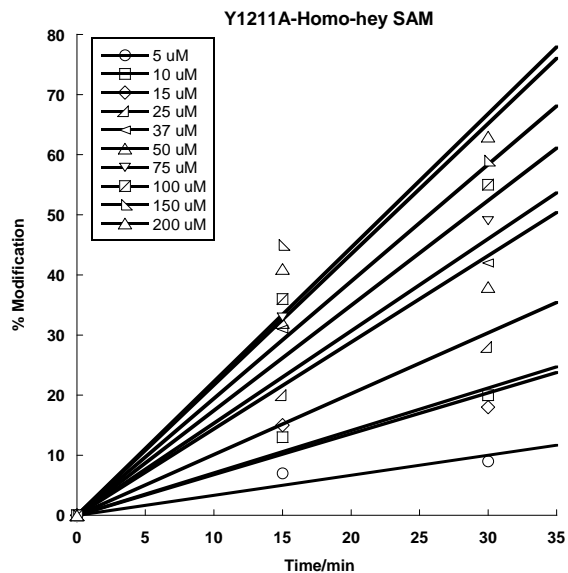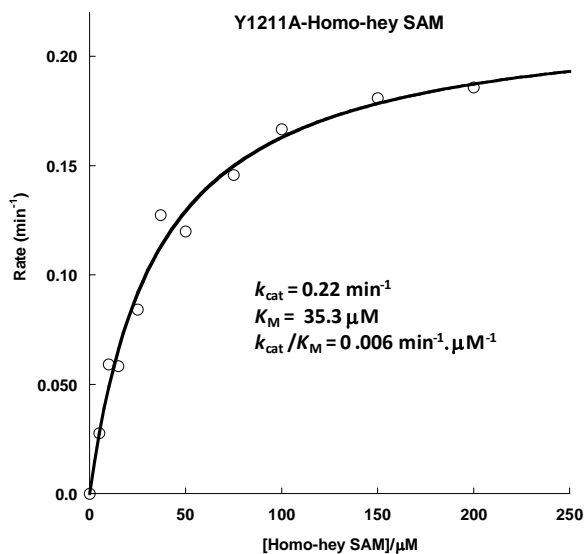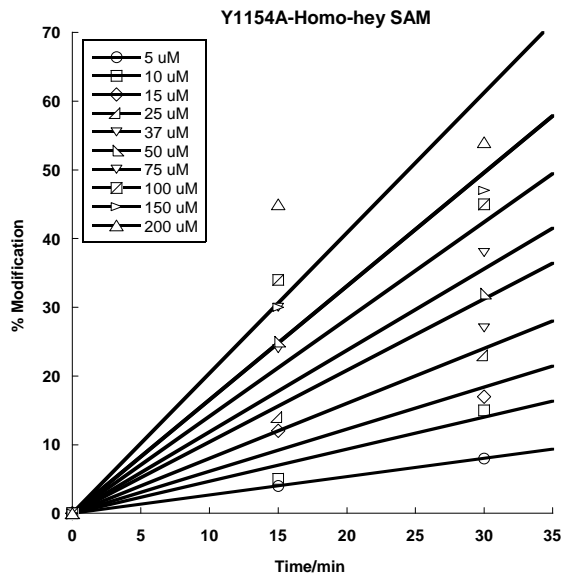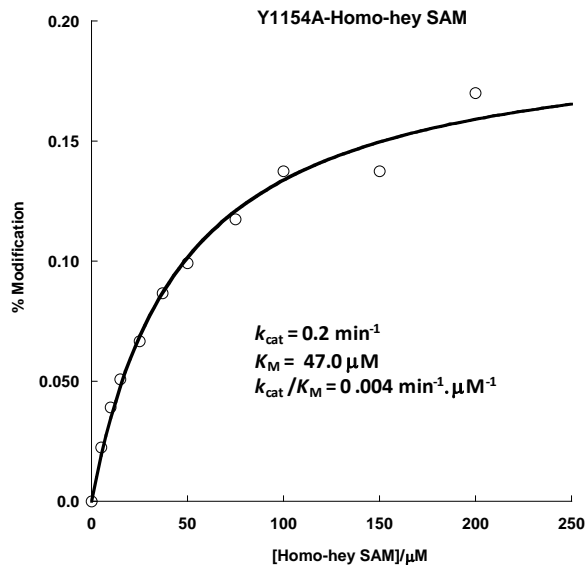

**Figure S9.** Steady-state kinetic analysis of native EuHMT1/2 and Y1211A/Y1154A mutants with SAM **1** and its analogues **2–7** as cofactors. Apparent  $k_{\text{cat}}$  and  $K_m$  of native EuHMT1/2 and the most promiscuous Y1211A/Y1154A variants on **1–7** were obtained with the fixed concentration of H3K9 peptide substrate (25  $\mu\text{M}$ ) and the varied concentration of cofactors.

|                      |                                                                 |                                                                 |                                                               |                                                                |                                                                 |                                                               |                                                                 |
|----------------------|-----------------------------------------------------------------|-----------------------------------------------------------------|---------------------------------------------------------------|----------------------------------------------------------------|-----------------------------------------------------------------|---------------------------------------------------------------|-----------------------------------------------------------------|
| <b>Native EuHMT1</b> | $k_{\text{cat}}=2.0$<br>$K_m=3.1$<br>$k_{\text{cat}}/K_m=0.64$  | $k_{\text{cat}}=0.53$<br>$K_m=55$<br>$k_{\text{cat}}/K_m=0.010$ | –                                                             | –                                                              | –                                                               | –                                                             | –                                                               |
| <b>EuHMT1 Y1211A</b> | $k_{\text{cat}}=0.10$<br>$K_m=36$<br>$k_{\text{cat}}/K_m=0.003$ | $k_{\text{cat}}=1.0$<br>$K_m=33$<br>$k_{\text{cat}}/K_m=0.03$   | $k_{\text{cat}}=9.1$<br>$K_m=13$<br>$k_{\text{cat}}/K_m=0.69$ | $k_{\text{cat}}=3.5$<br>$K_m=7.8$<br>$k_{\text{cat}}/K_m=0.45$ | $k_{\text{cat}}=0.36$<br>$K_m=41$<br>$k_{\text{cat}}/K_m=0.009$ | $k_{\text{cat}}=3.8$<br>$K_m=11$<br>$k_{\text{cat}}/K_m=0.36$ | $k_{\text{cat}}=0.22$<br>$K_m=35$<br>$k_{\text{cat}}/K_m=0.006$ |
| <b>Native EuHMT2</b> | $k_{\text{cat}}=2.6$<br>$K_m=4.0$<br>$k_{\text{cat}}/K_m=0.64$  | $k_{\text{cat}}=0.15$<br>$K_m=68$<br>$k_{\text{cat}}/K_m=0.002$ | –                                                             | –                                                              | –                                                               | –                                                             | –                                                               |
| <b>EuHMT2 Y1154A</b> | $k_{\text{cat}}=0.08$<br>$K_m=39$<br>$k_{\text{cat}}/K_m=0.002$ | $k_{\text{cat}}=1.1$<br>$K_m=32$<br>$k_{\text{cat}}/K_m=0.034$  | $k_{\text{cat}}=7.4$<br>$K_m=16$<br>$k_{\text{cat}}/K_m=0.46$ | $k_{\text{cat}}=4.9$<br>$K_m=16$<br>$k_{\text{cat}}/K_m=0.32$  | $k_{\text{cat}}=0.54$<br>$K_m=84$<br>$k_{\text{cat}}/K_m=0.006$ | $k_{\text{cat}}=3.6$<br>$K_m=12$<br>$k_{\text{cat}}/K_m=0.30$ | $k_{\text{cat}}=0.20$<br>$K_m=46$<br>$k_{\text{cat}}/K_m=0.004$ |

$k_{\text{cat}}$  is expressed in  $\text{min}^{-1}$  and  $K_m$  is in  $\mu\text{M}$ .

**Figure S10.** Labeling of proteome-wide substrates of EuHMT1/2. **(A)** Visualization of putative substrates of EuHMT1/2 via in-gel fluorescence. Lysates of 40  $\mu$ g from the empty-vector-transfected cells (control) and EuHMT1/2 mutants-transfected cells were subject to enzymatic modification with Hey-SAM 6 followed by in-gel fluorescence visualization. **(B)** Coomassie staining of the SDS-PAGE showed that equal amount of proteins was loaded. **(C)** Heat-map analysis of EuHMT1/2's targets revealed by BPPM. The substrates are organized on the basis of their MS score with a range of  $\geq 2$  and  $\leq 100$  (see table S2-S4). The proteins with score  $< 2$  were excluded and with score  $> 100$  were normalized to 100.

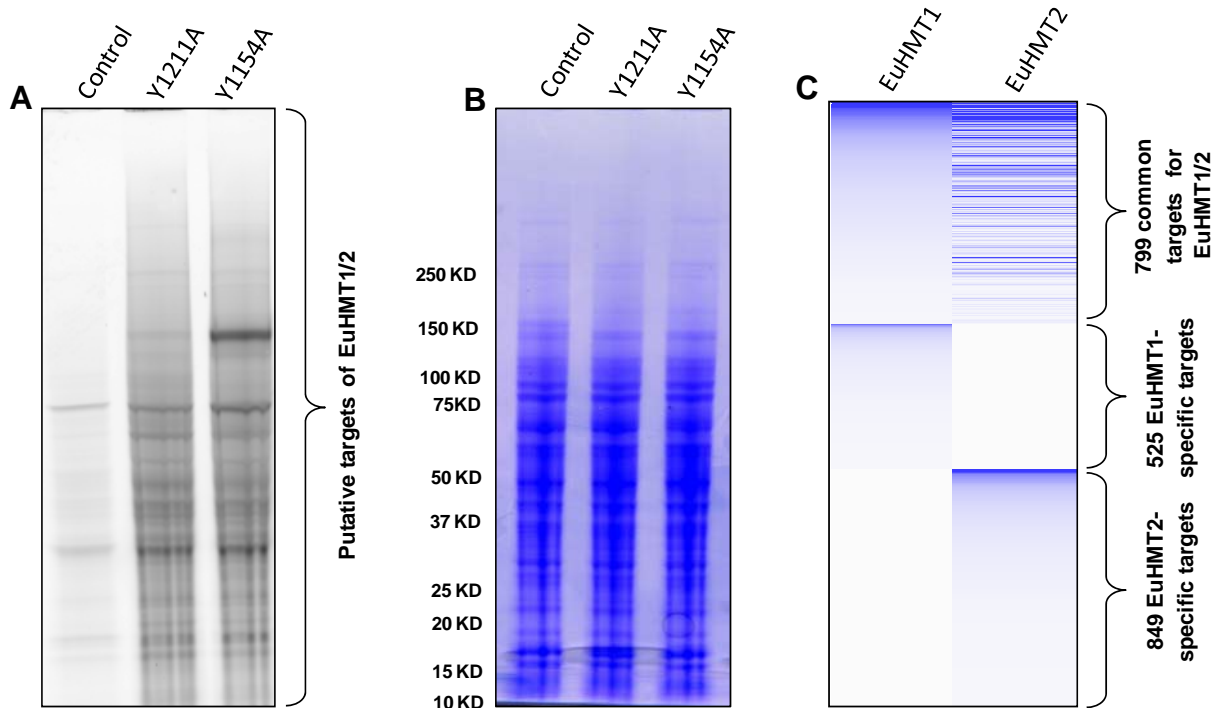

**Figure S11.** Demonstration of *in vitro* methylation activities of EuHMT1/2 using the native enzyme-cofactor pairs (EuHMT1/2 and 3H-SAM) via autoradiography assay. Examined were a panel of BPPM-revealed, commercially available non-histone substrates of EuHMT1/2: TARS, threonyl-tRNA synthetase (IPI00329633.5); ACLY, ATP citrate synthase/lyase (IPI00021290.5); IDH1, soluble isocitrate dehydrogenase 1 (NADP+, IPI01015385.1); PRMT5, protein arginine N-methyltransferase 5 (IPI00064328.3); EEF1A1, eukaryotic translation elongation factor 1 alpha 1 (IPI00940393.3); POLR2A, DNA-directed RNA polymerase II subunit RPB1 (IPI00031627.4, in the current study C-terminal domain was used); HAT1, histone acetyltransferase 1; PARP1, poly-[ADP-ribose] polymerase 1 (IPI00449049.5); PKIM1/2, pyruvate kinase isozymes M1/M2 (IPI00220644.8); HNRPK, heterogeneous nuclear ribonucleoprotein K (IPI00216049.1).

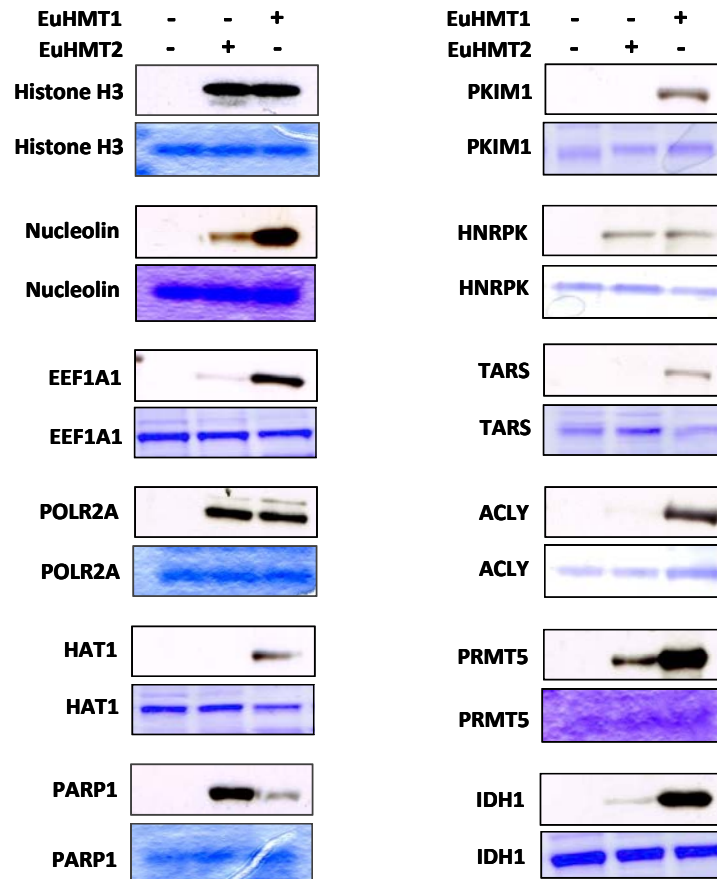

**Figure S12.** Functional annotation of EuHMT1/2's nonhistone targets. **(A)** Subcellular localization of the BPPM-revealed EuHMT1/2 substrates of high confidence (present in the mutant- but not in empty vector-transfected cells) analyzed by Proteome Discover software. **(B)** Cellular and molecular functions of EuHMT1/2 substrates of high confidence analyzed by IPA. **(C)** Physiological functions of the BPPM-revealed EuHMT1/2 substrates of high confidence.

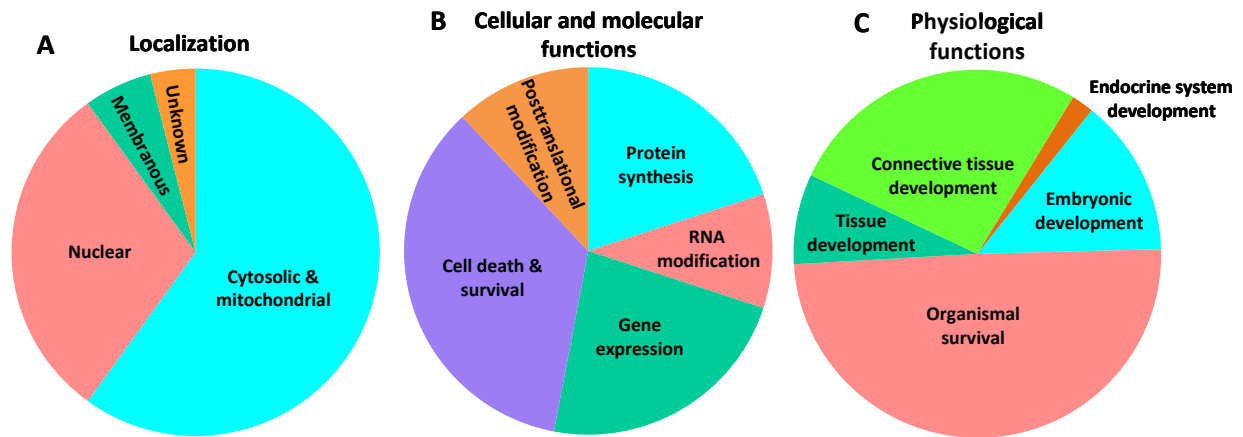

**Figure S13.** Proposed model to accommodate bulky SAM analogues by removing the conserved gatekeeper Tyr. (B-D) Proposed transition states (TS) of native EuHMT1 and its Y1211A with H3K9 substrate and SAM/SAM analogue cofactors.

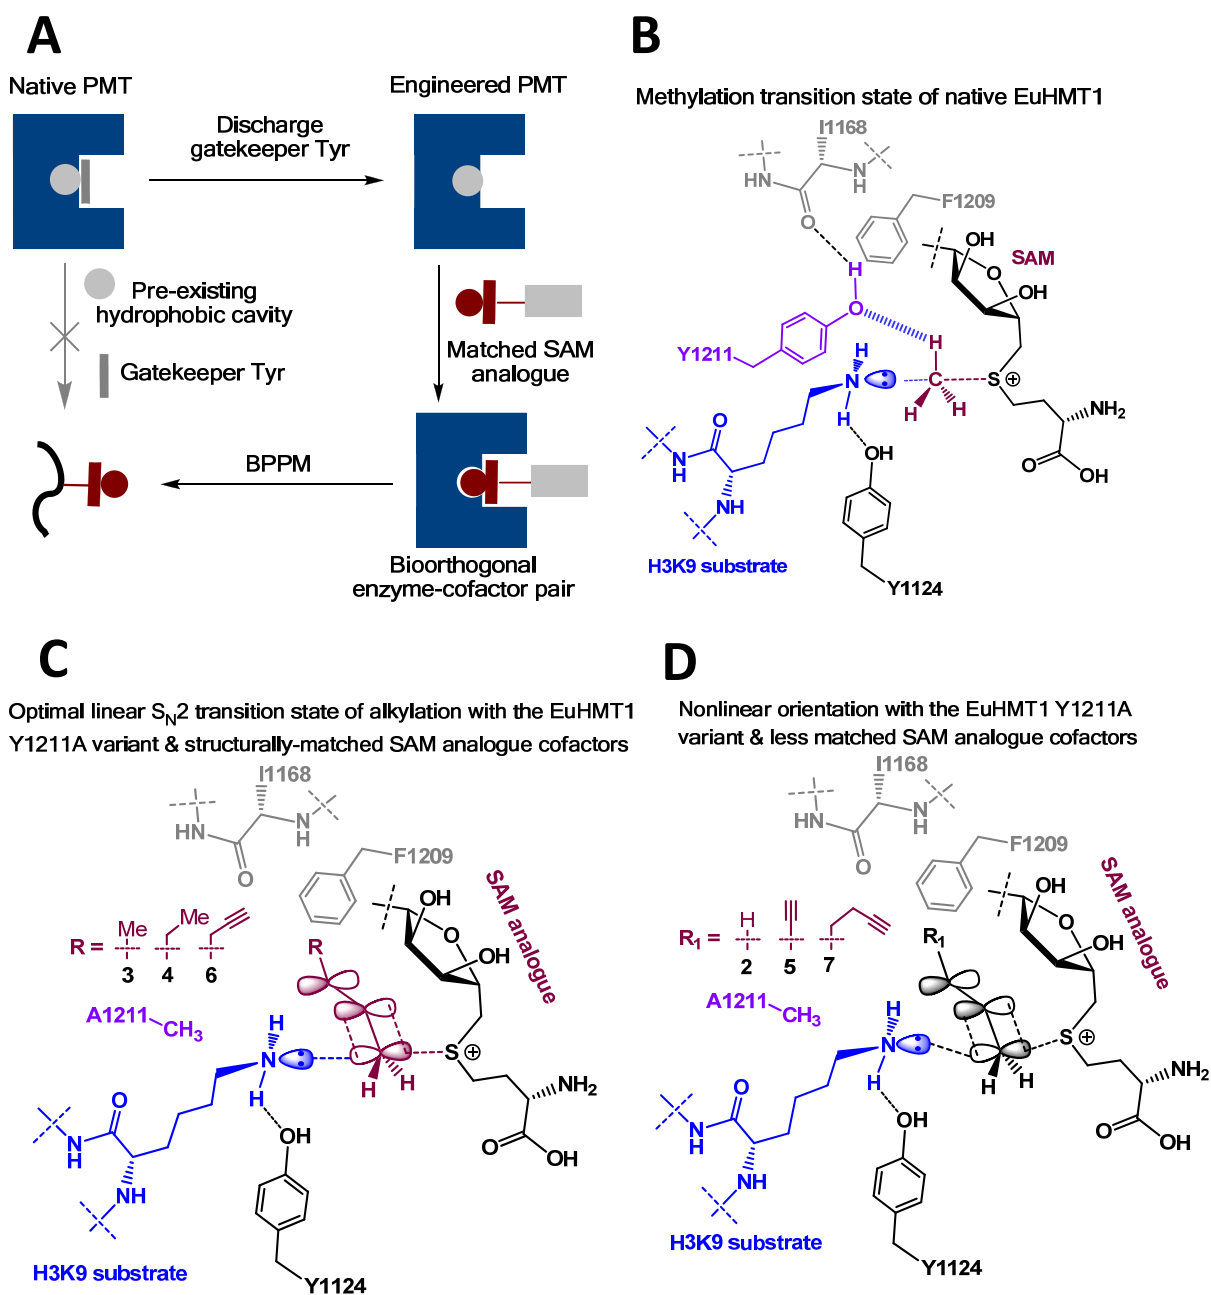

**Figure S14.** Structure-based multiple sequence alignment of representative SET-domain-containing PMTs. Identical residues, highly similar, and similar residues are highlighted in red, green, and blue, respectively. Secondary structure elements of human EuHMT1 are assigned by the PROCHECK program (S14) and shown above the aligned sequences. Here the helices are designed as cylinders and the strands as arrow bars. The highly-conserved gatekeeper tyrosine is marked with a green triangle and the residues to form the nearby hydrophobic cavity (EuHMT1's I1168/N1169/H1170/F1209/F1215/W1216 residues as an example) are marked with asterisks. The hydrophobic residues corresponding to F1215/W1216 are shown in blue boxes.

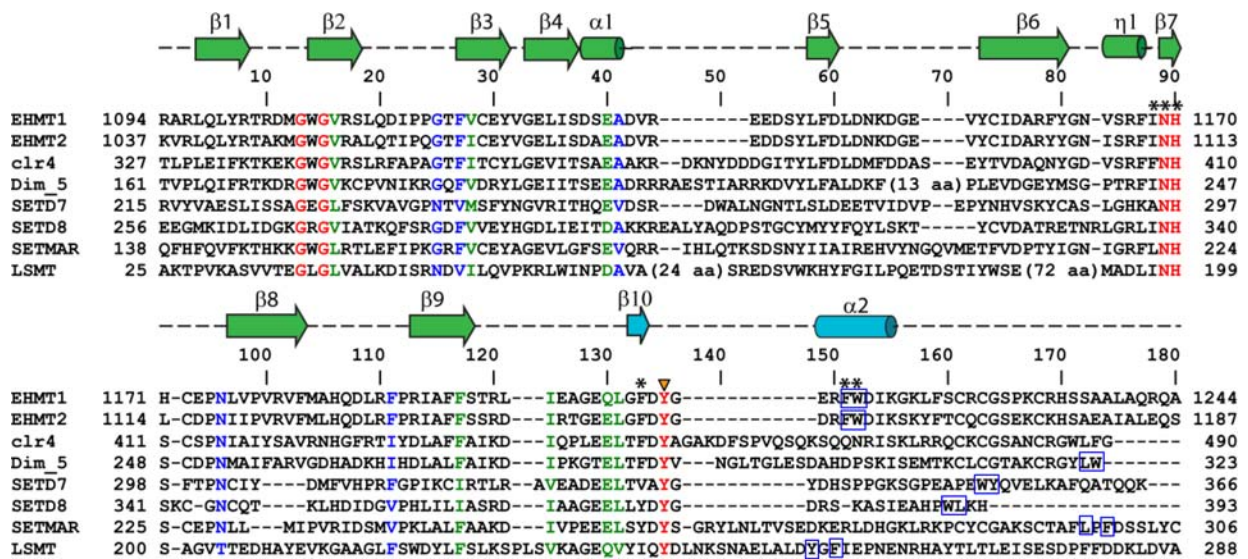



**Table S1.** Crystallographic data and refinement statistics.

|                                                     | Y1211A+ H3K9(allyl)                           |
|-----------------------------------------------------|-----------------------------------------------|
| <b>PDB Code</b>                                     | 4H4H                                          |
| <b>Data collection</b>                              |                                               |
| Space group                                         | P2 <sub>1</sub> 2 <sub>1</sub> 2 <sub>1</sub> |
| Cell dimensions                                     |                                               |
| <i>a, b, c</i> (Å)                                  | 83.50, 83.80, 95.05                           |
| $\alpha, \beta, \gamma$ (°)                         | 90, 90, 90                                    |
| Resolution (Å) (highest resolution shell)           | 50.00-1.90 (1.95-1.90)                        |
| <i>R</i> <sub>merge</sub>                           | 7.2 (56.1)                                    |
| <i>I</i> / $\sigma$ <i>I</i>                        | 31.6 (2.2)                                    |
| Completeness(%)                                     | 98.6 (83.0)                                   |
| Redundancy                                          | 7.9 (5.2)                                     |
| <b>Refinement</b>                                   |                                               |
| Resolution (Å)                                      | 50.00-1.90                                    |
| No. reflections                                     | 50,279                                        |
| <i>R</i> <sub>work</sub> / <i>R</i> <sub>free</sub> | 0.179/0.224                                   |
| No. atoms                                           |                                               |
| Protein                                             | 4,334                                         |
| Cofactor                                            | 52                                            |
| Water                                               | 518                                           |
| Peptide                                             | 118                                           |
| B-factors (Å <sup>2</sup> )                         | 30.4                                          |
| Protein                                             | 18.9                                          |
| Cofactor                                            | 24.9                                          |
| Peptide                                             | 27.7                                          |
| Water                                               | 27.0                                          |
| RMSD                                                |                                               |
| Bond lengths (Å)                                    | 0.008                                         |
| Bond angles (°)                                     | 1.145                                         |
| Ramachandran plot % residues                        |                                               |
| Favored                                             | 98.0                                          |
| Additional allowed                                  | 2.0                                           |
| Generously allowed                                  | None                                          |
| Disallowed                                          | None                                          |

**Table S2.** BPPM-revealed potential nonhistone targets of EuHMT1 in HEK293T cells with the EuHMT1-Y1211A mutant and Hey-SAM 6 as BPPM reagents. These proteins are not present in the control (empty-vector transfected HEK293T cells).

| Serial | Accession     | Description                                                                | Score of EuHMT1 |
|--------|---------------|----------------------------------------------------------------------------|-----------------|
| 1      | IPI00376215.2 | Isoform 2 of DNA-dependent protein kinase catalytic subunit                | 208.3085556     |
| 2      | IPI00793119.2 | cDNA FLJ56274, highly similar to Transketolase                             | 79.90027404     |
| 3      | IPI00218319.3 | Isoform 2 of Tropomyosin alpha-3 chain                                     | 70.50005794     |
| 4      | IPI00007423.1 | Isoform 1 of Acidic leucine-rich nuclear phosphoprotein 32 family member B | 63.75586653     |
| 5      | IPI00419373.1 | Isoform 1 of Heterogeneous nuclear ribonucleoprotein A3                    | 56.75522494     |
| 6      | IPI00640006.1 | rab GDP dissociation inhibitor beta isoform 2                              | 53.96958017     |
| 7      | IPI00965327.1 | succinate dehydrogenase complex, subunit A, flavoprotein (Fp)              | 52.61379075     |
| 8      | IPI00419880.6 | 40S ribosomal protein S3a                                                  | 48.47704196     |
| 9      | IPI00513955.1 | cDNA FLJ55283, moderately similar to Protein mago nashi homolog            | 45.6518743      |
| 10     | IPI00419258.4 | High mobility group protein B1                                             | 43.15532923     |
| 11     | IPI00219097.4 | High mobility group protein B2                                             | 38.17082167     |
| 12     | IPI00032158.3 | Isoform 2 of N-alpha-acetyltransferase 15, NatA auxiliary subunit          | 37.94827914     |
| 13     | IPI01015565.1 | ubiquitin C                                                                | 33.89626837     |
| 14     | IPI00552715.1 | T-complex protein 1 subunit gamma isoform c                                | 33.83686447     |
| 15     | IPI00375127.4 | eukaryotic translation initiation factor 4H                                | 33.41157961     |
| 16     | IPI00552190.1 | Proteasome (Prosome, macropain) 26S subunit, non-ATPase, 10                | 32.44333482     |
| 17     | IPI00007797.3 | Fatty acid-binding protein, epidermal                                      | 32.30974603     |
| 18     | IPI00788942.1 | Isoform 2 of RuvB-like 1                                                   | 28.92567086     |
| 19     | IPI00414696.1 | Isoform A2 of Heterogeneous nuclear ribonucleoproteins A2/B1               | 28.35218573     |
| 20     | IPI00018534.4 | Histone H2B type 1-L                                                       | 26.84758949     |
| 21     | IPI00783118.2 | 5'-nucleotidase domain-containing protein 2 isoform 1                      | 26.36745024     |
| 22     | IPI00032140.4 | Serpin H1                                                                  | 26.17618561     |
| 23     | IPI00915869.3 | malate dehydrogenase, cytoplasmic isoform 3                                | 26.06665564     |
| 24     | IPI01011970.1 | phosphogluconate dehydrogenase                                             | 25.76162124     |
| 25     | IPI01015355.1 | aconitase 2, mitochondrial                                                 | 25.55280709     |
| 26     | IPI00984060.1 | glutathione S-transferase Mu 2 isoform 2                                   | 25.12881255     |
| 27     | IPI00980749.1 | heat shock 70kDa protein 8                                                 | 24.39236546     |
| 28     | IPI00885057.1 | Isoform 2 of Cysteine and histidine-rich domain-containing protein 1       | 24.32220984     |
| 29     | IPI00909453.2 | heat shock 27kDa protein 1                                                 | 24.1226244      |
| 30     | IPI01011083.1 | cDNA FLJ55960, highly similar to Protein transport protein Sec23A          | 23.34211493     |
| 31     | IPI00926815.1 | ribosomal protein L37a                                                     | 23.03368974     |
| 32     | IPI00293305.4 | Isoform Beta-1B of Integrin beta-1                                         | 22.0308578      |
| 33     | IPI00793677.1 | chromosome 21 open reading frame 33                                        | 21.87474656     |
| 34     | IPI00815732.1 | Isoform 2 of Multifunctional protein ADE2                                  | 21.49055624     |
| 35     | IPI00027485.3 | Eukaryotic translation initiation factor 4E                                | 21.47505403     |
| 36     | IPI00937278.2 | 26S proteasome non-ATPase regulatory subunit 8                             | 21.38628244     |
| 37     | IPI00945233.1 | mitochondrial 2-oxoglutarate/malate carrier protein isoform 2              | 21.03095818     |
| 38     | IPI00916818.1 | Phosphoglycerate kinase                                                    | 20.46259642     |
| 39     | IPI00023086.3 | 39S ribosomal protein L15, mitochondrial                                   | 20.1815536      |
| 40     | IPI00219065.2 | Isoform 5 of Glycogen debranching enzyme                                   | 19.81091595     |
| 41     | IPI00294159.3 | Tricarboxylate transport protein, mitochondrial                            | 19.68325853     |
| 42     | IPI00984887.1 | ribosomal protein S3                                                       | 19.53965378     |
| 43     | IPI00470674.5 | NADH-cytochrome b5 reductase 1                                             | 19.51842237     |
| 44     | IPI01011090.1 | lactate dehydrogenase B                                                    | 19.31844187     |
| 45     | IPI00023530.7 | Cyclin-dependent kinase 5                                                  | 19.30037332     |
| 46     | IPI00215884.4 | Isoform ASF-1 of Serine/arginine-rich splicing factor 1                    | 17.89297962     |

|    |               |                                                                                  |             |
|----|---------------|----------------------------------------------------------------------------------|-------------|
| 47 | IPI00019927.2 | 26S proteasome non-ATPase regulatory subunit 7                                   | 17.84248114 |
| 48 | IPI01015264.1 | eukaryotic translation initiation factor 2B, subunit 1 alpha, 26kDa              | 17.81041503 |
| 49 | IPI01013355.1 | cDNA FLJ54349, highly similar to Vesicle-fusing ATPase                           | 17.5288763  |
| 50 | IPI00976247.1 | peptidyl-prolyl cis-trans isomerase A-like, partial                              | 17.42233348 |
| 51 | IPI00386751.2 | Isoform 2 of HD domain-containing protein 2                                      | 17.40248156 |
| 52 | IPI00978313.2 | cDNA FLJ53638, highly similar to Annexin A6                                      | 17.3944788  |
| 53 | IPI00719549.2 | RBM14-RBM4 protein isoform 1                                                     | 17.1049633  |
| 54 | IPI00217168.1 | Isoform ZK of Plasma membrane calcium-transporting ATPase 4                      | 16.99586105 |
| 55 | IPI00015905.1 | Exosome complex component RRP4                                                   | 16.95224094 |
| 56 | IPI00927114.1 | ras homolog family member A                                                      | 16.75960922 |
| 57 | IPI00291922.2 | Proteasome subunit alpha type-5                                                  | 16.51718521 |
| 58 | IPI00032955.1 | Isoform 1 of RING finger protein 114                                             | 16.17715096 |
| 59 | IPI00910270.1 | PITH (C-terminal proteasome-interacting domain of thioredoxin-like) domain co    | 16.03422451 |
| 60 | IPI00554742.3 | Isoform 2 of Apoptosis inhibitor 5                                               | 15.79603648 |
| 61 | IPI00411816.3 | 39S ribosomal protein L2, mitochondrial                                          | 15.5231719  |
| 62 | IPI00011274.3 | Isoform 1 of Heterogeneous nuclear ribonucleoprotein D-like                      | 15.15570092 |
| 63 | IPI00419802.4 | Isoform 1 of 3-hydroxyisobutyryl-CoA hydrolase, mitochondrial                    | 15.12682176 |
| 64 | IPI00748145.2 | Isoform 1 of Guanine nucleotide-binding protein G(i) subunit alpha-2             | 15.10663915 |
| 65 | IPI00745568.2 | Isoform 1 of TIP41-like protein                                                  | 14.99305558 |
| 66 | IPI00022314.1 | Superoxide dismutase [Mn], mitochondrial                                         | 14.97399402 |
| 67 | IPI00026519.1 | Peptidyl-prolyl cis-trans isomerase F, mitochondrial                             | 14.72927189 |
| 68 | IPI00974011.1 | inositol(myo)-1(or 4)-monophosphatase 1                                          | 14.70692635 |
| 69 | IPI00473085.3 | Isoform 3 of Dynamin-1-like protein                                              | 14.49450064 |
| 70 | IPI00013184.1 | N-alpha-acetyltransferase 10, NatA catalytic subunit                             | 14.38066006 |
| 71 | IPI00643459.1 | mitochondrial ribosomal protein S16                                              | 14.00365901 |
| 72 | IPI00830052.9 | heat shock 70kDa protein 1-like                                                  | 13.92066193 |
| 73 | IPI01012108.1 | ubiquitin-conjugating enzyme E2D 4 (putative)                                    | 13.79680896 |
| 74 | IPI00793137.2 | Uncharacterized protein                                                          | 13.71066475 |
| 75 | IPI00879451.2 | cDNA FLJ61051, highly similar to HpaII tiny locus 9c protein                     | 13.69041753 |
| 76 | IPI00924536.1 | eukaryotic translation initiation factor 4A2                                     | 13.61659217 |
| 77 | IPI00032823.1 | Exosome complex component CSL4                                                   | 13.57395387 |
| 78 | IPI00940872.2 | Titin, isoform CRA_a                                                             | 13.55056572 |
| 79 | IPI00791634.5 | prohibitin                                                                       | 13.17864013 |
| 80 | IPI00917733.1 | cDNA FLJ10185 fis, clone HEMBA1004509, highly similar to U4/U6.U5 tri-snRNP-ass  | 13.05751348 |
| 81 | IPI00797969.1 | guanine nucleotide binding protein (G protein), beta polypeptide 2               | 12.9626801  |
| 82 | IPI01011952.1 | cDNA FLJ59659, highly similar to Vinculin                                        | 12.95064139 |
| 83 | IPI00789842.3 | zinc phosphodiesterase ELAC protein 2 isoform 3                                  | 12.88316751 |
| 84 | IPI01013371.1 | cDNA FLJ58569, highly similar to Nucleosome assembly protein 1-like 1            | 12.66269946 |
| 85 | IPI00385834.3 | Isoform 2 of KH domain-containing, RNA-binding, signal transduction-associated   | 12.61974573 |
| 86 | IPI00024662.1 | Chromobox protein homolog 5                                                      | 12.54557896 |
| 87 | IPI00015869.2 | Trichohyalin                                                                     | 12.49780846 |
| 88 | IPI00925126.1 | protein kinase, cAMP-dependent, regulatory, type II, alpha                       | 12.47497773 |
| 89 | IPI01011589.1 | cDNA FLJ10484 fis, clone NT2RP2000161, highly similar to Exosome complex exonu   | 12.44991589 |
| 90 | IPI01010049.1 | ubiquitin specific peptidase 28                                                  | 12.18280959 |
| 91 | IPI00384122.5 | cDNA FLJ55034, highly similar to Dihydrolypoyllysine-residue succinyltransferase | 12.10097122 |
| 92 | IPI00470503.2 | Isoform 3 of Inorganic pyrophosphatase 2, mitochondrial                          | 11.5182457  |
| 93 | IPI00909437.1 | Ribosomal protein L15                                                            | 11.42085123 |
| 94 | IPI00643324.1 | Four and a half LIM domains 1                                                    | 11.34323096 |

|     |               |                                                                                 |             |
|-----|---------------|---------------------------------------------------------------------------------|-------------|
| 95  | IPI01011965.1 | Iron regulatory protein 1                                                       | 11.27859068 |
| 96  | IPI00892863.1 | Isoform 2 of Collagen alpha-5(VI) chain                                         | 11.220891   |
| 97  | IPI00978728.1 | NADH dehydrogenase (ubiquinone) flavoprotein 1, 51kDa                           | 11.14177203 |
| 98  | IPI00059718.3 | TRMT61A protein (Fragment)                                                      | 11.04034781 |
| 99  | IPI00946597.1 | acylglycerol kinase                                                             | 10.86086345 |
| 100 | IPI01011463.1 | cDNA FLJ40890 fis, clone UTERU2001024, highly similar to SPLICING FACTOR, ARGIN | 10.85630155 |
| 101 | IPI00186460.7 | Isoform 1 of Collagen alpha-1(II) chain                                         | 10.79398465 |
| 102 | IPI00793985.2 | N(alpha)-acetyltransferase 50, NatE catalytic subunit                           | 10.7655735  |
| 103 | IPI00413214.3 | importin subunit alpha-6                                                        | 10.75346398 |
| 104 | IPI00910176.1 | cDNA FLJ57995, moderately similar to Ubiquitin-conjugating enzyme E2-25 kDa     | 10.74681306 |
| 105 | IPI00976899.1 | ribosomal protein L8                                                            | 10.72774029 |
| 106 | IPI00978608.1 | cold shock domain containing E1, RNA-binding                                    | 10.65494323 |
| 107 | IPI00915872.2 | Trinucleotide repeat containing 6B (Fragment)                                   | 10.33702445 |
| 108 | IPI00217519.3 | Ras-related protein Ral-A                                                       | 10.23424554 |
| 109 | IPI00384061.2 | Isoform 5 of Methyltransferase-like protein 13                                  | 10.20179272 |
| 110 | IPI00983162.1 | poly(A) binding protein, cytoplasmic 1                                          | 10.14514899 |
| 111 | IPI00879783.1 | metastasis associated 1 family, member 3                                        | 10.06823587 |
| 112 | IPI01015038.1 | T-complex protein 1 subunit delta                                               | 9.967740536 |
| 113 | IPI00073779.1 | Isoform 1 of 28S ribosomal protein S35, mitochondrial                           | 9.904862165 |
| 114 | IPI00005707.7 | C-type mannose receptor 2                                                       | 9.816804647 |
| 115 | IPI00022316.3 | 28S ribosomal protein S18b, mitochondrial                                       | 9.807150364 |
| 116 | IPI00016077.1 | Protein NipSnap homolog 2                                                       | 9.705330372 |
| 117 | IPI00165393.1 | Acidic leucine-rich nuclear phosphoprotein 32 family member E                   | 9.69942975  |
| 118 | IPI00910437.1 | cDNA FLJ52417, highly similar to 3'(2'),5'-bisphosphate nucleotidase 1          | 9.686202049 |
| 119 | IPI01009205.1 | RAD23 homolog B (S. cerevisiae)                                                 | 9.626133442 |
| 120 | IPI00643915.1 | Peptidyl-prolyl cis-trans isomerase                                             | 9.595445633 |
| 121 | IPI00301518.6 | Isoform 1 of Mps one binder kinase activator-like 1B                            | 9.466370106 |
| 122 | IPI01011967.1 | cDNA FLJ54535, highly similar to Ribosomal protein S6 kinase alpha-1            | 9.457336903 |
| 123 | IPI00910255.1 | tRNA-yW synthesizing protein 3 homolog (S. cerevisiae)                          | 9.457071781 |
| 124 | IPI00798272.2 | branched-chain-amino-acid aminotransferase, cytosolic isoform 2                 | 9.186050892 |
| 125 | IPI01015230.1 | cDNA FLJ53354, highly similar to Puromycin-sensitive aminopeptidase             | 9.174034595 |
| 126 | IPI01010261.1 | cDNA FLJ30173 fis, clone BRACE2000969, highly similar to 6-phosphofructokinase, | 9.135075808 |
| 127 | IPI00922039.1 | cDNA FLJ57628, highly similar to Homo sapiens membrane-associated ring finge    | 9.084560871 |
| 128 | IPI00646978.4 | lysophospholipase II                                                            | 9.084253073 |
| 129 | IPI00027096.2 | 39S ribosomal protein L19, mitochondrial                                        | 9.016253471 |
| 130 | IPI00908791.2 | L-lactate dehydrogenase                                                         | 8.970396996 |
| 131 | IPI01014610.1 | tRNA methyltransferase 11-2 homolog (S. cerevisiae)                             | 8.936521769 |
| 132 | IPI00946498.1 | stem-loop binding protein                                                       | 8.920324326 |
| 133 | IPI00643370.1 | Tropomyosin 3                                                                   | 8.840212822 |
| 134 | IPI00926959.1 | asparagine synthetase (glutamine-hydrolyzing)                                   | 8.833948374 |
| 135 | IPI00980330.1 | RAP2A, member of RAS oncogene family                                            | 8.804337502 |
| 136 | IPI00304082.8 | Isochorismatase domain-containing protein 1                                     | 8.798935413 |
| 137 | IPI00297089.4 | A-kinase anchor protein 6                                                       | 8.718411922 |
| 138 | IPI00553138.4 | Vesicle-associated membrane protein 2                                           | 8.685631752 |
| 139 | IPI00643317.3 | high mobility group box 3                                                       | 8.609049082 |
| 140 | IPI00399375.2 | Isoform 2 of Thymocyte nuclear protein 1                                        | 8.576127291 |

|     |               |                                                                                  |             |
|-----|---------------|----------------------------------------------------------------------------------|-------------|
| 141 | IPI01011917.1 | prohibitin 2                                                                     | 8.569286823 |
| 142 | IPI00180128.4 | Isoform 2 of Basic leucine zipper and W2 domain-containing protein 1             | 8.532663822 |
| 143 | IPI00642864.2 | Isoform 2 of FAD synthase                                                        | 8.518769503 |
| 144 | IPI01015433.1 | Glutamate dehydrogenase                                                          | 8.490028381 |
| 145 | IPI01015600.1 | Clp29 protein                                                                    | 8.445426226 |
| 146 | IPI00893470.2 | diffuse panbronchiolitis critical region 1                                       | 8.3966887   |
| 147 | IPI00942050.2 | Major histocompatibility complex, class I, C                                     | 8.314289093 |
| 148 | IPI00383078.5 | melanoma antigen family D, 1                                                     | 8.299733639 |
| 149 | IPI00016346.2 | Proline synthetase co-transcribed homolog (Bacterial), isoform CRA_b             | 8.297941685 |
| 150 | IPI00219421.3 | Isoform 2 of Ephrin type-B receptor 2                                            | 8.289919376 |
| 151 | IPI00914971.1 | farnesyl pyrophosphate synthase isoform b                                        | 8.275914669 |
| 152 | IPI00455457.4 | Histone H3                                                                       | 8.2287395   |
| 153 | IPI00647504.2 | Isoform 2 of Protein FAM184A                                                     | 8.141638517 |
| 154 | IPI00000335.1 | Histidine triad nucleotide-binding protein 2, mitochondrial                      | 8.135605812 |
| 155 | IPI00305887.1 | Kinetochore protein Nuf2                                                         | 8.077617884 |
| 156 | IPI00940685.1 | U5 small nuclear ribonucleoprotein 40 kDa protein                                | 8.068724632 |
| 157 | IPI00290184.4 | tRNA (guanine-N(7)-)-methyltransferase                                           | 8.065582037 |
| 158 | IPI00963822.1 | septin 11                                                                        | 8.061227322 |
| 159 | IPI00967259.1 | glucosamine-6-phosphate deaminase 1                                              | 8.058110237 |
| 160 | IPI00000940.1 | Parathyroid hormone                                                              | 8.038056374 |
| 161 | IPI00784990.2 | Ubiquitin C splice variant                                                       | 8.036742687 |
| 162 | IPI00012535.1 | DnaJ homolog subfamily A member 1                                                | 8.005677223 |
| 163 | IPI00219613.6 | cDNA FLJ54537, highly similar to Homo sapiens pitrilysin metalloproteinase 1 (PI | 8.003607035 |
| 164 | IPI00012369.1 | Mitotic spindle assembly checkpoint protein MAD2A                                | 7.727428675 |
| 165 | IPI00552360.2 | Isoform 1 of Fumarylacetoacetate hydrolase domain-containing protein 1           | 7.611097336 |
| 166 | IPI00012491.2 | Heat-stable enterotoxin receptor                                                 | 7.599328995 |
| 167 | IPI00911081.2 | glutaryl-CoA dehydrogenase                                                       | 7.570792198 |
| 168 | IPI00936634.1 | Isoform 3 of SH2 domain-containing protein 2A                                    | 7.549822807 |
| 169 | IPI00302176.5 | Isoform 1 of H/ACA ribonucleoprotein complex subunit 1                           | 7.544974566 |
| 170 | IPI00400975.1 | Conserved hypothetical protein                                                   | 7.460657597 |
| 171 | IPI00329352.4 | Nodal modulator 1                                                                | 7.442754984 |
| 172 | IPI00935307.2 | diaphanous homolog 1 (Drosophila)                                                | 7.417745352 |
| 173 | IPI00514944.5 | Uroporphyrinogen decarboxylase                                                   | 7.410956621 |
| 174 | IPI01014611.1 | cDNA, FLJ79139, highly similar to Alkyldihydroxyacetonephosphate synthase, per   | 7.407764673 |
| 175 | IPI01009451.1 | MYC-associated zinc finger protein (purine-binding transcription factor)         | 7.374407053 |
| 176 | IPI00908803.1 | cDNA FLJ59584, highly similar to Mitochondrial-processing peptidase alpha subu   | 7.355117321 |
| 177 | IPI01013039.1 | proteasome (prosome, macropain) 26S subunit, non-ATPase, 9                       | 7.351754189 |
| 178 | IPI00302673.3 | ATP synthase mitochondrial F1 complex assembly factor 1                          | 7.347349405 |
| 179 | IPI01008914.1 | eukaryotic initiation factor 4A-I isoform 2                                      | 7.327119589 |
| 180 | IPI00903226.1 | cDNA FLJ46359 fis, clone TEST14049786, highly similar to Hexokinase-1            | 7.286429644 |
| 181 | IPI00749044.2 | Similar to IQ motif and Sec7 domain 3                                            | 7.284358501 |
| 182 | IPI01011924.1 | ubiquitin specific peptidase 7 (herpes virus-associated)                         | 7.239362478 |
| 183 | IPI00219793.1 | Isoform 2 of Suppressor of SWI4 1 homolog                                        | 7.234596014 |
| 184 | IPI00001618.2 | Ras-related protein Rab-39A                                                      | 7.229089737 |
| 185 | IPI00005573.3 | Isoform 1 of 5'(3')-deoxyribonucleotidase, cytosolic type                        | 7.172768831 |
| 186 | IPI00940894.1 | DNA polymerase                                                                   | 7.069058895 |
| 187 | IPI00556204.1 | Eukaryotic translation elongation factor 1 alpha 2 variant (Fragment)            | 7.016174316 |

|     |               |                                                                                |             |
|-----|---------------|--------------------------------------------------------------------------------|-------------|
| 188 | IPI00552198.1 | Phosphoprotein enriched in astrocytes 15                                       | 7.014993906 |
| 189 | IPI00877618.1 | mercaptopyruvate sulfurtransferase                                             | 7.01315403  |
| 190 | IPI00177965.5 | 5'-nucleotidase domain-containing protein 1                                    | 7.002598286 |
| 191 | IPI00019385.4 | Translocon-associated protein subunit delta                                    | 6.980569601 |
| 192 | IPI00646415.1 | 20 kDa protein                                                                 | 6.970712662 |
| 193 | IPI00020771.3 | microtubule-associated protein 7                                               | 6.955245972 |
| 194 | IPI00043678.3 | dedicator of cytokinesis 7                                                     | 6.885029078 |
| 195 | IPI00646459.1 | Nuclear autoantigenic sperm protein                                            | 6.882386684 |
| 196 | IPI00645630.2 | enoyl-CoA hydratase domain-containing protein 1 isoform 3                      | 6.879080772 |
| 197 | IPI01009725.1 | cDNA FLJ58302, highly similar to Importin-4                                    | 6.818561792 |
| 198 | IPI00789806.2 | Isoform 2 of Cytosol aminopeptidase                                            | 6.78508997  |
| 199 | IPI00910150.1 | cDNA FLJ60107, highly similar to DNA replication complex GINS protein PSF1     | 6.754507303 |
| 200 | IPI00925176.1 | trafficking protein, kinesin binding 1                                         | 6.746781588 |
| 201 | IPI00743775.1 | Isoform 2 of Coiled-coil domain-containing protein 47                          | 6.72347331  |
| 202 | IPI00010157.1 | S-adenosylmethionine synthase isoform type-2                                   | 6.712624788 |
| 203 | IPI00171844.3 | COP9 signalosome complex subunit 4                                             | 6.679496765 |
| 204 | IPI00549307.3 | Isoform 3 of MOSC domain-containing protein 1, mitochondrial                   | 6.634622574 |
| 205 | IPI00157928.2 | maleylacetoacetate isomerase isoform 2                                         | 6.594398022 |
| 206 | IPI00894205.2 | protein NipSnap homolog 1 isoform 2                                            | 6.587986231 |
| 207 | IPI00922265.1 | Isoform 1 of Membrane magnesium transporter 1                                  | 6.58423233  |
| 208 | IPI00645291.1 | Isoform 2 of Phosphoribosyltransferase domain-containing protein 1             | 6.583433151 |
| 209 | IPI00296999.9 | ATP synthase mitochondrial F1 complex assembly factor 2                        | 6.480558157 |
| 210 | IPI00292168.3 | Histone chaperone ASF1A                                                        | 6.463583946 |
| 211 | IPI00291093.3 | DNA-directed RNA polymerases I, II, and III subunit RPABC1                     | 6.424916029 |
| 212 | IPI00447177.1 | Antigen MLAA-23                                                                | 6.394483566 |
| 213 | IPI00744932.1 | Similar to Zinc finger, DHHC-type containing 1                                 | 6.381577492 |
| 214 | IPI01013870.1 | N(alpha)-acetyltransferase 40, NatD catalytic subunit, homolog (S. cerevisiae) | 6.381153107 |
| 215 | IPI00878669.2 | chromobox homolog 1                                                            | 6.380673409 |
| 216 | IPI00007676.3 | Estradiol 17-beta-dehydrogenase 12 (present in G9a with azido)                 | 6.362389326 |
| 217 | IPI00797738.1 | Cytochrome c oxidase subunit 6B1                                               | 6.351295471 |
| 218 | IPI00221222.7 | Activated RNA polymerase II transcriptional coactivator p15                    | 6.34903574  |
| 219 | IPI00908651.1 | cDNA FLJ57726, highly similar to Heterogeneous nuclear ribonucleoprotein H3    | 6.290336847 |
| 220 | IPI00552365.7 | EF-hand domain family, member D2                                               | 6.279866457 |
| 221 | IPI00004454.3 | Isoform 1 of Dolichol-phosphate mannosyltransferase subunit 3                  | 6.272236586 |
| 222 | IPI00936328.2 | MARCKS-related protein-like, partial                                           | 6.246054411 |
| 223 | IPI01013456.1 | lactate dehydrogenase A                                                        | 6.22026968  |
| 224 | IPI00023748.3 | Nascent polypeptide-associated complex subunit alpha                           | 6.20839119  |
| 225 | IPI00964587.1 | DTW domain containing 2                                                        | 6.206987619 |
| 226 | IPI00013946.1 | Synaptogyrin-2                                                                 | 6.194886208 |
| 227 | IPI00514049.1 | Cytidine monophosphate (UMP-CMP) kinase 1, cytosolic                           | 6.14833951  |
| 228 | IPI00797616.2 | Isoform 3 of BRCA1-associated ATM activator 1                                  | 6.118052006 |
| 229 | IPI00024524.4 | RNA-binding protein PNO1                                                       | 6.095901728 |
| 230 | IPI01015706.1 | tumor protein, translationally-controlled 1                                    | 6.084853888 |
| 231 | IPI00916572.1 | ribosomal protein L31                                                          | 6.073718309 |
| 232 | IPI00644020.1 | Sterol O-acyltransferase 1                                                     | 6.061112404 |
| 233 | IPI00513717.3 | Isoform 2 of Chromodomain-helicase-DNA-binding protein 6                       | 6.06077528  |
| 234 | IPI00031032.1 | Musculin                                                                       | 6.05892539  |

|     |                |                                                                                     |             |
|-----|----------------|-------------------------------------------------------------------------------------|-------------|
| 235 | IPI00917386.1  | Sjogren syndrome antigen B (autoantigen La)                                         | 6.055042982 |
| 236 | IPI00908843.1  | cDNA FLJ53857, highly similar to Interferon-induced protein with tetra-tricopeptide | 5.990872145 |
| 237 | IPI00006408.4  | Nitric oxide synthase-interacting protein                                           | 5.941011667 |
| 238 | IPI00294486.1  | Dual specificity protein phosphatase 9                                              | 5.81464982  |
| 239 | IPI00063903.5  | Up-regulated during skeletal muscle growth protein 5                                | 5.796951056 |
| 240 | IPI01011610.1  | cDNA FLJ51181, highly similar to 7-dehydrocholesterol reductase                     | 5.796531439 |
| 241 | IPI00470515.7  | chromosome 1 open reading frame 173                                                 | 5.771541834 |
| 242 | IPI01015586.1  | glucosamine (N-acetyl)-6-sulfatase                                                  | 5.769265652 |
| 243 | IPI00889171.1  | Isoform 2 of Junction-mediating and -regulatory protein                             | 5.738581657 |
| 245 | IPI00007019.1  | Peptidyl-prolyl cis-trans isomerase-like 1                                          | 5.570055485 |
| 246 | IPI00011898.3  | Translation initiation factor eIF-2B subunit epsilon                                | 5.532426834 |
| 247 | IPI00008437.7  | Probable ribosome biogenesis protein RLP24                                          | 5.482391119 |
| 248 | IPI01011224.1  | REX2, RNA exonuclease 2 homolog ( <i>S. cerevisiae</i> )                            | 5.463126659 |
| 249 | IPI01015916.1  | RNA-binding region (RNP1, RRM) containing 2, isoform CRA_b                          | 5.447995663 |
| 250 | IPI00643288.1  | Pyrophosphatase (Inorganic) 1                                                       | 5.435631037 |
| 251 | IPI00980505.1  | copper chaperone for superoxide dismutase                                           | 5.379751444 |
| 252 | IPI00514094.3  | serine/threonine kinase 32C                                                         | 5.335237026 |
| 253 | IPI00018691.1  | Isoform 1 of 28S ribosomal protein S18a, mitochondrial                              | 5.301540852 |
| 254 | IPI00017972.3  | Zinc finger protein 703                                                             | 5.284733772 |
| 255 | IPI01009339.1  | paraspeckle component 1                                                             | 5.243271112 |
| 256 | IPI00008436.4  | DNA polymerase epsilon subunit 4                                                    | 5.213436604 |
| 257 | IPI00513941.3  | SAR1 homolog A ( <i>S. cerevisiae</i> )                                             | 5.192499161 |
| 258 | IPI01010811.1  | ATP synthase, H <sup>+</sup> transporting, mitochondrial Fo complex, subunit F2     | 5.147957802 |
| 259 | IPI01014702.1  | isovaleryl-CoA dehydrogenase                                                        | 5.099872589 |
| 260 | IPI00643597.2  | Isoform 2 of Transmembrane channel-like protein 2                                   | 5.091242552 |
| 261 | IPI00982452.1  | sortilin-related receptor, L(DLR class) A repeats containing                        | 5.085541248 |
| 262 | IPI00909685.1  | cDNA FLJ58965, highly similar to Nonspecific lipid-transfer protein                 | 5.044857502 |
| 263 | IPI00027729.1  | Casein kinase I isoform epsilon                                                     | 5.033119917 |
| 264 | IPI00985162.1  | nucleoporin 160kDa                                                                  | 4.960441113 |
| 265 | IPI00926401.1  | N-acylaminoacyl-peptide hydrolase                                                   | 4.955853939 |
| 266 | IPI00645702.1  | CTP synthase 2                                                                      | 4.95538187  |
| 267 | IPI00646381.1  | mitochondrial ribosomal protein L24                                                 | 4.934664011 |
| 268 | IPI00746752.2  | Isoform C of Bromodomain and WD repeat-containing protein 1                         | 4.899923325 |
| 269 | IPI01010215.1  | lysine (K)-specific demethylase 2B                                                  | 4.898071289 |
| 270 | IPI00640671.3  | Isoform 2 of Protein fantom                                                         | 4.881556988 |
| 271 | IPI00244111.10 | Isoform 3 of Type II inositol-1,4,5-trisphosphate 5-phosphatase                     | 4.875109196 |
| 272 | IPI00967388.1  | ribosomal protein S3A                                                               | 4.861042738 |
| 273 | IPI00977873.1  | cDNA FLJ61146, highly similar to Cellular nucleic acid-binding protein              | 4.855553627 |
| 274 | IPI00014301.3  | Oxidase (Cytochrome c) assembly 1-like                                              | 4.830379963 |
| 275 | IPI00644993.1  | AMT protein                                                                         | 4.754335403 |
| 276 | IPI00978059.1  | chromosome 11 open reading frame 83                                                 | 4.688630581 |
| 277 | IPI00642016.1  | crystallin, zeta (quinone reductase)                                                | 4.556134224 |
| 278 | IPI00926007.2  | FLJ00144 protein (Fragment)                                                         | 4.520941734 |
| 279 | IPI00220358.1  | Isoform 2 of Cas scaffolding protein family member 4                                | 4.520151138 |
| 280 | IPI01013546.1  | Hydroxymethylbilane synthase                                                        | 4.499036312 |
| 281 | IPI00218946.2  | Potassium/sodium hyperpolarization-activated cyclic nucleotide-gated channel        | 4.445723534 |
| 282 | IPI00902977.1  | Isoform 6 of Oxidation resistance protein 1                                         | 4.443925381 |

|     |                |                                                                                 |             |
|-----|----------------|---------------------------------------------------------------------------------|-------------|
| 283 | IPI00180408.8  | Myosin-15                                                                       | 4.442148209 |
| 284 | IPI00026516.1  | Succinyl-CoA:3-ketoacid-coenzyme A transferase 1, mitochondrial                 | 4.442061901 |
| 285 | IPI00983321.1  | SOGA family member 3                                                            | 4.439264774 |
| 286 | IPI01009113.1  | polymerase (RNA) II (DNA directed) polypeptide A, 220kDa                        | 4.437465191 |
| 287 | IPI00946286.1  | collagen alpha-3(VI) chain isoform 4 precursor                                  | 4.436850071 |
| 288 | IPI01015357.1  | ATP-binding cassette, sub-family B (MDR/TAP), member 9                          | 4.430781841 |
| 289 | IPI00032900.1  | BoLA-like protein 1                                                             | 4.410545349 |
| 290 | IPI01010160.1  | UPP1 protein                                                                    | 4.40027523  |
| 291 | IPI00061987.4  | uncharacterized LOC113230                                                       | 4.396100521 |
| 292 | IPI00976931.1  | apoptosis-inducing factor, mitochondrion-associated, 1                          | 4.378081322 |
| 293 | IPI00797067.2  | U2 snRNP-specific A' protein                                                    | 4.372718811 |
| 294 | IPI00976917.1  | hypothetical protein LOC144481 isoform 1                                        | 4.371304512 |
| 295 | IPI00646919.1  | transmembrane protein 38B                                                       | 4.367688656 |
| 296 | IPI00795241.1  | Isoform 2 of Enolase-phosphatase E1                                             | 4.339342117 |
| 297 | IPI00291669.3  | Ubiquitin-like domain-containing CTD phosphatase 1                              | 4.331799507 |
| 298 | IPI00964697.1  | adrenoceptor alpha 2C                                                           | 4.331721783 |
| 299 | IPI00926562.1  | wingless-type MMTV integration site family, member 10A                          | 4.290638924 |
| 300 | IPI00929228.1  | Isoform 2 of Tudor domain-containing protein 3                                  | 4.273125172 |
| 301 | IPI00333126.1  | Leucine-rich repeat-containing protein 56                                       | 4.271798134 |
| 302 | IPI00965978.1  | Uncharacterized protein                                                         | 4.250235081 |
| 303 | IPI00978253.1  | indoleamine 2,3-dioxygenase 1                                                   | 4.244541645 |
| 304 | IPI00942036.1  | centrosomal protein 170B                                                        | 4.241065502 |
| 305 | IPI00793594.1  | mediator complex subunit 24                                                     | 4.21948576  |
| 306 | IPI00300408.3  | Copper homeostasis protein cutC homolog                                         | 4.212116718 |
| 307 | IPI00909705.1  | cDNA FLJ57896, highly similar to Arylsulfatase A                                | 4.211012363 |
| 308 | IPI00978643.1  | transmembrane protein 41B isoform 2                                             | 4.194047928 |
| 309 | IPI00186395.11 | Putative methyltransferase-like protein LOC121952                               | 4.174588203 |
| 310 | IPI01011139.1  | golgi transport 1B                                                              | 4.172591209 |
| 311 | IPI00894231.1  | CAP-GLY domain containing linker protein family, member 4                       | 4.172104359 |
| 312 | IPI00169400.1  | Isoform 1 of 28S ribosomal protein S5, mitochondrial                            | 4.169184685 |
| 313 | IPI00925074.1  | BC1 (ubiquinol-cytochrome c reductase) synthesis-like                           | 4.164148331 |
| 314 | IPI00418599.2  | Arachidonate 5-lipoxygenase variant (Fragment)                                  | 4.131789207 |
| 315 | IPI00220716.2  | Isoform 2 of Putative RNA-binding protein 15                                    | 4.124369621 |
| 316 | IPI00973891.1  | NudC domain containing 2                                                        | 4.124117374 |
| 317 | IPI00847423.1  | Similar to Hematopoietic signal peptide-containing isoform 1                    | 4.120315075 |
| 318 | IPI01012850.1  | cDNA FLJ58265, highly similar to Ubiquitin-protein ligase BRE1B                 | 4.11916256  |
| 319 | IPI00976464.1  | Sjogren syndrome/scleroderma autoantigen 1                                      | 4.115839005 |
| 320 | IPI00796662.2  | cDNA FLJ57580, highly similar to Zinc finger protein 485                        | 4.115236282 |
| 321 | IPI00009111.1  | Trophoblast glycoprotein                                                        | 4.105669975 |
| 322 | IPI00908950.1  | Ribosomal protein L18                                                           | 4.073968887 |
| 323 | IPI01014744.1  | microsomal glutathione S-transferase 1                                          | 4.063024998 |
| 324 | IPI00942440.2  | cDNA FLJ53389, highly similar to Homo sapiens RAB GTPase activating protein 1 ( | 4.048054695 |
| 325 | IPI00017630.6  | Nuclear fragile X mental retardation-interacting protein 1                      | 4.046810627 |
| 326 | IPI00103471.3  | Selenoprotein M                                                                 | 4.043367386 |
| 327 | IPI00024976.5  | Mitochondrial import receptor subunit TOM22 homolog                             | 4.042171001 |
| 328 | IPI00917391.1  | Uncharacterized protein                                                         | 4.041543961 |
| 329 | IPI00785127.1  | Gm127 (Fragment)                                                                | 4.038759232 |



|     |                |                                                                                  |             |
|-----|----------------|----------------------------------------------------------------------------------|-------------|
| 330 | IPI00454905.4  | cDNA FLJ42124 fis, clone TEST12009477, weakly similar to TRICHOHYALIN            | 4.021264553 |
| 331 | IPI00879096.1  | SWI/SNF related, matrix associated, actin dependent regulator of chromatin, su   | 4.01543808  |
| 332 | IPI00973955.1  | voltage-dependent anion channel 3                                                | 3.995401144 |
| 333 | IPI00171123.4  | GATA zinc finger domain-containing protein 1                                     | 3.985080719 |
| 334 | IPI00947213.1  | phosphoribosyl pyrophosphate synthetase 2                                        | 3.976323605 |
| 335 | IPI00555927.2  | nudix (nucleoside diphosphate linked moietyX)-type motif 6                       | 3.956722021 |
| 336 | IPI00910237.1  | proteasome subunit beta type-5 isoform 2                                         | 3.952091217 |
| 337 | IPI00976591.1  | chromosome 8 open reading frame 82                                               | 3.939365864 |
| 338 | IPI00925558.1  | CCR4-NOT transcription complex, subunit 10                                       | 3.932148218 |
| 339 | IPI00909361.1  | solute carrier family 35, member F6                                              | 3.895539284 |
| 340 | IPI00910780.1  | cDNA FLJ56706, highly similar to Bcl-2 homologous antagonist/killer              | 3.895368576 |
| 341 | IPI00884448.1  | Isoform 1 of Zinc finger protein 862                                             | 3.870273113 |
| 342 | IPI00947310.1  | single-stranded DNA binding protein 1, mitochondrial                             | 3.845179558 |
| 343 | IPI00945908.1  | nitrilase family, member 2                                                       | 3.827937365 |
| 344 | IPI00925482.1  | cleavage and polyadenylation specific factor 4, 30kDa                            | 3.797110558 |
| 345 | IPI00217949.12 | Ubiquitin-conjugating enzyme E2 S                                                | 3.775313377 |
| 346 | IPI00647050.1  | RNA 3'-terminal phosphate cyclase                                                | 3.746369123 |
| 347 | IPI00014539.2  | Homeobox protein Hox-B9                                                          | 3.746046543 |
| 348 | IPI01015921.1  | cDNA FLJ55361, highly similar to Nucleolar protein 11                            | 3.741353989 |
| 349 | IPI00922900.1  | cDNA FLJ50656, highly similar to Surfeit locus protein 4                         | 3.731828213 |
| 350 | IPI00978191.1  | catenin (cadherin-associated protein), alpha 1, 102kDa                           | 3.726494074 |
| 351 | IPI00926978.1  | solute carrier family 25 (carnitine/acylcarnitine translocase), member 20        | 3.700134039 |
| 352 | IPI00329742.2  | Fumarylacetoacetate hydrolase domain-containing protein 2A                       | 3.688626528 |
| 353 | IPI00927280.1  | Sin3A-associated protein, 18kDa                                                  | 3.676407814 |
| 354 | IPI00555624.2  | RAB3GAP1 protein                                                                 | 3.675404549 |
| 355 | IPI00449201.2  | Isoform 2 of Ubiquitin-like-conjugating enzyme ATG3                              | 3.65760088  |
| 356 | IPI00922359.1  | Protein-L-isoaspartate O-methyltransferase                                       | 3.632962704 |
| 357 | IPI00305423.6  | Charged multivesicular body protein 6                                            | 3.618782759 |
| 358 | IPI00909111.1  | cDNA FLJ59179, highly similar to 39S ribosomal protein L9, mitochondrial         | 3.615469456 |
| 359 | IPI00908627.1  | cDNA FLJ59271, highly similar to Component of gems 4                             | 3.610473156 |
| 360 | IPI00984850.1  | Activation-induced cytidine deaminase                                            | 3.605342865 |
| 361 | IPI00031022.2  | Heat shock protein, 110 kDa                                                      | 3.593075514 |
| 362 | IPI00006092.1  | Phosphomannomutase 2                                                             | 3.558265448 |
| 363 | IPI00640997.1  | isopentenyl-diphosphate delta isomerase 1                                        | 3.542179108 |
| 364 | IPI00893179.1  | X-ray repair complementing defective repair in Chinese hamster cells 6           | 3.53842473  |
| 365 | IPI00983931.1  | non-SMC condensin II complex, subunit D3                                         | 3.53430891  |
| 366 | IPI00909384.1  | cDNA FLJ53505, highly similar to Chaperone-activity of bc1 complex-like, mitocho | 3.516098738 |
| 367 | IPI01012335.1  | TatD DNase domain containing 1                                                   | 3.515783548 |
| 368 | IPI00009466.9  | coiled-coil-helix-coiled-coil-helix domain-containing protein 2, mitochondrial-l | 3.490503073 |
| 369 | IPI00926034.1  | coiled-coil domain containing 12                                                 | 3.489398479 |
| 370 | IPI00645836.1  | esterase D                                                                       | 3.473929644 |
| 371 | IPI00792109.1  | coiled-coil domain containing 43                                                 | 3.465866327 |
| 372 | IPI00964365.1  | Annexin A5                                                                       | 3.459147692 |
| 373 | IPI00909718.1  | cDNA FLJ59809, highly similar to Bone marrow stromal antigen 2                   | 3.450926065 |
| 374 | IPI00009659.3  | Regulation of nuclear pre-mRNA domain-containing protein 1B                      | 3.447496653 |
| 375 | IPI00028376.1  | Mitochondrial import inner membrane translocase subunit Tim8 A                   | 3.438120604 |
| 376 | IPI00908328.1  | cDNA FLJ51585, moderately similar to Homo sapiens spindle pole body compone      | 3.432426691 |

|     |               |                                                                                  |             |
|-----|---------------|----------------------------------------------------------------------------------|-------------|
| 377 | IPI00478062.2 | transducin-like enhancer of split 2 (E(sp1) homolog, Drosophila)                 | 3.425706387 |
| 378 | IPI00964581.3 | cDNA FLJ53827, highly similar to Speckle-type POZ protein                        | 3.420134544 |
| 379 | IPI00967045.1 | basic transcription factor 3                                                     | 3.417832136 |
| 380 | IPI00001632.4 | Isoform 2 of Uncharacterized protein KIAA1522                                    | 3.405859947 |
| 381 | IPI00396617.1 | cDNA FLJ11699 fis, clone HEMBA1005047, highly similar to RAS-RELATED PROTEIN F   | 3.378495932 |
| 382 | IPI00412272.2 | SH3 domain-binding glutamic acid-rich-like protein 2                             | 3.369605064 |
| 383 | IPI00384116.3 | Isoform 2 of Phosphoenolpyruvate carboxykinase [GTP], mitochondrial              | 3.349629402 |
| 384 | IPI01011706.1 | Superoxide dismutase 1 (Fragment)                                                | 3.342024565 |
| 385 | IPI00871391.3 | X-ray repair complementing defective repair in Chinese hamster cells 5 (double   | 3.335588455 |
| 386 | IPI00302674.3 | coiled-coil domain containing 134                                                | 3.335077763 |
| 387 | IPI00644866.1 | cDNA FLJ12775 fis, clone NT2RP2001677                                            | 3.332522869 |
| 388 | IPI00549413.2 | Annexin A1                                                                       | 3.3319695   |
| 389 | IPI00304163.5 | cDNA FLJ57902, highly similar to Protein MYG1                                    | 3.321031094 |
| 390 | IPI01018329.1 | cDNA FLJ57316, highly similar to DNA mismatch repair protein Msh2                | 3.316637516 |
| 391 | IPI00385751.6 | cDNA FLJ52780, highly similar to Tissue alpha-L-fucosidase                       | 3.296418428 |
| 392 | IPI00965308.1 | GTPase activating protein (SH3 domain) binding protein 2                         | 3.28204298  |
| 393 | IPI00161196.3 | F-box/LRR-repeat protein 8                                                       | 3.275252819 |
| 394 | IPI00385021.1 | ubiquinol-cytochrome c reductase complex chaperone                               | 3.269675016 |
| 395 | IPI01015633.1 | ADP-ribosylation factor-like 6 interacting protein 1                             | 3.264163017 |
| 396 | IPI00903277.1 | cDNA FLJ32474 fis, clone SKNMC2000593, highly similar to Tumor necrosis factor r | 3.251574993 |
| 397 | IPI00023939.1 | Guanine nucleotide exchange factor MSS4                                          | 3.248258591 |
| 398 | IPI00976381.1 | casein kinase 1, alpha 1                                                         | 3.242902279 |
| 399 | IPI01011217.1 | Full-length cDNA clone CS0DC001Y007 of Neuroblastoma of Homo sapiens             | 3.239886045 |
| 400 | IPI00790053.1 | RFT1 homolog (S. cerevisiae)                                                     | 3.237701178 |
| 401 | IPI00015806.3 | Isoform 1 of General transcription factor 3C polypeptide 3                       | 3.234821081 |
| 402 | IPI01013001.1 | G protein-coupled receptor 89C                                                   | 3.234705448 |
| 403 | IPI00925720.1 | cleavage and polyadenylation specific factor 4, 30kDa                            | 3.232334614 |
| 404 | IPI00847495.2 | cDNA FLJ55640, highly similar to Coiled-coil domain-containing protein 21        | 3.232254744 |
| 405 | IPI00981963.1 | FSHD region gene 1                                                               | 3.232080936 |
| 406 | IPI00892665.1 | guanine nucleotide binding protein-like 1                                        | 3.211884499 |
| 407 | IPI00903024.1 | methylthioadenosine phosphorylase                                                | 3.206659317 |
| 408 | IPI00852874.1 | SEC13 homolog (S. cerevisiae)                                                    | 3.198170185 |
| 409 | IPI00640938.1 | RNA binding protein, autoantigenic                                               | 3.198057652 |
| 410 | IPI00027487.3 | Creatine kinase M-type                                                           | 3.193926573 |
| 411 | IPI00879828.1 | Isoform 2 of DIS3-like exonuclease 1                                             | 3.189982891 |
| 412 | IPI00384120.1 | Full-length cDNA 5-PRIME end of clone CS0DI052YD12 of Placenta of Homo sapie     | 3.184959173 |
| 413 | IPI00332071.4 | Isoform 1 of Tether containing UBX domain for GLUT4                              | 3.180494785 |
| 414 | IPI00940222.2 | Isoform 3 of A-kinase anchor protein 12                                          | 3.180082798 |
| 415 | IPI00917463.1 | Isoform 3 of Ancient ubiquitous protein 1                                        | 3.17835784  |
| 416 | IPI00217465.5 | Histone H1.2                                                                     | 3.168960571 |
| 417 | IPI00911013.1 | cDNA FLJ57175, moderately similar to Pituitary tumor-transforming gene 1 protei  | 3.165185452 |
| 418 | IPI00106491.3 | mRNA turnover protein 4 homolog                                                  | 3.163933516 |
| 419 | IPI00925162.1 | transferrin receptor (p90, CD71)                                                 | 3.161654949 |
| 420 | IPI00909338.2 | lysosome membrane protein 2                                                      | 3.15091753  |
| 421 | IPI00155466.7 | succinate-CoA ligase, GDP-forming, beta subunit                                  | 3.147031069 |
| 422 | IPI01014601.1 | aminopeptidase puromycin sensitive                                               | 3.144531012 |
| 423 | IPI00878073.1 | migration and invasion enhancer 1                                                | 3.144301653 |

|     |               |                                                                                    |             |
|-----|---------------|------------------------------------------------------------------------------------|-------------|
| 424 | IPI00413614.3 | Isoform 2 of Symplekin                                                             | 3.137643576 |
| 425 | IPI00446667.1 | cDNA FLJ41384 fis, clone BRCAN2014602, moderately similar to DIACYLGLYCEROL K      | 3.132920265 |
| 426 | IPI00183065.6 | coiled-coil and C2 domain containing 1A                                            | 3.12879324  |
| 427 | IPI00894209.1 | Isoform 8 of Inhibitor of growth protein 4                                         | 3.127731085 |
| 428 | IPI01018135.1 | cDNA FLJ39696 fis, clone SMINT2011033, highly similar to Sorting and assembly m    | 3.12726903  |
| 429 | IPI00012313.3 | Golgi phosphoprotein 3-like                                                        | 3.105096102 |
| 430 | IPI00916612.1 | gamma-glutamylcyclotransferase isoform 4                                           | 3.096665859 |
| 431 | IPI00328390.2 | Isoform 1 of Polycomb group RING finger protein 5                                  | 3.09583354  |
| 432 | IPI00383290.1 | leucyl-tRNA synthetase                                                             | 3.094269037 |
| 433 | IPI00332157.2 | 39S ribosomal protein L54, mitochondrial                                           | 3.093358755 |
| 434 | IPI00966017.1 | chromosome 5 open reading frame 24                                                 | 3.079425335 |
| 435 | IPI00922210.1 | cDNA FLJ52564, moderately similar to Zinc finger protein 346                       | 3.079051018 |
| 436 | IPI01011569.1 | cDNA, FLJ78951, highly similar to Creatine kinase, ubiquitous mitochondrial        | 3.063862324 |
| 437 | IPI00019269.3 | WD repeat-containing protein 61                                                    | 3.061416388 |
| 438 | IPI00983408.1 | transforming growth factor, beta receptor III                                      | 3.056727171 |
| 439 | IPI00927046.1 | epithelial cell transforming sequence 2 oncogene                                   | 3.054199457 |
| 440 | IPI00910126.1 | cDNA FLJ59119, highly similar to Receptor expression-enhancing protein 6           | 3.046956062 |
| 441 | IPI00935818.1 | adenosylhomocysteinase isoform 2                                                   | 3.045629501 |
| 442 | IPI00797997.2 | 5-formyltetrahydrofolate cyclo-ligase isoform b                                    | 3.045045376 |
| 443 | IPI00980553.1 | cDNA FLJ50204, highly similar to 2,4-dienoyl-CoA reductase, mitochondrial          | 3.035377979 |
| 444 | IPI00908957.1 | cDNA FLJ61419, highly similar to RalA-binding protein 1                            | 3.023126841 |
| 445 | IPI00395401.3 | Isoform 3 of Cdc42-interacting protein 4                                           | 3.016060829 |
| 446 | IPI00216508.3 | Isoform 2 of Sorting nexin-3                                                       | 3.014677763 |
| 447 | IPI00019487.3 | Probable 7,8-dihydro-8-oxoguanine triphosphatase NUDT15                            | 3.005639315 |
| 448 | IPI00927053.2 | 26S protease regulatory subunit 7 2                                                | 3.003509283 |
| 449 | IPI00168442.5 | FAM75-like protein C9orf79                                                         | 3.003401756 |
| 450 | IPI00954159.1 | Isoform 1 of Protein ELYS                                                          | 2.998862505 |
| 451 | IPI00970906.1 | Isoform 1 of Transcription elongation factor A N-terminal and central domain-co    | 2.997951031 |
| 452 | IPI00644228.1 | cDNA FLJ52965, highly similar to Uridine-cytidine kinase 1                         | 2.992982388 |
| 453 | IPI00878538.1 | signal transducer and activator of transcription 5A                                | 2.991655588 |
| 454 | IPI00001835.3 | Zinc finger and BTB domain-containing protein 4                                    | 2.986486912 |
| 455 | IPI00030296.6 | Eukaryotic translation initiation factor 4A, isoform 2, isoform CRA_b              | 2.980415583 |
| 456 | IPI00292393.5 | Sodium channel protein type 4 subunit alpha                                        | 2.980061769 |
| 457 | IPI01011145.1 | OTU domain, ubiquitin aldehyde binding 1                                           | 2.975468874 |
| 458 | IPI00983405.1 | lin-7 homolog C (C. elegans)                                                       | 2.975069761 |
| 459 | IPI00910998.1 | cDNA FLJ51306, highly similar to Homo sapiens citrate lyase beta like (CLYBL), tra | 2.962366104 |
| 460 | IPI00397801.4 | Filaggrin-2                                                                        | 2.959728479 |
| 461 | IPI00926172.1 | WD repeat domain 12                                                                | 2.95571661  |
| 462 | IPI00298139.5 | cDNA FLJ39639 fis, clone SMINT2003340                                              | 2.954498768 |
| 463 | IPI00748303.3 | zinc finger RNA binding protein                                                    | 2.952274323 |
| 464 | IPI00001830.1 | Heterochromatin-specific nonhistone protein (Fragment)                             | 2.950314045 |
| 465 | IPI00908894.1 | cDNA FLJ57473, highly similar to Ribonuclease P protein subunit p29                | 2.948116064 |
| 466 | IPI01009115.1 | N-acetylglucosamine kinase                                                         | 2.947503805 |
| 467 | IPI00556611.1 | 39S ribosomal protein L22, mitochondrial isoform b                                 | 2.935769081 |
| 468 | IPI00449669.2 | Isoform 2 of Translocon-associated protein subunit alpha                           | 2.932744741 |
| 469 | IPI00967585.1 | guanine nucleotide binding protein (G protein), beta polypeptide 2-like 1          | 2.930656672 |
| 470 | IPI00791495.2 | HLA-B associated transcript 1                                                      | 2.927881479 |

|     |               |                                                                                    |             |
|-----|---------------|------------------------------------------------------------------------------------|-------------|
| 471 | IPI00785036.8 | nuclear GTPase, germinal center associated                                         | 2.927058935 |
| 472 | IPI00216529.1 | Isoform E of Plasma membrane calcium-transporting ATPase 1                         | 2.924975872 |
| 473 | IPI00219669.5 | Carbonic anhydrase-related protein                                                 | 2.921352863 |
| 474 | IPI00480049.2 | Isoform B of Inositol polyphosphate 5-phosphatase OCRL-1                           | 2.917422295 |
| 475 | IPI00641749.2 | Isoform 1 of Janus kinase and microtubule-interacting protein 3                    | 2.914739132 |
| 476 | IPI00946474.1 | NADH dehydrogenase (ubiquinone) 1 alpha subcomplex, 5, 13kDa                       | 2.913308382 |
| 477 | IPI00977662.1 | Parkinson disease 7 domain containing 1                                            | 2.913131475 |
| 478 | IPI00307665.4 | Isoform 1 of Zinc finger protein 518A                                              | 2.90212512  |
| 479 | IPI00975554.1 | protein tyrosine phosphatase type IVA, member 2                                    | 2.90075922  |
| 480 | IPI00977503.1 | midline-1 isoform 5                                                                | 2.899876595 |
| 481 | IPI00981929.2 | cDNA FLJ33978 fis, clone DFNES2004354, highly similar to Inhibitor of nuclear fact | 2.894971848 |
| 482 | IPI00022426.1 | Protein AMBP                                                                       | 2.892508745 |
| 483 | IPI00797343.2 | coiled-coil domain containing 117                                                  | 2.888273001 |
| 484 | IPI00296219.4 | Glutaminase liver isoform, mitochondrial                                           | 2.885802031 |
| 485 | IPI00894139.1 | golgi to ER traffic protein 4 homolog (S. cerevisiae)                              | 2.883171082 |
| 486 | IPI00910017.1 | cDNA FLJ54153, weakly similar to Homo sapiens Mof4 family associated protein       | 2.88300252  |
| 487 | IPI00220147.1 | Isoform 3 of Pantothenate kinase 1                                                 | 2.88271594  |
| 488 | IPI00031650.3 | Isoform 1 of Protein syndesmos                                                     | 2.873019934 |
| 489 | IPI00298409.3 | Phosducin-like protein                                                             | 2.870197058 |
| 490 | IPI00910019.2 | Major vault protein                                                                | 2.869003296 |
| 491 | IPI01009997.1 | cDNA FLJ51981, highly similar to Histone deacetylase 1                             | 2.865437031 |
| 492 | IPI00985171.1 | proteoglycan 4                                                                     | 2.86326766  |
| 493 | IPI00028078.1 | Isoform A of Potassium channel subfamily K member 10                               | 2.862164259 |
| 494 | IPI01013425.1 | cDNA FLJ45045 fis, clone BRAWH3021580, highly similar to Restin                    | 2.858755589 |
| 495 | IPI00643380.2 | chromosome 18 open reading frame 8                                                 | 2.857409954 |
| 496 | IPI00893403.1 | exportin 1 (CRM1 homolog, yeast)                                                   | 2.856910229 |
| 497 | IPI00179408.3 | Tetratricopeptide repeat protein 9C                                                | 2.856591225 |
| 498 | IPI00005740.1 | Neighbor of COX4                                                                   | 2.854933977 |
| 499 | IPI00908538.1 | arginine and glutamate rich 1                                                      | 2.851033449 |
| 500 | IPI00922399.1 | cDNA FLJ57937, highly similar to DNA-directed RNA polymerase II 33 kDa polypep     | 2.848650932 |
| 501 | IPI00384047.1 | Isoform 1 of Trafficking protein particle complex subunit 6B                       | 2.843178988 |
| 502 | IPI00894369.1 | neuroblastoma amplified sequence                                                   | 2.830990076 |
| 503 | IPI00927360.1 | nuclear receptor subfamily 4, group A, member 2                                    | 2.830797911 |
| 504 | IPI00432753.2 | Isoform 1 of Torsin-2A                                                             | 2.830038071 |
| 505 | IPI00011865.2 | Isoform 2 of Platelet-derived growth factor D                                      | 2.824905634 |
| 506 | IPI00946064.1 | geranylgeranyl diphosphate synthase 1                                              | 2.824784279 |
| 507 | IPI01011129.1 | cDNA FLJ38453 fis, clone FEBRA2019663, highly similar to Homo sapiens DEAD (As     | 2.811005831 |
| 508 | IPI01012915.1 | cDNA FLJ53462, highly similar to Transcription intermediary factor 1-alpha         | 2.80894351  |
| 509 | IPI00651702.1 | SATB2 protein                                                                      | 2.80437851  |
| 510 | IPI00909427.1 | cDNA FLJ59384, highly similar to Striatin-4                                        | 2.804109097 |
| 511 | IPI00103004.4 | Isoform 2 of Intracellular hyaluronan-binding protein 4                            | 2.80377388  |
| 512 | IPI00307805.5 | Growth arrest and DNA damage-inducible protein GADD45 beta                         | 2.800504923 |
| 513 | IPI00219898.1 | Isoform 2 of Nephrin                                                               | 2.794588804 |
| 514 | IPI00894394.1 | Isoform 4 of Immunoglobulin-like and fibronectin type III domain-containing pr     | 2.789975643 |
| 515 | IPI00013706.5 | 39S ribosomal protein L20, mitochondrial                                           | 2.773723125 |
| 516 | IPI00290764.5 | Isoform 2 of Chronic lymphocytic leukemia deletion region gene 6 protein           | 2.770787239 |
| 517 | IPI00748058.1 | Isoform 2 of SH3 and cysteine-rich domain-containing protein 3                     | 2.77041173  |

|     |               |                                                   |             |
|-----|---------------|---------------------------------------------------|-------------|
| 518 | IPI00396551.3 | Isoform 2 of RAD51-associated protein 1           | 2.768308878 |
| 519 | IPI00552983.6 | Protein of unknown function DUF634 family protein | 2.762229204 |
| 520 | IPI00002535.2 | Peptidyl-prolyl cis-trans isomerase FKBP2         | 2.761423111 |
| 521 | IPI00554560.4 | chromosome 16 open reading frame 88               | 2.757285118 |
| 522 | IPI00646520.1 | non-POU domain containing, octamer-binding        | 2.753503561 |
| 523 | IPI00984596.1 | leucine-rich repeats and IQ motif containing 1    | 2.752708912 |
| 524 | IPI01011419.1 | ATP9B protein                                     | 2.711783409 |
| 525 | IPI00966190.2 | SFRS protein kinase 1                             | 2.696774483 |

**Table S3.** BPPM-revealed potential nonhistone targets of EuHMT2 in HEK293T cells with the EuHMT21-Y1154A mutant and Hey-SAM 6 as BPPM reagents. These proteins are not present in the control (empty-vector transfected HEK293T cells).

| Serial | Accession     | Description                                                                      | Score of EuHMT2 |
|--------|---------------|----------------------------------------------------------------------------------|-----------------|
| 1      | IPI00296337.2 | Isoform 1 of DNA-dependent protein kinase catalytic subunit                      | 683.7383871     |
| 2      | IPI00220795.4 | Isoform 2 of Histone-lysine N-methyltransferase EHMT2                            | 466.1512184     |
| 3      | IPI00302592.2 | Isoform 2 of Filamin-A                                                           | 207.2757595     |
| 4      | IPI00909140.9 | cDNA FLJ56903, highly similar to Tubulin beta-7 chain                            | 134.9918664     |
| 5      | IPI00024279.4 | HEAT repeat-containing protein 1                                                 | 120.841238      |
| 6      | IPI00883857.2 | Isoform Long of Heterogeneous nuclear ribonucleoprotein U                        | 118.6945181     |
| 7      | IPI00006482.1 | Isoform Long of Sodium/potassium-transporting ATPase subunit alpha-1             | 108.9071741     |
| 8      | IPI00414482.3 | Isoform 1 of General transcription factor 3C polypeptide 1                       | 108.9063585     |
| 9      | IPI00893062.1 | X-ray repair complementing defective repair in Chinese hamster cells 6           | 98.84765005     |
| 10     | IPI00790636.1 | HLA-B associated transcript 1                                                    | 91.60756612     |
| 11     | IPI01018179.1 | Isoform 4 of Interleukin enhancer-binding factor 3                               | 91.36282182     |
| 12     | IPI00216049.1 | Isoform 1 of Heterogeneous nuclear ribonucleoprotein K                           | 88.98906755     |
| 13     | IPI00293464.5 | DNA damage-binding protein 1                                                     | 81.18342185     |
| 14     | IPI00402182.2 | Isoform 2 of Heterogeneous nuclear ribonucleoprotein Q                           | 74.11966062     |
| 15     | IPI00026202.1 | 60S ribosomal protein L18a                                                       | 70.69340944     |
| 16     | IPI00010204.1 | Serine/arginine-rich splicing factor 3                                           | 66.33425546     |
| 17     | IPI00894141.2 | DNA-directed RNA polymerase                                                      | 65.24241805     |
| 18     | IPI00030275.5 | Heat shock protein 75 kDa, mitochondrial                                         | 59.69980907     |
| 19     | IPI01015236.1 | cDNA FLJ52378, highly similar to Tubulin beta-7 chain                            | 58.46184039     |
| 20     | IPI01014074.1 | cDNA FLJ53296, highly similar to Serine/threonine-protein phosphatase 2A 65 kDa  | 58.19350886     |
| 21     | IPI00745272.3 | Isoform 2 of Glyoxalase domain-containing protein 4                              | 57.74798656     |
| 22     | IPI00646899.2 | ribosomal protein L10                                                            | 57.57459235     |
| 23     | IPI00892976.1 | Euchromatic histone-lysine N-methyltransferase 2                                 | 57.4455924      |
| 24     | IPI00550451.1 | Serine/threonine-protein phosphatase PP1-alpha catalytic subunit                 | 56.66304755     |
| 25     | IPI00301109.4 | Isoform 1 of Inorganic pyrophosphatase 2, mitochondrial                          | 54.79612994     |
| 26     | IPI00026625.1 | Isoform 1 of Nuclear pore complex protein Nup155                                 | 53.59179616     |
| 27     | IPI00299608.3 | Isoform 1 of 26S proteasome non-ATPase regulatory subunit 1                      | 52.03631973     |
| 28     | IPI00017617.1 | Probable ATP-dependent RNA helicase DDX5                                         | 51.95726752     |
| 29     | IPI00003348.3 | Guanine nucleotide-binding protein G(I)/G(S)/G(T) subunit beta-2                 | 50.74977994     |
| 30     | IPI00939492.2 | HLA-B associated transcript 8 BAT8 isoform a variant (Fragment)                  | 50.66032219     |
| 31     | IPI00003964.4 | Isoform 2 of Probable ubiquitin carboxyl-terminal hydrolase FAF-X                | 50.29524088     |
| 32     | IPI00291755.6 | Isoform 1 of Nuclear pore membrane glycoprotein 210                              | 49.22668934     |
| 33     | IPI01015522.1 | cDNA FLJ55253, highly similar to Actin, cytoplasmic 1                            | 47.32136416     |
| 34     | IPI00784332.4 | Similar to Tubulin alpha-3C/D chain                                              | 47.26412559     |
| 35     | IPI00064328.3 | protein arginine N-methyltransferase 5 isoform b                                 | 46.35761309     |
| 36     | IPI00647102.4 | cDNA FLJ42590 fis, clone BRACE3009708, highly similar to Sodium/potassium-transp | 45.72382426     |
| 37     | IPI00604620.3 | Nucleolin                                                                        | 45.58505511     |
| 38     | IPI00216530.1 | Isoform K of Plasma membrane calcium-transporting ATPase 1                       | 45.45633245     |
| 39     | IPI00940257.2 | cDNA FLJ52362, highly similar to T-complex protein 1 subunit epsilon             | 45.03963923     |
| 40     | IPI00793930.1 | TUBA1B protein                                                                   | 44.1114819      |
| 41     | IPI00642042.3 | Putative uncharacterized protein DKFZp686J1372                                   | 43.91723847     |
| 42     | IPI00965271.1 | small subunit processome component 20 homolog                                    | 42.85621881     |
| 43     | IPI00983023.1 | phosphoglycerate mutase 1-like                                                   | 42.1787138      |
| 44     | IPI00964983.1 | ribosomal protein S3A                                                            | 41.65900421     |
| 45     | IPI00796337.1 | poly(rC)-binding protein 2 isoform a                                             | 41.27402925     |
| 46     | IPI01013547.1 | cystathionine-beta-synthase                                                      | 40.56543255     |

|    |               |                                                                                   |             |
|----|---------------|-----------------------------------------------------------------------------------|-------------|
| 47 | IPI00472939.3 | Signal peptidase complex subunit 2                                                | 40.41459775 |
| 48 | IPI00171438.2 | Thioredoxin domain-containing protein 5                                           | 39.3563168  |
| 49 | IPI00456429.3 | Ubiquitin-60S ribosomal protein L40                                               | 38.90302277 |
| 50 | IPI00013891.1 | Isoform Long of Transformer-2 protein homolog alpha                               | 37.85644484 |
| 51 | IPI00903323.1 | cDNA FLJ38640 fis, clone HHDPC2003472, highly similar to CHLORIDE INTRACELLULAR   | 35.82258964 |
| 52 | IPI00646721.1 | Ubiquitin carboxyl-terminal hydrolase                                             | 35.46411991 |
| 53 | IPI00787827.1 | Isoform 2 of Presequence protease, mitochondrial                                  | 33.91579771 |
| 54 | IPI00446235.2 | Isoform 2 of NADH-cytochrome b5 reductase 3                                       | 33.31059861 |
| 55 | IPI00166293.5 | Histone H2B type 3-B                                                              | 32.30172586 |
| 56 | IPI00304417.7 | Isocitrate dehydrogenase [NAD] subunit beta, mitochondrial precursor              | 32.26378059 |
| 57 | IPI01014975.1 | Talin 1                                                                           | 31.65581322 |
| 58 | IPI01018004.1 | 3'(2'), 5'-bisphosphate nucleotidase 1                                            | 31.31366825 |
| 59 | IPI00099986.5 | Ketosamine-3-kinase                                                               | 31.07059574 |
| 60 | IPI00005719.1 | Isoform 1 of Ras-related protein Rab-1A                                           | 30.42552304 |
| 61 | IPI00306048.5 | Isoform 1 of ATPase family AAA domain-containing protein 3B                       | 30.22437739 |
| 62 | IPI00220487.4 | Isoform 1 of ATP synthase subunit d, mitochondrial                                | 29.69207406 |
| 63 | IPI00294701.1 | CDK-activating kinase assembly factor MAT1                                        | 28.72710562 |
| 64 | IPI00297492.2 | Dolichyl-diphosphooligosaccharide--protein glycosyltransferase subunit STT3A      | 28.56105924 |
| 65 | IPI00154473.5 | Isoform 1 of Elongation factor G, mitochondrial                                   | 28.23124099 |
| 66 | IPI00031627.4 | DNA-directed RNA polymerase II subunit RPB1                                       | 27.87834454 |
| 67 | IPI00908647.1 | cDNA FLJ59942, highly similar to Prostaglandin E synthase 3                       | 27.80573511 |
| 68 | IPI00011307.4 | Bifunctional methylenetetrahydrofolate dehydrogenase/cyclohydrolase, mitochond    | 27.65156341 |
| 69 | IPI00008485.1 | Cytoplasmic aconitate hydratase                                                   | 27.61344528 |
| 70 | IPI00328985.1 | Isoform 1 of THO complex subunit 6 homolog                                        | 27.59589958 |
| 71 | IPI00384456.4 | Isoform GTBP-N of DNA mismatch repair protein Msh6                                | 27.50466967 |
| 72 | IPI00032304.2 | Plastin-1                                                                         | 27.36275649 |
| 73 | IPI00335130.5 | mitochondrial ribosomal protein L37                                               | 27.21831703 |
| 74 | IPI00018288.1 | DNA-directed RNA polymerase II subunit RPB3                                       | 26.89926624 |
| 75 | IPI01010848.1 | Methionine aminopeptidase                                                         | 26.41838145 |
| 76 | IPI00946054.3 | Isoform 3 of Histone-lysine N-methyltransferase EHMT1                             | 25.92109776 |
| 77 | IPI00472054.2 | Isoform A of Constitutive coactivator of PPAR-gamma-like protein 1                | 25.78061318 |
| 78 | IPI00924935.1 | cDNA FLJ57106, highly similar to Transferrin receptor protein 1                   | 24.9913497  |
| 79 | IPI00168209.3 | DTW domain-containing protein 2                                                   | 24.76762366 |
| 80 | IPI00032849.2 | Nucleolar protein 16                                                              | 24.5403409  |
| 81 | IPI00983716.1 | ubiquitin protein ligase E3 component n-recognin 5                                | 24.53851151 |
| 82 | IPI00418202.2 | pyridoxal (pyridoxine, vitamin B6) kinase                                         | 24.44453502 |
| 83 | IPI00305978.4 | Aflatoxin B1 aldehyde reductase member 2                                          | 24.39702511 |
| 84 | IPI00217975.4 | Lamin-B1                                                                          | 24.35361624 |
| 85 | IPI00010845.3 | NADH dehydrogenase [ubiquinone] iron-sulfur protein 8, mitochondrial              | 24.22619653 |
| 86 | IPI00926412.1 | Transformation/transcription domain-associated protein variant                    | 23.87043071 |
| 87 | IPI00032872.3 | 28S ribosomal protein S16, mitochondrial                                          | 23.81681204 |
| 88 | IPI00843975.1 | Ezrin                                                                             | 23.72064447 |
| 89 | IPI00915022.2 | Isoform 1 of THO complex subunit 2                                                | 23.37501526 |
| 90 | IPI00909083.1 | eukaryotic peptide chain release factor GTP-binding subunit ERF3A isoform 2       | 23.2077117  |
| 91 | IPI00927876.1 | polymerase (RNA) II (DNA directed) polypeptide H                                  | 23.01699042 |
| 92 | IPI00926706.1 | actin related protein 2/3 complex, subunit 1A, 41kDa                              | 22.53975105 |
| 93 | IPI00975963.1 | eukaryotic translation elongation factor 1 delta (guanine nucleotide exchange pro | 22.28946233 |

|     |                |                                                                                    |             |
|-----|----------------|------------------------------------------------------------------------------------|-------------|
| 94  | IPI00975850.1  | ribosomal protein L8                                                               | 22.23127723 |
| 95  | IPI00641040.1  | esterase D                                                                         | 22.21193528 |
| 96  | IPI00000792.1  | Quinone oxidoreductase                                                             | 22.15558577 |
| 97  | IPI00009607.1  | Ras-related protein Rap-2c                                                         | 22.08097172 |
| 98  | IPI00410017.1  | Isoform 2 of Polyadenylate-binding protein 1                                       | 21.9293642  |
| 99  | IPI00217992.1  | Isoform 3 of Dystonin                                                              | 21.92004824 |
| 100 | IPI00339385.1  | Isoform 2 of Retinol dehydrogenase 11                                              | 21.70267034 |
| 101 | IPI00333985.2  | Isoform 2 of Nodal modulator 2                                                     | 21.68538427 |
| 102 | IPI00465022.9  | Isoform 2 of Structural maintenance of chromosomes flexible hinge domain-conta     | 21.6378448  |
| 103 | IPI00037070.3  | heat shock 70kDa protein 8                                                         | 21.34835196 |
| 104 | IPI00414860.6  | 60S ribosomal protein L37a                                                         | 21.27662992 |
| 105 | IPI01016026.1  | cDNA FLJ53202, highly similar to Exportin-2                                        | 21.27041531 |
| 106 | IPI00305258.4  | Isoform 1 of MOSC domain-containing protein 1, mitochondrial                       | 21.26810241 |
| 107 | IPI01014700.1  | cDNA FLJ51193, highly similar to DNA mismatch repair protein Msh2                  | 21.0701077  |
| 108 | IPI01010578.1  | cytoplasmic FMR1 interacting protein 2                                             | 21.02910089 |
| 109 | IPI00295992.4  | Isoform 2 of ATPase family AAA domain-containing protein 3A                        | 20.9871881  |
| 110 | IPI00301204.2  | Isoform 1 of Retinol dehydrogenase 13                                              | 20.79895854 |
| 111 | IPI01013219.1  | prohibitin 2                                                                       | 20.71885967 |
| 112 | IPI00328815.4  | Isoform 1 of Ubiquitin carboxyl-terminal hydrolase 48                              | 20.68755722 |
| 113 | IPI00056494.5  | 60S ribosomal protein L36a-like                                                    | 19.84472513 |
| 114 | IPI00182757.10 | Isoform 1 of Protein KIAA1967                                                      | 19.83158898 |
| 115 | IPI00967041.1  | Ubiquitin carrier protein                                                          | 19.72968006 |
| 116 | IPI00293260.5  | Isoform 1 of DnaJ homolog subfamily C member 10                                    | 19.13160372 |
| 117 | IPI01011635.1  | CDC10 protein variant (Fragment)                                                   | 19.08216    |
| 118 | IPI00748807.2  | Isoform 1 of Nuclear pore complex protein Nup160                                   | 19.02867842 |
| 119 | IPI01014189.1  | MYC binding protein 2                                                              | 18.75863028 |
| 120 | IPI00157908.4  | Isoform 3 of Apoptosis-inducing factor 1, mitochondrial                            | 18.59455872 |
| 121 | IPI00844172.1  | Myosin                                                                             | 18.58733106 |
| 122 | IPI00295889.2  | Signal recognition particle 19 kDa protein                                         | 18.56547809 |
| 123 | IPI00980391.2  | cDNA FLJ54047, highly similar to Alpha-1 catenin                                   | 18.41666961 |
| 124 | IPI00014213.1  | Probable leucyl-tRNA synthetase, mitochondrial                                     | 18.35570359 |
| 125 | IPI00027699.2  | Proteasome (Prosome, macropain) 26S subunit, non-ATPase, 10                        | 18.28348708 |
| 126 | IPI00885106.1  | Similar to Transmembrane 9 superfamily member 4 precursor                          | 18.13494015 |
| 127 | IPI00420108.6  | Dihydrolipoyllysine-residue succinyltransferase component of 2-oxoglutarate deh    | 18.09095812 |
| 128 | IPI00514701.1  | Isoform 2 of Mitotic checkpoint protein BUB3                                       | 17.8680315  |
| 129 | IPI00903112.1  | cDNA FLJ36533 fis, clone TRACH2004428, highly similar to Lactotransferrin (Fragmen | 17.33468866 |
| 130 | IPI00890827.1  | Isoform 2 of Serine/threonine-protein phosphatase 6 catalytic subunit              | 17.32423234 |
| 131 | IPI00215888.4  | Signal recognition particle 72 kDa protein                                         | 17.1121819  |
| 132 | IPI00619903.3  | Isoform 2 of UDP-glucose:glycoprotein glucosyltransferase 1                        | 16.92570233 |
| 133 | IPI00902914.2  | transmembrane 9 superfamily member 2                                               | 16.88384128 |
| 134 | IPI00299254.4  | Eukaryotic translation initiation factor 5B                                        | 16.79346323 |
| 135 | IPI01012145.1  | Hydroxymethylbilane synthase                                                       | 16.78157663 |
| 136 | IPI00908696.2  | ADP-ribosylation-like factor 6 interacting protein 5                               | 16.75019765 |
| 137 | IPI00788781.1  | fatty acid binding protein 5 (psoriasis-associated)                                | 16.7113061  |
| 138 | IPI01014596.1  | ubiquitin C                                                                        | 16.70653343 |
| 139 | IPI00019329.1  | Dynein light chain 1, cytoplasmic                                                  | 16.70442867 |
| 140 | IPI00884904.1  | Isoform 3 of Protein AHNK2                                                         | 16.68552947 |



|     |                |                                                                                        |             |
|-----|----------------|----------------------------------------------------------------------------------------|-------------|
| 141 | IPI00295427.5  | Isoform 1 of 39S ribosomal protein L39, mitochondrial                                  | 16.68056345 |
| 142 | IPI00946099.1  | sorcin                                                                                 | 16.52582979 |
| 143 | IPI00640401.1  | ATPase, Na <sup>+</sup> /K <sup>+</sup> transporting, alpha 2 (+) polypeptide          | 16.52371335 |
| 144 | IPI00645329.1  | Isoform 3 of Histone-binding protein RBBP4                                             | 16.43619323 |
| 145 | IPI00020557.2  | Prolow-density lipoprotein receptor-related protein 1                                  | 16.39069438 |
| 146 | IPI00006252.3  | Aminoacyl tRNA synthase complex-interacting multifunctional protein 1                  | 16.3434124  |
| 147 | IPI00658000.3  | Isoform 1 of Insulin-like growth factor 2 mRNA-binding protein 3                       | 16.23186374 |
| 148 | IPI00024913.2  | Isoform Long of ES1 protein homolog, mitochondrial                                     | 16.21972036 |
| 149 | IPI00816106.3  | Isoform 4 of Deducator of cytokinesis protein 7                                        | 16.0455668  |
| 150 | IPI00792218.1  | proteasome subunit alpha type-4 isoform 2                                              | 16.04161143 |
| 151 | IPI00647678.2  | cDNA FLJ52703, highly similar to Asparaginyl-tRNA synthetase, cytoplasmic              | 15.62722707 |
| 152 | IPI00554701.2  | Cytochrome b-c1 complex subunit 9                                                      | 15.61058617 |
| 153 | IPI00305289.2  | Kinesin-like protein KIF11                                                             | 15.60377216 |
| 154 | IPI00103732.1  | Thymidylate synthetase, isoform CRA_a                                                  | 15.59636855 |
| 155 | IPI00642326.1  | zinc finger, MYM-type 3                                                                | 15.44959974 |
| 156 | IPI00396203.7  | Isoform 1 of Tubulin-specific chaperone D                                              | 15.43279815 |
| 157 | IPI00645518.1  | Isoform 1 of CDP-diacylglycerol--inositol 3-phosphatidyltransferase                    | 15.31668091 |
| 158 | IPI00024719.1  | Isoform A of Histone acetyltransferase type B catalytic subunit                        | 15.30857706 |
| 159 | IPI00293735.2  | Elongator complex protein 1                                                            | 15.27497411 |
| 160 | IPI00929313.1  | coiled-coil domain containing 168                                                      | 15.07390261 |
| 161 | IPI01011651.1  | nucleoporin 98kDa                                                                      | 15.02397823 |
| 162 | IPI01012847.1  | RAB35, member RAS oncogene family                                                      | 14.94564271 |
| 163 | IPI00398727.3  | Isoform 2 of Acyl-protein thioesterase 1                                               | 14.82557869 |
| 164 | IPI00981725.1  | peptidylprolyl isomerase H (cyclophilin H)                                             | 14.69265079 |
| 165 | IPI01013095.1  | cDNA, FLJ79243, highly similar to Eukaryotic translation initiation factor 3 subunit 1 | 14.58456922 |
| 166 | IPI00743813.3  | Isoform 1 of Abnormal spindle-like microcephaly-associated protein                     | 14.49706197 |
| 167 | IPI00011619.4  | Bifunctional 3'-phosphoadenosine 5'-phosphosulfate synthase 1                          | 14.39087629 |
| 168 | IPI00328361.7  | Seryl-tRNA synthetase, mitochondrial                                                   | 14.34127712 |
| 169 | IPI00374272.3  | chromosome 5 open reading frame 51                                                     | 14.28932667 |
| 170 | IPI00034159.1  | V-type proton ATPase subunit d 1                                                       | 14.14081883 |
| 171 | IPI00032387.1  | DNA replication complex GINS protein PSF1                                              | 14.1289773  |
| 172 | IPI00216770.1  | Isoform 2 of 26S protease regulatory subunit 6B                                        | 14.11542821 |
| 173 | IPI00383500.3  | Isoform 2 of Fermitin family homolog 2                                                 | 14.09937    |
| 174 | IPI00414384.1  | Isoform 1 of Hydroxysteroid dehydrogenase-like protein 2                               | 13.95179152 |
| 175 | IPI00607577.2  | superoxide dismutase [Mn], mitochondrial isoform B precursor                           | 13.84640741 |
| 176 | IPI00910755.1  | cDNA FLJ51707, highly similar to Heat-shock protein 105 kDa                            | 13.83009171 |
| 177 | IPI00041325.1  | H/ACA ribonucleoprotein complex subunit 2                                              | 13.82135797 |
| 178 | IPI00177498.16 | Isoform 3 of LIM and calponin homology domains-containing protein 1                    | 13.80416584 |
| 179 | IPI00552913.4  | Isoform 2 of Syntaxin-7                                                                | 13.76695967 |
| 180 | IPI00028005.1  | Nuclear pore complex protein Nup107                                                    | 13.68241692 |
| 181 | IPI00019407.1  | Sterol-4-alpha-carboxylate 3-dehydrogenase, decarboxylating                            | 13.59610152 |
| 182 | IPI00852917.1  | Copine I                                                                               | 13.57617283 |
| 183 | IPI00300078.6  | Periodic tryptophan protein 2 homolog                                                  | 13.56396508 |
| 184 | IPI00744711.2  | Polyribonucleotide nucleotidyltransferase 1, mitochondrial                             | 13.42098427 |
| 185 | IPI00790334.1  | Polymerase (DNA directed), epsilon, isoform CRA_a                                      | 13.40018821 |
| 186 | IPI00166749.3  | Mitochondrial-processing peptidase subunit alpha                                       | 13.38723707 |
| 187 | IPI00952964.1  | L-lactate dehydrogenase A chain isoform 4                                              | 13.30574989 |

|     |               |                                                                                   |             |
|-----|---------------|-----------------------------------------------------------------------------------|-------------|
| 188 | IPI00966693.1 | glutathione S-transferase, C-terminal domain containing                           | 13.25156164 |
| 189 | IPI00939526.1 | Uncharacterized protein                                                           | 13.2412262  |
| 190 | IPI00965290.1 | Isoform 3 of Cullin-4B                                                            | 13.20198965 |
| 191 | IPI00983406.1 | branched-chain-amino-acid aminotransferase, cytosolic isoform 5                   | 13.14481378 |
| 192 | IPI00477424.4 | DHX57 protein variant (Fragment)                                                  | 13.1199398  |
| 193 | IPI00790937.3 | 60S ribosomal export protein NMD3                                                 | 13.08651328 |
| 194 | IPI00979853.1 | eukaryotic translation initiation factor 3, subunit M                             | 13.01624179 |
| 195 | IPI00798401.2 | cDNA FLJ50992, highly similar to Coronin-1C                                       | 12.9656148  |
| 196 | IPI00742682.2 | Nucleoprotein TPR                                                                 | 12.95771432 |
| 197 | IPI01015254.1 | cDNA FLJ53681, highly similar to Glycogen (starch) synthase, muscle               | 12.92818904 |
| 198 | IPI00910697.1 | cDNA FLJ53703, highly similar to Histidyl-tRNA synthetase                         | 12.88820577 |
| 199 | IPI00658145.3 | Isoform 1 of BRCA1-associated ATM activator 1                                     | 12.84551978 |
| 200 | IPI00328911.3 | E3 ubiquitin-protein ligase HECTD1                                                | 12.81816292 |
| 201 | IPI00789281.2 | Isoform 3 of Protein virilizer homolog                                            | 12.78548574 |
| 202 | IPI01012511.1 | cDNA FLJ50223, highly similar to Sterol O-acyltransferase 1                       | 12.65474391 |
| 203 | IPI00382699.2 | Isoform 5 of Filamin-B                                                            | 12.55565691 |
| 204 | IPI00878236.3 | fibrous sheath-interacting protein 2                                              | 12.4965713  |
| 205 | IPI00944623.1 | Isoform 3 of Golgin subfamily A member 3                                          | 12.46515846 |
| 206 | IPI01011723.1 | cDNA FLJ51704, highly similar to ADP-ribosylation factor-like protein 1           | 12.1291225  |
| 207 | IPI01009186.1 | cDNA FLJ58476, highly similar to Poly(rC)-binding protein 2                       | 12.12248826 |
| 208 | IPI00640096.2 | cDNA FLJ57101, highly similar to SAC domain-containing protein 3                  | 12.09884024 |
| 209 | IPI00182180.2 | OTU domain-containing protein 6B                                                  | 11.93218946 |
| 210 | IPI00871617.1 | Isoform 1 of Lys-63-specific deubiquitinase BRCC36                                | 11.8933475  |
| 211 | IPI00893923.1 | Isoform 2 of Golgi to ER traffic protein 4 homolog                                | 11.80594444 |
| 212 | IPI00003455.3 | Isoform 4 of Nucleoporin NDC1                                                     | 11.69121122 |
| 213 | IPI00966935.1 | methionyl aminopeptidase 1                                                        | 11.54681015 |
| 214 | IPI00976647.1 | staufer, RNA binding protein, homolog 2 (Drosophila)                              | 11.51790977 |
| 215 | IPI00552886.1 | Exosomal core protein CSL4                                                        | 11.51610184 |
| 216 | IPI00552920.2 | Exosome complex component RRP43                                                   | 11.48156738 |
| 217 | IPI00218106.3 | Isoform 2 of Transcription elongation factor A protein 1                          | 11.38789392 |
| 218 | IPI01011408.1 | cDNA FLJ16235 fis, clone FEBRA2028516                                             | 11.30251765 |
| 219 | IPI00646415.1 | RAB14, member RAS oncogene family                                                 | 11.29374671 |
| 220 | IPI00743994.2 | laminin subunit alpha-3 isoform 3                                                 | 11.21005273 |
| 221 | IPI00002335.1 | huntingtin                                                                        | 11.17695832 |
| 222 | IPI00797126.2 | nascent polypeptide-associated complex subunit alpha isoform a                    | 11.11984396 |
| 223 | IPI00921912.2 | rod cGMP-specific 3',5'-cyclic phosphodiesterase subunit beta isoform 3           | 10.99007988 |
| 224 | IPI00297084.7 | Dolichyl-diphosphooligosaccharide--protein glycosyltransferase 48 kDa subunit     | 10.89367771 |
| 225 | IPI00294879.1 | Ran GTPase-activating protein 1                                                   | 10.86647868 |
| 226 | IPI00917001.2 | cDNA, FLJ79439, highly similar to NEDD8-activating enzyme E1 catalytic subunit    | 10.85314226 |
| 227 | IPI00291175.7 | Isoform 1 of Vinculin                                                             | 10.82610989 |
| 228 | IPI00171459.4 | Inactive hydroxysteroid dehydrogenase-like protein 1                              | 10.82172179 |
| 229 | IPI00939530.1 | cDNA FLJ34106 fis, clone FCBBF3008073, highly similar to SPLICING FACTOR, ARGININ | 10.78457308 |
| 230 | IPI00033907.1 | Anaphase-promoting complex subunit 1                                              | 10.73571968 |
| 231 | IPI00220665.6 | Isoform 3 of Hexokinase-1                                                         | 10.71835494 |
| 232 | IPI00329719.1 | Myosin-Id                                                                         | 10.68723392 |
| 233 | IPI00910514.1 | xaa-Pro dipeptidase isoform 2                                                     | 10.65641642 |
| 234 | IPI00014253.4 | Ribosome biogenesis regulatory protein homolog                                    | 10.64323997 |

|     |               |                                                                                      |             |
|-----|---------------|--------------------------------------------------------------------------------------|-------------|
| 235 | IPI00181135.4 | Branched-chain-amino-acid aminotransferase                                           | 10.63430691 |
| 236 | IPI00900328.3 | transcription activator BRG1 isoform F                                               | 10.62978029 |
| 237 | IPI00384745.4 | guanine nucleotide binding protein-like 1                                            | 10.53790355 |
| 238 | IPI00791573.1 | Isoform 2 of Suppressor of G2 allele of SKP1 homolog                                 | 10.52630734 |
| 239 | IPI00877948.1 | Minichromosome maintenance complex component 5                                       | 10.50127697 |
| 240 | IPI00394699.3 | Uncharacterized protein                                                              | 10.49009347 |
| 241 | IPI00169168.1 | Isoform 3 of F-box only protein 22                                                   | 10.43747807 |
| 242 | IPI00396218.2 | SCY1-like protein 2                                                                  | 10.42661786 |
| 243 | IPI00786874.1 | Putative Golgi pH regulator C                                                        | 10.37785602 |
| 244 | IPI00908668.1 | apoptosis inhibitor 5 isoform c                                                      | 10.30549598 |
| 245 | IPI00218922.5 | Translocation protein SEC63 homolog                                                  | 10.23215318 |
| 246 | IPI00414980.2 | Isoform 2 of Myosin-Ib                                                               | 10.22754383 |
| 247 | IPI00910169.1 | cDNA FLJ54122, highly similar to Cytosol aminopeptidase                              | 10.06744417 |
| 248 | IPI00946283.1 | transportin 3                                                                        | 10.05775833 |
| 249 | IPI00968174.1 | IQ motif containing GTPase activating protein 2                                      | 9.929574966 |
| 250 | IPI00002557.1 | Coatomer subunit gamma-2                                                             | 9.908848047 |
| 251 | IPI00843789.2 | Glycine dehydrogenase [decarboxylating], mitochondrial                               | 9.883997917 |
| 252 | IPI00909961.1 | cDNA FLJ50720, highly similar to Homo sapiens tropomyosin 3 (TPM3), transcript va    | 9.837865829 |
| 253 | IPI00910728.1 | cDNA FLJ57599, moderately similar to Eukaryotic translation initiation factor 3 subu | 9.831304789 |
| 254 | IPI00470922.2 | Isoform 2 of N-alpha-acetyltransferase 50, NatE catalytic subunit                    | 9.777771473 |
| 255 | IPI00219526.6 | Isoform 1 of Phosphoglucomutase-1                                                    | 9.775624275 |
| 256 | IPI00239415.4 | Polytrophin                                                                          | 9.697652102 |
| 257 | IPI00925016.1 | N-acylaminoacyl-peptide hydrolase                                                    | 9.694558859 |
| 258 | IPI00215764.1 | Isoform Short of Metastasis-associated protein MTA1                                  | 9.636773586 |
| 259 | IPI00216999.2 | Pumilio domain-containing protein C14orf21                                           | 9.629089594 |
| 260 | IPI00074489.1 | NDUFB10 protein                                                                      | 9.616615295 |
| 261 | IPI00856038.2 | cDNA FLJ53358, highly similar to Heterogeneous nuclear ribonucleoprotein R           | 9.535647154 |
| 262 | IPI00646889.1 | Uncharacterized protein                                                              | 9.468101025 |
| 263 | IPI00061245.4 | 28S ribosomal protein S10, mitochondrial                                             | 9.452897549 |
| 264 | IPI00922035.1 | cDNA FLJ52950                                                                        | 9.363273859 |
| 265 | IPI00106847.3 | Isoform GTBP-alt of DNA mismatch repair protein Msh6                                 | 9.361681223 |
| 266 | IPI00000846.2 | Isoform 1 of Chromodomain-helicase-DNA-binding protein 4                             | 9.30049777  |
| 267 | IPI00976265.2 | dipeptidyl-peptidase 3                                                               | 9.297903538 |
| 268 | IPI00945912.1 | cDNA FLJ59963, highly similar to Homo sapiens multiple substrate lipid kinase (M     | 9.279073238 |
| 269 | IPI00025710.1 | chromosome 21 open reading frame 59                                                  | 9.151694775 |
| 270 | IPI00410069.4 | zinc finger CCCH-type, antiviral 1                                                   | 9.137892008 |
| 271 | IPI00180681.6 | coiled-coil domain-containing protein 41                                             | 9.098641634 |
| 272 | IPI00647528.1 | Exosome component 2, isoform CRA_b                                                   | 9.083474636 |
| 273 | IPI00920991.1 | Similar to Cyclin k                                                                  | 8.956657887 |
| 274 | IPI00294501.1 | 7-dehydrocholesterol reductase                                                       | 8.902279615 |
| 275 | IPI00022542.1 | Rho-associated protein kinase 1                                                      | 8.890659809 |
| 276 | IPI00642838.3 | Isoform 2 of Lysophospholipase-like protein 1                                        | 8.841372252 |
| 277 | IPI00966031.1 | Eukaryotic translation initiation factor 4E                                          | 8.82912755  |
| 278 | IPI00922492.1 | cDNA FLJ53090, moderately similar to RNA-binding motif, single-stranded-interacti    | 8.820865154 |
| 279 | IPI01013010.1 | eukaryotic translation initiation factor 2B, subunit 1 alpha, 26kDa                  | 8.683921099 |
| 280 | IPI00024317.1 | Isoform Long of Glutaryl-CoA dehydrogenase, mitochondrial                            | 8.629867792 |
| 281 | IPI01015267.1 | phosphoglucomutase 2                                                                 | 8.614906311 |

|     |               |                                                                                     |             |
|-----|---------------|-------------------------------------------------------------------------------------|-------------|
| 282 | IPI00477355.3 | KIF1-binding protein                                                                | 8.612172127 |
| 283 | IPI00065486.3 | Isoform 2 of ATP-binding cassette sub-family B member 6, mitochondrial              | 8.608422995 |
| 284 | IPI00910254.2 | cDNA FLJ50983, highly similar to Homo sapiens lysocardiolipin acyltransferase (LYC) | 8.607723951 |
| 285 | IPI00470870.1 | Putative uncharacterized protein DKFZp686J22257                                     | 8.564293146 |
| 286 | IPI00184311.4 | Ectonucleotide pyrophosphatase/phosphodiesterase family member 1                    | 8.496405363 |
| 287 | IPI00926796.1 | procollagen-lysine, 2-oxoglutarate 5-dioxygenase 3                                  | 8.487639189 |
| 288 | IPI00797314.1 | COP9 constitutive photomorphogenic homolog subunit 3 (Arabidopsis)                  | 8.480714321 |
| 289 | IPI00017921.7 | Isoform 2 of Protein bicaudal C homolog 1                                           | 8.418764591 |
| 290 | IPI00853417.1 | SCO2 cytochrome c oxidase assembly protein                                          | 8.412479877 |
| 291 | IPI00005492.2 | WD repeat-containing protein 5                                                      | 8.403086901 |
| 292 | IPI00947201.1 | GLIS family zinc finger 3 transcript variant T55                                    | 8.397313356 |
| 293 | IPI00917299.1 | gamma-glutamylcyclotransferase                                                      | 8.375939608 |
| 294 | IPI00878484.1 | Ewing sarcoma breakpoint region 1                                                   | 8.321173191 |
| 295 | IPI00983652.2 | cDNA FLJ61021, highly similar to Far upstream element-binding protein 1             | 8.286056519 |
| 296 | IPI01009061.1 | Truncated tumor suppressor protein P16                                              | 8.27630496  |
| 297 | IPI00927188.1 | Solute carrier family 4 sodium bicarbonate cotransporter member 7 type 2 variant    | 8.248812914 |
| 298 | IPI00981773.1 | cDNA FLJ53377, highly similar to Procollagen-lysine, 2-oxoglutarate 5-dioxygenase   | 8.229576111 |
| 299 | IPI00018236.2 | Ganglioside GM2 activator                                                           | 8.210482597 |
| 300 | IPI00903257.1 | cDNA FLJ39170 fis, clone OCBBF2003028, highly similar to Rattus norvegicus basic le | 8.172838449 |
| 301 | IPI00024802.1 | TATA-binding protein-associated factor 172                                          | 8.127103567 |
| 302 | IPI00974096.1 | family with sequence similarity 184, member A                                       | 8.075909615 |
| 303 | IPI00398625.5 | Hornerin                                                                            | 8.045919418 |
| 304 | IPI00977865.1 | non-specific lipid-transfer protein isoform 8 proprotein                            | 8.02077508  |
| 305 | IPI00008511.2 | NADH dehydrogenase subunit 5                                                        | 8.004798412 |
| 306 | IPI00984992.1 | non-SMC condensin II complex, subunit D3                                            | 7.977009058 |
| 307 | IPI00216659.1 | Isoform 2 of RNA-binding protein 8A                                                 | 7.946021318 |
| 308 | IPI00878524.1 | ribosomal protein L3                                                                | 7.911752939 |
| 309 | IPI00853207.1 | Protein phosphatase 2A activator, regulatory subunit 4                              | 7.889402628 |
| 310 | IPI00219833.2 | Mitochondrial import inner membrane translocase subunit Tim17-B                     | 7.879449368 |
| 311 | IPI00983620.1 | peptidyl-prolyl cis-trans isomerase A-like                                          | 7.864541054 |
| 312 | IPI00098902.4 | 2-oxoglutarate dehydrogenase, mitochondrial                                         | 7.815811157 |
| 313 | IPI00514769.3 | Isoform 1 of Serine/threonine-protein phosphatase 6 regulatory ankyrin repeat su    | 7.812160254 |
| 314 | IPI00946670.1 | NADH dehydrogenase (ubiquinone) 1 alpha subcomplex, 5, 13kDa                        | 7.799548864 |
| 315 | IPI00885004.1 | Isoform 2 of Xin actin-binding repeat-containing protein 2                          | 7.798505783 |
| 316 | IPI00980681.1 | chloride channel, nucleotide-sensitive, 1A                                          | 7.791601181 |
| 317 | IPI00977524.1 | Isoform 1 of 39S ribosomal protein L22, mitochondrial                               | 7.686861992 |
| 318 | IPI00941385.2 | Isoform 3 of Ubiquitin carboxyl-terminal hydrolase 10                               | 7.675077915 |
| 319 | IPI00908755.1 | cDNA FLJ53392, highly similar to Ubiquitin-activating enzyme E1                     | 7.640746355 |
| 320 | IPI00974217.2 | inositol(myo)-1(or 4)-monophosphatase 1                                             | 7.634245396 |
| 321 | IPI00012837.1 | Kinesin-1 heavy chain                                                               | 7.632534742 |
| 322 | IPI00968146.1 | ribosomal protein S3A                                                               | 7.612484217 |
| 323 | IPI00657704.4 | tumor protein p53 binding protein 1                                                 | 7.589646816 |
| 324 | IPI00914601.2 | Ubiquitin carboxyl-terminal hydrolase                                               | 7.572229862 |
| 325 | IPI00797590.4 | NOP2 protein                                                                        | 7.556642294 |
| 326 | IPI00878316.2 | intraflagellar transport protein 27 homolog isoform 3                               | 7.49800539  |
| 327 | IPI00237446.7 | Isoform 2 of Probable phospholipid-transporting ATPase IG                           | 7.497519016 |
| 328 | IPI00873472.1 | Isoform 1 of Protein transport protein Sec24A                                       | 7.455308676 |

|     |                |                                                                                     |             |
|-----|----------------|-------------------------------------------------------------------------------------|-------------|
| 329 | IPI00938044.2  | 3-hydroxyacyl-CoA dehydratase 3-like isoform 1                                      | 7.423033476 |
| 330 | IPI00011522.3  | cDNA, FLJ79450, highly similar to 3-ketoacyl-CoA thiolase, peroxisomal              | 7.394384146 |
| 331 | IPI00853634.3  | Isoform 6 of Trinucleotide repeat-containing gene 6A protein                        | 7.388463974 |
| 332 | IPI00747876.2  | Isoform 4 of Protein CASC5                                                          | 7.37757659  |
| 333 | IPI01010425.1  | angiopoietin-like 4                                                                 | 7.372381449 |
| 334 | IPI00032137.2  | Alpha-actinin-3                                                                     | 7.364738464 |
| 335 | IPI00983323.1  | Parkinson disease 7 domain containing 1                                             | 7.361906528 |
| 336 | IPI00293242.1  | Isoform 2 of General transcription factor II-I                                      | 7.329498291 |
| 337 | IPI00385645.1  | Isoform 2 of Fibroblast growth factor 17                                            | 7.319234848 |
| 338 | IPI00854642.1  | Isoform 1 of Sister chromatid cohesion protein PDS5 homolog A                       | 7.312296152 |
| 339 | IPI00477489.1  | Isoform 1 of Ras-related protein Rab-4B                                             | 7.309978485 |
| 340 | IPI00847558.1  | Similar to Non-POU domain-containing octamer-binding protein                        | 7.268417597 |
| 341 | IPI00218465.10 | Phospholipase A-2-activating protein                                                | 7.261775017 |
| 342 | IPI00926241.1  | Isoform 2 of TBC1 domain family member 4                                            | 7.246945143 |
| 343 | IPI00917410.1  | protein kinase, interferon-inducible double stranded RNA dependent activator        | 7.241206408 |
| 344 | IPI00883900.2  | cDNA FLJ61360, highly similar to Crumbs homolog 1                                   | 7.2365973   |
| 345 | IPI01009317.1  | cDNA FLJ50426, highly similar to Ubiquitin carboxyl-terminal hydrolase 7            | 7.222208738 |
| 346 | IPI00168262.2  | Procollagen galactosyltransferase 1                                                 | 7.221436024 |
| 347 | IPI00295502.6  | Isoform 1 of Protein Wiz                                                            | 7.207459211 |
| 348 | IPI00555893.3  | Isoform 3 of Vacuolar protein sorting-associated protein 54                         | 7.203310013 |
| 349 | IPI01015580.1  | adaptor-related protein complex 2, beta 1 subunit                                   | 7.122530222 |
| 350 | IPI00876931.1  | Integrator complex subunit 1                                                        | 7.115786314 |
| 351 | IPI00103560.1  | Isoform 1 of Dual specificity protein phosphatase CDC14B                            | 7.115598679 |
| 352 | IPI00910144.2  | chromosome 22 open reading frame 28                                                 | 7.101982832 |
| 353 | IPI00908746.1  | cDNA FLJ51535, highly similar to Phosphatidylethanolamine-binding protein 1         | 7.098308086 |
| 354 | IPI00013949.1  | Small glutamine-rich tetratricopeptide repeat-containing protein alpha              | 7.046792269 |
| 355 | IPI01011241.1  | eukaryotic translation initiation factor 3, subunit H                               | 7.026051283 |
| 356 | IPI00945735.1  | RAB7A, member RAS oncogene family                                                   | 7.024266958 |
| 357 | IPI00984284.1  | heterogeneous nuclear ribonucleoprotein H1 (H)                                      | 7.018344879 |
| 358 | IPI00977201.1  | FERM domain containing 8                                                            | 6.955527067 |
| 359 | IPI00301434.4  | BolA-like protein 2                                                                 | 6.94065237  |
| 360 | IPI00514321.1  | Chromosome 20 open reading frame 72                                                 | 6.917865992 |
| 361 | IPI00867688.2  | Similar to DEAH (Asp-Glu-Ala-His) box polypeptide 40                                | 6.862523794 |
| 362 | IPI00642443.3  | General transcription factor IIIC, polypeptide 5, 63kDa                             | 6.845027924 |
| 363 | IPI01010581.1  | cDNA FLJ51337, highly similar to Signal transducer and activator of transcription 4 | 6.833633184 |
| 364 | IPI00644425.1  | Ras homolog gene family, member C                                                   | 6.826744556 |
| 365 | IPI00747534.3  | Pyroline-5-carboxylate reductase                                                    | 6.82123065  |
| 366 | IPI00894206.2  | tetratricopeptide repeat protein 27 isoform 2                                       | 6.798231125 |
| 367 | IPI01014476.1  | Aspartate aminotransferase                                                          | 6.768373966 |
| 368 | IPI00167806.3  | Isoform 2 of RNA-binding protein Musashi homolog 2                                  | 6.729918718 |
| 369 | IPI00894059.1  | exportin 1 (CRM1 homolog, yeast)                                                    | 6.72880125  |
| 370 | IPI00444454.3  | Isoform 2 of Putative helicase MOV-10                                               | 6.72008872  |
| 371 | IPI00984387.1  | cDNA FLJ53166, highly similar to Dihydropyrimidinase-related protein 2              | 6.719806194 |
| 372 | IPI00607548.4  | Isoform 5 of InaD-like protein                                                      | 6.709991217 |
| 373 | IPI00940377.1  | glutathione S-transferase mu 2 (muscle)                                             | 6.697089434 |
| 374 | IPI00642422.2  | Isoform 2 of Probable histone-lysine N-methyltransferase ASH1L                      | 6.681286812 |
| 375 | IPI00977554.1  | endoribonuclease Dicer isoform 2                                                    | 6.647475004 |

|     |               |                                                                               |             |
|-----|---------------|-------------------------------------------------------------------------------|-------------|
| 376 | IPI00903191.1 | Eukaryotic translation initiation factor 3, subunit D                         | 6.604324341 |
| 377 | IPI00964248.1 | transmembrane protein 165                                                     | 6.596060276 |
| 378 | IPI01010257.1 | Similar to YLP motif containing 1                                             | 6.589266539 |
| 379 | IPI00967340.1 | LPS-responsive vesicle trafficking, beach and anchor containing               | 6.580407143 |
| 380 | IPI00930380.1 | Serine/threonine-protein phosphatase                                          | 6.571713686 |
| 381 | IPI00937974.2 | Delta-aminolevulinic acid dehydratase                                         | 6.566494703 |
| 382 | IPI00007358.1 | Zinc finger HIT domain-containing protein 1                                   | 6.555282831 |
| 383 | IPI00217143.3 | succinate dehydrogenase complex, subunit A, flavoprotein (Fp)                 | 6.536279202 |
| 384 | IPI00791794.1 | Isoform 6 of Protein diaphanous homolog 3                                     | 6.527878284 |
| 385 | IPI00909721.1 | cDNA FLJ51562, highly similar to Prohibitin                                   | 6.50565052  |
| 386 | IPI00556601.1 | Solute carrier family 25 member 4 variant (Fragment)                          | 6.498196125 |
| 387 | IPI00387088.1 | Isoform 4 of FAD synthase                                                     | 6.477309942 |
| 388 | IPI00978171.1 | proteasome (prosome, macropain) 26S subunit, ATPase, 3                        | 6.422775984 |
| 389 | IPI00549343.3 | Vesicle-associated membrane protein 3                                         | 6.397579193 |
| 390 | IPI00947130.1 | coiled-coil domain containing 14                                              | 6.365230799 |
| 391 | IPI00787306.1 | regulator of chromosome condensation isoform b                                | 6.311150789 |
| 392 | IPI00639828.1 | Four and a half LIM domains 1                                                 | 6.293713331 |
| 393 | IPI00024129.1 | Peptidyl-prolyl cis-trans isomerase C                                         | 6.268741608 |
| 394 | IPI00984541.1 | ectonucleotide pyrophosphatase/phosphodiesterase family member 7-like         | 6.262800455 |
| 395 | IPI00658186.1 | cDNA FLJ59463, highly similar to Geranylgeranyl pyrophosphate synthetase      | 6.249212265 |
| 396 | IPI00789033.2 | 5'-nucleotidase, cytosolic III-like                                           | 6.247641563 |
| 397 | IPI00412742.1 | Isoform 2 of Calcium-binding mitochondrial carrier protein SCaMC-1            | 6.234661579 |
| 398 | IPI00029744.1 | Single-stranded DNA-binding protein, mitochondrial                            | 6.233521223 |
| 399 | IPI00556429.3 | cDNA FLJ51423, highly similar to Serine/threonine-protein kinase PLK1         | 6.232278109 |
| 400 | IPI00645206.2 | Isoform 1 of Protocadherin-17                                                 | 6.215114594 |
| 401 | IPI00966157.1 | SAR1 homolog B ( <i>S. cerevisiae</i> )                                       | 6.206763029 |
| 402 | IPI00176637.5 | Eukaryotic translation initiation factor 2 subunit 2-like protein             | 6.189522028 |
| 403 | IPI00788837.2 | cDNA FLJ54752, highly similar to Poly(rC)-binding protein 2                   | 6.184121609 |
| 404 | IPI00641815.1 | Isoform 2 of TIP41-like protein                                               | 6.180614471 |
| 405 | IPI00297121.6 | replication termination factor 2 domain containing 1                          | 6.179140091 |
| 406 | IPI01015730.1 | DNA-directed RNA polymerase                                                   | 6.136565924 |
| 407 | IPI01013345.1 | testis expressed 10                                                           | 6.110919952 |
| 408 | IPI00873716.1 | Lamina-associated polypeptide 2, isoforms beta/gamma variant (Fragment)       | 6.102148771 |
| 409 | IPI00657768.1 | phosphoribosylglycinamide formyltransferase, phosphoribosylglycinamide synthe | 6.102040291 |
| 410 | IPI00027180.1 | CAAX prenyl protease 1 homolog                                                | 6.094688416 |
| 411 | IPI00916797.1 | non-SMC condensin II complex, subunit G2                                      | 6.076131105 |
| 412 | IPI00927458.1 | ribosomal protein L32                                                         | 6.071841955 |
| 413 | IPI01011969.1 | cDNA FLJ58372, highly similar to Nuclear pore complex protein Nup88           | 6.059197664 |
| 414 | IPI00743576.1 | Isoform 2 of V-type proton ATPase 116 kDa subunit a isoform 1                 | 6.02908659  |
| 415 | IPI00004506.3 | BTB/POZ domain-containing protein KCTD5                                       | 5.988526583 |
| 416 | IPI00741107.3 | Isoform 3 of Melanoma inhibitory activity protein 3                           | 5.979962349 |
| 417 | IPI00642510.3 | testis-expressed sequence 10 protein isoform 2                                | 5.925148249 |
| 418 | IPI00892532.1 | glypican 1                                                                    | 5.92497921  |
| 419 | IPI00647751.2 | Isoform 2 of Calmodulin-regulated spectrin-associated protein 1               | 5.924484491 |
| 420 | IPI00909684.1 | cDNA FLJ57602, highly similar to Creatine kinase M-type                       | 5.888777733 |
| 421 | IPI00410091.3 | chromosome 11 open reading frame 73                                           | 5.875143051 |
| 422 | IPI00789008.1 | Flotillin-2                                                                   | 5.873680592 |

|     |               |                                                                                    |             |
|-----|---------------|------------------------------------------------------------------------------------|-------------|
| 423 | IPI01013230.1 | cDNA FLJ51319, highly similar to tRNA (adenine-N(1)-methyltransferase non-catal    | 5.834569693 |
| 424 | IPI00964795.1 | cDNA FLJ58215, highly similar to Homo sapiens leucine zipper transcription factor- | 5.817508936 |
| 425 | IPI00740909.1 | Isoform 3 of Alstrom syndrome protein 1                                            | 5.813872099 |
| 426 | IPI00056496.1 | Ras-related protein Rab-24                                                         | 5.811949492 |
| 427 | IPI00790673.2 | Isoform 3 of Cytoplasmic FMR1-interacting protein 1                                | 5.76056695  |
| 428 | IPI00007731.1 | Isoform 1 of BAG family molecular chaperone regulator 5                            | 5.752711296 |
| 429 | IPI00045939.4 | 2-aminoethanethiol dioxygenase                                                     | 5.743136883 |
| 430 | IPI01011531.2 | cDNA FLJ54191, highly similar to Annexin A7                                        | 5.737822056 |
| 431 | IPI00909122.1 | poly(A)-specific ribonuclease PARN isoform 2                                       | 5.656954288 |
| 432 | IPI01010584.1 | KIAA0586                                                                           | 5.6519382   |
| 433 | IPI00645341.1 | BCL6 corepressor                                                                   | 5.629693508 |
| 434 | IPI00022430.1 | Glyceraldehyde-3-phosphate dehydrogenase, testis-specific                          | 5.616788387 |
| 435 | IPI00011077.4 | 39S ribosomal protein L32, mitochondrial precursor                                 | 5.58299017  |
| 436 | IPI00000156.3 | Isoform Beta of DNA ligase 3                                                       | 5.463475227 |
| 437 | IPI00965501.2 | cDNA FLJ54242, highly similar to Calnexin                                          | 5.423078299 |
| 438 | IPI00654820.2 | ATP synthase subunit a                                                             | 5.402955532 |
| 439 | IPI00929107.1 | Seipin isoform 1                                                                   | 5.297815084 |
| 440 | IPI00186139.8 | Similar to Protein KRI1 homolog                                                    | 5.294789791 |
| 441 | IPI01010750.1 | DNA ligase (Fragment)                                                              | 5.294677258 |
| 442 | IPI00872952.1 | Ubiquinol-cytochrome c reductase hinge protein, isoform CRA_c                      | 5.278233051 |
| 443 | IPI00640947.2 | Isoform 2 of tRNA-dihydrouridine synthase 3-like                                   | 5.276941299 |
| 444 | IPI00514530.5 | actin, alpha 1, skeletal muscle                                                    | 5.267291546 |
| 445 | IPI00550234.4 | Isoform 1 of Actin-related protein 2/3 complex subunit 5                           | 5.248762608 |
| 446 | IPI00738216.3 | KIAA0947                                                                           | 5.246402979 |
| 447 | IPI00926196.2 | cDNA FLJ56396, highly similar to Huntingtin-interacting protein 1                  | 5.238226891 |
| 448 | IPI00893074.1 | Family with sequence similarity 118, member A                                      | 5.206407547 |
| 449 | IPI00413144.6 | Isoform 2 of Treslin                                                               | 5.174490452 |
| 450 | IPI00852843.1 | Isoform 2 of N-alpha-acetyltransferase 25, NatB auxiliary subunit                  | 5.157077789 |
| 451 | IPI00477093.3 | Isoform 3 of Integrator complex subunit 3                                          | 5.132245064 |
| 452 | IPI00927271.1 | transformer 2 beta homolog (Drosophila)                                            | 5.12930584  |
| 453 | IPI00878795.1 | RAN binding protein 1                                                              | 5.125430346 |
| 454 | IPI00980781.1 | N-acetyltransferase 10 (GCN5-related)                                              | 5.037157536 |
| 455 | IPI00982254.1 | cDNA FLJ60573, highly similar to TNF receptor-associated factor 5                  | 4.956015348 |
| 456 | IPI01010224.1 | zinc finger protein 844                                                            | 4.917386532 |
| 457 | IPI00647044.1 | Microsomal glutathione S-transferase 3                                             | 4.916156292 |
| 458 | IPI00953689.1 | Alpha-2-HS-glycoprotein                                                            | 4.895540237 |
| 459 | IPI00019046.4 | Isoform 1 of Pre-mRNA-splicing factor RBM22                                        | 4.87909627  |
| 460 | IPI00982734.1 | Conserved hypothetical protein                                                     | 4.849043846 |
| 461 | IPI00980903.1 | phosphatidylinositol 4-kinase, catalytic, beta                                     | 4.841104031 |
| 462 | IPI00172648.1 | Isoform 5 of Ribosome-releasing factor 2, mitochondrial                            | 4.790606499 |
| 463 | IPI00456965.5 | Isoform 1 of 2-methoxy-6-polyprenyl-1,4-benzoquinol methylase, mitochondrial       | 4.789173126 |
| 464 | IPI00167818.3 | SPANXA2 overlapping transcript 1 (non-protein coding)                              | 4.770785332 |
| 465 | IPI00792538.1 | APEX nuclease (multifunctional DNA repair enzyme) 1                                | 4.667920589 |
| 466 | IPI00394874.3 | Isoform 2 of Ectonucleoside triphosphate diphosphohydrolase 8                      | 4.656054974 |
| 467 | IPI00446850.1 | chromosome 1 open reading frame 186                                                | 4.620590687 |
| 468 | IPI00031047.2 | IQ motif containing G                                                              | 4.586830616 |
| 469 | IPI00915457.1 | Isoform 1 of POTE ankyrin domain family member C                                   | 4.578995228 |

|     |                |                                                                                   |             |
|-----|----------------|-----------------------------------------------------------------------------------|-------------|
| 470 | IPI00922577.1  | cdNA FLJ53768, highly similar to Hepatocyte growth factor-like protein            | 4.565380573 |
| 471 | IPI00967531.1  | peroxisomal biogenesis factor 10                                                  | 4.541862965 |
| 472 | IPI00791071.2  | Isoform 2 of Protein PIEZO2                                                       | 4.518009663 |
| 473 | IPI00885017.1  | cdNA, FLJ79527, moderately similar to Uroporphyrinogen decarboxylase              | 4.502159119 |
| 474 | IPI00977526.1  | family with sequence similarity 126, member B                                     | 4.491538048 |
| 475 | IPI00941345.1  | tenascin XB                                                                       | 4.478475571 |
| 476 | IPI00385955.1  | Brain my037 protein                                                               | 4.467207432 |
| 477 | IPI00878764.1  | I(3)mbt-like 2 (Drosophila)                                                       | 4.463213921 |
| 478 | IPI00879449.1  | sperm antigen with calponin homology and coiled-coil domains 1-like               | 4.461359024 |
| 479 | IPI00470766.14 | Isoform 1 of Olfactomedin-like protein 2B                                         | 4.452666759 |
| 480 | IPI00945820.1  | Uncharacterized protein                                                           | 4.451300144 |
| 481 | IPI00219478.3  | Isoform 2 of Phosphoserine aminotransferase                                       | 4.419585705 |
| 482 | IPI00985082.1  | Receptor type protein tyrosine phosphatase gamma (Fragment)                       | 4.407513142 |
| 483 | IPI00220381.2  | Isoform 2 of Transcription factor 20                                              | 4.401259422 |
| 484 | IPI01012170.1  | atlastin GTPase 3                                                                 | 4.385352135 |
| 485 | IPI00293288.2  | Isoform 1 of Glutamate receptor, ionotropic kainate 5                             | 4.378353119 |
| 486 | IPI00790281.2  | cdNA FLJ51777, highly similar to Squamous cell carcinoma antigen recognized by T- | 4.369580746 |
| 487 | IPI01011431.1  | cdNA FLJ60167, highly similar to Cytosolic acyl coenzyme A thioester hydrolase    | 4.365740776 |
| 488 | IPI00909251.1  | cdNA FLJ51165, highly similar to DNA damage-binding protein 1                     | 4.331735611 |
| 489 | IPI00008527.3  | 60S acidic ribosomal protein P1                                                   | 4.300535679 |
| 490 | IPI00171540.2  | Chromosome transmission fidelity protein 8 homolog isoform 2                      | 4.280999184 |
| 491 | IPI00015580.3  | Isoform 3 of Formin-binding protein 1-like                                        | 4.280753613 |
| 492 | IPI00939219.1  | Equilibrative nucleoside transporter 1                                            | 4.262634277 |
| 493 | IPI00945125.1  | superkiller viralicidic activity 2-like (S. cerevisiae)                           | 4.259326458 |
| 494 | IPI00978544.1  | ATPase, H <sup>+</sup> transporting, lysosomal 50/57kDa, V1 subunit H             | 4.258832932 |
| 495 | IPI00292787.6  | Actin-related protein 5                                                           | 4.229960442 |
| 496 | IPI00873684.1  | Isoform 2 of Collagen alpha-1(IV) chain                                           | 4.200462341 |
| 497 | IPI01010893.1  | late endosomal/lysosomal adaptor, MAPK and MTOR activator 1                       | 4.200406551 |
| 498 | IPI00980323.2  | cdNA FLJ51919, highly similar to Homo sapiens abhydrolase domain containing 8 (   | 4.197277546 |
| 499 | IPI00171856.1  | Deoxyhypusine hydroxylase                                                         | 4.190542221 |
| 500 | IPI00386885.1  | cdNA FLJ14414 fis, clone HEMBA1004847, highly similar to SIGNAL RECOGNITION PAR   | 4.186115265 |
| 501 | IPI00017533.2  | Cytochrome c oxidase subunit 3                                                    | 4.178531647 |
| 502 | IPI01014582.1  | lactate dehydrogenase A                                                           | 4.168670654 |
| 503 | IPI00745311.2  | Killer cell immunoglobulin-like receptor 3DS1                                     | 4.165480137 |
| 504 | IPI00945805.1  | ribonuclease P/MRP 40kDa subunit                                                  | 4.165179729 |
| 505 | IPI00397498.1  | Isoform 2 of Carbamoyl-phosphate synthase [ammonia], mitochondrial                | 4.142326355 |
| 506 | IPI00006934.1  | Hydroxyacid oxidase 1                                                             | 4.140348434 |
| 507 | IPI01009009.1  | RBM14-RBM4 protein isoform 2                                                      | 4.1335392   |
| 508 | IPI00440719.2  | N(alpha)-acetyltransferase 10, NatA catalytic subunit                             | 4.089213848 |
| 509 | IPI00976088.1  | ribonucleotide reductase M1                                                       | 4.08574295  |
| 510 | IPI00411545.3  | Isoform 3 of Thrombopoietin                                                       | 4.053452492 |
| 511 | IPI00477605.6  | Isoform 1 of Acyl-coenzyme A synthetase ACSM5, mitochondrial                      | 4.029726028 |
| 512 | IPI00172656.6  | FAS-associated factor 2                                                           | 4.014418125 |
| 513 | IPI00471914.6  | Isoform 2 of FYVE, RhoGEF and PH domain-containing protein 6                      | 3.978642225 |
| 514 | IPI01010503.1  | stress-induced-phosphoprotein 1                                                   | 3.972180367 |
| 515 | IPI00909754.1  | cdNA FLJ61500, highly similar to NNP-1 protein                                    | 3.964648247 |
| 516 | IPI00967973.1  | Calnexin                                                                          | 3.95118475  |



|     |               |                                                                                      |             |
|-----|---------------|--------------------------------------------------------------------------------------|-------------|
| 517 | IPI00549761.3 | Chitobiosyldiphosphodolichol beta-mannosyltransferase                                | 3.946815252 |
| 518 | IPI00853224.1 | StAR-related lipid transfer protein 7, mitochondrial                                 | 3.938904047 |
| 519 | IPI00656111.1 | Isoform E of Proteoglycan 4                                                          | 3.934770823 |
| 520 | IPI00167841.2 | Isoform 2 of Activating transcription factor 7-interacting protein 2                 | 3.929155827 |
| 521 | IPI00924758.1 | cDNA FLJ32188 fis, clone PLACE6002056, highly similar to Guanine nucleotide-binding  | 3.922733784 |
| 522 | IPI00016074.2 | M-phase phosphoprotein 6                                                             | 3.912299156 |
| 523 | IPI00916247.2 | exonuclease 3'-5' domain containing 2                                                | 3.891948462 |
| 524 | IPI00914539.1 | Isoform 2 of Ankyrin repeat and FYVE domain-containing protein 1                     | 3.890255928 |
| 525 | IPI00219090.1 | Isoform 2 of Protein arginine N-methyltransferase 7                                  | 3.8867414   |
| 526 | IPI00911085.1 | cDNA FLJ53754, highly similar to Transmembrane emp24 domain-containing protein       | 3.886036158 |
| 527 | IPI00893200.1 | 19 kDa protein                                                                       | 3.873499632 |
| 528 | IPI00968217.1 | NOP14 nucleolar protein                                                              | 3.843609095 |
| 529 | IPI00903259.2 | cDNA FLJ54005, highly similar to Transcription elongation factor SPT5                | 3.842230082 |
| 530 | IPI00981682.1 | proline synthetase co-transcribed homolog (bacterial)                                | 3.840254068 |
| 531 | IPI00011201.1 | NAD-dependent malic enzyme, mitochondrial                                            | 3.814752579 |
| 532 | IPI00947372.2 | structural maintenance of chromosomes 4                                              | 3.812386274 |
| 533 | IPI00879643.1 | mitochondrial fission process 1                                                      | 3.807324171 |
| 534 | IPI00980448.1 | NADH dehydrogenase (ubiquinone) 1 beta subcomplex, 4, 15kDa                          | 3.787592173 |
| 535 | IPI00916763.1 | heat shock 10kDa protein 1 (chaperonin 10)                                           | 3.747044325 |
| 536 | IPI00745182.1 | phospholipase C, gamma 1                                                             | 3.731425047 |
| 537 | IPI00185398.4 | methionyl-tRNA synthetase                                                            | 3.730978489 |
| 538 | IPI01012564.1 | cDNA FLJ52405, highly similar to Myosin Ic                                           | 3.730549574 |
| 539 | IPI00966206.1 | programmed cell death 6                                                              | 3.729136467 |
| 540 | IPI00031424.1 | Isoform 2 of Phosphatidylinositol 4-kinase alpha                                     | 3.728237629 |
| 541 | IPI00607610.1 | Isoform 1 of Protein FAM36A                                                          | 3.727309227 |
| 542 | IPI00642862.1 | Peptidyl-prolyl cis-trans isomerase-like 4                                           | 3.714351177 |
| 543 | IPI01014635.1 | solute carrier family 3 (activators of dibasic and neutral amino acid transport), me | 3.713633299 |
| 544 | IPI00007814.3 | V-type proton ATPase subunit C 1                                                     | 3.700995922 |
| 545 | IPI00555788.2 | Isoform 3 of Glycerophosphodiester phosphodiesterase domain-containing protei        | 3.698200703 |
| 546 | IPI01015537.1 | general transcription factor IIH, polypeptide 3, 34kDa                               | 3.69206953  |
| 547 | IPI00472003.1 | Isoform 4 of BH3-interacting domain death agonist                                    | 3.677544594 |
| 548 | IPI00981108.1 | cDNA FLJ35898 fis, clone TESTI2009520, highly similar to Rattus norvegicus endopla   | 3.676934004 |
| 549 | IPI00941876.2 | Isoform 5 of PARP1-binding protein                                                   | 3.670991421 |
| 550 | IPI00329025.1 | Protein jagunal homolog 1                                                            | 3.655322552 |
| 551 | IPI00964370.1 | cDNA FLJ60877, highly similar to Zinc finger protein 346                             | 3.633505821 |
| 552 | IPI00980509.1 | nucleosome assembly protein 1-like 4                                                 | 3.629339695 |
| 553 | IPI00977571.1 | hypothetical protein LOC100508996                                                    | 3.625877142 |
| 554 | IPI00910915.1 | cDNA FLJ54756, moderately similar to Homo sapiens nitric oxide synthase interacti    | 3.624631166 |
| 555 | IPI00001141.4 | Mitochondrial import inner membrane translocase subunit Tim22                        | 3.610780239 |
| 556 | IPI00005045.1 | ATP-binding cassette sub-family F member 2                                           | 3.604427099 |
| 557 | IPI00418277.3 | Chondroitin sulfate synthase 3                                                       | 3.575285912 |
| 558 | IPI00645653.1 | translocase of inner mitochondrial membrane 23 homolog B (yeast)                     | 3.567307472 |
| 559 | IPI00740019.3 | Isoform 1 of Protein Daple                                                           | 3.561594009 |
| 560 | IPI00791914.2 | BM-010 variant (Fragment)                                                            | 3.551699877 |
| 561 | IPI00975639.1 | dynamamin 3                                                                          | 3.546967268 |
| 562 | IPI00291417.2 | Isoform 1 of Dephospho-CoA kinase domain-containing protein                          | 3.539319515 |
| 563 | IPI00027705.2 | Isoform 1 of DNA primase large subunit                                               | 3.534766436 |

|     |               |                                                                                   |             |
|-----|---------------|-----------------------------------------------------------------------------------|-------------|
| 564 | IPI00382858.2 | Isoform B of Trimethyllysine dioxygenase, mitochondrial                           | 3.529125452 |
| 565 | IPI00386667.2 | Isoform 2 of Carboxypeptidase A6                                                  | 3.528172255 |
| 566 | IPI00844404.2 | Isoform 2 of TRMT1-like protein                                                   | 3.524603367 |
| 567 | IPI00059242.3 | Synapse-associated protein 1                                                      | 3.520887136 |
| 568 | IPI00145593.7 | Nucleolar MIF4G domain-containing protein 1                                       | 3.505145788 |
| 569 | IPI00010120.4 | Isoform 1 of C-terminal-binding protein 2                                         | 3.504005671 |
| 570 | IPI01012217.1 | Full-length cDNA clone CSODI035YL21 of Placenta of Homo sapiens                   | 3.502397299 |
| 571 | IPI00908319.1 | cDNA FLJ51570, highly similar to Thioredoxin domain-containing protein 1          | 3.500628233 |
| 572 | IPI00910984.1 | cDNA FLJ57468                                                                     | 3.495084524 |
| 573 | IPI00843886.1 | apolipoprotein O                                                                  | 3.490085602 |
| 574 | IPI00976697.1 | family with sequence similarity 76, member A                                      | 3.488691807 |
| 575 | IPI01012747.1 | aldehyde dehydrogenase 5 family, member A1                                        | 3.485749245 |
| 576 | IPI00942336.1 | listerin E3 ubiquitin protein ligase 1                                            | 3.485023975 |
| 577 | IPI00916551.1 | malate dehydrogenase 1, NAD (soluble)                                             | 3.479502916 |
| 578 | IPI00604702.1 | Isoform 2 of Phosphopantothoenylcysteine decarboxylase                            | 3.47889924  |
| 579 | IPI00924999.1 | IMP (inosine 5'-monophosphate) dehydrogenase 2                                    | 3.474856853 |
| 580 | IPI00888266.3 | n-acetylserotonin O-methyltransferase-like protein-like                           | 3.474449635 |
| 581 | IPI00829629.1 | Isoform 3 of Proteasome activator complex subunit 4                               | 3.460556269 |
| 582 | IPI00297455.6 | A-kinase anchor protein 8-like                                                    | 3.456336975 |
| 583 | IPI00982043.1 | KIAA1967                                                                          | 3.451563597 |
| 584 | IPI01010009.1 | diablo, IAP-binding mitochondrial protein                                         | 3.451171875 |
| 585 | IPI00964195.1 | coproporphyrinogen oxidase                                                        | 3.444897652 |
| 586 | IPI00981208.1 | cysteine and histidine-rich domain (CHORD) containing 1                           | 3.443861723 |
| 587 | IPI00965708.1 | pleiotropic regulator 1                                                           | 3.441361666 |
| 588 | IPI00909062.2 | CoA synthase                                                                      | 3.432289839 |
| 589 | IPI00975884.1 | solute carrier family 39 (zinc transporter), member 14                            | 3.430989265 |
| 590 | IPI00032995.1 | LanC-like protein 2                                                               | 3.424777269 |
| 591 | IPI00257933.8 | Protein BEX5                                                                      | 3.423010588 |
| 592 | IPI00025344.1 | NADH dehydrogenase [ubiquinone] iron-sulfur protein 6, mitochondrial              | 3.41641736  |
| 593 | IPI00384224.4 | Similar to dual specificity phosphatase 9                                         | 3.416248798 |
| 594 | IPI00888802.1 | coiled-coil domain containing 74A                                                 | 3.416227818 |
| 595 | IPI00985284.1 | La ribonucleoprotein domain family, member 1                                      | 3.413938761 |
| 596 | IPI00298353.4 | Guanylate-binding protein 7                                                       | 3.412475348 |
| 597 | IPI00966636.1 | matrin 3                                                                          | 3.411032677 |
| 598 | IPI00419792.3 | Similar to Dual specificity mitogen-activated protein kinase kinase 2             | 3.410777092 |
| 599 | IPI00640296.1 | Heterogeneous nuclear ribonucleoprotein K                                         | 3.410216331 |
| 600 | IPI00954996.1 | chromosome X open reading frame 56                                                | 3.409793377 |
| 601 | IPI01014588.1 | cDNA FLJ58155, highly similar to Cohesin subunit SA-2                             | 3.409322023 |
| 602 | IPI00647752.2 | cDNA FLJ61735, highly similar to Zinc finger A20 domain-containing protein 1      | 3.407420635 |
| 603 | IPI00217386.1 | Isoform 2 of DNA-directed RNA polymerases I and III subunit RPAC1                 | 3.404648304 |
| 604 | IPI00007049.1 | 28S ribosomal protein S18c, mitochondrial                                         | 3.401761532 |
| 605 | IPI01013137.1 | cDNA FLJ58497, highly similar to Unc-13 homolog C                                 | 3.401104927 |
| 606 | IPI01013452.1 | proteasome (prosome, macropain) 26S subunit, non-ATPase, 9                        | 3.400309563 |
| 607 | IPI01014223.1 | cDNA FLJ50851, highly similar to Tyrosine-protein phosphatase non-receptor type 1 | 3.39807415  |
| 608 | IPI01015742.1 | serine/threonine kinase 38 like                                                   | 3.397047043 |
| 609 | IPI00878166.1 | Isoform 2 of NHL repeat-containing protein 2                                      | 3.393936634 |
| 610 | IPI00879999.1 | Isoform 1 of ATP-dependent RNA helicase DDX54                                     | 3.385189056 |

|     |               |                                                                                    |             |
|-----|---------------|------------------------------------------------------------------------------------|-------------|
| 611 | IPI01009407.1 | cdNA FLJ45137 fis, clone BRAWH3038827, highly similar to Homo sapiens leucine-zf   | 3.38276577  |
| 612 | IPI00009771.6 | Lamin-B2                                                                           | 3.380929232 |
| 613 | IPI00306661.3 | E3 ubiquitin-protein ligase KCMF1                                                  | 3.376299381 |
| 614 | IPI00909658.1 | cdNA FLJ52759, highly similar to Plastin-2                                         | 3.375437975 |
| 615 | IPI00902957.1 | cdNA FLJ90012 fis, clone HEMBA1000462, highly similar to CCR4-NOT transcription co | 3.371630907 |
| 616 | IPI00867515.1 | unc-51-like kinase 4 (C. elegans)                                                  | 3.366783857 |
| 617 | IPI00945024.1 | staphylococcal nuclease and tudor domain containing 1                              | 3.366449118 |
| 618 | IPI00654793.2 | NAD kinase domain containing 1                                                     | 3.358320475 |
| 619 | IPI00007979.4 | NADH-ubiquinone oxidoreductase chain 2                                             | 3.349155188 |
| 620 | IPI00916446.1 | distal-less homeobox 1                                                             | 3.343543053 |
| 621 | IPI00375701.2 | Isoform 2 of VIP peptides                                                          | 3.336665392 |
| 622 | IPI00395507.4 | Isoform 2 of ELAV-like protein 4                                                   | 3.335440874 |
| 623 | IPI00943071.2 | cdNA FLJ57184, highly similar to Bromodomain and WD repeat domain-containing       | 3.335140228 |
| 624 | IPI01015469.1 | 2-oxoglutarate and iron-dependent oxygenase domain containing 1                    | 3.333026171 |
| 625 | IPI00645320.1 | Isoform 3 of Beta-catenin-like protein 1                                           | 3.329285145 |
| 626 | IPI00925850.2 | cdNA FLJ54572, highly similar to Lysosomal alpha-mannosidase                       | 3.327897787 |
| 627 | IPI00902543.3 | NOP2/Sun domain family, member 5                                                   | 3.326188326 |
| 628 | IPI00853433.1 | ATPase, H+ transporting, lysosomal 31kDa, V1 subunit E1                            | 3.324478149 |
| 629 | IPI00215687.1 | Isoform 3 of Glutaminase kidney isoform, mitochondrial                             | 3.323078871 |
| 630 | IPI00032406.1 | DnaJ homolog subfamily A member 2                                                  | 3.321737766 |
| 631 | IPI00328938.4 | Isoform 1 of E3 ubiquitin-protein ligase RNF138                                    | 3.315677643 |
| 632 | IPI00307325.2 | Zinc finger protein 161 homolog                                                    | 3.315529585 |
| 633 | IPI00000105.4 | Major vault protein                                                                | 3.314646006 |
| 634 | IPI00856004.1 | ras-related protein R-Ras2 isoform b                                               | 3.313657522 |
| 635 | IPI00797490.2 | cdNA FLJ53588, highly similar to Translocation-associated membrane protein 1       | 3.311407328 |
| 636 | IPI00887254.2 | Putative ferritin heavy polypeptide-like 19                                        | 3.30765748  |
| 637 | IPI00930396.1 | cdNA FLJ35812 fis, clone TESTI2006051, highly similar to Acyl-coenzyme A thioester | 3.304494143 |
| 638 | IPI01018260.1 | cdNA FLJ11747 fis, clone HEMBA1005530, highly similar to Anaphase-promoting con    | 3.300151587 |
| 639 | IPI00376394.4 | Sulfhydryl oxidase 2                                                               | 3.298935175 |
| 640 | IPI00019976.2 | Coiled-coil domain-containing protein 85B                                          | 3.298585892 |
| 641 | IPI00788816.1 | Similar to Submaxillary gland androgen-regulated protein 3 homolog B precursor     | 3.295587301 |
| 642 | IPI00915874.1 | partner of NOB1 homolog (S. cerevisiae)                                            | 3.287039042 |
| 643 | IPI00926620.1 | cytochrome P450, family 51, subfamily A, polypeptide 1                             | 3.286698818 |
| 644 | IPI00646692.2 | RAB31, member RAS oncogene family                                                  | 3.285127401 |
| 645 | IPI00640585.2 | transmembrane protein 161A                                                         | 3.283124447 |
| 646 | IPI00909562.1 | cdNA FLJ52462, moderately similar to Mus musculus proteasome (prosome, macro       | 3.279426575 |
| 647 | IPI00402109.4 | Isoform 2 of Phosphatidylinositol glycan anchor biosynthesis class U protein       | 3.278314352 |
| 648 | IPI00795109.1 | cdNA, FLJ79092, highly similar to GTP-binding nuclear protein Ran                  | 3.278274775 |
| 649 | IPI00470629.4 | Isoform 1 of Calmodulin-lysine N-methyltransferase                                 | 3.274087906 |
| 650 | IPI00152196.3 | N-acylneuraminate-9-phosphatase                                                    | 3.271921158 |
| 651 | IPI00065521.5 | Putative tRNA pseudouridine synthase Pus10                                         | 3.271898031 |
| 652 | IPI00964345.1 | casein alpha s1                                                                    | 3.271681547 |
| 653 | IPI00927704.1 | transmembrane protein 237                                                          | 3.267240047 |
| 654 | IPI00916096.1 | Conserved hypothetical protein                                                     | 3.264837265 |
| 655 | IPI00922126.1 | cdNA FLJ57759, moderately similar to Transgelin-2                                  | 3.261574507 |
| 656 | IPI00847400.1 | chromosome 19 open reading frame 47                                                | 3.252752066 |
| 657 | IPI00855846.1 | ABRA C-terminal like                                                               | 3.250239372 |

|     |               |                                                                                    |             |
|-----|---------------|------------------------------------------------------------------------------------|-------------|
| 658 | IPI00759537.1 | Isoform 2 of Mitochondrial Rho GTPase 2                                            | 3.247343302 |
| 659 | IPI00909746.1 | cDNA FLJ51502, highly similar to 60S ribosomal protein L18a                        | 3.246116638 |
| 660 | IPI01009730.1 | Putative uncharacterized protein DKFZp547A1913                                     | 3.245847225 |
| 661 | IPI00641449.2 | Isoform 2 of Enhancer of mRNA-decapping protein 4                                  | 3.244997263 |
| 662 | IPI00927183.1 | Williams Beuren syndrome chromosome region 22                                      | 3.241432905 |
| 663 | IPI01015062.1 | cDNA FLJ45314 fis, clone BRHIP3005142, highly similar to Proteasome-associated pr  | 3.237799644 |
| 664 | IPI00215905.1 | Isoform IIC4 of Low affinity immunoglobulin gamma Fc region receptor II-c          | 3.235785246 |
| 665 | IPI00031115.5 | Golgin subfamily A member 1                                                        | 3.234233856 |
| 666 | IPI00965557.1 | methyltransferase like 14                                                          | 3.230890036 |
| 667 | IPI00854630.2 | proline rich 12                                                                    | 3.229253292 |
| 668 | IPI00643530.1 | cytochrome b5 reductase 1                                                          | 3.228613853 |
| 669 | IPI00792017.1 | schlafen family member 12                                                          | 3.222703695 |
| 670 | IPI00217430.1 | Isoform 2 of NLR family CARD domain-containing protein 4                           | 3.215734959 |
| 671 | IPI00478620.2 | tripartite motif-containing protein 48                                             | 3.211925507 |
| 672 | IPI00795573.1 | NECAP endocytosis associated 1                                                     | 3.210455894 |
| 673 | IPI00514986.1 | 5'-nucleotidase domain containing 1                                                | 3.204140425 |
| 674 | IPI01015523.1 | coiled-coil serine-rich protein 2                                                  | 3.202517986 |
| 675 | IPI00556297.1 | Arginine/serine-rich splicing factor 6 variant (Fragment)                          | 3.202192783 |
| 676 | IPI00917916.1 | DIS3 mitotic control homolog (S. cerevisiae)-like 2                                | 3.201835394 |
| 677 | IPI00301163.1 | Protein O-glucosyltransferase 1                                                    | 3.19927907  |
| 678 | IPI00173901.1 | Isoform 2 of Histone-lysine N-methyltransferase, H3 lysine-36 and H4 lysine-20 sp  | 3.195893049 |
| 679 | IPI01010263.1 | ubiquitin protein ligase E3 component n-recognin 7 (putative)                      | 3.194836617 |
| 680 | IPI00984362.1 | tissue specific transplantation antigen P35B                                       | 3.194470167 |
| 681 | IPI00807384.2 | cleavage and polyadenylation specific factor 3, 73kDa                              | 3.189180136 |
| 682 | IPI00976712.1 | zinc finger, CCHC domain containing 11                                             | 3.18565011  |
| 683 | IPI00100245.1 | DNA-directed RNA polymerase III subunit RPC6                                       | 3.185195923 |
| 684 | IPI00639912.2 | nuclear autoantigenic sperm protein (histone-binding)                              | 3.1851542   |
| 685 | IPI00644568.1 | budding uninhibited by benzimidazoles 3 homolog (yeast)                            | 3.181827784 |
| 686 | IPI00983570.1 | HLA class I histocompatibility antigen, A-69 alpha chain-like isoform 17           | 3.178947449 |
| 687 | IPI00220542.1 | Isoform 2 of Serine protease HTRA2, mitochondrial                                  | 3.178910494 |
| 688 | IPI00927837.1 | zinc finger CCCH-type containing 15                                                | 3.177031517 |
| 689 | IPI00552426.2 | serine/threonine kinase 24                                                         | 3.176285744 |
| 690 | IPI01013073.1 | mutS homolog 6 (E. coli)                                                           | 3.175209284 |
| 691 | IPI00160506.1 | ADAM metalloproteinase with thrombospondin type 1 motif, 13                        | 3.172572374 |
| 692 | IPI00184433.2 | Supported by Human ESTs AA017424.1 (NID:g1479799), H85906.1                        | 3.16696763  |
| 693 | IPI00642657.1 | Isoform 3 of Choline transporter-like protein 1                                    | 3.166265965 |
| 694 | IPI01010643.1 | cDNA FLJ38844 fis, clone MESAN2003662, highly similar to Cullin-1                  | 3.162334442 |
| 695 | IPI00013296.3 | 40S ribosomal protein S18                                                          | 3.146720648 |
| 696 | IPI00916394.2 | RAD54-like 2 (S. cerevisiae)                                                       | 3.143470049 |
| 697 | IPI00043262.1 | SATB2 antisense RNA 1                                                              | 3.139975071 |
| 698 | IPI01014549.1 | heme binding protein 1                                                             | 3.139760256 |
| 699 | IPI00514271.1 | Phosphodiesterase 4B, cAMP-specific                                                | 3.136208773 |
| 700 | IPI00178714.2 | Isoform 2 of Serine/threonine-protein kinase PAK 4                                 | 3.135077715 |
| 701 | IPI00939864.2 | cDNA FLJ31273 fis, clone KIDNE2006299, weakly similar to BOB1 PROTEIN              | 3.133990526 |
| 702 | IPI00976489.1 | ribosomal protein S2                                                               | 3.132829905 |
| 703 | IPI00644349.4 | cDNA FLJ60449, highly similar to Homo sapiens prion protein interacting protein (P | 3.130381584 |
| 704 | IPI00910594.2 | DDB1 and CUL4 associated factor 7                                                  | 3.127041578 |

|     |               |                                                                                            |             |
|-----|---------------|--------------------------------------------------------------------------------------------|-------------|
| 705 | IPI00759768.1 | Isoform 2 of Elongation factor Tu GTP-binding domain-containing protein 1                  | 3.126696348 |
| 706 | IPI00556344.2 | Isoform 2 of Lysophosphatidic acid phosphatase type 6                                      | 3.12577486  |
| 707 | IPI00061282.2 | Protein kinase, AMP-activated, alpha 1 catalytic subunit, isoform CRA_b                    | 3.125466108 |
| 708 | IPI00847729.2 | thyroid hormone receptor interactor 13                                                     | 3.121195316 |
| 709 | IPI00795983.1 | Coiled-coil alpha-helical rod protein 1                                                    | 3.11758256  |
| 710 | IPI00291525.1 | Dimethyladenosine transferase 1, mitochondrial                                             | 3.115568638 |
| 711 | IPI00413611.1 | DNA topoisomerase 1                                                                        | 3.113761425 |
| 712 | IPI00217005.7 | Ankyrin repeat domain-containing protein 18A                                               | 3.111149788 |
| 713 | IPI00909015.2 | cDNA FLJ58500, highly similar to Cytoplasmic dynein 1 light intermediate chain 1           | 3.10572052  |
| 714 | IPI00302309.6 | tetratricopeptide repeat domain 17                                                         | 3.10140872  |
| 715 | IPI00947454.1 | plastin 3                                                                                  | 3.097033262 |
| 716 | IPI00922127.1 | cDNA FLJ54708, highly similar to 150 kDa oxygen-regulated protein                          | 3.096722126 |
| 717 | IPI00658002.1 | Isoform 3 of Tyrosine-protein phosphatase non-receptor type 11                             | 3.094691753 |
| 718 | IPI00976000.1 | integrator complex subunit 9                                                               | 3.094225883 |
| 719 | IPI00965867.1 | importin 11                                                                                | 3.087956667 |
| 720 | IPI01018192.1 | cDNA FLJ30950 fis, clone HCASM1000061                                                      | 3.086732626 |
| 721 | IPI00450783.1 | Isoform 2 of ER lumen protein retaining receptor 2                                         | 3.081044197 |
| 722 | IPI00295394.2 | Cytochrome c oxidase assembly protein COX11, mitochondrial                                 | 3.077878475 |
| 723 | IPI00922333.1 | cDNA FLJ50250, highly similar to Structural maintenance of chromosome 1-like 1 pr          | 3.076677799 |
| 724 | IPI00333634.4 | chromosome 20 open reading frame 194                                                       | 3.076010942 |
| 725 | IPI00921944.1 | cDNA FLJ54863, highly similar to CTP synthase 1                                            | 3.073092699 |
| 726 | IPI00945851.1 | ribophorin I                                                                               | 3.064904928 |
| 727 | IPI00910541.2 | cDNA FLJ58838, highly similar to Homo sapiens radical S-adenosyl methionine and            | 3.061270952 |
| 728 | IPI00218266.1 | Isoform Long of Vasoactive intestinal polypeptide receptor 1                               | 3.060194254 |
| 729 | IPI00943678.1 | anaphase-promoting complex subunit 1-like                                                  | 3.059614897 |
| 730 | IPI00795180.3 | cDNA FLJ59673, highly similar to Homo sapiens growth and transformation-depend             | 3.055035353 |
| 731 | IPI00329321.3 | LYR motif-containing protein 7                                                             | 3.053508282 |
| 732 | IPI01013650.1 | G protein-coupled receptor 126                                                             | 3.051602125 |
| 733 | IPI00977213.1 | succinate dehydrogenase complex, subunit D, integral membrane protein                      | 3.050844431 |
| 734 | IPI00964658.1 | septin 11                                                                                  | 3.049089909 |
| 735 | IPI00553172.1 | caspase 3, apoptosis-related cysteine peptidase                                            | 3.046720266 |
| 736 | IPI00414005.2 | Isoform Short of Sodium/potassium-transporting ATPase subunit alpha-1                      | 3.046513557 |
| 737 | IPI00984321.2 | excision repair cross-complementing rodent repair deficiency, complementation g            | 3.034834385 |
| 738 | IPI00976594.1 | cDNA FLJ55046, highly similar to Methionyl-tRNA synthetase                                 | 3.033221245 |
| 739 | IPI00303335.3 | Nebulin                                                                                    | 3.027050972 |
| 740 | IPI00910598.1 | Isoform 2 of Nucleoside diphosphate kinase 6                                               | 3.023873806 |
| 741 | IPI00045456.1 | chromosome 10 open reading frame 113                                                       | 3.021387339 |
| 742 | IPI00983309.1 | STT3, subunit of the oligosaccharyltransferase complex, homolog A ( <i>S. cerevisiae</i> ) | 3.021257162 |
| 743 | IPI00217240.1 | WD repeat-containing protein 75                                                            | 3.019135952 |
| 744 | IPI00297626.4 | Syntaxin-binding protein 3                                                                 | 3.017946482 |
| 745 | IPI00217541.3 | ATP-dependent RNA helicase DDX51                                                           | 3.017280817 |
| 746 | IPI00917443.2 | dedicator of cytokinesis 5                                                                 | 3.015888929 |
| 747 | IPI00855962.1 | Isoform 2 of FK506-binding protein 15                                                      | 3.014819384 |
| 748 | IPI00983774.1 | protein phosphatase 2, catalytic subunit, beta isozyme                                     | 3.01027441  |
| 749 | IPI00184707.1 | Isoform 2 of FERM domain-containing protein 6                                              | 3.009544134 |
| 750 | IPI00002424.1 | Pleckstrin homology domain-containing family F member 2                                    | 3.005003214 |
| 751 | IPI00853068.2 | Hemoglobin alpha-2                                                                         | 3.003887415 |

|     |               |                                                                                       |             |
|-----|---------------|---------------------------------------------------------------------------------------|-------------|
| 752 | IPI00945467.1 | phosphatidylinositol-specific phospholipase C, X domain containing 2                  | 2.996738434 |
| 753 | IPI01012689.1 | Isoform E1S of G1/S-specific cyclin-E1                                                | 2.995843649 |
| 754 | IPI00909081.2 | protein tyrosine phosphatase type IVA 2 isoform 4                                     | 2.990827322 |
| 755 | IPI00922246.1 | cdNA FLJ58698, highly similar to cAMP-dependent protein kinase, alpha-catalytic s     | 2.987887621 |
| 756 | IPI00965994.1 | glucosamine-6-phosphate deaminase 1                                                   | 2.97500205  |
| 757 | IPI01010778.1 | cdNA FLJ55806, highly similar to Golgi phosphoprotein 3                               | 2.972642422 |
| 758 | IPI00398129.6 | Similar to 3-hydroxybutyrate dehydrogenase type 2                                     | 2.972138405 |
| 759 | IPI00329369.8 | ALS2 C-terminal-like protein isoform 3                                                | 2.967597723 |
| 760 | IPI00963825.1 | ATP synthase, H+ transporting, mitochondrial Fo complex, subunit C1 (subunit 9)       | 2.964182854 |
| 761 | IPI00386679.1 | ZNF607 protein                                                                        | 2.962964296 |
| 762 | IPI00384478.3 | family with sequence similarity 227, member B                                         | 2.959823608 |
| 763 | IPI00386908.3 | Isoform 2 of Alpha-parvin                                                             | 2.959525824 |
| 764 | IPI00785125.2 | Putative uncharacterized protein FLJ00310                                             | 2.958783627 |
| 765 | IPI01015780.1 | cdNA FLJ57449, highly similar to Notchless homolog 1                                  | 2.957838058 |
| 766 | IPI00792035.2 | Isoform 3 of Glyoxalase domain-containing protein 4                                   | 2.955942154 |
| 767 | IPI00909237.1 | cdNA FLJ55703, highly similar to Solute carrier family 2, facilitated glucose transpo | 2.955162048 |
| 768 | IPI00966573.1 | enolase-phosphatase 1                                                                 | 2.954790831 |
| 769 | IPI01010550.1 | cdNA FLJ55457, highly similar to ATP-dependent RNA helicase DHX8                      | 2.953880548 |
| 770 | IPI00830092.1 | Isoform 2 of Twisted gastrulation protein homolog 1                                   | 2.953283787 |
| 771 | IPI00952785.3 | Ca++-dependent secretion activator 2                                                  | 2.952512264 |
| 772 | IPI00024464.1 | PRO0843                                                                               | 2.951581955 |
| 773 | IPI00926887.1 | glioblastoma amplified sequence                                                       | 2.949511766 |
| 774 | IPI00300631.3 | Scaffold attachment factor B1                                                         | 2.948192596 |
| 775 | IPI00927766.1 | NCK interacting protein with SH3 domain                                               | 2.946702719 |
| 776 | IPI00946316.1 | karyopherin alpha 4 (importin alpha 3)                                                | 2.943986416 |
| 777 | IPI00102918.1 | Isoform 2 of ATR-interacting protein                                                  | 2.94173336  |
| 778 | IPI01009299.1 | cdNA FLJ60635, highly similar to Angiotensin-converting enzyme, somatic isoform       | 2.940118551 |
| 779 | IPI00795577.3 | Isoform 7 of Mucin-4                                                                  | 2.939316511 |
| 780 | IPI00982125.1 | FCF1 protein                                                                          | 2.937950373 |
| 781 | IPI00888999.1 | Isoform 2 of PNMA-like protein 2                                                      | 2.937551737 |
| 782 | IPI00945513.1 | TRAF3 interacting protein 3                                                           | 2.932587147 |
| 783 | IPI00980492.1 | Conserved hypothetical protein                                                        | 2.932492495 |
| 784 | IPI00916535.1 | prolyl 4-hydroxylase subunit alpha-1 isoform 3 precursor                              | 2.931104183 |
| 785 | IPI01010177.1 | cdNA FLJ51879, highly similar to Prenylcysteine oxidase                               | 2.928237677 |
| 786 | IPI00941117.2 | cdNA FLJ50310, highly similar to Zinc finger protein 198                              | 2.926929235 |
| 787 | IPI00984730.1 | Similar to DnaJ (Hsp40) homolog, subfamily B, member 1                                | 2.926818609 |
| 788 | IPI00940357.2 | RNA-directed DNA polymerase (reverse transcriptase) domain containing protein         | 2.926532984 |
| 789 | IPI00893883.1 | NME/NM23 nucleoside diphosphate kinase 4                                              | 2.924023867 |
| 790 | IPI00917184.1 | coiled-coil domain containing 150                                                     | 2.923926115 |
| 791 | IPI00879333.1 | guanine nucleotide binding protein (G protein), beta polypeptide 1-like               | 2.922519684 |
| 792 | IPI00902652.1 | cdNA FLJ37148 fis, clone BRACE2025333, highly similar to Homo sapiens Na+/H+ exc      | 2.919394493 |
| 793 | IPI01009695.1 | Bromodomain adjacent to zinc finger domain, 1A isoform b variant                      | 2.913550615 |
| 794 | IPI00975761.1 | processing of precursor 1, ribonuclease P/MRP subunit (S. cerevisiae)                 | 2.907921314 |
| 795 | IPI00984399.1 | lamin-B1 isoform 2                                                                    | 2.905791283 |
| 796 | IPI00979313.1 | family with sequence similarity 118, member B                                         | 2.902616739 |
| 797 | IPI00640929.1 | Ribosomal protein S6                                                                  | 2.901382685 |
| 798 | IPI00979873.1 | ribosomal RNA-processing protein 7 homolog A-like, partial                            | 2.89830637  |

|     |               |                                                                                   |             |
|-----|---------------|-----------------------------------------------------------------------------------|-------------|
| 799 | IPI00028937.1 | Ornithine decarboxylase antizyme 2                                                | 2.892297268 |
| 800 | IPI00967823.1 | ELMO/CED-12 domain containing 2                                                   | 2.891439676 |
| 801 | IPI00966960.1 | acyl-CoA synthetase family member 2                                               | 2.886399746 |
| 802 | IPI00291457.2 | Serine/threonine-protein kinase 35                                                | 2.885710239 |
| 803 | IPI00395967.2 | TMEM97 protein                                                                    | 2.880130768 |
| 804 | IPI00798339.4 | Isoform 4 of E1A-binding protein p400                                             | 2.879770756 |
| 805 | IPI00215907.2 | serine/arginine-rich splicing factor 7                                            | 2.876781464 |
| 806 | IPI00479058.2 | 40S ribosomal protein S15                                                         | 2.875518322 |
| 807 | IPI00792050.1 | ribosomal protein L8                                                              | 2.873644114 |
| 808 | IPI00442921.1 | CDNA FLJ26213 fis, clone ADG07906                                                 | 2.872962952 |
| 809 | IPI00514217.6 | Succinate-CoA ligase, ADP-forming, beta subunit                                   | 2.869974375 |
| 810 | IPI00552303.3 | annexin A11                                                                       | 2.869552851 |
| 811 | IPI00910936.1 | cDNA FLJ61101, highly similar to Eukaryotic translation initiation factor 5       | 2.865088701 |
| 812 | IPI00410547.1 | uncharacterized LOC400940                                                         | 2.860070944 |
| 813 | IPI00917435.1 | Isoform 4 of Thyroid adenoma-associated protein                                   | 2.85930419  |
| 814 | IPI00967837.1 | multimerin 1                                                                      | 2.855486393 |
| 815 | IPI00019400.1 | Thiopurine S-methyltransferase                                                    | 2.852811098 |
| 816 | IPI01013172.1 | cDNA FLJ58642, highly similar to Homo sapiens elongation protein 3 homolog (ELP3) | 2.850491285 |
| 817 | IPI00981200.1 | SID1 transmembrane family, member 2                                               | 2.846666098 |
| 818 | IPI00514742.3 | Uncharacterized protein                                                           | 2.842525959 |
| 819 | IPI00514385.2 | Isoleucyl-tRNA synthetase                                                         | 2.841986895 |
| 820 | IPI00917171.1 | integrin-linked kinase-associated serine/threonine phosphatase                    | 2.833169699 |
| 821 | IPI01012107.1 | defender against cell death 1                                                     | 2.83266139  |
| 822 | IPI00002225.6 | LAG1 longevity assurance homolog 4                                                | 2.831745625 |
| 823 | IPI00747361.3 | aladin isoform 2                                                                  | 2.829845905 |
| 824 | IPI00028083.1 | Translation initiation factor eIF-2B subunit beta                                 | 2.825948238 |
| 825 | IPI00385079.1 | MSTP151                                                                           | 2.825237274 |
| 826 | IPI00902967.1 | cDNA FLJ44468 fis, clone UTERU2026025, moderately similar to SPLICING FACTOR, AR  | 2.824178696 |
| 827 | IPI00072541.4 | Isoform 3 of PCI domain-containing protein 2                                      | 2.824063301 |
| 828 | IPI00383562.1 | Isoform 4 of Fermitin family homolog 1                                            | 2.820923328 |
| 829 | IPI00099463.2 | Sphingosine-1-phosphate lyase 1                                                   | 2.815997601 |
| 830 | IPI00942583.1 | Uncharacterized protein                                                           | 2.814167023 |
| 831 | IPI01009798.1 | mitochondrial ribosomal protein S28                                               | 2.801440001 |
| 832 | IPI00291643.4 | SPRY domain-containing protein 4                                                  | 2.797506809 |
| 833 | IPI01011878.1 | cDNA PSEC0228 fis, clone HEMBA1006099, weakly similar to COP-COATED VESICLE ME    | 2.790140152 |
| 834 | IPI00329826.4 | cDNA FLJ46853 fis, clone UTERU3009775, moderately similar to Rattus norvegicus PA | 2.78877306  |
| 835 | IPI00219484.1 | Isoform 3 of U1 small nuclear ribonucleoprotein 70 kDa                            | 2.782621145 |
| 836 | IPI00908503.1 | cDNA FLJ50605, moderately similar to Plastin-3                                    | 2.78034997  |
| 837 | IPI00007234.1 | Zinc finger protein 510                                                           | 2.770253658 |
| 838 | IPI00643715.1 | DnaJ (Hsp40) homolog, subfamily C, member 14                                      | 2.766234398 |
| 839 | IPI00383182.1 | PP3895                                                                            | 2.7661376   |
| 840 | IPI01010916.1 | major histocompatibility complex, class II, DQ beta 1                             | 2.765980482 |
| 841 | IPI00936836.2 | myomesin 3                                                                        | 2.750969172 |
| 842 | IPI00964379.1 | THO complex 3                                                                     | 2.744432688 |
| 843 | IPI00001539.8 | 3-ketoacyl-CoA thiolase, mitochondrial                                            | 2.741857767 |
| 844 | IPI00219866.2 | Isoform 2 of Zinc finger Ran-binding domain-containing protein 2                  | 2.718465805 |
| 845 | IPI00218848.5 | ATP synthase, H+ transporting, mitochondrial F0 complex, subunit E                | 2.712542772 |
| 846 | IPI00382790.3 | Isoform 2 of Sharpin                                                              | 2.6983459   |
| 847 | IPI00982409.1 | RING finger protein C14orf164-like                                                | 2.66461277  |
| 848 | IPI00028003.1 | Cytochrome c oxidase subunit 7B, mitochondrial                                    | 2.619421244 |
| 849 | IPI00945220.1 | golgi integral membrane protein 4                                                 | 2.604919434 |

**Table S4.** BPPM-revealed common nonhistone targets of EuHMT1 and 2 in HEK293T cells with the EuHMT21-Y1154A mutant and Hey-SAM 6 as BPPM reagents. These proteins are not present in the control (empty-vector transfected HEK293T cells).

| Serial | Accession      | Description                                                        | Score of EuHMT1 | score of EuHMT2 |
|--------|----------------|--------------------------------------------------------------------|-----------------|-----------------|
| 1      | IPI00942420.2  | Isoform 1 of Histone-lysine N-methyltransferase EHMT1              | 729.0146117     | 51.76659226     |
| 2      | IPI00026781.3  | Fatty acid synthase                                                | 391.2522674     | 759.7647235     |
| 3      | IPI00304925.5  | Heat shock 70 kDa protein 1A/1B                                    | 235.7833066     | 321.283962      |
| 4      | IPI00220644.8  | Isoform M1 of Pyruvate kinase isozymes M1/M2                       | 166.911351      | 149.4408383     |
| 5      | IPI00449049.5  | Poly [ADP-ribose] polymerase 1                                     | 160.6497989     | 260.0815408     |
| 6      | IPI00645078.1  | Ubiquitin-like modifier-activating enzyme 1                        | 148.5826547     | 212.3655384     |
| 7      | IPI00420014.2  | Isoform 1 of U5 small nuclear ribonucleoprotein 200 kDa helicase   | 121.9588175     | 366.528441      |
| 8      | IPI00893035.1  | carbamoyl-phosphate synthetase 2, aspartate transcarbamylase, ar   | 121.9285016     | 238.1053216     |
| 9      | IPI00645452.1  | Tubulin, beta                                                      | 118.182215      | 50.23914671     |
| 10     | IPI00643041.3  | GTP-binding nuclear protein Ran                                    | 116.9542315     | 70.04592967     |
| 11     | IPI00019502.3  | Isoform 1 of Myosin-9                                              | 115.9260545     | 237.2038248     |
| 12     | IPI00000874.1  | Peroxiredoxin-1                                                    | 113.6827171     | 177.3387182     |
| 13     | IPI00013452.11 | Bifunctional aminoacyl-tRNA synthetase                             | 106.737942      | 172.1725242     |
| 14     | IPI00017726.1  | Isoform 1 of 3-hydroxyacyl-CoA dehydrogenase type-2                | 104.8656714     | 61.59832907     |
| 15     | IPI00018146.1  | 14-3-3 protein theta                                               | 103.0258706     | 77.91386127     |
| 16     | IPI00219018.7  | Glyceraldehyde-3-phosphate dehydrogenase                           | 101.2805254     | 256.5314114     |
| 17     | IPI00007928.4  | Pre-mRNA-processing-splicing factor 8                              | 100.3890626     | 291.0308721     |
| 18     | IPI00021263.3  | 14-3-3 protein zeta/delta                                          | 99.24341798     | 64.90589786     |
| 19     | IPI00456969.1  | Cytoplasmic dynein 1 heavy chain 1                                 | 99.18983865     | 391.7522783     |
| 20     | IPI00394838.3  | cDNA FLJ56442, highly similar to ATP-citrate synthase              | 96.82186866     | 149.8845675     |
| 21     | IPI00216587.9  | 40S ribosomal protein S8                                           | 94.91858125     | 49.05260539     |
| 22     | IPI00218200.8  | B-cell receptor-associated protein 31                              | 94.08164167     | 40.01049781     |
| 23     | IPI00383581.4  | cDNA FLJ61290, highly similar to Neutral alpha-glucosidase AB      | 92.65108037     | 164.5848365     |
| 24     | IPI00297779.7  | T-complex protein 1 subunit beta                                   | 85.41790318     | 19.29311204     |
| 25     | IPI00030179.3  | 60S ribosomal protein L7                                           | 84.80247474     | 51.23387122     |
| 26     | IPI00967971.1  | ubiquitin carboxyl-terminal esterase L1 (ubiquitin thiolesterase)  | 84.78158069     | 46.09521461     |
| 27     | IPI00217223.1  | Multifunctional protein ADE2                                       | 82.60718107     | 96.83288717     |
| 28     | IPI00807545.1  | Isoform 3 of Heterogeneous nuclear ribonucleoprotein K             | 82.27658319     | 65.32964873     |
| 29     | IPI00008240.2  | Methionyl-tRNA synthetase, cytoplasmic                             | 80.92234015     | 117.8301554     |
| 30     | IPI00793443.2  | Isoform 1 of Importin-5                                            | 80.01624537     | 106.7574532     |
| 31     | IPI00007188.6  | ADP/ATP translocase 2                                              | 79.9827168      | 56.53837276     |
| 32     | IPI00783097.4  | Glycyl-tRNA synthetase                                             | 78.70939565     | 120.6101208     |
| 33     | IPI00329801.12 | Annexin A5                                                         | 78.23380566     | 55.84255219     |
| 34     | IPI00979136.1  | Ribonucleoside-diphosphate reductase                               | 77.46082282     | 108.3014402     |
| 35     | IPI00329633.5  | Threonyl-tRNA synthetase, cytoplasmic                              | 77.27365184     | 120.9481163     |
| 36     | IPI00025091.3  | 40S ribosomal protein S11                                          | 77.253052       | 71.76152396     |
| 37     | IPI00889541.2  | Isoform 4 of Probable ATP-dependent RNA helicase DDX17             | 76.96171999     | 94.11570525     |
| 38     | IPI00412579.6  | 60S ribosomal protein L10a                                         | 74.75596213     | 47.42085719     |
| 39     | IPI00294911.1  | Succinate dehydrogenase [ubiquinone] iron-sulfur subunit, mitoch   | 74.74311042     | 42.59361458     |
| 40     | IPI00220301.5  | Peroxiredoxin-6                                                    | 74.10010314     | 49.33346581     |
| 41     | IPI00217030.10 | 40S ribosomal protein S4, X isoform                                | 74.05303216     | 50.09114695     |
| 42     | IPI01012026.1  | chromodomain helicase DNA binding protein 4                        | 74.04750729     | 151.010915      |
| 43     | IPI00024175.3  | Isoform 1 of Proteasome subunit alpha type-7                       | 73.91543031     | 27.6172812      |
| 44     | IPI00022774.3  | Transitional endoplasmic reticulum ATPase                          | 73.26129746     | 149.5695152     |
| 45     | IPI00644224.2  | cDNA FLJ54020, highly similar to Heterogeneous nuclear ribonucleop | 72.63242865     | 145.3232844     |
| 46     | IPI00978796.1  | cofilin 1 (non-muscle)                                             | 71.99949503     | 85.76440644     |



|    |               |                                                                      |             |             |
|----|---------------|----------------------------------------------------------------------|-------------|-------------|
| 47 | IPI01014604.1 | T-complex protein 1 subunit delta                                    | 69.65310025 | 78.14010024 |
| 48 | IPI00140420.4 | Staphylococcal nuclease domain-containing protein 1                  | 69.51705146 | 89.10199308 |
| 49 | IPI00029133.4 | ATP synthase subunit b, mitochondrial                                | 69.10584235 | 49.95107341 |
| 50 | IPI00018465.1 | T-complex protein 1 subunit eta                                      | 69.01046848 | 84.1580894  |
| 51 | IPI00465365.4 | Isoform A1-A of Heterogeneous nuclear ribonucleoprotein A1           | 66.49793029 | 212.3037598 |
| 52 | IPI00291467.7 | ADP/ATP translocase 3                                                | 65.61314964 | 51.63087511 |
| 53 | IPI00012268.3 | 26S proteasome non-ATPase regulatory subunit 2                       | 64.83733439 | 127.3789473 |
| 54 | IPI00878075.1 | RAN binding protein 1                                                | 64.83252692 | 38.07210541 |
| 55 | IPI00917777.1 | 116 kDa U5 small nuclear ribonucleoprotein component isoform b       | 64.2363987  | 102.9461691 |
| 56 | IPI00549248.4 | Isoform 1 of Nucleophosmin                                           | 61.72652674 | 131.7312021 |
| 57 | IPI00419585.9 | Peptidyl-prolyl cis-trans isomerase A                                | 61.64404869 | 70.94191241 |
| 58 | IPI00867533.1 | 60S ribosomal protein L6                                             | 61.51985025 | 110.2808673 |
| 59 | IPI00002966.2 | Heat shock 70 kDa protein 4                                          | 61.04511046 | 85.93793941 |
| 60 | IPI00027230.3 | Endoplasmic reticulum chaperone protein                              | 61.04120731 | 125.1475878 |
| 61 | IPI00795292.1 | Isoform 3 of Nucleoside diphosphate kinase B                         | 60.4085772  | 53.31095743 |
| 62 | IPI00215917.3 | ADP-ribosylation factor 3                                            | 59.20805001 | 62.3566103  |
| 63 | IPI00217966.9 | Isoform 1 of L-lactate dehydrogenase A chain                         | 58.67067504 | 178.4921441 |
| 64 | IPI00029623.1 | Proteasome subunit alpha type-6                                      | 57.18178296 | 28.82169819 |
| 65 | IPI00020127.1 | Replication protein A 70 kDa DNA-binding subunit                     | 56.42424345 | 110.0033898 |
| 66 | IPI00015018.1 | Inorganic pyrophosphatase                                            | 56.11794639 | 170.3900266 |
| 67 | IPI00027350.3 | Peroxisomal oxidoreductase                                           | 55.92931271 | 63.50261545 |
| 68 | IPI00397526.3 | Isoform 1 of Myosin-10                                               | 55.7543714  | 119.0089898 |
| 69 | IPI00218988.4 | Isoform 2 of Adenylate kinase 2, mitochondrial                       | 55.4243381  | 44.54196548 |
| 70 | IPI00465361.4 | 60S ribosomal protein L13                                            | 54.99939442 | 20.32618785 |
| 71 | IPI00374151.1 | thioredoxin-dependent peroxide reductase, mitochondrial isoform      | 54.59023404 | 89.67426276 |
| 72 | IPI00022891.3 | ADP/ATP translocase 1                                                | 54.13334846 | 39.65227294 |
| 73 | IPI00300371.5 | Isoform 1 of Splicing factor 3B subunit 3                            | 53.94768524 | 97.95910382 |
| 74 | IPI00219306.1 | Protein mago nashi homolog                                           | 53.76058745 | 40.29925013 |
| 75 | IPI00783781.2 | Nuclear pore complex protein Nup205                                  | 53.75590611 | 136.3286684 |
| 76 | IPI00783378.3 | Ubiquitin-conjugating enzyme E2 O                                    | 52.98222733 | 57.0727365  |
| 77 | IPI00020075.4 | Abhydrolase domain-containing protein 10, mitochondrial              | 52.12625527 | 25.16440916 |
| 78 | IPI00941747.1 | Calnexin                                                             | 52.08898282 | 108.939739  |
| 79 | IPI00895852.1 | cellular nucleic acid-binding protein isoform 5                      | 52.00794601 | 85.08035088 |
| 80 | IPI00925853.1 | cDNA FLJ60586, highly similar to NADH-ubiquinone oxidoreductase 7    | 51.66277575 | 3.832695961 |
| 81 | IPI00013214.2 | cDNA FLJ55599, highly similar to DNA replication licensing factor MC | 51.3785069  | 91.51911545 |
| 82 | IPI00644127.2 | Isoleucyl-tRNA synthetase, cytoplasmic                               | 50.39426541 | 136.8429933 |
| 83 | IPI00003886.3 | Isoform 2 of Guanine nucleotide-binding protein-like 3               | 50.23450446 | 84.67073178 |
| 84 | IPI00216308.5 | Voltage-dependent anion-selective channel protein 1                  | 49.92797661 | 30.21461153 |
| 85 | IPI00216691.5 | Profilin-1                                                           | 49.36589336 | 39.42420149 |
| 86 | IPI00642936.2 | glutathione S-transferase omega-1 isoform 3                          | 49.1392777  | 30.95730042 |
| 87 | IPI00012048.1 | Isoform 1 of Nucleoside diphosphate kinase A                         | 48.40361905 | 43.98702502 |
| 88 | IPI00170924.2 | Histidine triad nucleotide-binding protein 3                         | 48.3692143  | 64.2205677  |
| 89 | IPI00739915.3 | Putative tubulin beta chain-like protein ENSP00000290377             | 47.63914037 | 52.74071693 |
| 90 | IPI00016832.1 | Isoform Short of Proteasome subunit alpha type-1                     | 47.40951896 | 19.06253815 |
| 91 | IPI00848298.1 | Isoform 2 of Apolipoprotein A-I-binding protein                      | 47.40377808 | 20.14720654 |
| 92 | IPI00015920.2 | Isoform 1 of Mitochondrial dicarboxylate carrier                     | 47.16355371 | 28.72216034 |
| 93 | IPI00927606.1 | Glutathione peroxidase 1                                             | 46.70900249 | 70.61924076 |

|     |                |                                                                                |             |             |
|-----|----------------|--------------------------------------------------------------------------------|-------------|-------------|
| 94  | IPI00411680.11 | Isoform 1 of Protein-L-isoaspartate(D-aspartate) O-methyltransferase           | 46.48782468 | 32.04926777 |
| 95  | IPI00219217.3  | L-lactate dehydrogenase B chain                                                | 46.39972949 | 175.9723818 |
| 96  | IPI00555744.6  | Ribosomal protein L14 variant                                                  | 45.61308312 | 19.45099711 |
| 97  | IPI00010896.3  | Chloride intracellular channel protein 1                                       | 44.61412549 | 22.36223078 |
| 98  | IPI00218606.7  | 40S ribosomal protein S23                                                      | 44.01858759 | 41.93586826 |
| 99  | IPI00789370.3  | serine hydroxymethyltransferase, mitochondrial isoform 3                       | 43.69448233 | 62.71231842 |
| 100 | IPI00411592.2  | Isoform 2 of Chromodomain-helicase-DNA-binding protein 3                       | 42.26829982 | 54.09346461 |
| 101 | IPI00221088.5  | 40S ribosomal protein S9                                                       | 41.80261087 | 55.15500164 |
| 102 | IPI00025329.1  | 60S ribosomal protein L19                                                      | 41.73298621 | 33.53769732 |
| 103 | IPI00289819.5  | Cation-independent mannose-6-phosphate receptor                                | 41.57298326 | 194.5548613 |
| 104 | IPI00004968.1  | Pre-mRNA-processing factor 19                                                  | 41.54854751 | 23.14249349 |
| 105 | IPI00216298.6  | Thioredoxin                                                                    | 40.90045071 | 24.13620567 |
| 106 | IPI00246975.8  | Glutathione S-transferase Mu 3                                                 | 40.52072382 | 16.22876978 |
| 107 | IPI00219078.5  | Isoform 1 of Sarcoplasmic/endoplasmic reticulum calcium ATPase 2               | 40.1899116  | 105.0190744 |
| 108 | IPI01017942.1  | cyclin-dependent kinase 1                                                      | 40.14090967 | 20.30771685 |
| 109 | IPI00965314.1  | ATP-binding cassette, sub-family E (OABP), member 1                            | 40.0531795  | 3.533854246 |
| 110 | IPI00981739.1  | tubulin folding cofactor A                                                     | 39.8813827  | 26.229635   |
| 111 | IPI00006980.1  | chromosome 14 open reading frame 166                                           | 39.82267761 | 26.09525371 |
| 112 | IPI00016342.1  | Ras-related protein Rab-7a                                                     | 39.55969405 | 56.70726061 |
| 113 | IPI00221093.7  | 40S ribosomal protein S17                                                      | 38.01497412 | 25.90276027 |
| 114 | IPI00015833.1  | Coiled-coil-helix-coiled-coil-helix domain-containing protein 3, mitochondrial | 37.96621513 | 28.57314563 |
| 115 | IPI00396321.1  | Leucine-rich repeat-containing protein 59                                      | 37.65153241 | 95.53281498 |
| 116 | IPI00215911.3  | DNA-(apurinic or apyrimidinic site) lyase                                      | 37.33648491 | 152.2553763 |
| 117 | IPI00953417.1  | tubulin, beta class I                                                          | 36.98217416 | 21.46094656 |
| 118 | IPI00008998.3  | 3-hydroxyacyl-CoA dehydratase 3                                                | 36.8838954  | 73.19380951 |
| 119 | IPI00002824.7  | Cysteine and glycine-rich protein 2                                            | 36.07404995 | 55.03849053 |
| 120 | IPI00515040.1  | Isoform 2 of Alpha N-terminal protein methyltransferase 1A                     | 35.88850784 | 27.32974958 |
| 121 | IPI00025273.1  | Isoform Long of Trifunctional purine biosynthetic protein adenosine            | 35.88418746 | 74.20943737 |
| 122 | IPI00643368.1  | Ras homolog gene family, member C                                              | 35.85121965 | 3.590638876 |
| 123 | IPI00807491.2  | Isoform 2 of General transcription factor 3C polypeptide 1                     | 35.73834395 | 7.998302937 |
| 124 | IPI00179330.6  | Ubiquitin-40S ribosomal protein S27a                                           | 35.43276453 | 19.45930576 |
| 125 | IPI00641437.1  | HEAT repeat containing 1                                                       | 35.142452   | 17.69447613 |
| 126 | IPI00008530.1  | 60S acidic ribosomal protein P0                                                | 34.72628856 | 111.2969279 |
| 127 | IPI00646304.4  | Peptidyl-prolyl cis-trans isomerase B                                          | 34.28955984 | 48.38023973 |
| 128 | IPI00220834.8  | X-ray repair cross-complementing protein 5                                     | 33.88251209 | 107.6939523 |
| 129 | IPI00910113.1  | cDNA FLJ52902, highly similar to Rab GDP dissociation inhibitor alpha          | 33.65728259 | 51.53565001 |
| 130 | IPI00024911.1  | Endoplasmic reticulum resident protein 29                                      | 33.55024695 | 7.204618931 |
| 131 | IPI00295098.3  | Signal recognition particle receptor subunit beta                              | 33.44176197 | 25.10525703 |
| 132 | IPI00413324.6  | 60S ribosomal protein L17                                                      | 33.39969826 | 55.80420852 |
| 133 | IPI00908896.2  | heterogeneous nuclear ribonucleoprotein H1 (H)                                 | 33.32276654 | 30.50481462 |
| 134 | IPI00156374.6  | Isoform 1 of Importin-4                                                        | 33.15105653 | 60.80217481 |
| 135 | IPI00032903.3  | Peptidyl-tRNA hydrolase 2, mitochondrial                                       | 33.08517528 | 37.90535879 |
| 136 | IPI00012074.3  | Isoform 1 of Heterogeneous nuclear ribonucleoprotein R                         | 32.83499622 | 55.09549785 |
| 137 | IPI00908754.1  | cDNA FLJ50714, moderately similar to Ras-related protein Rap-1b                | 32.82168961 | 53.55689955 |
| 138 | IPI00980410.1  | mitochondrial carrier 2                                                        | 32.69967675 | 34.56406307 |
| 139 | IPI00375513.3  | Isoform Soluble of Catechol O-methyltransferase                                | 32.68832779 | 27.21326852 |
| 140 | IPI00917575.2  | cDNA FLJ51046, highly similar to 60 kDa heat shock protein, mitochondrial      | 32.64225578 | 28.52809048 |

|     |                |                                                                     |             |             |
|-----|----------------|---------------------------------------------------------------------|-------------|-------------|
| 141 | IPI00001159.11 | Translational activator GCN1                                        | 32.41869712 | 85.26480722 |
| 142 | IPI00759663.1  | Isoform Cytoplasmic+peroxisomal of Peroxiredoxin-5, mitochondrial   | 32.32378983 | 30.06219959 |
| 143 | IPI00017672.4  | cDNA FLJ25678 fis, clone TST04067, highly similar to PURINE NUCLEOS | 32.2683475  | 15.28783107 |
| 144 | IPI00005024.3  | Isoform 1 of Myb-binding protein 1A                                 | 31.99996924 | 77.87896466 |
| 145 | IPI00003870.1  | Putative ATP-dependent Clp protease proteolytic subunit, mitochond  | 31.84814167 | 14.99601603 |
| 146 | IPI00018931.6  | Vacuolar protein sorting-associated protein 35                      | 31.56291461 | 47.37325096 |
| 147 | IPI00013180.2  | Protein BUD31 homolog                                               | 31.43726826 | 39.22823119 |
| 148 | IPI00219678.3  | Eukaryotic translation initiation factor 2 subunit 1                | 31.36786199 | 38.0262506  |
| 149 | IPI00073602.1  | Exosome complex component MTR3                                      | 31.27500772 | 15.42575288 |
| 150 | IPI00003815.3  | Rho GDP-dissociation inhibitor 1                                    | 31.23469472 | 24.02476215 |
| 151 | IPI00296913.1  | ADP-sugar pyrophosphatase                                           | 30.79156375 | 17.39159036 |
| 152 | IPI01014863.1  | Acetyl-CoA acetyltransferase, cytosolic                             | 30.49259949 | 22.96209049 |
| 153 | IPI00893541.1  | protein disulfide isomerase family A, member 3                      | 30.36398935 | 31.07933569 |
| 154 | IPI00297579.4  | Chromobox protein homolog 3                                         | 30.30350041 | 33.87606478 |
| 155 | IPI00292020.3  | Spermidine synthase                                                 | 30.29854989 | 14.65871668 |
| 156 | IPI00031691.1  | 60S ribosomal protein L9                                            | 29.98712397 | 36.02842021 |
| 157 | IPI00021347.1  | Ubiquitin-conjugating enzyme E2 L3                                  | 29.80865288 | 21.37869477 |
| 158 | IPI00028055.4  | Transmembrane emp24 domain-containing protein 10                    | 29.61652017 | 48.22544694 |
| 159 | IPI00293331.3  | Ribonucleases P/MRP protein subunit POP1                            | 29.48490858 | 33.2104609  |
| 160 | IPI00219153.4  | 60S ribosomal protein L22                                           | 29.35732174 | 18.14248013 |
| 161 | IPI00413641.7  | Aldose reductase                                                    | 29.30551267 | 78.07148504 |
| 162 | IPI00063242.6  | Isoform 2 of Serine/threonine-protein phosphatase PGAM5, mitochd    | 29.15536594 | 2.969429731 |
| 163 | IPI00007611.1  | ATP synthase subunit O, mitochondrial                               | 28.96623611 | 56.21613884 |
| 164 | IPI00792330.2  | ADP-ribosylation factor 4                                           | 28.81387091 | 39.91422415 |
| 165 | IPI00647400.1  | arginyl aminopeptidase (aminopeptidase B)                           | 28.38294697 | 52.35423279 |
| 166 | IPI00296370.2  | leucine carboxyl methyltransferase 1                                | 28.13103223 | 32.68146014 |
| 167 | IPI00219622.3  | Proteasome subunit alpha type-2                                     | 28.01113796 | 6.670053482 |
| 168 | IPI00984405.1  | DEAD (Asp-Glu-Ala-Asp) box helicase 5                               | 27.97559333 | 9.441040039 |
| 169 | IPI00182533.5  | 60S ribosomal protein L28                                           | 27.8903029  | 20.32191014 |
| 170 | IPI00221091.9  | 40S ribosomal protein S15a                                          | 27.87808824 | 26.42860079 |
| 171 | IPI00171199.5  | Isoform 2 of Proteasome subunit alpha type-3                        | 27.87724471 | 13.3510921  |
| 172 | IPI00010414.4  | PDZ and LIM domain protein 1                                        | 27.65128565 | 92.54963565 |
| 173 | IPI00003217.3  | Proteasome subunit beta type-7                                      | 27.62663984 | 14.19120789 |
| 174 | IPI00411706.1  | S-formylglutathione hydrolase                                       | 27.4816606  | 31.72799945 |
| 175 | IPI00306280.4  | Density-regulated protein                                           | 26.47071457 | 23.68208313 |
| 176 | IPI00218693.8  | Adenine phosphoribosyltransferase                                   | 26.11487603 | 40.49584842 |
| 177 | IPI00169413.1  | 28S ribosomal protein S34, mitochondrial                            | 25.91457605 | 19.98661828 |
| 178 | IPI00607799.5  | Isoform 1 of 3-hydroxybutyrate dehydrogenase type 2                 | 25.69540119 | 15.34840512 |
| 179 | IPI00878876.1  | cDNA FLJ51872, highly similar to Small nuclear ribonucleoprotein Sm | 25.57746196 | 15.92051387 |
| 180 | IPI00456940.5  | 60S ribosomal protein L7-like 1                                     | 25.47294021 | 14.533535   |
| 181 | IPI00030877.2  | 15 kDa selenoprotein isoform 1 precursor                            | 25.47280741 | 22.05384469 |
| 182 | IPI00218493.7  | Hypoxanthine-guanine phosphoribosyltransferase                      | 25.37085819 | 12.59149814 |
| 183 | IPI00003386.3  | E3 ubiquitin-protein ligase RBX1                                    | 25.28809643 | 20.6283741  |
| 184 | IPI00438229.2  | Isoform 1 of Transcription intermediary factor 1-beta               | 25.18329024 | 65.05789638 |
| 185 | IPI00260318.3  | cyclin-dependent kinase 2 isoform 2                                 | 25.16826892 | 10.64922738 |
| 186 | IPI00946221.1  | ribosomal protein L24                                               | 25.13393474 | 57.49180627 |
| 187 | IPI00003588.1  | Eukaryotic translation elongation factor 1 epsilon-1                | 25.08676624 | 28.65892458 |

|     |               |                                                                        |             |             |
|-----|---------------|------------------------------------------------------------------------|-------------|-------------|
| 188 | IPI00926851.1 | TRAM adaptor with GOLD domain isoform 2                                | 25.0576334  | 12.12693405 |
| 189 | IPI00895865.1 | electron transfer flavoprotein subunit alpha, mitochondrial isoform    | 25.02187204 | 20.30047679 |
| 190 | IPI00304612.9 | 60S ribosomal protein L13a                                             | 24.99991417 | 26.87083387 |
| 191 | IPI00219155.5 | 60S ribosomal protein L27                                              | 24.93350792 | 12.54528141 |
| 192 | IPI00300096.4 | Ras-related protein Rab-35                                             | 24.8862865  | 18.3901031  |
| 193 | IPI00940393.3 | EEF1A1 protein                                                         | 24.6656723  | 81.66274333 |
| 194 | IPI00655650.2 | 40S ribosomal protein S26                                              | 24.61743641 | 23.73561382 |
| 195 | IPI00025874.2 | Dolichyl-diphosphooligosaccharide--protein glycosyltransferase su      | 24.13459992 | 72.23646331 |
| 196 | IPI00013917.3 | 40S ribosomal protein S12                                              | 24.00824642 | 11.29956412 |
| 197 | IPI00007402.3 | Importin-7                                                             | 23.74324346 | 48.00437307 |
| 198 | IPI00555749.1 | Proteasome 26S ATPase subunit 5 variant (Fragment)                     | 23.71801162 | 43.66379905 |
| 199 | IPI01018104.1 | cDNA FLJ52561, highly similar to Four and a half LIM domains protei    | 23.61455297 | 15.67550874 |
| 200 | IPI01014503.1 | Uncharacterized protein                                                | 23.49908495 | 25.88044834 |
| 201 | IPI00007811.1 | Cyclin-dependent kinase 4                                              | 23.48174167 | 15.09010434 |
| 202 | IPI00873286.2 | cDNA FLJ55750, highly similar to Eukaryotic translation initiation fac | 23.45419812 | 11.49638867 |
| 203 | IPI00303722.5 | Protein FAM136A                                                        | 23.30880928 | 36.111835   |
| 204 | IPI00644674.1 | Cytosolic Fe-S cluster assembly factor NUBP2                           | 22.99330688 | 11.04510665 |
| 205 | IPI00021828.1 | Cystatin-B                                                             | 22.94549203 | 24.37318659 |
| 206 | IPI00006211.4 | Isoform 1 of Vesicle-associated membrane protein-associated prot       | 22.8651557  | 14.96650648 |
| 207 | IPI01013843.1 | cDNA FLJ59776, highly similar to Prefoldin subunit 3                   | 22.77480769 | 11.55967331 |
| 208 | IPI00027270.1 | 60S ribosomal protein L26                                              | 22.55340433 | 23.58366847 |
| 209 | IPI00011876.3 | cDNA FLJ59758, highly similar to S-methyl-5-thioadenosine phospho      | 22.38703632 | 16.71141124 |
| 210 | IPI00334907.3 | Isoform 1 of Phosphatidylinositol transfer protein beta isoform        | 22.3500936  | 65.49831676 |
| 211 | IPI01010050.1 | cDNA, FLJ78818, highly similar to Voltage-dependent anion-selective    | 22.23621225 | 5.225667953 |
| 212 | IPI00794911.3 | Coatomer subunit gamma                                                 | 22.19975686 | 17.72200608 |
| 213 | IPI00215719.6 | 60S ribosomal protein L18                                              | 22.1474607  | 27.57744861 |
| 214 | IPI00105598.3 | Proteasome 26S non-ATPase subunit 11 variant (Fragment)                | 22.03928852 | 6.919309378 |
| 215 | IPI00453473.6 | Histone H4                                                             | 21.98193645 | 11.90534139 |
| 216 | IPI00643504.1 | ring finger protein 2                                                  | 21.96214581 | 7.100060463 |
| 217 | IPI00456758.4 | 60S ribosomal protein L27a                                             | 21.87804031 | 19.38668346 |
| 218 | IPI00746438.2 | Isoform 2 of 60S ribosomal protein L11                                 | 21.80755496 | 29.98282504 |
| 219 | IPI01011782.1 | cDNA FLJ61430, highly similar to ATP-dependent RNA helicase DDX50      | 21.78792763 | 23.28930044 |
| 220 | IPI00017297.1 | Matrin-3                                                               | 21.75937772 | 42.7282083  |
| 221 | IPI00220667.3 | Isoform 4 of Hexokinase-1                                              | 21.74832654 | 58.12198567 |
| 222 | IPI01012526.1 | glucosidase, alpha; neutral AB                                         | 21.72934151 | 9.832138062 |
| 223 | IPI00026824.2 | Heme oxygenase 2                                                       | 21.72010708 | 72.25547433 |
| 224 | IPI00221325.3 | E3 SUMO-protein ligase RanBP2                                          | 21.49732208 | 30.0734508  |
| 225 | IPI00908723.1 | cDNA FLJ61039, highly similar to Stomatatin-like protein 2             | 21.48810863 | 18.12077689 |
| 226 | IPI00081836.3 | Histone H2A type 1-H                                                   | 21.4817996  | 25.64582062 |
| 227 | IPI00167941.1 | Midasin                                                                | 21.46257401 | 114.3588099 |
| 228 | IPI00429689.3 | Serine/threonine-protein phosphatase 2A catalytic subunit beta isc     | 21.41615653 | 101.8603373 |
| 229 | IPI00008380.1 | Serine/threonine-protein phosphatase 2A catalytic subunit alpha is     | 21.40297103 | 101.5836127 |
| 230 | IPI00294398.2 | Isoform 1 of Hydroxyacyl-coenzyme A dehydrogenase, mitochondrial       | 21.36481214 | 6.69530654  |
| 231 | IPI00006907.1 | Probable fructose-2,6-bisphosphatase TIGAR                             | 21.32082558 | 10.89680028 |
| 232 | IPI00016458.3 | Isoform 1 of L-2-hydroxyglutarate dehydrogenase, mitochondrial         | 21.23870134 | 15.10022569 |
| 233 | IPI00029079.5 | GMP synthase [glutamine-hydrolyzing]                                   | 21.20630789 | 37.17861724 |
| 234 | IPI00028004.2 | Proteasome subunit beta type-3                                         | 21.16501713 | 29.57798219 |

|     |                |                                                                        |             |             |
|-----|----------------|------------------------------------------------------------------------|-------------|-------------|
| 235 | IPI00795892.1  | profilin 2                                                             | 21.044034   | 18.24080682 |
| 236 | IPI00171611.7  | Histone H3.2                                                           | 20.88544345 | 28.79178953 |
| 237 | IPI00645138.2  | cDNA FLJ55652, highly similar to Nucleolar GTP-binding protein 1       | 20.81382537 | 48.12162352 |
| 238 | IPI00295485.4  | Heat shock 70 kDa protein 4L                                           | 20.73207259 | 50.60684347 |
| 239 | IPI00022018.1  | Dolichol-phosphate mannosyltransferase                                 | 20.72329092 | 19.41536641 |
| 240 | IPI00009342.1  | Ras GTPase-activating-like protein IQGAP1                              | 20.70216203 | 43.39088202 |
| 241 | IPI00220993.1  | Isoform CNPI of 2',3'-cyclic-nucleotide 3'-phosphodiesterase           | 20.66739511 | 24.2182169  |
| 242 | IPI00427330.3  | Ribosome maturation protein SBDS                                       | 20.5949223  | 2.973943233 |
| 243 | IPI00215790.6  | 60S ribosomal protein L38                                              | 20.52120352 | 11.53737783 |
| 244 | IPI00549885.4  | Isoform 2 of Pyruvate dehydrogenase E1 component subunit beta, m       | 20.50771928 | 63.37418199 |
| 245 | IPI00010153.5  | 60S ribosomal protein L23                                              | 20.50240135 | 12.92345476 |
| 246 | IPI01015295.1  | cDNA FLJ30049 fis, clone ADRGL1000033, highly similar to 26S proteas   | 20.48267412 | 10.43838573 |
| 247 | IPI00010271.3  | Isoform A of Ras-related C3 botulinum toxin substrate 1                | 20.18120885 | 35.11968374 |
| 248 | IPI00178440.3  | Elongation factor 1-beta                                               | 19.93448758 | 11.65764499 |
| 249 | IPI00445401.4  | Isoform 2 of E3 ubiquitin-protein ligase HUWE1                         | 19.93258858 | 129.8415353 |
| 250 | IPI00016513.5  | Ras-related protein Rab-10                                             | 19.7488091  | 37.5575211  |
| 251 | IPI00219358.7  | Isoform 1 of Mannose-6-phosphate isomerase                             | 19.56478715 | 13.99072981 |
| 252 | IPI00472633.7  | Isoform 3 of Transformer-2 protein homolog beta                        | 19.54099369 | 34.55797982 |
| 253 | IPI00170692.4  | Isoform 1 of Vesicle-associated membrane protein-associated prot       | 19.54041743 | 10.09439015 |
| 254 | IPI00012795.3  | Eukaryotic translation initiation factor 3 subunit I                   | 19.50349522 | 62.16252136 |
| 255 | IPI00019196.3  | Ribonuclease P protein subunit p30                                     | 19.37051654 | 13.54499817 |
| 256 | IPI00029631.1  | Enhancer of rudimentary homolog                                        | 19.35223317 | 10.10195589 |
| 257 | IPI00414168.1  | E3 ubiquitin-protein ligase MARCH5                                     | 19.35148454 | 10.86114836 |
| 258 | IPI00642046.1  | ribosomal L1 domain containing 1                                       | 19.30265665 | 42.51666975 |
| 259 | IPI00218728.4  | Isoform 1 of Platelet-activating factor acetylhydrolase IB subunit al  | 19.30063415 | 6.796374559 |
| 260 | IPI00978910.1  | Glia maturation factor beta                                            | 19.29461503 | 6.928934574 |
| 261 | IPI00020599.1  | Calreticulin                                                           | 19.22097254 | 58.32678366 |
| 262 | IPI00411937.4  | Nucleolar protein 56                                                   | 19.08992338 | 55.92416358 |
| 263 | IPI00789582.2  | cDNA FLJ51552, highly similar to Eukaryotic translation initiation fac | 19.07729435 | 21.82286453 |
| 264 | IPI00395887.4  | Thioredoxin-related transmembrane protein 1                            | 19.07211781 | 11.23121548 |
| 265 | IPI00916060.1  | DNA-directed RNA polymerase                                            | 19.04974222 | 38.15083671 |
| 266 | IPI00644531.1  | transgelin 2                                                           | 18.88507462 | 29.70350599 |
| 267 | IPI00003766.4  | Protein ETHE1, mitochondrial                                           | 18.88325882 | 3.126749754 |
| 268 | IPI01010461.1  | hypoxia up-regulated 1                                                 | 18.87546682 | 17.63665271 |
| 269 | IPI00026970.4  | FACT complex subunit SPT16                                             | 18.70021462 | 33.64892483 |
| 270 | IPI01010797.1  | cDNA, FLJ96158, highly similar to Homo sapiens calpain 2, (m/II) larg  | 18.66959786 | 30.85051012 |
| 271 | IPI00219757.13 | Glutathione S-transferase P                                            | 18.60493469 | 12.1351583  |
| 272 | IPI00971018.1  | Isoform 1 of TAR DNA-binding protein 43                                | 18.56664896 | 19.22315741 |
| 273 | IPI01012383.1  | OTU domain, ubiquitin aldehyde binding 1                               | 18.31986809 | 64.10212636 |
| 274 | IPI00000821.2  | 39S ribosomal protein L16, mitochondrial                               | 18.28165388 | 6.928866386 |
| 275 | IPI00012750.3  | 40S ribosomal protein S25                                              | 18.24493194 | 7.302073002 |
| 276 | IPI00025347.4  | Ribosomal RNA small subunit methyltransferase NEP1                     | 17.93830657 | 6.505105972 |
| 277 | IPI01014133.1  | cDNA FLJ32936 fis, clone TESTI2007533, highly similar to RuvB-like 2   | 17.87639046 | 30.22881627 |
| 278 | IPI00910754.1  | L-lactate dehydrogenase A chain isoform 2                              | 17.84153605 | 9.799121618 |
| 279 | IPI00017469.1  | Sepiapterin reductase                                                  | 17.78612185 | 8.42458725  |
| 280 | IPI00032808.1  | Ras-related protein Rab-3D                                             | 17.76695919 | 12.4209168  |
| 281 | IPI00016786.1  | Isoform 2 of Cell division control protein 42 homolog                  | 17.71056509 | 50.16028833 |

|     |               |                                                                           |             |             |
|-----|---------------|---------------------------------------------------------------------------|-------------|-------------|
| 282 | IPI00031169.1 | Ras-related protein Rab-2A                                                | 17.69229293 | 30.06599617 |
| 283 | IPI00917181.1 | Ribosomal protein L36a                                                    | 17.68854117 | 26.74609089 |
| 284 | IPI00003927.5 | Peptidyl-prolyl cis-trans isomerase D                                     | 17.65873814 | 11.56363511 |
| 285 | IPI00219077.4 | Isoform 1 of Leukotriene A-4 hydrolase                                    | 17.58453393 | 26.63442516 |
| 286 | IPI00556107.1 | DNA-3-methyladenine glycosylase isoform c                                 | 17.57844281 | 34.92022943 |
| 287 | IPI00029046.1 | Malectin                                                                  | 17.57364154 | 13.42012191 |
| 288 | IPI00219861.3 | Isoform 1 of Low molecular weight phosphotyrosine protein phosphatase     | 17.48403931 | 13.03783321 |
| 289 | IPI00794545.1 | deoxyuridine 5'-triphosphate nucleotidohydrolase, mitochondrial isoform 1 | 17.41640306 | 20.93088627 |
| 290 | IPI00185374.4 | 26S proteasome non-ATPase regulatory subunit 12                           | 17.37279034 | 18.54274511 |
| 291 | IPI00018783.1 | Inosine triphosphate pyrophosphatase                                      | 17.35806489 | 23.23776221 |
| 292 | IPI00023542.6 | Transmembrane emp24 domain-containing protein 9                           | 17.34732461 | 12.5365169  |
| 293 | IPI00014053.3 | Isoform 1 of Mitochondrial import receptor subunit TOM40 homolog          | 17.29182148 | 51.52494693 |
| 294 | IPI00025084.3 | Calpain small subunit 1                                                   | 17.26847553 | 11.42881656 |
| 295 | IPI00303954.3 | cytochrome b5 type B precursor                                            | 17.2508781  | 32.84485555 |
| 296 | IPI00868999.1 | Similar to Acidic ribosomal phosphoprotein P0                             | 17.19005585 | 6.193804741 |
| 297 | IPI00942944.1 | protein DEK isoform 2                                                     | 17.0475266  | 18.61816978 |
| 298 | IPI00005692.1 | 28S ribosomal protein S12, mitochondrial                                  | 16.97285175 | 8.977897167 |
| 299 | IPI00013167.1 | 28S ribosomal protein S25, mitochondrial                                  | 16.91688275 | 26.91265559 |
| 300 | IPI00023406.1 | Cytochrome c-type heme lyase                                              | 16.86869431 | 6.956211329 |
| 301 | IPI00396329.1 | Ribosome production factor 2 homolog                                      | 16.69620633 | 50.31776333 |
| 302 | IPI00023647.4 | Isoform 1 of Ubiquitin-like modifier-activating enzyme 6                  | 16.67186379 | 36.5750742  |
| 303 | IPI00062866.4 | Isoform 1 of Zinc finger CCCH-type antiviral protein 1-like               | 16.60305166 | 32.87110829 |
| 304 | IPI00925601.1 | 5-aminoimidazole-4-carboxamide ribonucleotide formyltransferase           | 16.5197804  | 27.30317044 |
| 305 | IPI00024821.1 | 26S proteasome non-ATPase regulatory subunit 14                           | 16.49425149 | 46.22907114 |
| 306 | IPI00410324.2 | Isoform 1 of Protein LSM12 homolog                                        | 16.34122086 | 7.410131693 |
| 307 | IPI00879638.2 | cDNA FLJ58652, highly similar to Probable ATP-dependent RNA helicase      | 16.28180313 | 8.521591902 |
| 308 | IPI00005107.2 | Niemann-Pick C1 protein                                                   | 16.24896646 | 37.4597559  |
| 309 | IPI00219365.3 | Moesin                                                                    | 16.2058394  | 30.11094594 |
| 310 | IPI01011282.1 | 23 kDa protein                                                            | 16.15997243 | 13.28340149 |
| 311 | IPI00168184.8 | cDNA FLJ56053, highly similar to Serine/threonine-protein phosphatase     | 16.04391837 | 5.994200945 |
| 312 | IPI01011132.1 | Isoform 1 of DNA topoisomerase 2-alpha                                    | 16.02649283 | 47.97874737 |
| 313 | IPI00023064.1 | NADH dehydrogenase [ubiquinone] 1 alpha subcomplex assembly factor        | 16.00889349 | 19.44897747 |
| 314 | IPI00916802.1 | Sjogren syndrome antigen B (autoantigen La)                               | 15.84578443 | 21.62210894 |
| 315 | IPI00017283.2 | Isoleucyl-tRNA synthetase, mitochondrial                                  | 15.54805946 | 79.32804489 |
| 316 | IPI00021095.1 | Protein Mis18-alpha                                                       | 15.43418527 | 11.97754002 |
| 317 | IPI00216057.6 | Sorbitol dehydrogenase                                                    | 15.38418078 | 16.8930974  |
| 318 | IPI00640037.2 | cDNA FLJ38496 fis, clone FELIV1000137, highly similar to 60S RIBOSOMAL    | 15.3722167  | 7.36440134  |
| 319 | IPI00297241.4 | Nucleolar pre-ribosomal-associated protein 1                              | 15.26629472 | 64.38480663 |
| 320 | IPI00383680.3 | dolichyl-diphosphooligosaccharide--protein glycosyltransferase subunit    | 15.2184515  | 21.20480132 |
| 321 | IPI00060031.3 | ADP-ribosylation factor-like protein 8A                                   | 15.20935559 | 36.73852849 |
| 322 | IPI00398774.3 | Isoform 2 of Mps one binder kinase activator-like 3                       | 15.13529372 | 12.17595506 |
| 323 | IPI00909577.1 | cDNA FLJ52894, highly similar to Isocitrate dehydrogenase                 | 15.11244202 | 20.18908143 |
| 324 | IPI00185503.4 | Isoform 2 of ATP-binding cassette sub-family D member 3                   | 14.98766041 | 30.74609566 |
| 325 | IPI00411765.3 | Isoform 2 of 14-3-3 protein sigma                                         | 14.98706102 | 9.002167463 |
| 326 | IPI00640703.3 | Exportin-5                                                                | 14.95011711 | 25.50934196 |
| 327 | IPI00239077.5 | Histidine triad nucleotide-binding protein 1                              | 14.87256193 | 6.230341673 |
| 328 | IPI00219575.5 | Bleomycin hydrolase                                                       | 14.86099052 | 4.411576271 |

|     |                |                                                                                 |             |             |
|-----|----------------|---------------------------------------------------------------------------------|-------------|-------------|
| 329 | IPI00924816.1  | Myotrophin                                                                      | 14.80269027 | 25.96178555 |
| 330 | IPI01013052.1  | caspase 12 (gene/pseudogene)                                                    | 14.80241656 | 20.2420795  |
| 331 | IPI00910164.1  | cDNA FLJ53381, highly similar to Monocarboxylate transporter 1                  | 14.7109592  | 40.8945055  |
| 332 | IPI00760588.2  | Isoform 5 of Double-stranded RNA-specific adenosine deaminase                   | 14.69395542 | 33.06698012 |
| 333 | IPI00740142.2  | u5 small nuclear ribonucleoprotein 200 kDa helicase-like, partial               | 14.67643595 | 13.38677335 |
| 334 | IPI00304932.2  | Ribosomal RNA-processing protein 8                                              | 14.64496183 | 28.81081104 |
| 335 | IPI00029629.4  | E3 ubiquitin/ISG15 ligase TRIM25                                                | 14.55224824 | 41.33140135 |
| 336 | IPI00021785.2  | Cytochrome c oxidase subunit 5B, mitochondrial                                  | 14.54167295 | 11.38466263 |
| 337 | IPI00737530.1  | actin-related protein 2/3 complex subunit 1B-like                               | 14.47739291 | 17.5527246  |
| 338 | IPI00218568.7  | Pterin-4-alpha-carbinolamine dehydratase                                        | 14.44081759 | 15.21335578 |
| 339 | IPI00479722.2  | Proteasome activator complex subunit 1                                          | 14.4245286  | 8.93192625  |
| 340 | IPI00646605.3  | Isoform 3 of E3 ubiquitin-protein ligase UBR4                                   | 14.39617968 | 55.55451703 |
| 341 | IPI00953109.2  | Isoform 6 of Filamin-B                                                          | 14.38293767 | 103.4262052 |
| 342 | IPI00012315.2  | Nucleoside diphosphate kinase 3                                                 | 14.35925961 | 7.999052525 |
| 343 | IPI01009435.1  | THO complex subunit 2                                                           | 14.33485222 | 37.97984362 |
| 344 | IPI00853337.1  | ADP-ribosylation factor 5                                                       | 14.32359123 | 26.4231627  |
| 345 | IPI00022597.1  | NEDD8-conjugating enzyme Ubc12                                                  | 14.31094575 | 18.13961244 |
| 346 | IPI00984586.1  | trypsin-3 isoform 4 preproprotein                                               | 14.28379822 | 2.935996056 |
| 347 | IPI00246058.10 | Programmed cell death 6-interacting protein                                     | 14.27806425 | 29.39755034 |
| 348 | IPI00099996.2  | Mitochondrial ribonuclease P protein 1                                          | 14.25307441 | 11.43853045 |
| 349 | IPI00059764.4  | Isoform 1 of Zinc finger protein 428                                            | 14.14135289 | 3.339945316 |
| 350 | IPI00658013.1  | nucleophosmin isoform 3                                                         | 14.14046288 | 23.19569707 |
| 351 | IPI00017381.1  | Replication factor C subunit 4                                                  | 14.09888244 | 13.64978266 |
| 352 | IPI00017799.5  | cDNA FLJ55158, highly similar to Thioredoxin, mitochondrial                     | 14.06674433 | 3.320490599 |
| 353 | IPI01015100.1  | Membrane-associated progesterone receptor component 2                           | 14.04842472 | 12.71248055 |
| 354 | IPI00220648.5  | Phosphomevalonate kinase                                                        | 13.97088099 | 8.992396593 |
| 355 | IPI00947020.2  | Ras homolog enriched in brain                                                   | 13.71872401 | 11.95468044 |
| 356 | IPI00024157.1  | Peptidyl-prolyl cis-trans isomerase FKBP3                                       | 13.6936903  | 3.0353055   |
| 357 | IPI00604652.1  | NEDD8-activating enzyme E1 regulatory subunit isoform c                         | 13.66355371 | 18.91427255 |
| 358 | IPI00329301.3  | Isoform 1 of NADH dehydrogenase [ubiquinone] 1 alpha subcomplex                 | 13.64425278 | 16.18613505 |
| 359 | IPI00893703.1  | ribosomal protein S7                                                            | 13.64069605 | 17.02438021 |
| 360 | IPI00152695.2  | WD repeat-containing protein 82                                                 | 13.63987303 | 20.23001885 |
| 361 | IPI00290543.5  | Isoform 1 of Nuclear protein localization protein 4 homolog                     | 13.63589573 | 27.5719955  |
| 362 | IPI00909694.2  | alpha-aminoadipic semialdehyde dehydrogenase isoform 3                          | 13.55945539 | 6.823871851 |
| 363 | IPI00940720.2  | PARP1 protein (Fragment)                                                        | 13.53916049 | 12.79487371 |
| 364 | IPI00004165.1  | Fos39347_1                                                                      | 13.52875137 | 3.22106123  |
| 365 | IPI00550852.4  | Isoform 1 of Dynactin subunit 4                                                 | 13.52199078 | 29.76708961 |
| 366 | IPI00017510.3  | Cytochrome c oxidase subunit 2                                                  | 13.47459793 | 16.73841619 |
| 367 | IPI00927715.1  | Ribosomal protein L15                                                           | 13.45742917 | 15.7077837  |
| 368 | IPI00927892.1  | Mitochondrial-processing peptidase subunit beta                                 | 13.39058852 | 23.17147756 |
| 369 | IPI00976817.1  | poly-U binding splicing factor 60KDa                                            | 13.3136878  | 5.053713322 |
| 370 | IPI00011694.1  | Trypsin-1                                                                       | 13.29701853 | 25.8478961  |
| 371 | IPI00916474.2  | mannosyl-oligosaccharide glucosidase isoform 2                                  | 13.23869753 | 27.74307871 |
| 372 | IPI00031647.2  | Programmed cell death protein 2-like                                            | 13.20120621 | 12.38316584 |
| 373 | IPI00443909.1  | Isoform 1 of Protein canopy homolog 2                                           | 13.19260883 | 15.38165808 |
| 374 | IPI01010565.1  | cDNA FLJ51063, highly similar to Dihydrolipeoyllysine-residue acetyltransferase | 13.17704034 | 3.651170254 |
| 375 | IPI01015427.1  | cDNA FLJ58247, highly similar to 26S protease regulatory subunit 4              | 13.14909625 | 7.447316885 |

|     |               |                                                                        |             |             |
|-----|---------------|------------------------------------------------------------------------|-------------|-------------|
| 376 | IPI00011916.1 | Aminoacyl tRNA synthase complex-interacting multifunctional prote      | 13.07555175 | 26.68466663 |
| 377 | IPI00007694.5 | Isoform 1 of Protein phosphatase methylesterase 1                      | 13.06180024 | 12.27838659 |
| 378 | IPI00005161.3 | Actin-related protein 2/3 complex subunit 2                            | 13.05300403 | 13.93984199 |
| 379 | IPI00793205.1 | cDNA FLJ56571, highly similar to Splicing factor, arginine/serine-rich | 13.04667401 | 2.993952513 |
| 380 | IPI01013544.1 | cDNA FLJ54328, highly similar to Heat shock 70 kDa protein 1           | 13.04402208 | 75.04023147 |
| 381 | IPI00014577.1 | Ras-related protein Rab-18                                             | 12.96826291 | 18.26451421 |
| 382 | IPI00795257.3 | Glyceraldehyde-3-phosphate dehydrogenase                               | 12.95435119 | 42.29723239 |
| 383 | IPI00917605.1 | cytochrome c, somatic                                                  | 12.88886666 | 11.01686788 |
| 384 | IPI00216293.6 | Thiosulfate sulfurtransferase                                          | 12.8551867  | 2.791210413 |
| 385 | IPI00019326.1 | Adrenodoxin, mitochondrial                                             | 12.77173233 | 8.928052902 |
| 386 | IPI00009253.2 | Alpha-soluble NSF attachment protein                                   | 12.71969557 | 2.872599125 |
| 387 | IPI00018671.1 | Dual specificity protein phosphatase 3                                 | 12.64930868 | 18.46640468 |
| 388 | IPI00973816.1 | proteasome (prosome, macropain) 26S subunit, non-ATPase, 13            | 12.64352679 | 27.08849835 |
| 389 | IPI01013402.1 | cDNA FLJ46429 fis, clone THYMU3014372, highly similar to DNA replic    | 12.61844373 | 40.9428072  |
| 390 | IPI00643876.2 | cDNA FLJ50466, highly similar to DNA (cytosine-5)-methyltransferase    | 12.58668089 | 15.16066217 |
| 391 | IPI00025156.4 | Isoform 1 of E3 ubiquitin-protein ligase CHIP                          | 12.58575606 | 8.156795502 |
| 392 | IPI00745893.2 | small ubiquitin-related modifier 2 isoform b precursor                 | 12.5713799  | 6.090990543 |
| 393 | IPI00005050.1 | 28S ribosomal protein S14, mitochondrial                               | 12.56365681 | 8.25626111  |
| 394 | IPI00292135.1 | Lamin-B receptor                                                       | 12.54350257 | 22.18463612 |
| 395 | IPI00645869.1 | Isoform 2 of Protein LAS1 homolog                                      | 12.4950614  | 15.71039009 |
| 396 | IPI00554521.2 | Ferritin heavy chain                                                   | 12.49393749 | 31.01583433 |
| 397 | IPI00645898.3 | X-prolyl aminopeptidase (Aminopeptidase P) 1, soluble                  | 12.43623996 | 21.54259062 |
| 398 | IPI00011997.4 | chromosome 8 open reading frame 33                                     | 12.41482973 | 3.802040815 |
| 399 | IPI00029266.1 | Small nuclear ribonucleoprotein E                                      | 12.33372808 | 12.59852314 |
| 400 | IPI00794746.1 | Uncharacterized protein                                                | 12.33148813 | 6.071681738 |
| 401 | IPI00945960.1 | signal sequence receptor, gamma (translocon-associated protein ga      | 12.29565358 | 12.55513477 |
| 402 | IPI00005705.1 | Isoform Gamma-1 of Serine/threonine-protein phosphatase PP1-ga         | 12.20368648 | 62.51254654 |
| 403 | IPI00966877.1 | tRNA (cytosine-5)-methyltransferase NSUN2 isoform 2                    | 12.2026782  | 27.62003875 |
| 404 | IPI00025340.3 | Pyridoxal phosphate phosphatase                                        | 12.19011784 | 6.942385197 |
| 405 | IPI01014044.1 | Isoform 1 of NADH dehydrogenase [ubiquinone] 1 beta subcomplex         | 12.06624794 | 12.12593031 |
| 406 | IPI00020510.1 | CDGSH iron-sulfur domain-containing protein 1                          | 12.0614717  | 8.634587288 |
| 407 | IPI00965541.1 | CCHC-type zinc finger, nucleic acid binding protein                    | 11.95422387 | 13.28625417 |
| 408 | IPI00480093.6 | ERO1-like beta                                                         | 11.92051363 | 6.071348906 |
| 409 | IPI00927582.2 | Isoform 5 of Serrate RNA effector molecule homolog                     | 11.88848162 | 30.37669873 |
| 410 | IPI00979721.1 | Isoform 3 of Mini-chromosome maintenance complex-binding prote         | 11.88371491 | 12.42308044 |
| 411 | IPI00218054.2 | Selenoprotein H                                                        | 11.86993909 | 5.228617668 |
| 412 | IPI00788938.1 | L-lactate dehydrogenase                                                | 11.76095319 | 35.13553357 |
| 413 | IPI00028481.1 | Ras-related protein Rab-8A                                             | 11.74769545 | 19.31895494 |
| 414 | IPI00154590.6 | MKI67 FHA domain-interacting nucleolar phosphoprotein                  | 11.72099137 | 55.91034389 |
| 415 | IPI00001655.1 | chromosome 16 open reading frame 80                                    | 11.67676139 | 15.90857196 |
| 416 | IPI00166483.2 | transmembrane protein 256                                              | 11.63630533 | 6.518399239 |
| 417 | IPI00798211.1 | tubulin folding cofactor B                                             | 11.49359608 | 11.63812995 |
| 418 | IPI00930694.1 | insulin-like growth factor 2 mRNA-binding protein 1 isoform 2          | 11.47464442 | 9.614244461 |
| 419 | IPI00028277.8 | Isoform 1 of Alpha-ketoglutarate-dependent dioxygenase FTO             | 11.45226812 | 10.07923675 |
| 420 | IPI00219512.2 | Isoform 2 of Ubiquitin carboxyl-terminal hydrolase isozyme L5          | 11.39187741 | 20.55851364 |
| 421 | IPI00298961.3 | Exportin-1                                                             | 11.3826592  | 52.11610389 |
| 422 | IPI01013273.1 | cDNA, FLJ79129, highly similar to T-complex protein 1 subunit zeta     | 11.35524893 | 7.006772041 |



|     |                |                                                                        |             |             |
|-----|----------------|------------------------------------------------------------------------|-------------|-------------|
| 423 | IPI00793102.1  | ribosomal protein L35a                                                 | 11.35146785 | 12.99345636 |
| 424 | IPI00016597.3  | Ceroid-lipofuscinosis neuronal protein 6                               | 11.30901694 | 7.689606667 |
| 425 | IPI01015738.1  | Alpha actinin 4 short isoform                                          | 11.29110169 | 6.77367425  |
| 426 | IPI00759659.1  | Isoform 2 of Golgi membrane protein 1                                  | 11.22557688 | 6.926651716 |
| 427 | IPI00909691.1  | cDNA FLJ50174, highly similar to Homo sapiens SNARE protein Ykt6 (N    | 11.2249918  | 6.76971817  |
| 428 | IPI00910422.2  | cDNA FLJ52802, highly similar to Eukaryotic translation initiation fac | 11.21058941 | 17.07328272 |
| 429 | IPI01011335.1  | cDNA FLJ60435, highly similar to Heterogeneous nuclear ribonucleop     | 11.08753657 | 17.91938734 |
| 430 | IPI00217413.3  | ATP-dependent RNA helicase DHX29                                       | 11.08337402 | 18.55859256 |
| 431 | IPI00910455.1  | cDNA FLJ60259, highly similar to Elongation factor Ts, mitochondrial   | 11.05444479 | 6.411585569 |
| 432 | IPI00100460.2  | Aspartyl-tRNA synthetase, mitochondrial                                | 11.03229046 | 27.18651175 |
| 433 | IPI00250297.3  | L-aminoadipate-semialdehyde dehydrogenase-phosphopantethein            | 11.0196867  | 31.70700741 |
| 434 | IPI00290416.3  | Isoform 1 of Obg-like ATPase 1                                         | 11.0009377  | 15.52790523 |
| 435 | IPI00414347.2  | Isoform 2 of Ankyrin repeat and SOCS box protein 18                    | 10.96737456 | 2.774348736 |
| 436 | IPI00171665.1  | Nucleoporin Nup37                                                      | 10.9279871  | 10.40621829 |
| 437 | IPI00984414.2  | Elongation factor 1-alpha                                              | 10.92542124 | 18.99169207 |
| 438 | IPI00908662.2  | ribosomal protein L4                                                   | 10.87329102 | 3.33714366  |
| 439 | IPI00003949.1  | Ubiquitin-conjugating enzyme E2 N                                      | 10.85238695 | 7.103901386 |
| 440 | IPI00215920.8  | ADP-ribosylation factor 6                                              | 10.78922439 | 8.970561504 |
| 441 | IPI00002902.5  | Polynucleotide 5'-hydroxyl-kinase NOL9                                 | 10.75507736 | 23.95106339 |
| 442 | IPI00910298.1  | cDNA FLJ56236, highly similar to Exportin-2                            | 10.71265221 | 14.08889389 |
| 443 | IPI01009326.1  | cDNA FLJ53379, highly similar to T-complex protein 1 subunit theta     | 10.65254021 | 9.490504503 |
| 444 | IPI00100656.3  | Isoform 1 of Trans-2,3-enoyl-CoA reductase                             | 10.63536382 | 10.27974463 |
| 445 | IPI00178431.12 | ATP-dependent DNA helicase Q1                                          | 10.52583528 | 25.62801909 |
| 446 | IPI00011250.3  | Ubiquitin carboxyl-terminal hydrolase isozyme L3                       | 10.51327205 | 2.848175764 |
| 447 | IPI00003968.1  | NADH dehydrogenase [ubiquinone] 1 alpha subcomplex subunit 9, r        | 10.48416424 | 22.29064155 |
| 448 | IPI00792023.2  | Ariadne homolog 2 variant (Fragment)                                   | 10.43514371 | 8.87221384  |
| 449 | IPI00788612.2  | LIM and senescent cell antigen-like-containing domain protein 1        | 10.40838933 | 54.09051752 |
| 450 | IPI01015006.1  | cDNA FLJ14416 fis, clone HEMBA1005202, highly similar to SIGNAL REC    | 10.32061744 | 26.9031744  |
| 451 | IPI00984941.1  | lysophospholipase I                                                    | 10.24244213 | 12.11687398 |
| 452 | IPI01010794.1  | THO complex subunit 4                                                  | 10.18708611 | 7.619431019 |
| 453 | IPI00167549.3  | ADP-ribosylation factor-like 14 effector protein                       | 10.16257095 | 2.859004498 |
| 454 | IPI00299084.1  | Transmembrane protein 33                                               | 10.13495803 | 16.83365798 |
| 455 | IPI00980668.1  | heterogeneous nuclear ribonucleoprotein H1 (H)                         | 10.12468576 | 11.15116978 |
| 456 | IPI00555878.1  | Probable DNA dC->dU-editing enzyme APOBEC-3C                           | 10.09930563 | 12.15285873 |
| 457 | IPI00741996.9  | KM-PA-2 protein                                                        | 10.09748459 | 51.81624365 |
| 458 | IPI00000006.1  | GTPase HRas                                                            | 10.09243774 | 15.75251102 |
| 459 | IPI00744692.1  | Transaldolase                                                          | 10.09027243 | 24.16368175 |
| 460 | IPI00015956.3  | Exosome complex component RRP40                                        | 10.0793612  | 6.181510687 |
| 461 | IPI00373882.2  | replication factor C subunit 3 isoform 2                               | 10.07904959 | 6.745334148 |
| 462 | IPI00645646.1  | 17 kDa protein                                                         | 9.952640533 | 15.1362884  |
| 463 | IPI00793232.1  | cDNA FLJ59109, highly similar to Pyridoxine-5'-phosphate oxidase       | 9.920525074 | 3.588242531 |
| 464 | IPI00218857.1  | Isoform 1 of Dual specificity mitogen-activated protein kinase kinas   | 9.890594721 | 3.283116579 |
| 465 | IPI00294943.1  | Protein ariadne-1 homolog                                              | 9.876232147 | 18.67661929 |
| 466 | IPI00926585.1  | eukaryotic translation elongation factor 1 beta 2                      | 9.847770691 | 3.480661154 |
| 467 | IPI00021266.1  | 60S ribosomal protein L23a                                             | 9.834607363 | 17.05376267 |
| 468 | IPI00909181.1  | GrpE protein homolog                                                   | 9.780870676 | 6.555705309 |
| 469 | IPI00020602.1  | Casein kinase II subunit alpha'                                        | 9.737714052 | 5.432087421 |

|     |               |                                                                      |             |             |
|-----|---------------|----------------------------------------------------------------------|-------------|-------------|
| 470 | IPI00927255.1 | LanC lantibiotic synthetase component C-like 1 (bacterial)           | 9.692457914 | 16.40298176 |
| 471 | IPI01012426.1 | RAP1B, member of RAS oncogene family                                 | 9.666450977 | 2.987706423 |
| 472 | IPI00759596.1 | Isoform 4 of Heterogeneous nuclear ribonucleoproteins C1/C2          | 9.631971359 | 8.547278166 |
| 473 | IPI00184525.2 | Isoform 2 of Methylthioribose-1-phosphate isomerase                  | 9.610852718 | 3.093814373 |
| 474 | IPI00019912.3 | Peroxisomal multifunctional enzyme type 2                            | 9.566012144 | 22.61170793 |
| 475 | IPI00847986.1 | Isoform 2 of 40S ribosomal protein S24                               | 9.536608696 | 15.47692728 |
| 476 | IPI00939558.2 | cDNA FLJ38696 fis, clone KIDNE2001931, highly similar to HETEROGEN   | 9.513035297 | 12.05787754 |
| 477 | IPI00397904.6 | Nuclear pore complex protein Nup93                                   | 9.509429932 | 32.65908766 |
| 478 | IPI00006113.1 | DNA-directed RNA polymerase II subunit RPB9                          | 9.481889009 | 9.967593908 |
| 479 | IPI00641665.1 | interleukin enhancer binding factor 2, 45kDa                         | 9.44649291  | 10.82668447 |
| 480 | IPI00329600.3 | Probable saccharopine dehydrogenase                                  | 9.4371171   | 9.199316978 |
| 481 | IPI00100984.4 | Isoform 1 of HEAT repeat-containing protein 3                        | 9.334487915 | 10.81985712 |
| 482 | IPI00967562.1 | heterogeneous nuclear ribonucleoprotein D (AU-rich element RNA b     | 9.321878672 | 5.888921976 |
| 483 | IPI00939491.1 | Isoform 2 of Cysteinyl-tRNA synthetase, cytoplasmic                  | 9.261469126 | 46.16977072 |
| 484 | IPI00963816.1 | phosphoribosylaminoimidazole carboxylase, phosphoribosylamino        | 9.248252392 | 7.062841654 |
| 485 | IPI00012353.1 | 39S ribosomal protein L3, mitochondrial                              | 9.221636057 | 23.34996629 |
| 486 | IPI00215974.2 | Queuine tRNA-ribosyltransferase                                      | 9.1964674   | 15.76839066 |
| 487 | IPI00556157.1 | Polypyrimidine tract-binding protein 1 isoform c variant (Fragment)  | 9.12130475  | 5.903226376 |
| 488 | IPI00910419.1 | cDNA FLJ52929, highly similar to Dolichyl-diphosphooligosaccharide   | 9.084523201 | 6.170256138 |
| 489 | IPI00983417.1 | CD59 molecule, complement regulatory protein                         | 9.036623478 | 9.638309956 |
| 490 | IPI00152912.1 | Isoform B of Ectodysplasin-A receptor-associated adapter protein     | 9.005042553 | 4.228182316 |
| 491 | IPI00893580.1 | HLA-B associated transcript 1                                        | 8.983823538 | 17.40922332 |
| 492 | IPI00921560.2 | Isoform 2 of Polycomb group RING finger protein 1                    | 8.963470936 | 3.294580221 |
| 493 | IPI00155601.1 | MACRO domain-containing protein 1                                    | 8.959338903 | 3.539744139 |
| 494 | IPI01011575.1 | cDNA FLJ60080, highly similar to 130 kDa leucine-rich protein (Fragm | 8.913601875 | 12.86030412 |
| 495 | IPI00924895.1 | SNRPG protein                                                        | 8.880480289 | 8.205285788 |
| 496 | IPI00514956.1 | Rab geranylgeranyltransferase, beta subunit                          | 8.827101946 | 10.16696143 |
| 497 | IPI00016746.1 | Isoform 1 of Core-binding factor subunit beta                        | 8.752801418 | 4.835932732 |
| 498 | IPI00398131.4 | Isoform 1 of Protein lin-28 homolog B                                | 8.721138    | 40.98487496 |
| 499 | IPI00382459.1 | Isoform 3 of Cullin-3                                                | 8.651211977 | 7.626033545 |
| 500 | IPI00642213.1 | RNA binding protein, autoantigenic                                   | 8.526372194 | 18.50947499 |
| 501 | IPI00184884.6 | Non-structural maintenance of chromosomes element 1 homolog          | 8.472459793 | 3.866527081 |
| 502 | IPI00037448.3 | Glyoxylate reductase/hydroxypyruvate reductase                       | 8.332123518 | 37.4287343  |
| 503 | IPI00334282.2 | Protein FAM3C                                                        | 8.316915274 | 6.036994934 |
| 504 | IPI00847896.1 | Similar to Glutamate-rich WD repeat-containing protein 1             | 8.295090675 | 10.13525772 |
| 505 | IPI00025086.4 | Cytochrome c oxidase subunit 5A, mitochondrial                       | 8.239332438 | 6.078767776 |
| 506 | IPI00031106.1 | Proteasome assembly chaperone 3                                      | 8.186425209 | 4.018624306 |
| 507 | IPI00910980.1 | IARS protein                                                         | 8.16508317  | 13.75889993 |
| 508 | IPI00927674.1 | cDNA FLJ51867, highly similar to Ras-related protein Rab-5A          | 8.127687931 | 4.493696213 |
| 509 | IPI00783302.1 | Isoform 1 of Pentatricopeptide repeat-containing protein 3, mitoch   | 8.112862825 | 11.22996235 |
| 510 | IPI00747810.3 | fascin homolog 1, actin-bundling protein (Strongylocentrotus purpur  | 8.111647129 | 11.07534266 |
| 511 | IPI00514399.1 | ribosomal protein S27                                                | 8.091253519 | 18.15767574 |
| 512 | IPI00007175.3 | Isoform 1 of 60S ribosome subunit biogenesis protein NIP7 homolog    | 8.060260534 | 15.19271469 |
| 513 | IPI00954146.2 | cDNA FLJ31682 fis, clone NT2RI2005335, highly similar to MMS19-like  | 7.972952843 | 14.81135249 |
| 514 | IPI00943181.1 | proteasome (prosome, macropain) activator subunit 2 (PA28 beta)      | 7.944501638 | 6.811487913 |
| 515 | IPI00336094.5 | Isoform 2 of 3-hydroxyacyl-CoA dehydrogenase type-2                  | 7.888287306 | 8.275798321 |
| 516 | IPI00008438.1 | 40S ribosomal protein S10                                            | 7.886199474 | 11.52813387 |

|     |               |                                                                          |             |             |
|-----|---------------|--------------------------------------------------------------------------|-------------|-------------|
| 517 | IPI00014198.3 | Exosome complex component RRP42                                          | 7.845750332 | 23.2186923  |
| 518 | IPI00170972.2 | UPF0553 protein C9orf64                                                  | 7.828207016 | 19.82426786 |
| 519 | IPI00965022.1 | ring finger and CHY zinc finger domain containing 1, E3 ubiquitin pro    | 7.766227722 | 2.837225437 |
| 520 | IPI00394982.1 | DEAD (Asp-Glu-Ala-Asp) box polypeptide 52                                | 7.727472305 | 24.68902898 |
| 521 | IPI01011073.1 | cDNA FLJ55446, highly similar to Superkiller viralicidic activity 2-like | 7.663134575 | 18.66403675 |
| 522 | IPI00011770.1 | NADH dehydrogenase [ubiquinone] 1 alpha subcomplex subunit 4             | 7.633547544 | 11.51311016 |
| 523 | IPI00784161.1 | Isoform 1 of Transcription elongation factor SPT6                        | 7.614886999 | 15.28077078 |
| 524 | IPI00009471.1 | WD repeat-containing protein 3                                           | 7.614540577 | 35.85176802 |
| 525 | IPI00016372.1 | Ras-related protein Rab-9A                                               | 7.587427855 | 7.753925085 |
| 526 | IPI00412714.3 | Isoform 4 of Plasminogen activator inhibitor 1 RNA-binding protein       | 7.568902731 | 13.90614605 |
| 527 | IPI00908317.2 | ring finger protein 114                                                  | 7.559832811 | 2.772971153 |
| 528 | IPI00973067.1 | P450 (cytochrome) oxidoreductase                                         | 7.506262779 | 11.68334246 |
| 529 | IPI00977430.1 | cDNA, FLJ79286, highly similar to T-complex protein 1 subunit gamma      | 7.426075459 | 67.55640221 |
| 530 | IPI00220919.1 | Isoform 3 of DNA (cytosine-5)-methyltransferase 1                        | 7.415436745 | 29.40709066 |
| 531 | IPI00025178.3 | Pre-mRNA-splicing factor SPF27                                           | 7.403060198 | 8.553205252 |
| 532 | IPI00010218.1 | Cytochrome P450 monooxygenase                                            | 7.382110596 | 8.127945662 |
| 533 | IPI00413958.5 | Isoform 2 of Filamin-C                                                   | 7.362661839 | 6.055697441 |
| 534 | IPI00646783.2 | TRMT1-like protein isoform 2                                             | 7.26845789  | 11.58942533 |
| 535 | IPI00979604.1 | ribosomal protein S3                                                     | 7.249117374 | 10.05483961 |
| 536 | IPI00010418.6 | Isoform 2 of Myosin-Ic                                                   | 7.232308149 | 5.530830622 |
| 537 | IPI00927400.1 | leucine-rich repeats and calponin homology (CH) domain containing        | 7.231191158 | 10.10188627 |
| 538 | IPI00642982.1 | LONP1 protein                                                            | 7.214317322 | 22.44947171 |
| 539 | IPI00220114.1 | Isoform 3 of Slit homolog 2 protein                                      | 7.173071146 | 7.331262827 |
| 540 | IPI00910979.1 | pyruvate kinase isozymes M1/M2 isoform e                                 | 7.110543251 | 16.17550302 |
| 541 | IPI00967721.1 | matrin 3                                                                 | 7.101774693 | 22.11561322 |
| 542 | IPI00219840.4 | Isoform 1 of AP-2 complex subunit sigma                                  | 7.097867489 | 2.949874163 |
| 543 | IPI00967490.1 | cDNA FLJ56719, highly similar to Probable dimethyladenosine transf       | 7.090898037 | 14.38364577 |
| 544 | IPI01015385.1 | Isocitrate dehydrogenase                                                 | 7.07719636  | 15.28122592 |
| 545 | IPI00909939.1 | cDNA FLJ52195, highly similar to LIM and SH3 domain protein 1            | 7.049134731 | 18.06489325 |
| 546 | IPI00145260.3 | Putative transferase CAF17, mitochondrial                                | 6.990388155 | 17.54720378 |
| 547 | IPI00029264.4 | Cytochrome c1, heme protein, mitochondrial                               | 6.984880447 | 6.802279472 |
| 548 | IPI00790752.1 | NADH dehydrogenase (ubiquinone) 1 beta subcomplex, 9, 22kDa              | 6.95763278  | 4.443318844 |
| 549 | IPI00008164.2 | Prolyl endopeptidase                                                     | 6.91545105  | 21.66241336 |
| 550 | IPI00641719.1 | Surfeit 4                                                                | 6.90372467  | 10.94220948 |
| 551 | IPI00178047.7 | proline, glutamate and leucine rich protein 1                            | 6.89819169  | 9.530154705 |
| 552 | IPI00395777.6 | CCR4-NOT transcription complex subunit 7 isoform 2                       | 6.879837036 | 3.427024841 |
| 553 | IPI00964815.1 | hexosaminidase B (beta polypeptide)                                      | 6.878056526 | 3.192093849 |
| 554 | IPI00419263.4 | enoyl-CoA delta isomerase 2, mitochondrial isoform 1                     | 6.834798098 | 12.46290755 |
| 555 | IPI00514078.1 | Isoform 5 of Pogo transposable element with ZNF domain                   | 6.818772078 | 22.88752937 |
| 556 | IPI00005154.1 | FACT complex subunit SSRP1                                               | 6.817866087 | 22.53734565 |
| 557 | IPI00979883.1 | phosphatidylserine synthase 1                                            | 6.789215803 | 7.925734043 |
| 558 | IPI00017704.3 | Coactosin-like protein                                                   | 6.788805962 | 3.505471468 |
| 559 | IPI00915421.1 | vitamin K-dependent gamma-carboxylase isoform 2                          | 6.780940533 | 11.76735616 |
| 560 | IPI00033770.5 | Isoform 1 of Probable alpha-ketoglutarate-dependent dioxygenase          | 6.766112328 | 18.29696798 |
| 561 | IPI00400922.5 | Protein RRP5 homolog                                                     | 6.764267206 | 92.87314916 |
| 562 | IPI00976971.1 | cDNA FLJ51637, highly similar to Metastasis-associated protein MTA       | 6.759697199 | 9.131706953 |
| 563 | IPI00854687.2 | Isoform 2 of Sister chromatid cohesion protein PDS5 homolog A            | 6.751713753 | 7.598765135 |

|     |                |                                                                        |             |             |
|-----|----------------|------------------------------------------------------------------------|-------------|-------------|
| 564 | IPI00644653.1  | cDNA FLJ56337, highly similar to High mobility group protein B1        | 6.738008976 | 33.20047784 |
| 565 | IPI00969375.1  | Hydroxyacyl-Coenzyme A dehydrogenase/3-ketoacyl-Coenzyme A thio        | 6.722335577 | 5.969776154 |
| 566 | IPI01010659.1  | ATP-binding cassette, sub-family C (CFTR/MRP), member 1                | 6.717027664 | 9.024774551 |
| 567 | IPI00219504.1  | Isoform 2 of Ubiquitin carboxyl-terminal hydrolase 15                  | 6.623579979 | 6.502687693 |
| 568 | IPI00061531.4  | 39S ribosomal protein L53, mitochondrial                               | 6.616873503 | 4.070573807 |
| 569 | IPI00879792.1  | Cytochrome b5 reductase 3                                              | 6.559267282 | 2.853048086 |
| 570 | IPI00871956.1  | Similar to Ribosomal protein S2                                        | 6.558877945 | 5.107149363 |
| 571 | IPI00061525.3  | Glucosamine 6-phosphate N-acetyltransferase                            | 6.554480791 | 15.9050281  |
| 572 | IPI00922694.1  | cDNA FLJ51903, highly similar to Stress-70 protein, mitochondrial      | 6.526292324 | 6.769001722 |
| 573 | IPI00872800.3  | cDNA FLJ13369 fis, clone PLACE1000610, weakly similar to MSN5 PROT     | 6.474249125 | 7.574740648 |
| 574 | IPI00645201.1  | Ribosomal protein S8                                                   | 6.465322495 | 10.60897493 |
| 575 | IPI00300299.6  | Signal peptidase complex subunit 3                                     | 6.444749594 | 9.801193237 |
| 576 | IPI00375145.1  | Isoform Short of Ubiquitin carboxyl-terminal hydrolase 5               | 6.440598011 | 22.03447986 |
| 577 | IPI00925437.1  | proteasome (prosome, macropain) 26S subunit, non-ATPase, 2             | 6.434225321 | 3.400685072 |
| 578 | IPI00328885.3  | immunoglobulin-like and fibronectin type III domain-containing pro     | 6.432921171 | 9.719846487 |
| 579 | IPI00746351.2  | Isoform 1 of Exosome complex exonuclease RRP44                         | 6.390559196 | 77.7708149  |
| 580 | IPI00003327.1  | ADP-ribosylation factor-like protein 3                                 | 6.376639128 | 15.37890005 |
| 581 | IPI00908881.2  | Glucose-6-phosphate isomerase                                          | 6.348568916 | 48.91212177 |
| 582 | IPI00908776.2  | actinin, alpha 4                                                       | 6.348047733 | 11.78577113 |
| 583 | IPI00964684.1  | heat shock 70kDa protein 4-like                                        | 6.31890583  | 14.87951994 |
| 584 | IPI00301364.3  | Isoform 1 of S-phase kinase-associated protein 1                       | 6.236357689 | 15.45435095 |
| 585 | IPI00006970.2  | Mitochondrial 28S ribosomal protein S2                                 | 6.224236012 | 5.738352776 |
| 586 | IPI00984288.1  | Conserved hypothetical protein                                         | 6.20807004  | 3.053001404 |
| 587 | IPI00018364.2  | Ras-related protein Rap-2b                                             | 6.203061819 | 15.88207364 |
| 588 | IPI00940901.1  | Isoform 2 of RRP12-like protein                                        | 6.19925189  | 26.62055063 |
| 589 | IPI00854677.1  | fused in sarcoma                                                       | 6.19677496  | 16.18292904 |
| 590 | IPI00152998.3  | Leucine-rich repeat-containing protein 40                              | 6.18484354  | 10.00075197 |
| 591 | IPI00917086.1  | cDNA FLJ53711, highly similar to TRF-proximal protein homolog          | 6.171779394 | 6.913748503 |
| 592 | IPI00022832.1  | Brain protein 44                                                       | 6.114253283 | 5.5035429   |
| 593 | IPI00293276.10 | Macrophage migration inhibitory factor                                 | 6.095655203 | 5.905552149 |
| 594 | IPI00032957.1  | SUMO-conjugating enzyme UBC9                                           | 6.089789629 | 11.05720043 |
| 595 | IPI00556640.1  | PSAP protein                                                           | 6.067298651 | 5.829153061 |
| 596 | IPI00985413.1  | e3 SUMO-protein ligase RanBP2-like                                     | 6.020735264 | 10.58321714 |
| 597 | IPI00464999.2  | HEAT repeat-containing protein 6                                       | 5.959110975 | 12.2603209  |
| 598 | IPI00000181.2  | mitochondrial ribosomal protein S24                                    | 5.954578161 | 8.018149137 |
| 599 | IPI00604431.1  | Isoform 2 of Cullin-associated NEDD8-dissociated protein 1             | 5.931916714 | 31.62165904 |
| 600 | IPI00869040.2  | Isoform 2 of Cytosolic Fe-S cluster assembly factor NUBP1              | 5.930080414 | 24.11399269 |
| 601 | IPI00419531.2  | Cleavage and polyadenylation specificity factor subunit 2              | 5.919741869 | 9.586447239 |
| 602 | IPI00430472.2  | Activating signal cointegrator 1 complex subunit 3                     | 5.897911072 | 15.47793245 |
| 603 | IPI00031615.3  | Protein LLP homolog                                                    | 5.780694723 | 3.592237473 |
| 604 | IPI00292894.5  | Pre-rRNA-processing protein TSR1 homolog                               | 5.77294302  | 36.7349472  |
| 605 | IPI00795212.1  | Isoform 2 of Probable Xaa-Pro aminopeptidase 3                         | 5.72518611  | 5.582162619 |
| 606 | IPI00152240.3  | Protein kish-A                                                         | 5.718772411 | 2.775909185 |
| 607 | IPI00877999.1  | ribosomal protein L3                                                   | 5.71636343  | 5.576543808 |
| 608 | IPI00640892.1  | Glyceronephosphate O-acyltransferase                                   | 5.714292765 | 5.636987925 |
| 609 | IPI00982721.1  | transcription elongation factor B (SIII), polypeptide 1 (15kDa, elongi | 5.694688559 | 3.263932943 |
| 610 | IPI00182289.6  | 40S ribosomal protein S29                                              | 5.664246559 | 2.92510581  |

|     |                |                                                                      |             |             |
|-----|----------------|----------------------------------------------------------------------|-------------|-------------|
| 611 | IPI00301609.8  | Serine/threonine-protein kinase Nek9                                 | 5.65256834  | 11.85293865 |
| 612 | IPI00394987.3  | Isoform 2 of F-box/LRR-repeat protein 12                             | 5.642956734 | 8.256112576 |
| 613 | IPI00974544.1  | Isoform SV of 14-3-3 protein epsilon                                 | 5.52858901  | 5.959573984 |
| 614 | IPI00943258.1  | Uncharacterized protein                                              | 5.526394844 | 7.282265425 |
| 615 | IPI00058192.1  | Isoform 1 of GDP-fucose protein O-fucosyltransferase 1               | 5.434002638 | 26.76087356 |
| 616 | IPI00743142.2  | Isoform 1 of 6-phosphofructokinase, muscle type                      | 5.428494692 | 22.03418517 |
| 617 | IPI00472887.3  | Isoform 2 of Cytoskeleton-associated protein 5                       | 5.417030573 | 27.95958161 |
| 618 | IPI00009597.1  | Isoform SMN-delta7 of Survival motor neuron protein                  | 5.387907982 | 35.93483925 |
| 619 | IPI00059809.3  | secretory carrier membrane protein 1                                 | 5.379752636 | 7.605496883 |
| 620 | IPI00910384.1  | family with sequence similarity 76, member A                         | 5.370937824 | 4.471651554 |
| 621 | IPI00917676.1  | leucine-rich pentatricopeptide repeat containing                     | 5.370515347 | 6.448785067 |
| 622 | IPI00307259.12 | DnaJ homolog subfamily C member 13                                   | 5.362244606 | 17.96756458 |
| 623 | IPI00419919.6  | Ribosomal protein L29                                                | 5.254568815 | 5.944256783 |
| 624 | IPI00023728.1  | Gamma-glutamyl hydrolase                                             | 5.247240782 | 13.57725263 |
| 625 | IPI00021812.2  | Neuroblast differentiation-associated protein AHNAK                  | 5.227503061 | 8.485305548 |
| 626 | IPI00795318.2  | cDNA FLJ54365, highly similar to DNA replication licensing factor MC | 5.194228888 | 30.22742081 |
| 627 | IPI00294495.5  | Ubiquitin-fold modifier-conjugating enzyme 1                         | 5.176022768 | 26.05916619 |
| 628 | IPI00797850.2  | Isoform 2 of Dual specificity mitogen-activated protein kinase kinas | 5.119152308 | 3.745077372 |
| 629 | IPI00300074.4  | Phenylalanyl-tRNA synthetase beta chain                              | 5.111426592 | 20.55725718 |
| 630 | IPI00412741.1  | Isoform 1 of Sideroflexin-4                                          | 5.057983398 | 7.226323843 |
| 631 | IPI00917430.1  | splicing factor 3b, subunit 1, 155kDa                                | 5.043381691 | 8.899055958 |
| 632 | IPI00744575.3  | Isoform Short of Probable ubiquitin carboxyl-terminal hydrolase FAF  | 4.988269329 | 9.697586775 |
| 633 | IPI00306383.2  | Isoform 2 of Secretory carrier-associated membrane protein 3         | 4.843749523 | 10.43175745 |
| 634 | IPI00747530.3  | Isoform 3 of Tax1-binding protein 1                                  | 4.822367668 | 9.279594421 |
| 635 | IPI00004839.1  | Crk-like protein                                                     | 4.729190826 | 7.640843868 |
| 636 | IPI01012475.1  | protein disulfide isomerase family A, member 3                       | 4.72342968  | 3.185017109 |
| 637 | IPI00020729.1  | Insulin receptor substrate 4                                         | 4.552227974 | 8.339183807 |
| 638 | IPI00644082.1  | Isoform 3 of tRNA guanosine-2'-O-methyltransferase TRM11 homolo      | 4.451956272 | 4.14463377  |
| 639 | IPI00977506.2  | prohibitin                                                           | 4.449507236 | 48.61954975 |
| 640 | IPI00304409.3  | Calcium-regulated heat stable protein 1                              | 4.354152679 | 7.878768682 |
| 641 | IPI00922290.1  | cDNA FLJ53094, highly similar to Receptor expression-enhancing pro   | 4.316569328 | 3.844114304 |
| 642 | IPI00439944.1  | ARCN1 protein                                                        | 4.308863163 | 6.997230768 |
| 643 | IPI00022640.1  | Neurogranin                                                          | 4.29251194  | 3.468683958 |
| 644 | IPI00013860.3  | 3-hydroxyisobutyrate dehydrogenase, mitochondrial                    | 4.278584957 | 3.140899181 |
| 645 | IPI00010463.5  | GTP-binding protein 1                                                | 4.245082378 | 9.582326889 |
| 646 | IPI00235412.7  | dynamamin 1-like                                                     | 4.143373489 | 18.62033153 |
| 647 | IPI00924593.1  | cDNA FLJ52880, highly similar to Malate dehydrogenase, mitochondr    | 4.139891624 | 4.061082363 |
| 648 | IPI00332511.5  | Serine/threonine-protein phosphatase 2A 55 kDa regulatory subuni     | 4.128800392 | 10.31970835 |
| 649 | IPI00894559.1  | NDUFA10 protein                                                      | 4.117241383 | 4.028757572 |
| 650 | IPI00947406.1  | chromosome 7 open reading frame 50                                   | 4.103247643 | 8.806075096 |
| 651 | IPI00026328.3  | Thioredoxin domain-containing protein 12                             | 4.094028473 | 6.261412382 |
| 652 | IPI00552646.1  | chromosome X open reading frame 38                                   | 4.068939209 | 2.786943197 |
| 653 | IPI00218050.2  | Isoform 2 of DNA mismatch repair protein Mlh3                        | 4.058671951 | 4.380568504 |
| 654 | IPI00917166.1  | dynactin 1                                                           | 3.930629492 | 8.637899637 |
| 655 | IPI00909432.1  | Isoform 4 of Glutathione S-transferase kappa 1                       | 3.926178217 | 3.271624804 |
| 656 | IPI00925058.1  | Ribosomal protein L15                                                | 3.923327684 | 3.402714968 |
| 657 | IPI00293078.1  | Probable ATP-dependent RNA helicase DDX27                            | 3.905130386 | 10.28052139 |

|     |               |                                                                     |              |             |
|-----|---------------|---------------------------------------------------------------------|--------------|-------------|
| 658 | IPI00032851.1 | Coatomer subunit zeta-1                                             | 3.897438288  | 15.62135386 |
| 659 | IPI00015891.1 | Prefoldin subunit 4                                                 | 3.881435871  | 3.21504283  |
| 660 | IPI00749054.2 | Isoform 3 of tRNA (uracil-5-)-methyltransferase homolog             | 3.856481314  | 8.432951927 |
| 661 | IPI00847768.1 | DEAD-box protein p72                                                | 3.846444368  | 3.573546648 |
| 662 | IPI00217405.1 | Isoform 1 of E3 ubiquitin-protein ligase UBR1                       | 3.834622383  | 8.006597757 |
| 663 | IPI00056357.3 | UPF0556 protein C19orf10                                            | 3.834048986  | 5.605211735 |
| 664 | IPI00106698.2 | Protein pelota homolog                                              | 3.829904079  | 3.965002298 |
| 665 | IPI00642454.1 | Ribosomal protein L7a                                               | 3.825775385  | 2.914595127 |
| 666 | IPI00026358.3 | Gamma-aminobutyric acid receptor-associated protein-like 2          | 3.812661886  | 6.262497902 |
| 667 | IPI00789134.5 | Glyceraldehyde-3-phosphate dehydrogenase                            | 3.793359756  | 20.75409532 |
| 668 | IPI01015636.1 | pogo transposable element with ZNF domain                           | 3.788869143  | 3.18219471  |
| 669 | IPI00005218.1 | Molybdopterin synthase catalytic subunit                            | 3.785743475  | 4.095580101 |
| 670 | IPI00788157.1 | Isoform 2 of 5'-3' exoribonuclease 2                                | 3.778432369  | 31.18069959 |
| 671 | IPI00930594.1 | acyl-coenzyme A thioesterase 13 isoform 2                           | 3.753232479  | 3.017426491 |
| 672 | IPI00103599.1 | BRI3-binding protein                                                | 3.745472908  | 7.51076436  |
| 673 | IPI01010993.1 | 19 kDa protein                                                      | 3.739369869  | 2.845736027 |
| 674 | IPI00916188.1 | Nucleolin                                                           | 3.739291668  | 19.88579917 |
| 675 | IPI00797533.2 | mitochondrial ribosomal protein L46                                 | 3.728572607  | 2.894883871 |
| 676 | IPI00965481.1 | ribosomal protein S3A                                               | 3.728090525  | 3.205724955 |
| 677 | IPI00219025.3 | Glutaredoxin-1                                                      | 3.71999979   | 3.495915413 |
| 678 | IPI00456702.3 | Isoform 2 of COMM domain-containing protein 4                       | 3.700555325  | 3.986202955 |
| 679 | IPI00647001.1 | Acidic (Leucine-rich) nuclear phosphoprotein 32 family, member B    | 3.680024862  | 4.003193855 |
| 680 | IPI00554617.2 | cDNA FLJ57277, highly similar to Tripeptidyl-peptidase 1            | 3.6673747193 | 7.41711092  |
| 681 | IPI00031982.1 | Isoform 1 of Nck-associated protein 1                               | 3.667258739  | 22.90902853 |
| 682 | IPI00893242.1 | aminoacyl tRNA synthetase complex-interacting multifunctional pro   | 3.666265249  | 5.994104862 |
| 683 | IPI00925990.1 | DEAD (Asp-Glu-Ala-Asp) box helicase 56                              | 3.663386106  | 3.793273449 |
| 684 | IPI00026167.5 | NHP2-like protein 1                                                 | 3.65789938   | 16.38205147 |
| 685 | IPI00299506.9 | Isoform 2 of Glucosamine--fructose-6-phosphate aminotransferase     | 3.639338017  | 19.81249595 |
| 686 | IPI00983028.1 | proline synthetase co-transcribed homolog (bacterial)               | 3.639157534  | 2.893331528 |
| 687 | IPI00003004.1 | Mitochondrial glutamate carrier 1                                   | 3.633758783  | 3.708626747 |
| 688 | IPI00794773.1 | cDNA FLJ51912, highly similar to Fumarylacetoacetase                | 3.633337021  | 3.022817612 |
| 689 | IPI00642816.2 | Isoform 1 of Signal recognition particle 9 kDa protein              | 3.61745286   | 3.627454281 |
| 690 | IPI00106642.4 | Dihydropyrimidinase-like 2                                          | 3.612304211  | 4.149096012 |
| 691 | IPI01018285.1 | FAD-dependent oxidoreductase domain containing 1                    | 3.607123137  | 2.839509249 |
| 692 | IPI00032911.3 | TATA box-binding protein-like protein 1                             | 3.604743958  | 7.538852692 |
| 693 | IPI00333763.7 | Glutaredoxin-related protein 5, mitochondrial                       | 3.548946619  | 4.103365421 |
| 694 | IPI00743342.2 | Four and a half LIM domains protein 2                               | 3.543523312  | 8.178222895 |
| 695 | IPI00009148.1 | Diphosphoinositol polyphosphate phosphohydrolase 1                  | 3.536843538  | 4.002020359 |
| 696 | IPI00032827.1 | Pre-mRNA branch site protein p14                                    | 3.524932384  | 8.709682941 |
| 697 | IPI00306642.3 | DDB1- and CUL4-associated factor 13                                 | 3.523300171  | 3.617166281 |
| 698 | IPI00980440.1 | aminopeptidase puromycin sensitive                                  | 3.513344288  | 3.441233397 |
| 699 | IPI00926546.2 | TIA1 cytotoxic granule-associated RNA binding protein               | 3.510085106  | 3.830174446 |
| 700 | IPI01015488.1 | estrogen-related receptor alpha                                     | 3.497158766  | 3.681059122 |
| 701 | IPI00015609.1 | DDB1- and CUL4-associated factor 16                                 | 3.492106438  | 3.067657709 |
| 702 | IPI00658162.2 | cDNA FLJ36570 fis, clone TRACH2011302, highly similar to SELENIDE,W | 3.480367899  | 4.516431808 |
| 703 | IPI00980890.2 | cDNA FLJ58780, highly similar to Homo sapiens lysosomal-associate   | 3.47510457   | 6.85842371  |
| 704 | IPI00642486.1 | ubiquitin related modifier 1                                        | 3.474912643  | 3.344897985 |

|     |               |                                                                      |             |             |
|-----|---------------|----------------------------------------------------------------------|-------------|-------------|
| 705 | IPI00917594.1 | proteasome (prosome, macropain) 26S subunit, non-ATPase, 1           | 3.442355156 | 8.706087828 |
| 706 | IPI00170596.1 | Paired amphipathic helix protein Sin3a                               | 3.438802481 | 5.449266911 |
| 707 | IPI00927538.1 | transducin (beta)-like 2                                             | 3.418755531 | 7.273132324 |
| 708 | IPI00902463.1 | cDNA FLJ46898 fis, clone UTERU3022168, highly similar to Protein FAM | 3.396526098 | 21.77505827 |
| 709 | IPI00783250.1 | TRIP12 protein                                                       | 3.389698505 | 9.825669765 |
| 710 | IPI00412713.4 | Sorting and assembly machinery component 50 homolog                  | 3.37523222  | 7.850270987 |
| 711 | IPI00909956.1 | cDNA FLJ59103, highly similar to T-complex protein 1 subunit epsilon | 3.369731665 | 4.03897047  |
| 712 | IPI00797802.1 | mitochondrial 2-oxoglutarate/malate carrier protein isoform 3        | 3.350028038 | 6.823238134 |
| 713 | IPI00643263.1 | Vps20-associated 1 homolog                                           | 3.347207785 | 11.76907969 |
| 714 | IPI00384155.1 | Full-length cDNA clone CS0DI002YH20 of Placenta of Homo sapiens      | 3.333331585 | 4.626288414 |
| 715 | IPI00031526.3 | chromosome 19 open reading frame 43                                  | 3.332810879 | 9.43253684  |
| 716 | IPI00748354.1 | Isoform 1 of Mitochondrial intermembrane space import and assem      | 3.330058098 | 12.85658073 |
| 717 | IPI00642244.2 | ER membrane protein complex subunit 1                                | 3.329001665 | 6.481980085 |
| 718 | IPI00816513.2 | mutS homolog 2, colon cancer, nonpolyposis type 1 (E. coli)          | 3.318204403 | 3.714787483 |
| 719 | IPI00646750.2 | cytochrome c oxidase assembly factor 6 homolog (S. cerevisiae)       | 3.313561916 | 3.490073919 |
| 720 | IPI00220373.5 | Insulin-degrading enzyme                                             | 3.309896469 | 14.45638919 |
| 721 | IPI00978986.1 | nucleoporin 160kDa                                                   | 3.309469938 | 31.80257511 |
| 722 | IPI01009290.1 | cDNA FLJ52916, highly similar to ribosomal RNA methyltransferase 1   | 3.304074526 | 2.816954136 |
| 723 | IPI00396056.6 | Isoform p18 of 7,8-dihydro-8-oxoguanine triphosphatase               | 3.296686649 | 3.553375483 |
| 724 | IPI00646767.1 | nuclear distribution Chomolog (A. nidulans)                          | 3.292669296 | 7.126162052 |
| 725 | IPI01015765.1 | cDNA FLJ57240, highly similar to Mitochondrial proteins import rece  | 3.291688919 | 14.81278539 |
| 726 | IPI00927379.1 | LUC7-like                                                            | 3.282767773 | 3.292594433 |
| 727 | IPI00013396.3 | U1 small nuclear ribonucleoprotein C                                 | 3.261357307 | 7.142628908 |
| 728 | IPI00169325.1 | WD repeat-containing protein 36                                      | 3.25672245  | 25.42709994 |
| 729 | IPI00384571.3 | MRPL43 protein (Fragment)                                            | 3.250708818 | 3.587357759 |
| 730 | IPI00978302.1 | cofilin 1 (non-muscle)                                               | 3.245178699 | 9.820427179 |
| 731 | IPI00218895.6 | DNA-directed RNA polymerase II subunit RPB7                          | 3.242640018 | 8.362938881 |
| 732 | IPI00791782.2 | Isoform 3 of Transmembrane protein 85                                | 3.238839149 | 3.189184427 |
| 733 | IPI00877664.1 | HNRPC protein                                                        | 3.229525328 | 6.038960695 |
| 734 | IPI00218838.1 | Isoform 2 of Glomulin                                                | 3.226986408 | 3.44948864  |
| 735 | IPI00019380.1 | Nuclear cap-binding protein subunit 1                                | 3.226590872 | 38.25334501 |
| 736 | IPI00294211.2 | Pre-mRNA-splicing factor ATP-dependent RNA helicase PRP16            | 3.224330187 | 3.504382849 |
| 737 | IPI00946754.1 | Protease serine 1                                                    | 3.217814922 | 9.725289345 |
| 738 | IPI00640188.1 | PRA1 domain family, member 2                                         | 3.215258598 | 3.194475889 |
| 739 | IPI00006574.1 | family with sequence similarity 49, member A                         | 3.203294277 | 6.060539007 |
| 740 | IPI00787239.1 | Isoform 2 of Transmembrane protein 70, mitochondrial                 | 3.190694809 | 3.062651634 |
| 741 | IPI00927631.1 | nuclear cap binding protein subunit 2, 20kDa                         | 3.180920124 | 3.165471554 |
| 742 | IPI00796478.1 | Synaptogyrin 1                                                       | 3.178820372 | 3.604151011 |
| 743 | IPI00974419.1 | mini-chromosome maintenance complex component 4                      | 3.172092199 | 10.73406553 |
| 744 | IPI00965753.1 | neurolysin (metallopeptidase M3 family)                              | 3.166867971 | 7.52709794  |
| 745 | IPI01013815.1 | cDNA FLJ54736, highly similar to Scaffold attachment factor B        | 3.160569906 | 6.301415205 |
| 746 | IPI00908568.1 | replication factor C subunit 5 isoform 3                             | 3.156708956 | 10.77553797 |
| 747 | IPI00552972.3 | ribophorin II                                                        | 3.154435635 | 3.805977583 |
| 748 | IPI00105068.2 | mannose-P-dolichol utilization defect 1                              | 3.145113468 | 7.013731241 |
| 749 | IPI00894025.1 | ribosomal protein L10                                                | 3.142888308 | 3.099099159 |
| 750 | IPI00966408.1 | hydroxysteroid (17-beta) dehydrogenase 11                            | 3.126099825 | 5.856959581 |
| 751 | IPI00647467.1 | Isoform 2 of Protein-tyrosine phosphatase mitochondrial 1            | 3.116794348 | 6.496219635 |

|     |                |                                                                      |             |             |
|-----|----------------|----------------------------------------------------------------------|-------------|-------------|
| 752 | IPI00399195.1  | Isoform 2 of Cirhin                                                  | 3.110436678 | 3.85973525  |
| 753 | IPI00983399.1  | RAB15, member RAS oncogene family                                    | 3.108854532 | 3.227412224 |
| 754 | IPI00030847.3  | Transmembrane 9 superfamily member 3                                 | 3.108247519 | 6.353409529 |
| 755 | IPI00908532.1  | cDNA FLJ57633, highly similar to Lysosome-associated membrane gly    | 3.107279062 | 4.186969757 |
| 756 | IPI00377084.1  | ribonuclease P/MRP protein subunit POP5 isoform c                    | 3.103389263 | 2.764899731 |
| 757 | IPI00063130.2  | Transmembrane protein 205                                            | 3.094141006 | 3.628275633 |
| 758 | IPI00027704.5  | DNA primase small subunit                                            | 3.088574886 | 10.48273039 |
| 759 | IPI00940786.2  | cDNA FLJ50873, highly similar to DNA replication licensing factor MC | 3.08483696  | 5.70458436  |
| 760 | IPI00872761.2  | fragile X mental retardation 1 protein isoform ISO12                 | 3.077638626 | 3.697481632 |
| 761 | IPI00916398.1  | IMP4, U3 small nucleolar ribonucleoprotein, homolog (yeast)          | 3.07574439  | 10.13596678 |
| 762 | IPI00152377.1  | Dolichyl-diphosphooligosaccharide--protein glycosyltransferase su    | 3.0711689   | 8.360854387 |
| 763 | IPI00410157.4  | Isoform 4 of CCR4-NOT transcription complex subunit 1                | 3.069497108 | 3.153642654 |
| 764 | IPI00513841.1  | Nicastrin                                                            | 3.068019867 | 10.66344333 |
| 765 | IPI00396331.4  | Zinc finger protein 224                                              | 3.063132048 | 3.123922348 |
| 766 | IPI00796102.1  | actin related protein 2/3 complex, subunit 3, 21kDa                  | 3.056749344 | 3.016141176 |
| 767 | IPI01011483.1  | Fanconi anemia, complementation group I                              | 3.054372311 | 7.051631212 |
| 768 | IPI00655681.1  | succinate dehydrogenase cytochrome b560 subunit, mitochondrial i     | 3.052879572 | 3.373564482 |
| 769 | IPI00006442.1  | Coilin                                                               | 3.052608252 | 8.148685455 |
| 770 | IPI00007052.6  | Mitochondrial fission 1 protein                                      | 3.050519466 | 3.074013233 |
| 771 | IPI00166013.1  | AAR2 splicing factor homolog (S. cerevisiae)                         | 3.047001362 | 6.960672855 |
| 772 | IPI00884370.1  | DFNA5 protein family protein                                         | 3.045160055 | 2.985293627 |
| 773 | IPI00879437.1  | prolyl 4-hydroxylase, beta polypeptide                               | 3.028154373 | 2.977276087 |
| 774 | IPI00328089.16 | Isoform 2 of Transcription factor HIVEP3                             | 3.015028477 | 3.170693398 |
| 775 | IPI00329332.1  | Syntaxin-12                                                          | 3.009957552 | 28.30562234 |
| 776 | IPI00639819.1  | TAR DNA binding protein                                              | 3.003374338 | 25.38175821 |
| 777 | IPI00983093.1  | poly(A) binding protein, cytoplasmic 1                               | 2.986663818 | 2.845418215 |
| 778 | IPI00982362.1  | Uncharacterized protein                                              | 2.985399246 | 5.20803833  |
| 779 | IPI00418523.1  | Similar to Nucleolar complex protein 2 homolog                       | 2.976199865 | 3.104102135 |
| 780 | IPI00008753.1  | Metallothionein-1X                                                   | 2.968417406 | 2.829637289 |
| 781 | IPI00001146.1  | U6 snRNA-associated Sm-like protein LSm6                             | 2.96451807  | 5.99358058  |
| 782 | IPI00892695.1  | brain and reproductive organ-expressed (TNFRSF1A modulator)          | 2.953055382 | 3.993766069 |
| 783 | IPI00977024.1  | ring finger protein 170                                              | 2.939703226 | 5.906941414 |
| 784 | IPI00401264.5  | Endoplasmic reticulum resident protein 44                            | 2.93690753  | 6.655044317 |
| 785 | IPI00024775.1  | Ras-related protein Rab-7L1                                          | 2.936436415 | 5.391480207 |
| 786 | IPI00304935.6  | Protein SAAL1                                                        | 2.925481319 | 2.954362869 |
| 787 | IPI00797749.1  | cDNA FLJ34514 fis, clone HLUNG2006599, highly similar to Syntaxin-4  | 2.903419971 | 3.420435667 |
| 788 | IPI00916988.1  | Isoform 2 of RNA pseudouridylate synthase domain-containing prot     | 2.897808552 | 8.946968317 |
| 789 | IPI00221232.9  | Guanine nucleotide-binding protein G(I)/G(S)/G(O) subunit gamma-     | 2.892389297 | 2.927713156 |
| 790 | IPI00556364.1  | Interleukin enhancer binding factor 3 isoform c variant (Fragment)   | 2.874989986 | 7.323945999 |
| 791 | IPI00916648.1  | WD repeat and FYVE domain containing 1                               | 2.858377695 | 7.127812862 |
| 792 | IPI00477181.2  | ring finger protein 220                                              | 2.857547522 | 3.856014013 |
| 793 | IPI00026119.6  | Ubiquitin-activating enzyme E1                                       | 2.853475094 | 4.151154995 |
| 794 | IPI00978325.1  | cathepsin C                                                          | 2.779670954 | 3.754447222 |
| 795 | IPI00945551.1  | cms1 ribosomal small subunit homolog (yeast)                         | 2.775691748 | 7.515066147 |
| 796 | IPI00643908.3  | cDNA FLJ53700, highly similar to Hepatoma-derived growth factor      | 2.774966478 | 6.971341133 |
| 797 | IPI00477012.1  | Isoform 2 of Double-stranded RNA-specific editase 1                  | 2.773857355 | 6.595125914 |
| 798 | IPI00019488.1  | U3 small nucleolar ribonucleoprotein protein IMP3                    | 2.759111643 | 3.54423666  |
| 799 | IPI00514669.1  | SH3 domain binding glutamic acid-rich protein like 3                 | 2.708771467 | 2.784610033 |



**Table S5.** BPPM-revealed nonhistone targets of EuHMT1 and 2 in HEK293T cells using tandem mass tagging (TMT).

| Serial | Accession     | Description                                                | EuHMT1 /Control | EuHMT2/control | EuHMT2/EuHMT1 |
|--------|---------------|------------------------------------------------------------|-----------------|----------------|---------------|
| 1      | IPI00942420.2 | Isoform 1 of Histone-lysine N-methyltransferase EHMT1      | 11.339          | 2.382          | 0.177         |
| 2      | IPI00186290.6 | Elongation factor 2                                        | 2.165           | 2.251          | 1.068         |
| 3      | IPI00220795.4 | Isoform 2 of Histone-lysine N-methyltransferase EHMT2      | 3.336           | 8.583          | 2.815         |
| 4      | IPI00792677.1 | cDNA FLJ60097, highly similar to Tubulin alpha-ubiquitous  | 3.235           | 2.486          | 0.974         |
| 5      | IPI00218343.4 | Tubulin alpha-1C chain                                     | 2.023           | 1.946          | 0.988         |
| 6      | IPI00909140.9 | cDNA FLJ56903, highly similar to Tubulin beta-7 chain      | 1.940           | 1.987          | 1.135         |
| 7      | IPI00007752.1 | Tubulin beta-2C chain                                      | 1.973           | 1.748          | 0.805         |
| 8      | IPI00984352.1 | protein arginine methyltransferase 1                       | 2.422           | 2.021          | 0.829         |
| 9      | IPI00031370.3 | Tubulin beta-2B chain                                      | 1.870           | 1.780          | 0.964         |
| 10     | IPI00396485.3 | Elongation factor 1-alpha 1                                | 2.624           | 2.212          | 0.906         |
| 11     | IPI00021439.1 | Actin, cytoplasmic 1                                       | 2.832           | 2.426          | 0.761         |
| 12     | IPI00219018.7 | Glyceraldehyde-3-phosphate dehydrogenase                   | 2.653           | 2.468          | 0.964         |
| 13     | IPI00414676.6 | Heat shock protein HSP 90-beta                             | 2.646           | 1.937          | 0.874         |
| 14     | IPI00022977.1 | Creatine kinase B-type                                     | 2.975           | 2.219          | 0.698         |
| 15     | IPI00784295.2 | Isoform 1 of Heat shock protein HSP 90-alpha               | 3.106           | 2.186          | 0.803         |
| 16     | IPI00455383.4 | Isoform 2 of Clathrin heavy chain 1                        | 3.055           | 2.569          | 0.858         |
| 17     | IPI00922693.1 | cDNA FLJ53662, highly similar to Actin, alpha skeletal mus | 3.362           | 2.119          | 0.630         |
| 18     | IPI00304925.5 | Heat shock 70 kDa protein 1A/1B                            | 2.487           | 1.846          | 0.756         |
| 19     | IPI00465248.5 | Isoform alpha-enolase of Alpha-enolase                     | 1.863           | 1.812          | 0.945         |
| 20     | IPI00925572.1 | asparagine synthetase [glutamine-hydrolyzing] isoform b    | 2.863           | 2.544          | 0.843         |
| 21     | IPI00014424.1 | Elongation factor 1-alpha 2                                | 2.509           | 2.783          | 1.109         |
| 22     | IPI00911039.1 | cDNA FLJ54408, highly similar to Heat shock 70 kDa protein | 2.594           | 1.448          | 0.558         |
| 23     | IPI00807545.1 | Isoform 3 of Heterogeneous nuclear ribonucleoprotein K     | 2.952           | 2.073          | 0.699         |
| 24     | IPI00465439.5 | Fructose-bisphosphate aldolase A                           | 2.469           | 2.025          | 0.825         |
| 25     | IPI00784154.1 | 60 kDa heat shock protein, mitochondrial                   | 2.529           | 1.899          | 0.719         |
| 26     | IPI00000874.1 | Peroxioredoxin-1                                           | 2.765           | 2.032          | 0.763         |
| 27     | IPI00658109.1 | Isoform 1 of Creatine kinase U-type, mitochondrial         | 3.039           | 2.232          | 0.709         |
| 28     | IPI00644224.2 | cDNA FLJ54020, highly similar to Heterogeneous nuclear ri  | 2.624           | 1.702          | 0.683         |
| 29     | IPI00219217.3 | L-lactate dehydrogenase B chain                            | 2.764           | 2.605          | 1.007         |
| 30     | IPI00644079.4 | cDNA FLJ44920 fis, clone BRAMY3011501, highly similar to H | 2.731           | 1.798          | 0.658         |
| 31     | IPI00026781.3 | Fatty acid synthase                                        | 2.964           | 2.663          | 0.869         |
| 32     | IPI00011200.5 | D-3-phosphoglycerate dehydrogenase                         | 2.619           | 1.963          | 0.741         |
| 33     | IPI00219446.5 | Phosphatidylethanolamine-binding protein 1                 | 2.175           | 1.704          | 0.759         |
| 34     | IPI00012011.6 | Cofilin-1                                                  | 3.308           | 2.653          | 0.824         |
| 35     | IPI00784090.2 | T-complex protein 1 subunit theta                          | 2.631           | 2.103          | 0.802         |
| 36     | IPI00003865.1 | Isoform 1 of Heat shock cognate 71 kDa protein             | 2.102           | 1.703          | 0.773         |
| 37     | IPI00011253.3 | 40S ribosomal protein S3                                   | 3.011           | 2.497          | 0.818         |
| 38     | IPI01011191.1 | cDNA FLJ59681, highly similar to Plastin-3                 | 3.086           | 1.659          | 0.470         |
| 39     | IPI00220327.4 | Keratin, type II cytoskeletal 1                            | 2.287           | 1.729          | 0.774         |
| 40     | IPI00021290.5 | ATP-citrate synthase                                       | 2.196           | 2.134          | 0.894         |
| 41     | IPI00479186.7 | Isoform M2 of Pyruvate kinase isozymes M1/M2               | 2.648           | 2.020          | 0.754         |
| 42     | IPI00220740.1 | Isoform 2 of Nucleophosmin                                 | 2.539           | 1.996          | 0.753         |
| 43     | IPI00216691.5 | Profilin-1                                                 | 4.000           | 2.225          | 0.589         |
| 44     | IPI00419585.9 | Peptidyl-prolyl cis-trans isomerase A                      | 2.683           | 1.953          | 0.661         |

|    |                |                                                                |       |       |       |
|----|----------------|----------------------------------------------------------------|-------|-------|-------|
| 45 | IPI00418471.6  | Vimentin                                                       | 1.785 | 1.825 | 1.011 |
| 46 | IPI00797270.4  | Isoform 1 of Triosephosphate isomerase                         | 2.634 | 1.881 | 0.729 |
| 47 | IPI00291006.2  | Malate dehydrogenase, mitochondrial                            | 2.107 | 2.238 | 1.075 |
| 48 | IPI01015565.1  | ubiquitin C                                                    | 3.479 | 2.517 | 0.582 |
| 49 | IPI00643041.3  | GTP-binding nuclear protein Ran                                | 2.540 | 1.998 | 0.793 |
| 50 | IPI00645078.1  | Ubiquitin-like modifier-activating enzyme 1                    | 2.139 | 2.097 | 0.918 |
| 51 | IPI00909207.1  | cDNA FLJ60461, highly similar to Peroxiredoxin-2               | 2.018 | 1.734 | 0.840 |
| 52 | IPI01011912.1  | Phosphoglycerate kinase                                        | 2.799 | 2.184 | 0.814 |
| 53 | IPI00299524.2  | Condensin complex subunit 1                                    | 3.358 | 2.968 | 0.859 |
| 54 | IPI00795292.1  | Isoform 3 of Nucleoside diphosphate kinase B                   | 3.114 | 2.009 | 0.644 |
| 55 | IPI00217966.9  | Isoform 1 of L-lactate dehydrogenase A chain                   | 2.646 | 2.818 | 1.050 |
| 56 | IPI00855957.3  | Isoform 2 of Far upstream element-binding protein 2            | 2.656 | 2.098 | 0.821 |
| 57 | IPI00003362.3  | 78 kDa glucose-regulated protein                               | 2.163 | 1.669 | 0.794 |
| 58 | IPI00010796.1  | Protein disulfide-isomerase                                    | 2.409 | 1.888 | 0.778 |
| 59 | IPI00554786.5  | Isoform 5 of Thioredoxin reductase 1, cytoplasmic              | 2.733 | 2.238 | 0.792 |
| 60 | IPI00937615.2  | Elongation factor 1-gamma                                      | 2.291 | 2.167 | 0.991 |
| 61 | IPI00414696.1  | Isoform A2 of Heterogeneous nuclear ribonucleoproteins         | 2.808 | 2.370 | 0.877 |
| 62 | IPI00297779.7  | T-complex protein 1 subunit beta                               | 1.750 | 1.661 | 0.948 |
| 63 | IPI00012048.1  | Isoform 1 of Nucleoside diphosphate kinase A                   | 2.553 | 1.936 | 0.802 |
| 64 | IPI00793443.2  | Isoform 1 of Importin-5                                        | 2.190 | 2.055 | 0.830 |
| 65 | IPI00966238.2  | cDNA FLJ51907, highly similar to Stress-70 protein, mitochondr | 2.193 | 1.918 | 0.863 |
| 66 | IPI00019755.3  | Glutathione S-transferase omega-1                              | 2.420 | 2.095 | 0.818 |
| 67 | IPI00013881.6  | Heterogeneous nuclear ribonucleoprotein H                      | 1.974 | 2.192 | 1.090 |
| 68 | IPI00013452.11 | Bifunctional aminoacyl-tRNA synthetase                         | 2.831 | 2.270 | 0.795 |
| 69 | IPI00604620.3  | Nucleolin                                                      | 2.230 | 1.946 | 0.881 |
| 70 | IPI00024145.2  | Isoform 2 of Voltage-dependent anion-selective channel         | 2.874 | 2.206 | 0.733 |
| 71 | IPI00216298.6  | Thioredoxin                                                    | 3.674 | 2.068 | 0.536 |
| 72 | IPI00001639.2  | Importin subunit beta-1                                        | 2.224 | 1.761 | 0.821 |
| 73 | IPI00008530.1  | 60S acidic ribosomal protein P0                                | 2.829 | 2.782 | 0.962 |
| 74 | IPI00016610.2  | Poly(rC)-binding protein 1                                     | 3.121 | 2.617 | 0.862 |
| 75 | IPI00554723.5  | 60S ribosomal protein L10                                      | 2.698 | 1.944 | 0.785 |
| 76 | IPI00815732.1  | Isoform 2 of Multifunctional protein ADE2                      | 2.572 | 1.956 | 0.769 |
| 77 | IPI00021304.1  | Keratin, type II cytoskeletal 2 epidermal                      | 2.336 | 3.532 | 1.906 |
| 78 | IPI00411704.9  | Isoform 1 of Eukaryotic translation initiation factor 5A-1     | 2.761 | 1.999 | 0.668 |
| 79 | IPI00021263.3  | 14-3-3 protein zeta/delta                                      | 2.606 | 2.007 | 0.801 |
| 80 | IPI00000816.1  | Isoform 1 of 14-3-3 protein epsilon                            | 2.601 | 1.814 | 0.760 |
| 81 | IPI00449049.5  | Poly [ADP-ribose] polymerase 1                                 | 2.248 | 1.965 | 0.893 |
| 82 | IPI00303568.3  | Prostaglandin E synthase 2                                     | 2.252 | 2.005 | 0.855 |
| 83 | IPI00025273.1  | Isoform Long of Trifunctional purine biosynthetic protein      | 2.376 | 2.243 | 0.935 |
| 84 | IPI00027230.3  | Endoplasmic                                                    | 1.765 | 1.717 | 0.973 |
| 85 | IPI00844578.1  | ATP-dependent RNA helicase A                                   | 2.631 | 2.390 | 0.936 |
| 86 | IPI01012004.1  | cDNA PSEC0175 fis, clone OVARC1000169, highly similar to P     | 2.518 | 2.258 | 0.807 |
| 87 | IPI00003881.5  | Heterogeneous nuclear ribonucleoprotein F                      | 2.285 | 2.199 | 0.900 |
| 88 | IPI00413324.6  | 60S ribosomal protein L17                                      | 2.389 | 1.800 | 0.737 |
| 89 | IPI00759596.1  | Isoform 4 of Heterogeneous nuclear ribonucleoproteins C        | 2.809 | 2.386 | 0.685 |
| 90 | IPI01014604.1  | T-complex protein 1 subunit delta                              | 2.465 | 1.999 | 0.819 |
| 91 | IPI00027107.5  | elongation factor Tu, mitochondrial precursor                  | 2.899 | 1.277 | 0.435 |

|     |                |                                                             |       |       |       |
|-----|----------------|-------------------------------------------------------------|-------|-------|-------|
| 92  | IPI00011937.1  | Peroxisredoxin-4                                            | 2.623 | 2.223 | 0.792 |
| 93  | IPI00009865.4  | Keratin, type I cytoskeletal 10                             | 1.774 | 1.649 | 0.878 |
| 94  | IPI00003918.6  | 60S ribosomal protein L4                                    | 2.463 | 2.400 | 0.971 |
| 95  | IPI00010720.1  | T-complex protein 1 subunit epsilon                         | 2.437 | 2.078 | 0.835 |
| 96  | IPI00900327.2  | cDNA FLJ58339, highly similar to Poly(rC)-binding protein 2 | 2.898 | 2.771 | 0.909 |
| 97  | IPI00027442.4  | Alanyl-tRNA synthetase, cytoplasmic                         | 1.977 | 1.806 | 0.924 |
| 98  | IPI00848161.1  | Isoform 1 of Spliceosome RNA helicase DDX39B                | 2.135 | 2.056 | 0.926 |
| 99  | IPI00002966.2  | Heat shock 70 kDa protein 4                                 | 2.014 | 2.007 | 0.935 |
| 100 | IPI00646304.4  | Peptidyl-prolyl cis-trans isomerase B                       | 2.587 | 2.063 | 0.810 |
| 101 | IPI00018146.1  | 14-3-3 protein theta                                        | 3.096 | 2.403 | 0.743 |
| 102 | IPI00551024.5  | Bifunctional ATP-dependent dihydroxyacetone kinase/FAD      | 2.701 | 1.988 | 0.714 |
| 103 | IPI00438230.3  | Isoform 2 of Transcription intermediary factor 1-beta       | 2.593 | 2.159 | 0.832 |
| 104 | IPI00216492.1  | Isoform 2 of Heterogeneous nuclear ribonucleoprotein H3     | 2.698 | 2.502 | 0.938 |
| 105 | IPI00922367.1  | non-POU domain-containing octamer-binding protein isoform   | 2.443 | 2.058 | 0.789 |
| 106 | IPI00018206.4  | Aspartate aminotransferase, mitochondrial                   | 2.269 | 1.801 | 0.826 |
| 107 | IPI00022774.3  | Transitional endoplasmic reticulum ATPase                   | 1.894 | 1.957 | 0.947 |
| 108 | IPI00952607.1  | T-complex protein 1 subunit eta isoform d                   | 2.592 | 2.064 | 0.803 |
| 109 | IPI00024933.3  | Isoform 1 of 60S ribosomal protein L12                      | 3.286 | 2.632 | 0.784 |
| 110 | IPI00005198.2  | Interleukin enhancer-binding factor 2                       | 2.264 | 1.786 | 0.848 |
| 111 | IPI00465365.4  | Isoform A1-A of Heterogeneous nuclear ribonucleoprotein     | 2.983 | 2.679 | 1.093 |
| 112 | IPI00218606.7  | 40S ribosomal protein S23                                   | 3.860 | 2.426 | 0.633 |
| 113 | IPI00179964.5  | Isoform 1 of Polypyrimidine tract-binding protein 1         | 2.330 | 2.018 | 0.866 |
| 114 | IPI00220684.1  | Isoform 3 of Heterogeneous nuclear ribonucleoprotein D0     | 2.759 | 2.111 | 0.709 |
| 115 | IPI00789370.3  | serine hydroxymethyltransferase, mitochondrial isoform 3    | 1.993 | 2.084 | 1.076 |
| 116 | IPI00009904.1  | Protein disulfide-isomerase A4                              | 2.055 | 1.763 | 0.871 |
| 117 | IPI00003935.6  | Histone H2B type 2-E                                        | 2.516 | 1.883 | 0.799 |
| 118 | IPI00290566.1  | T-complex protein 1 subunit alpha                           | 2.716 | 2.105 | 0.737 |
| 119 | IPI00909530.1  | Histone H3                                                  | 3.197 | 2.420 | 0.726 |
| 120 | IPI00220642.7  | 14-3-3 protein gamma                                        | 2.460 | 2.071 | 0.771 |
| 121 | IPI00413344.3  | Cofilin-2                                                   | 2.917 | 1.744 | 0.598 |
| 122 | IPI00218342.10 | C-1-tetrahydrofolate synthase, cytoplasmic                  | 2.043 | 1.994 | 0.892 |
| 123 | IPI00552590.1  | T-complex protein 1 subunit zeta isoform b                  | 2.699 | 1.851 | 0.731 |
| 124 | IPI00374151.1  | thioredoxin-dependent peroxide reductase, mitochondria      | 2.175 | 1.811 | 0.894 |
| 125 | IPI00012007.6  | Adenosylhomocysteinase                                      | 2.106 | 1.733 | 0.779 |
| 126 | IPI00004534.5  | Phosphoribosylformylglycinamide synthase                    | 3.384 | 2.866 | 0.958 |
| 127 | IPI00941747.1  | Calnexin                                                    | 2.364 | 2.007 | 0.816 |
| 128 | IPI00031804.1  | Isoform 1 of Voltage-dependent anion-selective channel      | 2.744 | 1.955 | 0.764 |
| 129 | IPI00219160.3  | 60S ribosomal protein L34                                   | 4.626 | 2.366 | 0.741 |
| 130 | IPI00218547.1  | Isoform Short of Delta-1-pyrroline-5-carboxylate synthase   | 2.585 | 2.431 | 0.903 |
| 131 | IPI00025091.3  | 40S ribosomal protein S11                                   | 3.019 | 2.648 | 0.816 |
| 132 | IPI00383296.5  | Isoform 2 of Heterogeneous nuclear ribonucleoprotein M      | 1.904 | 1.946 | 1.121 |
| 133 | IPI00013917.3  | 40S ribosomal protein S12                                   | 3.238 | 2.003 | 0.602 |
| 134 | IPI00008433.4  | 40S ribosomal protein S5                                    | 2.118 | 1.858 | 0.909 |
| 135 | IPI00470498.1  | Isoform 3 of Plasminogen activator inhibitor 1 RNA-binding  | 2.108 | 1.729 | 0.731 |
| 136 | IPI00549389.3  | Conserved hypothetical protein                              | 2.651 | 2.138 | 0.806 |
| 137 | IPI00017334.1  | Prohibitin                                                  | 2.330 | 1.929 | 0.765 |
| 138 | IPI00001734.3  | Phosphoserine aminotransferase                              | 3.067 | 2.378 | 0.777 |

|     |               |                                                            |       |       |       |
|-----|---------------|------------------------------------------------------------|-------|-------|-------|
| 139 | IPI00298547.3 | Protein DJ-1                                               | 1.960 | 1.566 | 0.778 |
| 140 | IPI00746438.2 | Isoform 2 of 60S ribosomal protein L11                     | 2.442 | 1.992 | 0.816 |
| 141 | IPI00299000.5 | Proliferation-associated protein 2G4                       | 1.805 | 1.927 | 1.096 |
| 142 | IPI00218993.1 | Isoform Beta of Heat shock protein 105 kDa                 | 2.411 | 2.322 | 0.836 |
| 143 | IPI00908543.1 | cDNA FLJ56133, highly similar to Serine/threonine-protein  | 2.493 | 1.876 | 0.727 |
| 144 | IPI00783097.4 | Glycyl-tRNA synthetase                                     | 2.289 | 2.009 | 0.894 |
| 145 | IPI00220766.5 | Lactoylglutathione lyase                                   | 2.323 | 2.021 | 0.826 |
| 146 | IPI01013559.1 | cDNA FLJ58502, highly similar to Protein disulfide-isomera | 1.772 | 1.750 | 0.977 |
| 147 | IPI00013485.3 | 40S ribosomal protein S2                                   | 2.800 | 2.408 | 0.831 |
| 148 | IPI00216319.3 | 14-3-3 protein eta                                         | 2.527 | 2.068 | 0.818 |
| 149 | IPI00783271.1 | Leucine-rich PPR motif-containing protein, mitochondrial   | 2.427 | 2.464 | 1.086 |
| 150 | IPI00219330.2 | Isoform 5 of Interleukin enhancer-binding factor 3         | 2.334 | 2.255 | 0.934 |
| 151 | IPI00219616.7 | Ribose-phosphate pyrophosphokinase 1                       | 2.620 | 2.537 | 0.958 |
| 152 | IPI00385834.3 | Isoform 2 of KH domain-containing, RNA-binding, signal tr  | 3.117 | 2.534 | 0.847 |
| 153 | IPI00917777.1 | 116 kDa U5 small nuclear ribonucleoprotein component is    | 1.919 | 1.816 | 0.959 |
| 154 | IPI00744692.1 | Transaldolase                                              | 2.543 | 2.313 | 0.896 |
| 155 | IPI00178440.3 | Elongation factor 1-beta                                   | 2.598 | 2.042 | 0.763 |
| 156 | IPI00026202.1 | 60S ribosomal protein L18a                                 | 2.840 | 1.865 | 0.699 |
| 157 | IPI00759832.1 | Isoform Short of 14-3-3 protein beta/alpha                 | 2.380 | 1.672 | 0.702 |
| 158 | IPI00794545.1 | deoxyuridine 5'-triphosphate nucleotidohydrolase, mitoch   | 2.982 | 2.176 | 0.735 |
| 159 | IPI00215914.5 | ADP-ribosylation factor 1                                  | 3.212 | 2.464 | 0.767 |
| 160 | IPI00025491.1 | Eukaryotic initiation factor 4A-I                          | 1.982 | 2.041 | 1.041 |
| 161 | IPI01012872.1 | 58 kDa protein                                             | 2.907 | 1.608 | 0.569 |
| 162 | IPI00982539.1 | Dha kinase/FMN cyclase splice variant                      | 2.604 | 1.808 | 0.694 |
| 163 | IPI00553169.5 | filamin A, alpha                                           | 3.595 | 2.753 | 0.769 |
| 164 | IPI00952778.2 | Isoform 1 of Probable ATP-dependent RNA helicase DDX17     | 2.188 | 2.166 | 0.998 |
| 165 | IPI00479306.1 | Isoform 1 of Proteasome subunit beta type-5                | 2.075 | 1.847 | 0.890 |
| 166 | IPI00335168.9 | Isoform Non-muscle of Myosin light polypeptide 6           | 3.051 | 2.311 | 0.757 |
| 167 | IPI00383539.5 | Citrate synthase                                           | 2.626 | 2.139 | 0.840 |
| 168 | IPI00015018.1 | Inorganic pyrophosphatase                                  | 2.877 | 3.493 | 1.068 |
| 169 | IPI00291467.7 | ADP/ATP translocase 3                                      | 1.906 | 1.540 | 0.808 |
| 170 | IPI00007188.6 | ADP/ATP translocase 2                                      | 2.710 | 2.043 | 0.754 |
| 171 | IPI00455457.4 | Histone H3                                                 | 3.622 | 2.653 | 0.670 |
| 172 | IPI00867533.1 | 60S ribosomal protein L6                                   | 4.121 | 3.937 | 0.954 |
| 173 | IPI00940237.1 | ATP-dependent RNA helicase DDX39A                          | 2.267 | 2.190 | 0.966 |
| 174 | IPI00908881.2 | Glucose-6-phosphate isomerase                              | 1.526 | 1.871 | 0.995 |
| 175 | IPI00019502.3 | Isoform 1 of Myosin-9                                      | 3.147 | 2.392 | 0.799 |
| 176 | IPI00303722.5 | Protein FAM136A                                            | 2.845 | 2.172 | 0.760 |
| 177 | IPI00853337.1 | ADP-ribosylation factor 5                                  | 2.486 | 1.525 | 0.613 |
| 178 | IPI00011454.1 | Isoform 2 of Neutral alpha-glucosidase AB                  | 1.920 | 1.740 | 0.923 |
| 179 | IPI00642042.3 | Putative uncharacterized protein DKFZp686J1372             | 2.689 | 2.093 | 0.735 |
| 180 | IPI00413641.7 | Aldose reductase                                           | 2.471 | 2.503 | 1.050 |
| 181 | IPI00893035.1 | carbamoyl-phosphate synthetase 2, aspartate transcarb      | 3.780 | 2.951 | 0.803 |
| 182 | IPI00909975.1 | Ubiquitin carrier protein                                  | 3.120 | 2.066 | 0.677 |
| 183 | IPI00979136.1 | Ribonucleoside-diphosphate reductase                       | 3.118 | 2.590 | 0.857 |
| 184 | IPI00646055.2 | cDNA FLJ58608, highly similar to Heat shock protein 75 kDa | 2.115 | 1.816 | 0.968 |
| 185 | IPI00307524.7 | Arsenite methyltransferase                                 | 2.513 | 1.947 | 0.782 |

|     |                |                                                             |       |       |       |
|-----|----------------|-------------------------------------------------------------|-------|-------|-------|
| 186 | IPI00221092.8  | 40S ribosomal protein S16                                   | 2.986 | 1.775 | 0.548 |
| 187 | IPI00553185.2  | T-complex protein 1 subunit gamma                           | 2.158 | 1.318 | 0.666 |
| 188 | IPI00909336.1  | cDNA FLJ59092                                               | 2.392 | 2.960 | 1.100 |
| 189 | IPI00550689.3  | tRNA-splicing ligase RtcB homolog                           | 2.903 | 2.518 | 0.807 |
| 190 | IPI00219306.1  | Protein mago nashi homolog                                  | 3.163 | 2.403 | 0.724 |
| 191 | IPI01012504.1  | 6-phosphogluconate dehydrogenase, decarboxylating           | 2.080 | 1.981 | 0.983 |
| 192 | IPI00218988.4  | Isoform 2 of Adenylate kinase 2, mitochondrial              | 2.317 | 1.885 | 0.808 |
| 193 | IPI00925196.2  | IMP dehydrogenase 2                                         | 2.465 | 2.711 | 1.194 |
| 194 | IPI00008964.3  | Ras-related protein Rab-1B                                  | 2.501 | 1.906 | 0.769 |
| 195 | IPI00977640.1  | sodium/potassium-transporting ATPase subunit alpha-1 i      | 3.750 | 2.818 | 0.748 |
| 196 | IPI00878876.1  | cDNA FLJ51872, highly similar to Small nuclear ribonucleop  | 4.885 | 2.883 | 0.658 |
| 197 | IPI00012750.3  | 40S ribosomal protein S25                                   | 2.879 | 2.375 | 0.703 |
| 198 | IPI00418262.5  | Fructose-bisphosphate aldolase                              |       |       | 0.701 |
| 199 | IPI00943894.1  | glycogen phosphorylase, liver form isoform 2                | 1.981 | 1.804 | 0.910 |
| 200 | IPI00845388.1  | destrin isoform b                                           | 3.043 | 2.164 | 0.711 |
| 201 | IPI00550363.3  | Transgelin-2                                                | 2.331 | 2.020 | 0.854 |
| 202 | IPI00419880.6  | 40S ribosomal protein S3a                                   | 2.572 | 1.882 | 0.704 |
| 203 | IPI00216613.1  | Isoform Short of Splicing factor, proline- and glutamine-ri | 2.088 | 1.825 | 0.874 |
| 204 | IPI00045498.4  | Isoform 3 of Heterogeneous nuclear ribonucleoprotein D-     | 2.142 | 2.281 | 1.053 |
| 205 | IPI00219617.5  | Isoform 1 of Ribose-phosphate pyrophosphokinase 2           | 3.052 | 3.192 | 1.046 |
| 206 | IPI00944455.2  | NCAPD2 protein (Fragment)                                   | 3.607 | 2.731 | 0.757 |
| 207 | IPI01015230.1  | cDNA FLJ53354, highly similar to Puromycin-sensitive amin   | 2.147 | 2.138 | 0.946 |
| 208 | IPI00221093.7  | 40S ribosomal protein S17                                   | 3.664 | 2.495 | 0.679 |
| 209 | IPI00009328.4  | Eukaryotic initiation factor 4A-III                         | 2.328 | 2.164 | 0.892 |
| 210 | IPI00300371.5  | Isoform 1 of Splicing factor 3B subunit 3                   | 3.437 | 2.744 | 0.861 |
| 211 | IPI00021828.1  | Cystatin-B                                                  | 3.225 | 1.946 | 0.556 |
| 212 | IPI00003949.1  | Ubiquitin-conjugating enzyme E2 N                           | 3.313 | 1.931 | 0.777 |
| 213 | IPI00182533.5  | 60S ribosomal protein L28                                   | 3.884 | 2.581 | 0.662 |
| 214 | IPI00013214.2  | cDNA FLJ55599, highly similar to DNA replication licensing  | 2.176 | 1.988 | 0.848 |
| 215 | IPI00982482.2  | isoleucyl-tRNA synthetase                                   | 3.378 | 2.595 | 0.872 |
| 216 | IPI00022597.1  | NEDD8-conjugating enzyme Ubc12                              | 2.581 | 1.817 | 0.774 |
| 217 | IPI00010153.5  | 60S ribosomal protein L23                                   | 3.639 | 2.198 | 0.614 |
| 218 | IPI00220301.5  | Peroxiredoxin-6                                             | 2.928 | 2.133 | 0.782 |
| 219 | IPI00402182.2  | Isoform 2 of Heterogeneous nuclear ribonucleoprotein Q      | 2.531 | 1.013 | 0.400 |
| 220 | IPI00005719.1  | Isoform 1 of Ras-related protein Rab-1A                     | 1.923 | 1.450 | 0.754 |
| 221 | IPI00981739.1  | tubulin folding cofactor A                                  | 3.239 | 1.791 | 0.609 |
| 222 | IPI00102128.1  | Isoform 1 of Protein arginine N-methyltransferase 6         | 2.516 | 1.250 | 0.508 |
| 223 | IPI00022239.7  | Methionine aminopeptidase 1                                 | 2.676 | 2.228 | 0.813 |
| 224 | IPI00217030.10 | 40S ribosomal protein S4, X isoform                         | 2.486 | 1.903 | 0.772 |
| 225 | IPI01013843.1  | cDNA FLJ59776, highly similar to Prefoldin subunit 3        | 2.072 | 1.488 | 0.718 |
| 226 | IPI00220834.8  | X-ray repair cross-complementing protein 5                  | 2.113 | 1.852 | 0.879 |
| 227 | IPI00221088.5  | 40S ribosomal protein S9                                    | 2.907 | 2.537 | 0.976 |
| 228 | IPI00008240.2  | Methionyl-tRNA synthetase, cytoplasmic                      | 1.964 | 2.173 | 0.995 |
| 229 | IPI00740142.2  | u5 small nuclear ribonucleoprotein 200 kDa helicase-like    | 3.199 | 2.812 | 0.858 |
| 230 | IPI00021840.1  | 40S ribosomal protein S6                                    | 3.472 | 2.882 | 0.813 |
| 231 | IPI00908512.2  | cystathionine gamma-lyase isoform 3                         | 2.494 | 2.115 | 0.808 |
| 232 | IPI00798375.2  | cDNA FLJ59357, highly similar to Probable ATP-dependent     | 2.658 | 0.980 | 0.369 |

|     |               |                                                              |       |       |       |
|-----|---------------|--------------------------------------------------------------|-------|-------|-------|
| 233 | IPI00004860.2 | Isoform Complexed of Arginyl-tRNA synthetase, cytoplasm      | 2.576 | 1.219 | 0.473 |
| 234 | IPI00477179.1 | Isoform 2 of Nucleolar RNA helicase 2                        | 2.271 | 1.707 | 0.847 |
| 235 | IPI00465044.2 | Protein RCC2                                                 | 2.981 | 2.172 | 0.727 |
| 236 | IPI00856038.2 | cDNA FLJ53358, highly similar to Heterogeneous nuclear ri    | 2.205 | 1.740 | 0.804 |
| 237 | IPI00514399.1 | ribosomal protein S27                                        | 1.900 | 1.000 | 0.559 |
| 238 | IPI00940673.1 | cDNA FLJ53217, highly similar to Transketolase               | 2.582 | 3.725 | 1.362 |
| 239 | IPI00021187.4 | Isoform 1 of RuvB-like 1                                     | 1.819 | 1.867 | 1.022 |
| 240 | IPI00604431.1 | Isoform 2 of Cullin-associated NEDD8-dissociated protein     | 2.267 | 2.225 | 0.949 |
| 241 | IPI00007611.1 | ATP synthase subunit O, mitochondrial                        | 1.998 | 1.504 | 0.705 |
| 242 | IPI00013894.1 | Stress-induced-phosphoprotein 1                              | 2.512 | 1.696 | 0.706 |
| 243 | IPI00646689.1 | Thioredoxin domain-containing protein 17                     | 3.272 | 2.008 | 0.568 |
| 244 | IPI00965913.1 | albumin                                                      | 2.578 | 1.305 | 0.508 |
| 245 | IPI00219156.7 | 60S ribosomal protein L30                                    | 4.698 | 2.475 | 0.686 |
| 246 | IPI00924816.1 | Myotrophin                                                   | 1.810 | 1.083 | 0.608 |
| 247 | IPI00915869.3 | malate dehydrogenase, cytoplasmic isoform 3                  | 2.573 | 2.287 | 0.927 |
| 248 | IPI00643915.1 | Peptidyl-prolyl cis-trans isomerase                          | 2.714 | 2.379 | 0.696 |
| 249 | IPI00395887.4 | Thioredoxin-related transmembrane protein 1                  | 2.699 | 2.919 | 1.099 |
| 250 | IPI00296370.2 | leucine carboxyl methyltransferase 1                         | 2.590 | 2.312 | 0.966 |
| 251 | IPI00304612.9 | 60S ribosomal protein L13a                                   | 3.102 | 2.334 | 0.772 |
| 252 | IPI00031517.1 | DNA replication licensing factor MCM6                        | 2.099 | 1.930 | 0.867 |
| 253 | IPI00299904.3 | Isoform 1 of DNA replication licensing factor MCM7           | 2.430 | 1.976 | 0.877 |
| 254 | IPI00745335.7 | Isoform Cytoplasmic of Phospholipid hydroperoxide gluta      | 2.756 | 2.100 | 0.748 |
| 255 | IPI00908754.1 | cDNA FLJ50714, moderately similar to Ras-related protein     | 1.763 | 1.468 | 0.807 |
| 256 | IPI00967721.1 | matrin 3                                                     | 2.682 | 2.000 | 0.763 |
| 257 | IPI00472176.1 | Isoform 2 of tRNA (uracil-5-)-methyltransferase homolog A    | 2.569 | 2.333 | 0.875 |
| 258 | IPI00008438.1 | 40S ribosomal protein S10                                    | 2.798 | 2.803 | 0.869 |
| 259 | IPI00329633.5 | Threonyl-tRNA synthetase, cytoplasmic                        | 2.395 | 1.897 | 0.802 |
| 260 | IPI00893541.1 | protein disulfide isomerase family A, member 3               | 2.220 | 1.366 | 0.615 |
| 261 | IPI00293655.3 | ATP-dependent RNA helicase DDX1                              | 2.810 | 2.056 | 0.758 |
| 262 | IPI00550746.4 | Nuclear migration protein nudC                               | 2.717 | 1.852 | 0.658 |
| 263 | IPI00301434.4 | Bola-like protein 2                                          | 2.338 | 1.446 | 0.631 |
| 264 | IPI00651660.1 | 60S ribosomal protein L3 isoform b                           | 2.433 | 2.268 | 0.862 |
| 265 | IPI00009032.1 | Lupus La protein                                             | 1.876 | 1.758 | 0.898 |
| 266 | IPI00456747.1 | ATP synthase, H+ transporting, mitochondrial F0 complex,     | 1.850 | 1.564 | 0.759 |
| 267 | IPI00030363.1 | Acetyl-CoA acetyltransferase, mitochondrial                  | 2.532 | 1.857 | 0.787 |
| 268 | IPI00843996.1 | cDNA FLJ52832, highly similar to Splicing factor, arginine/s | 2.677 | 1.839 | 0.649 |
| 269 | IPI00026824.2 | Heme oxygenase 2                                             | 2.245 | 2.627 | 1.105 |
| 270 | IPI00395674.1 | Isoform SM-B of Small nuclear ribonucleoprotein-associat     | 2.976 | 2.256 | 0.716 |
| 271 | IPI00010157.1 | S-adenosylmethionine synthase isoform type-2                 | 2.363 | 2.295 | 0.978 |
| 272 | IPI00555749.1 | Proteasome 26S ATPase subunit 5 variant (Fragment)           | 2.682 | 1.170 | 0.435 |
| 273 | IPI00027834.3 | Heterogeneous nuclear ribonucleoprotein L                    | 2.854 | 1.555 | 0.545 |
| 274 | IPI00020599.1 | Calreticulin                                                 | 2.525 | 1.775 | 0.697 |
| 275 | IPI00977964.1 | ribosomal protein L27a                                       | 3.685 | 2.431 | 0.638 |
| 276 | IPI00019359.4 | Keratin, type I cytoskeletal 9                               | 2.577 | 1.511 | 0.652 |
| 277 | IPI00795892.1 | profilin 2                                                   | 3.048 | 1.752 | 0.665 |
| 278 | IPI00471928.6 | ATP synthase subunit alpha                                   | 1.604 | 1.740 | 1.180 |
| 279 | IPI00012493.1 | 40S ribosomal protein S20                                    | 3.104 | 1.922 | 0.824 |

|     |                |                                                            |       |       |       |
|-----|----------------|------------------------------------------------------------|-------|-------|-------|
| 280 | IPI00220637.5  | Seryl-tRNA synthetase, cytoplasmic                         | 2.726 | 1.918 | 0.693 |
| 281 | IPI00297579.4  | Chromobox protein homolog 3                                | 2.491 | 1.767 | 0.726 |
| 282 | IPI00908647.1  | cDNA FLJ59942, highly similar to Prostaglandin E synthase  | 2.397 | 1.828 | 0.751 |
| 283 | IPI00910830.1  | cDNA FLJ57715, highly similar to Voltage-dependent anion   | 3.417 | 3.018 | 0.883 |
| 284 | IPI00021700.3  | Proliferating cell nuclear antigen                         | 2.613 | 3.443 | 1.242 |
| 285 | IPI00305383.1  | Cytochrome b-c1 complex subunit 2, mitochondrial           | 2.426 | 1.724 | 0.714 |
| 286 | IPI00247583.5  | 60S ribosomal protein L21                                  | 2.955 | 2.268 | 0.785 |
| 287 | IPI00219905.1  | Isoform B of tRNA (cytosine(38)-C(5))-methyltransferase    | 2.473 | 1.993 | 0.806 |
| 288 | IPI00009104.7  | RuvB-like 2                                                | 1.944 | 1.952 | 0.971 |
| 289 | IPI01009538.1  | Putative uncharacterized protein DKFZp781B11202            | 1.822 | 2.116 | 1.069 |
| 290 | IPI00019329.1  | Dynein light chain 1, cytoplasmic                          | 2.437 | 1.197 | 0.490 |
| 291 | IPI00026268.3  | Guanine nucleotide-binding protein G(I)/G(S)/G(T) subunit  | 2.580 | 2.206 | 0.960 |
| 292 | IPI00642457.1  | adenine phosphoribosyltransferase isoform b                | 1.561 | 1.470 | 0.926 |
| 293 | IPI00000811.2  | Proteasome subunit beta type-6                             | 2.219 | 1.643 | 0.737 |
| 294 | IPI00396321.1  | Leucine-rich repeat-containing protein 59                  | 2.733 | 2.549 | 1.010 |
| 295 | IPI00470610.4  | Proline-5-carboxylate reductase 2                          | 2.730 | 2.912 | 1.064 |
| 296 | IPI00024993.4  | Enoyl-CoA hydratase, mitochondrial                         | 2.291 | 1.794 | 0.768 |
| 297 | IPI00643876.2  | cDNA FLJ50466, highly similar to DNA (cytosine-5)-methyltr | 2.055 | 2.223 | 1.082 |
| 298 | IPI00759663.1  | Isoform Cytoplasmic+peroxisomal of Peroxiredoxin-5, mito   | 2.772 | 2.273 | 0.738 |
| 299 | IPI00412579.6  | 60S ribosomal protein L10a                                 | 2.883 | 2.014 | 0.655 |
| 300 | IPI00983652.2  | cDNA FLJ61021, highly similar to Far upstream element-bir  | 2.515 | 1.037 | 0.412 |
| 301 | IPI00299177.4  | Isoform 1 of Cat eye syndrome critical region protein 5    | 2.661 | 2.257 | 0.907 |
| 302 | IPI00792330.2  | ADP-ribosylation factor 4                                  | 2.831 | 1.794 | 0.634 |
| 303 | IPI00640006.1  | rab GDP dissociation inhibitor beta isoform 2              | 2.195 | 1.889 | 0.898 |
| 304 | IPI00003168.1  | Phosphoribosyl pyrophosphate synthase-associated prote     | 2.765 | 3.034 | 1.025 |
| 305 | IPI00794610.2  | dnaJ homolog subfamily C member 7 isoform 2                | 3.180 | 2.308 | 0.787 |
| 306 | IPI00760588.2  | Isoform 5 of Double-stranded RNA-specific adenosine dea    | 2.359 | 2.056 | 0.954 |
| 307 | IPI00655650.2  | 40S ribosomal protein S26                                  | 3.956 | 2.386 | 0.575 |
| 308 | IPI00927101.1  | Uncharacterized protein                                    | 2.348 | 2.029 | 0.762 |
| 309 | IPI00016572.1  | Small nuclear ribonucleoprotein G                          | 2.693 | 1.639 | 0.603 |
| 310 | IPI00298961.3  | Exportin-1                                                 | 2.290 | 2.011 | 0.807 |
| 311 | IPI00179953.2  | Isoform 1 of Nuclear autoantigenic sperm protein           | 4.306 | 2.624 | 0.660 |
| 312 | IPI00026271.5  | 40S ribosomal protein S14                                  | 3.324 | 2.093 | 0.618 |
| 313 | IPI00332511.5  | Serine/threonine-protein phosphatase 2A 55 kDa regulato    | 2.089 | 2.177 | 0.998 |
| 314 | IPI00219757.13 | Glutathione S-transferase P                                | 2.255 | 1.558 | 0.746 |
| 315 | IPI00453473.6  | Histone H4                                                 | 3.666 | 1.977 | 0.580 |
| 316 | IPI00644653.1  | cDNA FLJ56337, highly similar to High mobility group prote | 2.632 | 2.074 | 0.774 |
| 317 | IPI00946221.1  | ribosomal protein L24                                      | 3.166 | 2.986 | 0.959 |
| 318 | IPI00430813.3  | Isoform 2 of Cellular nucleic acid-binding protein         | 3.452 | 2.328 | 0.743 |
| 319 | IPI01012383.1  | OTU domain, ubiquitin aldehyde binding 1                   | 2.543 | 2.404 | 1.055 |
| 320 | IPI00927892.1  | Mitochondrial-processing peptidase subunit beta            | 1.884 | 2.027 | 1.006 |
| 321 | IPI00964409.3  | heat shock 70kDa protein 4-like                            | 1.898 | 1.798 | 0.896 |
| 322 | IPI00023344.2  | Isoform 1 of Symplekin                                     | 2.770 | 2.882 | 0.969 |
| 323 | IPI00009901.1  | Nuclear transport factor 2                                 | 1.866 | 1.086 | 0.528 |
| 324 | IPI00029266.1  | Small nuclear ribonucleoprotein E                          | 5.050 | 2.859 | 0.671 |
| 325 | IPI00964686.1  | heterogeneous nuclear ribonucleoprotein A/B                | 2.133 | 2.047 | 0.923 |
| 326 | IPI00016513.5  | Ras-related protein Rab-10                                 | 2.019 | 1.484 | 0.735 |

|     |                |                                                              |       |       |       |
|-----|----------------|--------------------------------------------------------------|-------|-------|-------|
| 327 | IPI01014727.1  | cDNA FLJ51983, highly similar to Phosphoglycerate mutase     | 2.442 | 2.157 | 0.830 |
| 328 | IPI00299573.12 | 60S ribosomal protein L7a                                    | 3.146 | 2.365 | 0.761 |
| 329 | IPI00926977.1  | 26S protease regulatory subunit 10B                          | 2.729 | 2.219 | 0.763 |
| 330 | IPI00792916.2  | glucosidase 2 subunit beta isoform 2                         | 3.032 | 3.188 | 1.019 |
| 331 | IPI00027223.2  | Isocitrate dehydrogenase [NADP] cytoplasmic                  | 2.772 | 2.171 | 0.708 |
| 332 | IPI00218829.9  | Eukaryotic peptide chain release factor GTP-binding subu     | 2.355 | 2.137 | 0.924 |
| 333 | IPI00336094.5  | Isoform 2 of 3-hydroxyacyl-CoA dehydrogenase type-2          | 2.776 | 2.180 | 0.829 |
| 334 | IPI00156374.6  | Isoform 1 of Importin-4                                      | 3.711 | 3.138 | 0.955 |
| 335 | IPI00081836.3  | Histone H2A type 1-H                                         | 2.610 | 1.777 | 0.614 |
| 336 | IPI00926258.1  | proteasome (prosome, macropain) 26S subunit, non-ATPa        | 1.455 | 1.847 | 1.170 |
| 337 | IPI00215780.5  | 40S ribosomal protein S19                                    | 3.179 | 1.974 | 0.706 |
| 338 | IPI00290416.3  | Isoform 1 of Obg-like ATPase 1                               | 2.705 | 1.428 | 0.566 |
| 339 | IPI00019927.2  | 26S proteasome non-ATPase regulatory subunit 7               | 2.663 | 2.910 | 1.093 |
| 340 | IPI00984839.1  | ATP-dependent RNA helicase DDX3X isoform 2                   | 2.773 | 2.187 | 0.789 |
| 341 | IPI01015454.1  | PPM1G protein                                                | 2.933 | 2.651 | 0.882 |
| 342 | IPI00644712.4  | X-ray repair cross-complementing protein 6                   | 1.530 | 1.665 | 1.054 |
| 343 | IPI00031522.2  | Trifunctional enzyme subunit alpha, mitochondrial            | 2.241 | 1.706 | 0.807 |
| 344 | IPI00964635.1  | annexin A5                                                   | 2.091 | 1.914 | 0.908 |
| 345 | IPI00479877.4  | 4-trimethylaminobutyraldehyde dehydrogenase                  | 2.028 | 2.119 | 0.944 |
| 346 | IPI00640037.2  | cDNA FLJ38496 fis, clone FELIV1000137, highly similar to 60S | 2.537 | 2.810 | 1.121 |
| 347 | IPI00030706.1  | Activator of 90 kDa heat shock protein ATPase homolog 1      | 2.822 | 2.150 | 0.767 |
| 348 | IPI00927606.1  | Glutathione peroxidase 1                                     | 2.790 | 2.052 | 0.766 |
| 349 | IPI00940851.1  | ELAV-like protein 1                                          | 2.616 | 1.754 | 0.702 |
| 350 | IPI00001159.11 | Translational activator GCN1                                 | 3.908 | 2.981 | 0.757 |
| 351 | IPI00170924.2  | Histidine triad nucleotide-binding protein 3                 | 1.997 | 1.849 | 0.977 |
| 352 | IPI00029631.1  | Enhancer of rudimentary homolog                              | 2.223 | 1.190 | 0.535 |
| 353 | IPI00382699.2  | Isoform 5 of Filamin-B                                       | 3.789 | 3.114 | 0.822 |
| 354 | IPI00010882.3  | Isoform DFF45 of DNA fragmentation factor subunit alpha      | 2.698 | 2.386 | 0.856 |
| 355 | IPI00300074.4  | Phenylalanyl-tRNA synthetase beta chain                      | 2.935 | 3.910 | 1.007 |
| 356 | IPI00759824.2  | Isoform 2 of Acidic leucine-rich nuclear phosphoprotein 3    | 2.556 | 2.023 | 0.840 |
| 357 | IPI00032872.3  | 28S ribosomal protein S16, mitochondrial                     | 3.591 | 2.262 | 0.645 |
| 358 | IPI00910697.1  | cDNA FLJ53703, highly similar to Histidyl-tRNA synthetase    | 1.774 | 1.922 | 1.084 |
| 359 | IPI00293276.10 | Macrophage migration inhibitory factor                       | 2.049 | 1.409 | 0.788 |
| 360 | IPI00012772.8  | 60S ribosomal protein L8                                     | 3.265 | 2.461 | 0.698 |
| 361 | IPI00888475.2  | Isoform 6 of Microtubule-associated protein 4                | 3.971 | 3.064 | 0.814 |
| 362 | IPI01011421.1  | Dihydrolipoyl dehydrogenase                                  | 2.756 | 2.171 | 0.763 |
| 363 | IPI00005511.1  | PHD finger-like domain-containing protein 5A                 | 4.239 | 2.264 | 0.616 |
| 364 | IPI00003588.1  | Eukaryotic translation elongation factor 1 epsilon-1         | 2.903 | 2.165 | 0.801 |
| 365 | IPI00910438.1  | cDNA FLJ54574, highly similar to Staphylococcal nuclease d   | 2.253 | 2.024 | 0.894 |
| 366 | IPI00291783.4  | Gem-associated protein 5                                     | 3.627 | 3.024 | 0.839 |
| 367 | IPI00026167.5  | NHP2-like protein 1                                          | 2.445 | 1.411 | 0.607 |
| 368 | IPI01009775.1  | cDNA FLJ52574, highly similar to Septin-7                    | 2.080 | 1.889 | 0.920 |
| 369 | IPI00006865.4  | Vesicle-trafficking protein SEC22b                           | 2.504 | 1.632 | 0.660 |
| 370 | IPI00216425.1  | Isoform 2 of Testin                                          | 2.406 | 2.635 | 1.085 |
| 371 | IPI00011913.1  | Heterogeneous nuclear ribonucleoprotein A0                   | 2.423 | 3.772 | 1.167 |
| 372 | IPI00177817.4  | Isoform 2 of Sarcoplasmic/endoplasmic reticulum calcium      | 3.494 | 2.739 | 0.799 |



|     |               |                                                            |       |       |       |
|-----|---------------|------------------------------------------------------------|-------|-------|-------|
| 373 | IPI00219994.2 | Isoform 3 of Exportin-2                                    | 2.087 | 2.078 | 0.893 |
| 374 | IPI00376503.2 | pyrroline-5-carboxylate reductase 1, mitochondrial isoform | 2.419 | 1.740 | 0.719 |
| 375 | IPI00335069.2 | 26S proteasome non-ATPase regulatory subunit 12 isoform    | 2.009 | 1.933 | 0.938 |
| 376 | IPI00026519.1 | Peptidyl-prolyl cis-trans isomerase F, mitochondrial       | 2.359 | 1.834 | 0.706 |
| 377 | IPI00964515.1 | guanine nucleotide binding protein (G protein), beta poly  | 2.204 | 1.897 | 0.878 |
| 378 | IPI00218493.7 | Hypoxanthine-guanine phosphoribosyltransferase             | 2.658 | 2.172 | 0.824 |
| 379 | IPI00304417.7 | Isocitrate dehydrogenase [NAD] subunit beta, mitochondr    | 2.485 | 1.925 | 0.786 |
| 380 | IPI00945620.1 | guanine monphosphate synthetase                            | 2.460 | 2.106 | 0.944 |
| 381 | IPI00456695.1 | Isoform 2 of 26S proteasome non-ATPase regulatory subur    | 1.743 | 2.146 | 1.023 |
| 382 | IPI00479934.1 | non-specific lipid-transfer protein isoform 4 proprotein   | 3.317 | 1.981 | 0.611 |
| 383 | IPI00011916.1 | Aminoacyl tRNA synthase complex-interacting multifuncti    | 2.563 | 3.257 | 1.235 |
| 384 | IPI00215911.3 | DNA-(apurinic or apyrimidinic site) lyase                  | 2.407 | 2.613 | 1.078 |
| 385 | IPI00005024.3 | Isoform 1 of Myb-binding protein 1A                        | 4.018 | 3.097 | 0.797 |
| 386 | IPI00877948.1 | Minichromosome maintenance complex component 5             | 1.991 | 2.491 | 1.079 |
| 387 | IPI00953696.1 | glutathione reductase, mitochondrial isoform 4 precursor   | 1.697 | 1.817 | 1.064 |
| 388 | IPI01012867.1 | ubiquitin-conjugating enzyme E2 variant 2                  | 2.900 | 2.056 | 0.709 |
| 389 | IPI00867679.2 | cDNA FLJ51729, highly similar to Proteasome subunit alpha  | 2.355 | 1.934 | 0.762 |
| 390 | IPI00879160.1 | RAN binding protein 1                                      | 2.349 | 1.866 | 0.735 |
| 391 | IPI00291646.3 | Methylenetetrahydrofolate dehydrogenase (NADP+ depen       | 2.101 | 1.845 | 0.820 |
| 392 | IPI00306960.3 | Asparaginyl-tRNA synthetase, cytoplasmic                   | 2.708 | 1.922 | 0.698 |
| 393 | IPI00922359.1 | Protein-L-isoaspartate O-methyltransferase                 | 2.136 | 1.790 | 0.743 |
| 394 | IPI00012795.3 | Eukaryotic translation initiation factor 3 subunit I       | 2.873 | 2.932 | 1.077 |
| 395 | IPI00020127.1 | Replication protein A 70 kDa DNA-binding subunit           | 2.588 | 0.928 | 0.421 |
| 396 | IPI00644668.3 | Four and a half LIM domains 1                              | 3.269 | 2.602 | 0.797 |
| 397 | IPI00025874.2 | Dolichyl-diphosphooligosaccharide--protein glycosyltrans   | 3.456 | 2.953 | 1.200 |
| 398 | IPI00645201.1 | Ribosomal protein S8                                       | 3.017 | 2.595 | 0.804 |
| 399 | IPI00218830.1 | Isoform Short of Glycylpeptide N-tetradecanoyltransferase  | 2.927 | 2.990 | 0.837 |
| 400 | IPI01014177.1 | ST13 protein                                               | 2.168 | 2.041 | 0.934 |
| 401 | IPI00023647.4 | Isoform 1 of Ubiquitin-like modifier-activating enzyme 6   | 2.251 | 2.148 | 0.902 |
| 402 | IPI00026833.4 | Adenylosuccinate synthetase isozyme 2                      | 2.565 | 2.145 | 1.243 |
| 403 | IPI00306708.5 | Lymphokine-activated killer T-cell-originated protein kina | 3.457 | 2.599 | 0.826 |
| 404 | IPI00607884.2 | cDNA, FLJ79413, highly similar to Hematological and neuro  | 1.929 | 1.460 | 0.765 |
| 405 | IPI00414384.1 | Isoform 1 of Hydroxysteroid dehydrogenase-like protein 2   | 2.073 | 2.103 | 1.015 |
| 406 | IPI00026328.3 | Thioredoxin domain-containing protein 12                   | 2.484 | 2.130 | 0.871 |
| 407 | IPI00291175.7 | Isoform 1 of Vinculin                                      | 2.028 | 1.556 | 0.818 |
| 408 | IPI00549885.4 | Isoform 2 of Pyruvate dehydrogenase E1 component subur     | 2.172 | 2.300 | 1.117 |
| 409 | IPI00983098.1 | lysophospholipase I                                        | 1.953 | 1.515 | 0.842 |
| 410 | IPI00978288.1 | proteasome subunit beta type-2 isoform 2                   | 2.723 | 2.445 | 0.776 |
| 411 | IPI00783982.1 | Coatomer subunit gamma                                     | 2.143 | 2.359 | 1.145 |
| 412 | IPI00062037.1 | Dynein light chain 2, cytoplasmic                          | 2.072 | 1.349 | 0.651 |
| 413 | IPI00008552.6 | Glutaredoxin-3                                             | 2.738 | 2.448 | 0.902 |
| 414 | IPI00028055.4 | Transmembrane emp24 domain-containing protein 10           | 2.436 | 1.852 | 0.801 |
| 415 | IPI00917605.1 | cytochrome c, somatic                                      | 3.302 | 2.253 | 0.632 |
| 416 | IPI00788836.1 | dihydrolipoamide S-acetyltransferase                       | 2.669 | 2.481 | 0.899 |
| 417 | IPI00003886.3 | Isoform 2 of Guanine nucleotide-binding protein-like 3     | 2.995 | 1.429 | 0.410 |
| 418 | IPI00939560.1 | thioredoxin domain-containing protein 5 isoform 3          | 1.876 | 1.944 | 1.036 |
| 419 | IPI00783378.3 | Ubiquitin-conjugating enzyme E2 O                          | 3.249 | 2.757 | 0.879 |
| 420 | IPI00646415.1 | RAB14, member RAS oncogene family                          | 2.291 | 1.569 | 0.679 |

|     |               |                                                              |       |       |       |
|-----|---------------|--------------------------------------------------------------|-------|-------|-------|
| 421 | IPI01013402.1 | cDNA FLJ46429 fis, clone THYMU3014372, highly similar to D   | 2.748 | 3.522 | 0.980 |
| 422 | IPI00792135.2 | ATP5H protein (Fragment)                                     | 2.015 | 1.670 | 0.823 |
| 423 | IPI00397526.3 | Isoform 1 of Myosin-10                                       | 1.916 | 1.825 | 0.953 |
| 424 | IPI00963825.1 | ATP synthase, H+ transporting, mitochondrial Fo complex,     | 2.567 | 2.802 | 0.735 |
| 425 | IPI00001757.1 | Isoform 1 of RNA-binding protein 8A                          | 1.852 | 1.550 | 0.819 |
| 426 | IPI00004839.1 | Crk-like protein                                             | 3.577 | 3.226 | 0.874 |
| 427 | IPI00026089.4 | Splicing factor 3B subunit 1                                 | 3.141 | 2.627 | 0.814 |
| 428 | IPI00006980.1 | chromosome 14 open reading frame 166                         | 2.526 | 1.296 | 0.550 |
| 429 | IPI00554521.2 | Ferritin heavy chain                                         | 1.796 | 1.404 | 0.788 |
| 430 | IPI00786995.1 | DNA-dependent protein kinase catalytic subunit-like          | 3.054 | 2.815 | 0.887 |
| 431 | IPI00456969.1 | Cytoplasmic dynein 1 heavy chain 1                           | 3.743 | 2.938 | 0.818 |
| 432 | IPI00946636.2 | cDNA FLJ51804, highly similar to Vacuolar ATP synthase cat   | 2.456 | 2.394 | 0.955 |
| 433 | IPI00302850.4 | Small nuclear ribonucleoprotein Sm D1                        | 2.722 | 1.543 | 0.577 |
| 434 | IPI00645329.1 | Isoform 3 of Histone-binding protein RBBP4                   | 1.841 | 1.664 | 0.934 |
| 435 | IPI00465361.4 | 60S ribosomal protein L13                                    | 2.926 | 2.482 | 0.736 |
| 436 | IPI00977156.1 | eukaryotic translation initiation factor 3, subunit E        | 2.152 | 1.995 | 0.975 |
| 437 | IPI00218414.5 | Carbonic anhydrase 2                                         | 3.112 | 2.365 | 0.760 |
| 438 | IPI00291939.1 | Structural maintenance of chromosomes protein 1A             | 3.833 | 2.920 | 0.790 |
| 439 | IPI00514724.1 | Ubiquitin-conjugating enzyme E2 variant 1                    | 2.424 | 1.697 | 0.700 |
| 440 | IPI00294911.1 | Succinate dehydrogenase [ubiquinone] iron-sulfur subunit     | 2.630 | 2.067 | 0.795 |
| 441 | IPI00031570.1 | Cancer-related nucleoside-triphosphatase                     | 2.373 | 1.870 | 0.786 |
| 442 | IPI00982721.1 | transcription elongation factor B (SIII), polypeptide 1 (15k | 3.939 | 2.470 | 0.627 |
| 443 | IPI00294955.3 | U6 snRNA-associated Sm-like protein LSm4                     | 3.270 | 2.080 | 0.603 |
| 444 | IPI01009339.1 | paraspeckle component 1                                      | 2.809 | 1.405 | 0.500 |
| 445 | IPI00017963.1 | Small nuclear ribonucleoprotein Sm D2                        | 3.255 | 1.929 | 0.589 |
| 446 | IPI01014812.1 | cDNA FLJ52595, highly similar to Medium-chain specific ac    | 2.609 | 2.024 | 0.737 |
| 447 | IPI00642213.1 | RNA binding protein, autoantigenic                           | 2.319 | 2.608 | 1.074 |
| 448 | IPI00221091.9 | 40S ribosomal protein S15a                                   | 4.289 | 2.330 | 0.565 |
| 449 | IPI00063245.2 | far upstream element (FUSE) binding protein 3                | 2.680 | 2.252 | 0.840 |
| 450 | IPI00387130.1 | Isoform 1 of Anamorsin                                       | 3.692 | 3.417 | 0.892 |
| 451 | IPI00943173.1 | Coronin-1C                                                   | 3.450 | 2.288 | 0.723 |
| 452 | IPI00220667.3 | Isoform 4 of Hexokinase-1                                    | 1.491 | 1.603 | 0.919 |
| 453 | IPI00105598.3 | Proteasome 26S non-ATPase subunit 11 variant (Fragment)      | 1.822 | 2.353 | 1.232 |
| 454 | IPI00103467.5 | Aldehyde dehydrogenase X, mitochondrial                      | 1.766 | 1.931 | 1.153 |
| 455 | IPI00005613.3 | Splicing factor U2AF 35 kDa subunit                          | 2.546 | 2.539 | 0.988 |
| 456 | IPI01015738.1 | Alpha actinin 4 short isoform                                | 1.959 | 1.818 | 0.928 |
| 457 | IPI00031836.3 | Developmentally-regulated GTP-binding protein 1              | 2.864 | 2.459 | 0.859 |
| 458 | IPI00019640.1 | Serine/threonine-protein kinase VRK1                         | 2.123 | 2.207 | 1.040 |
| 459 | IPI00979610.1 | S-phase kinase-associated protein 1                          | 3.144 | 2.327 | 0.726 |
| 460 | IPI00927677.1 | heterogeneous nuclear ribonucleoprotein A3                   | 2.817 | 2.211 | 0.895 |
| 461 | IPI00021435.3 | 26S protease regulatory subunit 7                            | 1.684 | 1.884 | 1.093 |
| 462 | IPI00219025.3 | Glutaredoxin-1                                               | 1.888 | 0.717 | 0.380 |
| 463 | IPI00218568.7 | Pterin-4-alpha-carbinolamine dehydratase                     | 1.621 | 1.205 | 0.743 |
| 464 | IPI00014151.3 | 26S proteasome non-ATPase regulatory subunit 6               | 2.766 | 2.422 | 0.864 |
| 465 | IPI00009922.3 | SRA stem-loop-interacting RNA-binding protein, mitochon      | 2.769 | 1.678 | 0.597 |
| 466 | IPI00297982.7 | Eukaryotic translation initiation factor 2 subunit 3         | 1.987 | 1.966 | 0.985 |
| 467 | IPI01010654.1 | cDNA FLJ57899, highly similar to Mitotic checkpoint protein  | 2.735 | 2.133 | 0.776 |

|     |               |                                                            |       |       |       |
|-----|---------------|------------------------------------------------------------|-------|-------|-------|
| 468 | IPI01009456.1 | cDNA FLJ40884 fis, clone UTERU2000607, highly similar to A | 1.505 | 1.721 | 1.143 |
| 469 | IPI01015965.1 | eukaryotic translation elongation factor 1 delta (guanine  | 2.301 | 2.462 | 1.070 |
| 470 | IPI00925601.1 | 5-aminoimidazole-4-carboxamide ribonucleotide formyltr     | 3.186 | 2.035 | 0.683 |
| 471 | IPI01012099.1 | PRP6 pre-mRNA processing factor 6 homolog (S. cerevisiae   | 2.339 | 2.021 | 0.867 |
| 472 | IPI00304409.3 | Calcium-regulated heat stable protein 1                    | 2.495 | 2.039 | 0.702 |
| 473 | IPI00644813.1 | Small nuclear ribonucleoprotein polypeptide C              | 2.109 | 1.495 | 0.677 |
| 474 | IPI00745893.2 | small ubiquitin-related modifier 2 isoform b precursor     | 4.159 | 2.626 | 0.631 |
| 475 | IPI00295857.7 | Isoform 1 of Coatomer subunit alpha                        | 2.980 | 2.520 | 0.789 |
| 476 | IPI00334907.3 | Isoform 1 of Phosphatidylinositol transfer protein beta is | 2.168 | 2.397 | 1.108 |
| 477 | IPI00983658.1 | adenosine kinase isoform d                                 | 2.747 | 1.499 | 0.542 |
| 478 | IPI00008527.3 | 60S acidic ribosomal protein P1                            | 5.131 | 3.303 | 0.644 |
| 479 | IPI00942408.1 | Isoform 1 of Cyclin-dependent kinase inhibitor 2A, isoform | 4.106 | 2.614 | 0.637 |
| 480 | IPI00909229.1 | cDNA FLJ51308                                              | 1.955 | 1.410 | 0.623 |
| 481 | IPI00921820.1 | cDNA, FLJ78950, highly similar to Isocitrate dehydrogenase | 2.266 | 1.847 | 0.815 |
| 482 | IPI00945574.1 | RAB7A, member RAS oncogene family                          | 3.152 | 2.130 | 0.702 |
| 483 | IPI00023234.3 | SUMO-activating enzyme subunit 2                           | 2.170 | 1.908 | 0.938 |
| 484 | IPI00219153.4 | 60S ribosomal protein L22                                  | 2.934 | 1.647 | 0.530 |
| 485 | IPI00815843.1 | RPL14 protein (Fragment)                                   | 3.465 | 2.728 | 0.597 |
| 486 | IPI00977658.1 | Eukaryotic translation initiation factor 3 subunit H       | 3.359 | 2.620 | 0.767 |
| 487 | IPI00029557.3 | GrpE protein homolog 1, mitochondrial                      | 2.130 | 1.665 | 0.797 |
| 488 | IPI01009361.1 | N(alpha)-acetyltransferase 15, NatA auxiliary subunit      | 1.890 | 2.033 | 1.050 |
| 489 | IPI00012369.1 | Mitotic spindle assembly checkpoint protein MAD2A          | 1.973 | 1.541 | 0.727 |
| 490 | IPI00334627.3 | Putative annexin A2-like protein                           | 2.364 | 2.662 | 1.126 |
| 491 | IPI00878484.1 | Ewing sarcoma breakpoint region 1                          | 2.594 | 2.068 | 1.092 |
| 492 | IPI00977915.3 | HYOU1 protein                                              | 3.330 | 2.779 | 0.812 |
| 493 | IPI00170972.2 | UPF0553 protein C9orf64                                    | 2.533 | 2.287 | 1.054 |
| 494 | IPI00020451.4 | Isoform 1 of Protein IMPACT                                | 2.729 | 2.233 | 0.836 |
| 495 | IPI00013847.4 | Cytochrome b-c1 complex subunit 1, mitochondrial           | 2.240 | 1.852 | 0.827 |
| 496 | IPI00965680.1 | nucleoporin 155kDa                                         | 3.192 | 2.828 | 0.746 |
| 497 | IPI00218372.1 | Isoform 2 of Proteasome subunit alpha type-7               | 2.593 | 1.693 | 0.701 |
| 498 | IPI01015591.1 | cDNA FLJ55635, highly similar to pre-mRNA-splicing factorA | 2.664 | 2.080 | 0.781 |
| 499 | IPI00955815.2 | pyruvate dehydrogenase E1 component subunit alpha, so      | 1.993 | 1.311 | 0.641 |
| 500 | IPI00926495.1 | ribosomal protein L35a                                     | 4.530 | 2.216 | 0.524 |
| 501 | IPI00177008.1 | Phosphoglycolate phosphatase                               | 2.790 | 2.764 | 1.067 |
| 502 | IPI00016736.1 | Isoform 1 of 1-phosphatidylinositol-4,5-bisphosphate pho   | 4.052 | 2.856 | 0.603 |
| 503 | IPI00789792.1 | dynactin 2 (p50)                                           | 1.916 | 1.992 | 0.968 |
| 504 | IPI00020602.1 | Casein kinase II subunit alpha'                            | 4.707 | 4.464 | 0.948 |
| 505 | IPI01012417.1 | NOP2/Sun RNA methyltransferase family, member 2            | 2.007 | 2.081 | 0.938 |
| 506 | IPI00945855.1 | profilin 2                                                 | 4.255 | 2.485 | 0.584 |
| 507 | IPI01014975.1 | Talin 1                                                    | 4.295 | 3.187 | 0.767 |
| 508 | IPI00011698.4 | histone deacetylase complex subunit SAP18                  | 3.101 | 2.225 | 0.711 |
| 509 | IPI00909657.1 | cDNA FLJ50378, highly similar to Phenylalanyl-tRNA synthe  | 2.464 | 1.903 | 0.735 |
| 510 | IPI00787559.1 | thymidylate kinase isoform 2                               | 2.353 | 2.289 | 0.895 |
| 511 | IPI00299147.8 | Small ubiquitin-related modifier 3                         | 3.508 | 1.968 | 0.561 |
| 512 | IPI00983602.1 | mitochondrial carrier 2                                    | 4.026 | 4.743 | 1.093 |
| 513 | IPI00789806.2 | Isoform 2 of Cytosol aminopeptidase                        | 2.420 | 2.435 | 1.044 |
| 514 | IPI00514607.2 | Isoform 2 of Histone-arginine methyltransferase CARM1      | 3.223 | 2.208 | 0.733 |

|     |               |                                                                                          |       |       |       |
|-----|---------------|------------------------------------------------------------------------------------------|-------|-------|-------|
| 515 | IPI00647813.1 | Isoform 2 of Inosine-5'-monophosphate dehydrogenase 1                                    | 1.494 | 1.900 | 1.272 |
| 516 | IPI00895865.1 | electron transfer flavoprotein subunit alpha, mitochondrial                              | 2.323 | 1.938 | 0.934 |
| 517 | IPI00982162.1 | ras homolog family member C                                                              | 2.886 | 2.151 | 0.648 |
| 518 | IPI00215790.6 | 60S ribosomal protein L38                                                                | 2.347 | 1.232 | 0.544 |
| 519 | IPI00000643.1 | BAG family molecular chaperone regulator 2                                               | 2.173 | 1.462 | 0.682 |
| 520 | IPI01012205.1 | cDNA FLJ53863, highly similar to Cystathionine beta-synthase                             | 2.590 | 2.268 | 0.866 |
| 521 | IPI00513775.1 | Isoform 2 of 14 kDa phosphohistidine phosphatase                                         | 3.013 | 1.668 | 0.572 |
| 522 | IPI00908582.1 | cDNA FLJ50164, highly similar to Protein flightless-1 homolog                            | 3.886 | 2.917 | 0.736 |
| 523 | IPI00428288.1 | Isoform 4 of 39S ribosomal protein L43, mitochondrial                                    | 2.883 | 2.170 | 0.747 |
| 524 | IPI00295386.7 | Carbonyl reductase [NADPH] 1                                                             | 2.657 | 1.919 | 0.722 |
| 525 | IPI00022334.1 | Ornithine aminotransferase, mitochondrial                                                | 2.702 | 0.991 | 0.413 |
| 526 | IPI00022442.2 | Acyl carrier protein, mitochondrial                                                      | 2.275 | 1.668 | 0.768 |
| 527 | IPI00973884.1 | S-phase kinase-associated protein 1                                                      | 2.482 | 2.757 | 1.111 |
| 528 | IPI00759715.1 | Isoform Cytoplasmic of Fumarate hydratase, mitochondrial                                 | 2.456 | 2.400 | 1.000 |
| 529 | IPI01012065.1 | proteasome (prosome, macropain) subunit, alpha type, 1                                   | 2.530 | 2.068 | 0.831 |
| 530 | IPI00003327.1 | ADP-ribosylation factor-like protein 3                                                   | 2.868 | 2.050 | 0.770 |
| 531 | IPI00797249.1 | L-xylulose reductase isoform 2                                                           | 2.302 | 2.227 | 0.831 |
| 532 | IPI01012026.1 | chromodomain helicase DNA binding protein 4                                              | 3.096 | 2.470 | 0.830 |
| 533 | IPI00012202.1 | Methylosome protein 50                                                                   | 3.172 | 2.043 | 0.644 |
| 534 | IPI01009016.1 | Isoform 4 of Cellular tumor antigen p53                                                  | 1.880 | 1.768 | 0.932 |
| 535 | IPI00746004.2 | 40S ribosomal protein S27-like                                                           | 2.465 | 1.973 | 0.800 |
| 536 | IPI01014044.1 | Isoform 1 of NADH dehydrogenase [ubiquinone] 1 beta subunit                              | 2.259 | 1.868 | 0.752 |
| 537 | IPI00873286.2 | cDNA FLJ55750, highly similar to Eukaryotic translation initiation factor 4E             | 2.191 | 1.650 | 0.841 |
| 538 | IPI00171798.1 | Metastasis-associated protein MTA2                                                       | 2.589 | 2.486 | 0.956 |
| 539 | IPI00016786.1 | Isoform 2 of Cell division control protein 42 homolog                                    | 2.143 | 1.797 | 0.838 |
| 540 | IPI00908889.1 | cDNA FLJ54065, moderately similar to Mus musculus pituitary tumor transforming protein 1 | 1.954 | 1.726 | 0.912 |
| 541 | IPI00925237.1 | non-SMC condensin I complex, subunit H                                                   | 2.001 | 2.088 | 0.960 |
| 542 | IPI00980919.1 | Serine/threonine-protein phosphatase                                                     | 6.424 | 6.094 | 0.991 |
| 543 | IPI00006052.3 | Prefoldin subunit 2                                                                      | 3.667 | 2.536 | 0.622 |
| 544 | IPI00794581.1 | tropomodulin 2 (neuronal)                                                                | 1.697 | 1.011 | 0.596 |
| 545 | IPI00025039.1 | rRNA 2'-O-methyltransferase fibrillar in                                                 | 2.536 | 2.446 | 0.906 |
| 546 | IPI00853093.3 | Isoform 1 of Methyltransferase-like protein 2B                                           | 3.197 | 3.015 | 0.971 |
| 547 | IPI00550234.4 | Isoform 1 of Actin-related protein 2/3 complex subunit 5                                 | 2.465 | 1.953 | 0.674 |
| 548 | IPI00010130.3 | Glutamine synthetase                                                                     | 2.410 | 2.237 | 0.845 |
| 549 | IPI00219077.4 | Isoform 1 of Leukotriene A-4 hydrolase                                                   | 2.484 | 1.213 | 0.447 |
| 550 | IPI00384016.1 | Full-length cDNA 5-PRIME end of clone CS0DJ009YL13 of T. cuniculi                        | 1.767 | 1.653 | 0.943 |
| 551 | IPI00873948.3 | DNA-directed RNA polymerase                                                              | 3.095 | 2.516 | 0.773 |
| 552 | IPI00184284.6 | Isoform 2 of Vacuolar protein sorting-associated protein 2                               | 2.456 | 2.214 | 0.901 |
| 553 | IPI00419919.6 | Ribosomal protein L29                                                                    | 2.336 | 2.074 | 0.848 |
| 554 | IPI01018329.1 | cDNA FLJ57316, highly similar to DNA mismatch repair protein 1                           | 1.984 | 1.851 | 1.110 |
| 555 | IPI00029534.1 | Amidophosphoribosyltransferase                                                           | 2.647 | 1.966 | 0.743 |
| 556 | IPI00008454.1 | DnaJ homolog subfamily B member 11                                                       | 2.522 | 2.099 | 0.834 |
| 557 | IPI00332371.9 | Isoform 1 of 6-phosphofructokinase, liver type                                           | 1.713 | 2.082 | 1.216 |
| 558 | IPI00216508.3 | Isoform 2 of Sorting nexin-3                                                             | 2.738 | 1.960 | 0.670 |
| 559 | IPI00386755.2 | ERO1-like protein alpha                                                                  | 2.784 | 1.933 | 0.709 |
| 560 | IPI00743142.2 | Isoform 1 of 6-phosphofructokinase, muscle type                                          | 2.405 | 1.901 | 0.790 |
| 561 | IPI01010195.1 | cDNA FLJ55629, highly similar to Transcription elongation factor 1                       | 3.271 | 3.311 | 0.997 |

|     |               |                                                              |        |       |       |
|-----|---------------|--------------------------------------------------------------|--------|-------|-------|
| 562 | IPI00021785.2 | Cytochrome c oxidase subunit 5B, mitochondrial               | 2.684  | 1.725 | 0.609 |
| 563 | IPI01014174.1 | PRP19/PSO4 pre-mRNA processing factor 19 homolog (S. ce      | 2.372  | 2.729 | 0.945 |
| 564 | IPI00977749.1 | cysteine and histidine-rich domain (CHORD) containing 1      | 3.123  | 3.882 | 1.184 |
| 565 | IPI00026546.1 | Platelet-activating factor acetylhydrolase IB subunit beta   | 2.268  | 1.640 | 0.724 |
| 566 | IPI00946039.1 | tRNA methyltransferase 10 homolog C (S. cerevisiae)          | 2.603  | 2.502 | 0.922 |
| 567 | IPI00005087.1 | Tropomodulin-3                                               | 2.132  | 1.826 | 0.857 |
| 568 | IPI00250297.3 | L-aminoadipate-semialdehyde dehydrogenase-phosphop           | 4.238  | 3.259 | 0.987 |
| 569 | IPI00910113.1 | cDNA FLJ52902, highly similar to Rab GDP dissociation inh    | 4.334  | 3.106 | 0.717 |
| 570 | IPI00106495.1 | Condensin complex subunit 3                                  | 2.017  | 2.265 | 1.013 |
| 571 | IPI00007402.3 | Importin-7                                                   | 2.615  | 1.822 | 0.697 |
| 572 | IPI00641924.2 | 28S ribosomal protein S9, mitochondrial                      | 2.408  | 1.907 | 0.817 |
| 573 | IPI00982694.1 | serum amyloid A-like 1                                       | 3.281  | 2.116 | 0.627 |
| 574 | IPI00644349.4 | cDNA FLJ60449, highly similar to Homo sapiens prion prote    | 2.901  | 2.318 | 0.801 |
| 575 | IPI00556021.3 | DNA polymerase (Fragment)                                    | 3.485  | 3.511 | 1.007 |
| 576 | IPI00028946.2 | Isoform 3 of Reticulon-3                                     | 2.345  | 2.115 | 0.855 |
| 577 | IPI00215719.6 | 60S ribosomal protein L18                                    | 10.555 | 6.181 | 0.577 |
| 578 | IPI00219678.3 | Eukaryotic translation initiation factor 2 subunit 1         | 2.674  | 2.529 | 1.043 |
| 579 | IPI00013122.1 | Hsp90 co-chaperone Cdc37                                     | 1.887  | 2.117 | 1.122 |
| 580 | IPI00411937.4 | Nucleolar protein 56                                         | 2.125  | 2.111 | 0.993 |
| 581 | IPI01015342.1 | cDNA, FLJ79540, highly similar to Serine-threonine kinase    | 3.143  | 2.997 | 0.985 |
| 582 | IPI00433833.1 | THOC3 protein                                                | 2.658  | 2.099 | 0.813 |
| 583 | IPI00001589.1 | Mitochondrial import inner membrane translocase subun        | 1.973  | 1.296 | 0.657 |
| 584 | IPI00375145.1 | Isoform Short of Ubiquitin carboxyl-terminal hydrolase 5     | 2.251  | 2.200 | 0.977 |
| 585 | IPI00184821.1 | Isoform 1 of Bifunctional coenzyme A synthase                | 3.020  | 1.866 | 0.681 |
| 586 | IPI01010004.1 | cDNA FLJ50858, highly similar to Homo sapiens abhydrolas     | 1.905  | 1.037 | 0.789 |
| 587 | IPI00039626.3 | Isoform D of Constitutive coactivator of PPAR-gamma-like     | 4.051  | 3.011 | 0.747 |
| 588 | IPI00644724.1 | HIV-1 Tat specific factor 1                                  | 2.112  | 1.905 | 0.905 |
| 589 | IPI00937278.2 | 26S proteasome non-ATPase regulatory subunit 8               | 2.900  | 2.160 | 0.725 |
| 590 | IPI00893431.2 | cDNA FLJ53410, highly similar to Eukaryotic translation init | 2.062  | 2.161 | 1.048 |
| 591 | IPI00025019.3 | Proteasome subunit beta type-1                               | 2.227  | 1.719 | 0.755 |
| 592 | IPI00335385.4 | Scavenger mRNA-decapping enzyme Dcp5                         | 2.141  | 2.317 | 1.093 |
| 593 | IPI00552546.1 | Isoform 2 of Mini-chromosome maintenance complex-bin         | 2.857  | 3.062 | 1.096 |
| 594 | IPI00023064.1 | NADH dehydrogenase [ubiquinone] 1 alpha subcomplex a         | 2.233  | 1.979 | 0.765 |
| 595 | IPI00556640.1 | PSAP protein                                                 | 2.281  | 2.291 | 1.005 |
| 596 | IPI00019326.1 | Adrenodoxin, mitochondrial                                   | 2.843  | 1.772 | 0.554 |
| 597 | IPI01013095.1 | cDNA, FLJ79243, highly similar to Eukaryotic translation ini | 2.564  | 1.829 | 0.707 |
| 598 | IPI00893219.2 | LUC7-like                                                    | 2.395  | 2.655 | 1.109 |
| 599 | IPI00009464.1 | Isoform 1 of Exosome component 10                            | 2.320  | 1.863 | 0.829 |
| 600 | IPI01015801.1 | cDNA FLJ16138 fis, clone BRALZ2017531, highly similar to G   | 1.550  | 1.636 | 1.056 |
| 601 | IPI00719622.1 | 40S ribosomal protein S28                                    | 2.497  | 1.144 | 0.458 |
| 602 | IPI00012866.2 | RAC-alpha serine/threonine-protein kinase                    | 3.314  | 2.355 | 0.711 |
| 603 | IPI00940656.2 | ANP32A protein                                               | 2.559  | 2.043 | 0.798 |
| 604 | IPI01014610.1 | tRNA methyltransferase 11-2 homolog (S. cerevisiae)          | 2.243  | 1.697 | 0.720 |
| 605 | IPI01011099.1 | cDNA FLJ53046, highly similar to 26S proteasome non-ATPa     | 2.727  | 1.987 | 0.737 |
| 606 | IPI00909299.1 | cDNA FLJ51288, highly similar to Kinesin heavy chain         | 2.059  | 2.005 | 0.974 |
| 607 | IPI00011770.1 | NADH dehydrogenase [ubiquinone] 1 alpha subcomplex s         | 2.354  | 1.359 | 0.575 |
| 608 | IPI01010794.1 | cDNA FLJ61096, highly similar to THO complex subunit 2       | 2.589  | 2.183 | 1.121 |

|     |               |                                                             |       |       |       |
|-----|---------------|-------------------------------------------------------------|-------|-------|-------|
| 609 | IPI00553165.4 | Protein (Peptidylprolyl cis/trans isomerase) NIMA-interact  | 2.601 | 1.513 | 0.537 |
| 610 | IPI00019407.1 | Sterol-4-alpha-carboxylate 3-dehydrogenase, decarboxyla     | 2.093 | 1.727 | 0.787 |
| 611 | IPI00910487.1 | cDNA FLJ52569, highly similar to Collagen-binding protein   | 2.138 | 1.930 | 0.980 |
| 612 | IPI00967473.1 | DEK oncogene                                                | 2.817 | 2.494 | 0.863 |
| 613 | IPI01010979.1 | zinc finger CCCH-type containing 15                         | 3.031 | 2.044 | 0.768 |
| 614 | IPI00550037.3 | 28S ribosomal protein S15, mitochondrial                    | 2.172 | 1.506 | 0.693 |
| 615 | IPI00639819.1 | TAR DNA binding protein                                     | 2.500 | 2.116 | 0.805 |
| 616 | IPI00983383.1 | cDNA FLJ54904, highly similar to Homo sapiens dendritic c   | 2.542 | 1.920 | 0.755 |
| 617 | IPI00220871.4 | 60S ribosomal protein L37                                   | 3.575 | 2.284 | 0.700 |
| 618 | IPI00940152.1 | ataxin-10 isoform 2                                         | 1.994 | 2.241 | 1.056 |
| 619 | IPI00180128.4 | Isoform 2 of Basic leucine zipper and W2 domain-contain     | 2.787 | 1.715 | 0.615 |
| 620 | IPI00016676.1 | Mitochondrial import receptor subunit TOM20 homolog         | 2.694 | 1.775 | 0.861 |
| 621 | IPI00646917.1 | Cleavage and polyadenylation specificity factor subunit 5   | 2.989 | 2.276 | 0.762 |
| 622 | IPI01014783.1 | cDNA FLJ58533, highly similar to Leucyl-tRNA synthetase, cy | 2.830 | 1.974 | 0.691 |
| 623 | IPI00037448.3 | Glyoxylate reductase/hydroxypyruvate reductase              | 2.200 | 2.288 | 0.955 |
| 624 | IPI00184525.2 | Isoform 2 of Methylthioribose-1-phosphate isomerase         | 2.654 | 2.219 | 0.812 |
| 625 | IPI00007074.5 | Tyrosyl-tRNA synthetase, cytoplasmic                        | 2.226 | 1.571 | 0.684 |
| 626 | IPI01018318.1 | cDNA FLJ54744, highly similar to Scaffold attachment facto  | 4.256 | 3.239 | 0.761 |
| 627 | IPI01011782.1 | cDNA FLJ61430, highly similar to ATP-dependent RNA helic    | 3.549 | 2.477 | 0.698 |
| 628 | IPI00449201.2 | Isoform 2 of Ubiquitin-like-conjugating enzyme ATG3         | 1.877 | 1.866 | 1.004 |
| 629 | IPI00788781.1 | fatty acid binding protein 5 (psoriasis-associated)         | 4.128 | 2.098 | 0.488 |
| 630 | IPI00937239.2 | 40S ribosomal protein S21                                   | 1.875 | 1.002 | 0.546 |
| 631 | IPI00940890.1 | Isoform 3 of RNA-binding protein 4                          | 2.917 | 2.405 | 0.824 |
| 632 | IPI01015427.1 | cDNA FLJ58247, highly similar to 26S protease regulatory su | 2.919 | 1.830 | 0.627 |
| 633 | IPI00032957.1 | SUMO-conjugating enzyme UBC9                                | 3.267 | 2.100 | 0.643 |
| 634 | IPI00025086.4 | Cytochrome c oxidase subunit 5A, mitochondrial              | 3.883 | 2.117 | 0.545 |
| 635 | IPI00221325.3 | E3 SUMO-protein ligase RanBP2                               | 4.446 | 3.044 | 0.685 |
| 636 | IPI00472003.1 | Isoform 4 of BH3-interacting domain death agonist           | 3.018 | 4.338 | 0.843 |
| 637 | IPI00167572.4 | Protein FAM98B                                              | 2.057 | 2.368 | 1.184 |
| 638 | IPI00937682.1 | Opioid growth factor receptor                               | 2.520 | 2.275 | 0.901 |
| 639 | IPI00003927.5 | Peptidyl-prolyl cis-trans isomerase D                       | 2.491 | 2.630 | 1.056 |
| 640 | IPI00968128.1 | ribosomal protein L9                                        | 1.968 | 1.584 | 0.780 |
| 641 | IPI00216770.1 | Isoform 2 of 26S protease regulatory subunit 6B             | 1.890 | 1.884 | 0.997 |
| 642 | IPI00925570.1 | regulator of chromosome condensation 1                      | 2.007 | 1.969 | 0.981 |
| 643 | IPI01015278.1 | cDNA FLJ58314, highly similar to Mitogen-activated protein  | 2.838 | 2.159 | 0.761 |
| 644 | IPI00953925.1 | Aryl hydrocarbon receptor interacting protein               | 3.696 | 3.745 | 1.013 |
| 645 | IPI00966482.1 | cDNA FLJ36919 fis, clone BRACE2003987, highly similar to C  | 2.641 | 2.597 | 0.984 |
| 646 | IPI00979370.1 | K-RAS protein (Fragment)                                    | 2.248 | 1.704 | 0.758 |
| 647 | IPI00946099.1 | sorcin                                                      | 2.460 | 1.653 | 0.672 |
| 648 | IPI00980330.1 | RAP2A, member of RAS oncogene family                        | 2.108 | 1.703 | 0.808 |
| 649 | IPI00303207.3 | ATP-binding cassette sub-family E member 1                  | 2.586 | 1.565 | 0.555 |
| 650 | IPI00289819.5 | Cation-independent mannose-6-phosphate receptor             | 4.060 | 3.065 | 0.755 |
| 651 | IPI00010896.3 | Chloride intracellular channel protein 1                    | 3.893 | 2.847 | 0.731 |
| 652 | IPI00032900.1 | Bola-like protein 1                                         | 1.672 | 1.397 | 0.835 |
| 653 | IPI00306516.1 | Mitochondrial import inner membrane translocase subun       | 2.452 | 2.514 | 1.026 |
| 654 | IPI00792186.4 | ATP-binding cassette, sub-family F (GCN20), member 1        | 2.301 | 1.794 | 0.780 |
| 655 | IPI00909058.1 | cDNA FLJ54246, highly similar to Homo sapiens BRCA2 and     | 2.050 | 2.164 | 1.107 |

|     |               |                                                              |       |       |       |
|-----|---------------|--------------------------------------------------------------|-------|-------|-------|
| 656 | IPI01011924.1 | ubiquitin specific peptidase 7 (herpes virus-associated)     | 3.215 | 2.651 | 0.824 |
| 657 | IPI00470922.2 | Isoform 2 of N-alpha-acetyltransferase 50, NatE catalytic s  | 3.337 | 2.432 | 0.729 |
| 658 | IPI00977975.1 | chromosome 11 open reading frame 58                          | 2.303 | 1.720 | 0.747 |
| 659 | IPI00978083.1 | Uncharacterized protein                                      | 2.164 | 1.699 | 0.785 |
| 660 | IPI00014238.2 | Isoform Cytoplasmic of Lysyl-tRNA synthetase                 | 2.485 | 1.985 | 0.799 |
| 661 | IPI01008912.1 | NADH dehydrogenase (ubiquinone) Fe-S protein 8, 23kDa        | 2.285 | 1.636 | 0.716 |
| 662 | IPI00982639.1 | chromosome 11 open reading frame 31                          | 2.657 | 1.695 | 0.638 |
| 663 | IPI00967533.1 | transmembrane protein 33                                     | 4.675 | 3.615 | 0.773 |
| 664 | IPI00647084.2 | programmed cell death protein 4 isoform 3                    | 4.134 | 3.036 | 0.734 |
| 665 | IPI01014222.1 | damage-specific DNA binding protein 1, 127kDa                | 2.132 | 1.831 | 0.859 |
| 666 | IPI00917463.1 | Isoform 3 of Ancient ubiquitous protein 1                    | 3.145 | 2.560 | 0.814 |
| 667 | IPI00012197.1 | dCTP pyrophosphatase 1                                       | 2.486 | 1.875 | 0.754 |
| 668 | IPI00014230.1 | Complement component 1 Q subcomponent-binding prote          | 2.123 | 1.198 | 0.564 |
| 669 | IPI00410615.2 | Isoform 3 of Low molecular weight phosphotyrosine prote      | 2.945 | 2.160 | 0.734 |
| 670 | IPI00010414.4 | PDZ and LIM domain protein 1                                 | 2.268 | 2.842 | 1.253 |
| 671 | IPI00290142.5 | CTP synthase 1                                               | 2.521 | 2.076 | 0.824 |
| 672 | IPI00258833.1 | sorting nexin-6 isoform a                                    | 2.005 | 1.829 | 0.913 |
| 673 | IPI00646864.1 | signal sequence receptor, delta                              | 3.223 | 2.155 | 0.669 |
| 674 | IPI00783302.1 | Isoform 1 of Pentatricopeptide repeat-containing protein     | 2.715 | 1.697 | 0.625 |
| 675 | IPI00017672.4 | cDNA FLJ25678 fis, clone TST04067, highly similar to PURIN   | 2.141 | 1.724 | 0.805 |
| 676 | IPI00010270.1 | Ras-related C3 botulinum toxin substrate 2                   | 1.842 | 1.709 | 0.928 |
| 677 | IPI00218922.5 | Translocation protein SEC63 homolog                          | 1.813 | 2.331 | 1.286 |
| 678 | IPI00984586.1 | trypsin-3 isoform 4 preproprotein                            | 1.541 | 1.084 | 0.704 |
| 679 | IPI01012629.1 | aspartyl aminopeptidase                                      | 2.393 | 2.180 | 0.911 |
| 680 | IPI00642944.1 | Poly(A) binding protein, cytoplasmic 4 (Inducible form), iso | 2.871 | 2.563 | 0.892 |
| 681 | IPI00440719.2 | N(alpha)-acetyltransferase 10, NatA catalytic subunit        | 2.611 | 2.049 | 0.785 |
| 682 | IPI00973891.1 | NudC domain containing 2                                     | 2.523 | 1.967 | 0.780 |
| 683 | IPI00797679.1 | Inosine triphosphatase (Nucleoside triphosphate pyroph       | 2.546 | 1.718 | 0.675 |
| 684 | IPI00294495.5 | Ubiquitin-fold modifier-conjugating enzyme 1                 | 1.754 | 1.531 | 0.873 |
| 685 | IPI00303105.3 | Small ubiquitin-related modifier 1                           | 3.897 | 2.277 | 0.584 |
| 686 | IPI00028004.2 | Proteasome subunit beta type-3                               | 2.801 | 1.747 | 0.708 |
| 687 | IPI00909879.1 | cDNA FLJ50886, highly similar to Aconitate hydratase, mito   | 2.786 | 2.187 | 0.785 |
| 688 | IPI00000606.5 | Tetratricopeptide repeat protein 4                           | 2.051 | 2.048 | 0.998 |
| 689 | IPI00879792.1 | Cytochrome b5 reductase 3                                    | 2.312 | 2.607 | 1.128 |
| 690 | IPI00377080.1 | COP9 signalosome complex subunit 8 isoform 2                 | 2.156 | 1.576 | 0.731 |
| 691 | IPI00556611.1 | 39S ribosomal protein L22, mitochondrial isoform b           | 2.767 | 1.976 | 0.714 |
| 692 | IPI00448725.1 | RAB4B protein                                                | 1.865 | 3.320 | 1.780 |
| 693 | IPI00981273.2 | cDNA FLJ14161 fis, clone NT2RM2001803, highly similar to I   | 3.562 | 3.791 | 1.064 |
| 694 | IPI00001146.1 | U6 snRNA-associated Sm-like protein LSm6                     | 2.448 | 1.326 | 0.542 |
| 695 | IPI00645836.1 | esterase D                                                   | 2.445 | 2.476 | 1.013 |
| 696 | IPI00178047.7 | proline, glutamate and leucine rich protein 1                | 2.174 | 3.276 | 1.507 |
| 697 | IPI00925574.1 | COP9 constitutive photomorphogenic homolog subunit 6 (A      | 3.088 | 3.438 | 1.113 |
| 698 | IPI00073602.1 | Exosome complex component MTR3                               | 3.019 | 1.679 | 0.805 |
| 699 | IPI00879002.1 | Tubulin tyrosine ligase-like family, member 12               | 3.052 | 2.679 | 0.878 |
| 700 | IPI00181728.1 | Ribosome biogenesis protein BRX1 homolog                     | 3.432 | 2.270 | 0.661 |
| 701 | IPI00062866.4 | Isoform 1 of Zinc finger CCCH-type antiviral protein 1-like  | 2.590 | 2.770 | 1.070 |
| 702 | IPI00794082.2 | cDNA FLJ57650, highly similar to Bleomycin hydrolase         | 2.534 | 2.463 | 0.972 |

|     |               |                                                           |       |       |       |
|-----|---------------|-----------------------------------------------------------|-------|-------|-------|
| 703 | IPI00291922.2 | Proteasome subunit alpha type-5                           | 2.973 | 2.087 | 0.702 |
| 704 | IPI00015838.3 | Cell growth-regulating nucleolar protein                  | 2.101 | 2.243 | 1.067 |
| 705 | IPI01014863.1 | Acetyl-CoA acetyltransferase, cytosolic                   | 4.044 | 2.972 | 0.735 |
| 706 | IPI00162330.3 | 39S ribosomal protein L37, mitochondrial                  | 2.667 | 2.284 | 0.856 |
| 707 | IPI00022640.1 | Neurogranin                                               | 3.763 | 2.308 | 0.613 |
| 708 | IPI00976464.1 | Sjogren syndrome/scleroderma autoantigen 1                | 2.177 | 1.595 | 0.733 |
| 709 | IPI00014437.4 | Sjogren syndrome nuclear autoantigen 1                    | 2.575 | 1.689 | 0.656 |
| 710 | IPI00024821.1 | 26S proteasome non-ATPase regulatory subunit 14           | 2.690 | 2.618 | 0.973 |
| 711 | IPI00646978.4 | lysophospholipase II                                      | 2.039 | 1.463 | 0.718 |
| 712 | IPI00925853.1 | cDNA FLJ60586, highly similar to NADH-ubiquinone oxidore  | 5.404 | 4.810 | 1.117 |
| 713 | IPI00235412.7 | dynammin 1-like                                           | 2.466 | 1.987 | 0.806 |
| 714 | IPI00030243.1 | Isoform 1 of Proteasome activator complex subunit 3       | 3.658 | 1.704 | 0.466 |
| 715 | IPI00966744.1 | Ubiquitin carrier protein                                 | 2.630 | 1.922 | 0.731 |
| 716 | IPI00299155.5 | Proteasome subunit alpha type-4                           | 2.387 | 1.962 | 0.822 |
| 717 | IPI00794194.1 | developmentally regulated GTP binding protein 2           | 2.134 | 1.856 | 0.870 |
| 718 | IPI00016912.1 | Tetratricopeptide repeat protein 1                        | 6.247 | 6.968 | 1.115 |
| 719 | IPI00784936.1 | septin-9 isoform c                                        | 2.793 | 2.610 | 0.935 |
| 720 | IPI00294398.2 | Isoform 1 of Hydroxyacyl-coenzyme A dehydrogenase, mito   | 2.185 | 1.507 | 0.690 |
| 721 | IPI00000873.3 | Valyl-tRNA synthetase                                     | 2.085 | 2.211 | 1.060 |
| 722 | IPI00032827.1 | Pre-mRNA branch site protein p14                          | 3.887 | 2.770 | 0.712 |
| 723 | IPI00293434.2 | Signal recognition particle 14 kDa protein                | 2.967 | 2.050 | 0.691 |
| 724 | IPI00657698.2 | cDNA FLJ59884, highly similar to Secernin-1               | 1.915 | 2.157 | 1.126 |
| 725 | IPI00645380.1 | Isoform 2 of E3 ubiquitin-protein ligase CHIP             | 2.305 | 2.593 | 1.125 |
| 726 | IPI00643317.3 | high mobility group box 3                                 | 2.203 | 1.336 | 0.606 |
| 727 | IPI00448974.2 | NUP107 protein                                            | 2.710 | 1.857 | 0.685 |
| 728 | IPI00028414.3 | Glia maturation factor gamma                              | 2.044 | 1.554 | 0.760 |
| 729 | IPI00060715.1 | BTB/POZ domain-containing protein KCTD12                  | 2.609 | 2.939 | 1.006 |
| 730 | IPI00216057.6 | Sorbitol dehydrogenase                                    | 2.541 | 2.083 | 0.820 |
| 731 | IPI00939491.1 | Isoform 2 of CysteinyI-tRNA synthetase, cytoplasmic       | 2.690 | 2.003 | 0.786 |
| 732 | IPI00290460.3 | Eukaryotic translation initiation factor 3 subunit G      | 2.420 | 2.037 | 0.842 |
| 733 | IPI00896410.1 | Ribosomal protein L36a                                    | 5.359 | 2.556 | 0.477 |
| 734 | IPI00936931.2 | cDNA FLJ57553, highly similar to SPFH domain-containing p | 2.319 | 2.025 | 0.873 |
| 735 | IPI00412224.2 | WD repeat-containing protein 11                           | 1.928 | 2.150 | 1.115 |
| 736 | IPI00554626.3 | C-terminal-binding protein 1 isoform 2                    | 1.644 | 1.853 | 1.127 |
| 737 | IPI00922378.1 | cDNA FLJ55038, highly similar to Nicotinamide phosphorib  | 1.455 | 1.441 | 0.990 |
| 738 | IPI00639981.1 | Phosphofructokinase, platelet                             | 3.545 | 2.880 | 0.812 |
| 739 | IPI01010750.1 | DNA ligase (Fragment)                                     | 3.226 | 2.021 | 0.866 |
| 740 | IPI00792207.3 | aldehyde dehydrogenase, mitochondrial Isoform 2 precurs   | 2.414 | 2.194 | 0.909 |
| 741 | IPI00030320.4 | Probable ATP-dependent RNA helicase DDX6                  | 1.995 | 1.821 | 0.913 |
| 742 | IPI00009342.1 | Ras GTPase-activating-like protein IQGAP1                 | 2.655 | 2.012 | 0.758 |
| 743 | IPI00026964.2 | Cytochrome b-c1 complex subunit Rieske, mitochondrial     | 1.890 | 1.173 | 0.620 |
| 744 | IPI01010035.1 | cDNA FLJ52928, highly similar to COP9 signalosome comple  | 1.734 | 1.844 | 1.063 |
| 745 | IPI00218200.8 | B-cell receptor-associated protein 31                     | 3.167 | 2.529 | 0.798 |
| 746 | IPI01009610.1 | cDNA FLJ57998, highly similar to Homo sapiens myo-inosit  | 1.925 | 2.807 | 1.458 |
| 747 | IPI00642256.2 | Isoform 2 of F-actin-capping protein subunit beta         | 2.434 | 1.922 | 0.789 |
| 748 | IPI00399170.1 | Isoform 2 of Regulator of nonsense transcripts 1          | 4.314 | 2.970 | 0.689 |
| 749 | IPI00745613.2 | Exosome complex component RRP41                           | 2.900 | 2.337 | 0.806 |



|     |               |                                                             |       |       |       |
|-----|---------------|-------------------------------------------------------------|-------|-------|-------|
| 750 | IPI00027547.2 | Dermcidin                                                   | 1.686 | 0.837 | 0.496 |
| 751 | IPI00429689.3 | Serine/threonine-protein phosphatase 2A catalytic subun     | 3.300 | 2.694 | 0.817 |
| 752 | IPI00018691.1 | Isoform 1 of 28S ribosomal protein S18a, mitochondrial      | 2.826 | 2.264 | 0.801 |
| 753 | IPI00967112.1 | mitochondrial ribosomal protein S27                         | 2.119 | 1.786 | 0.843 |
| 754 | IPI00011726.1 | Isoform 1 of RNA 3'-terminal phosphate cyclase              | 2.371 | 1.781 | 0.751 |
| 755 | IPI00014458.1 | Protein SCO2 homolog, mitochondrial                         | 2.402 | 1.707 | 0.711 |
| 756 | IPI00006113.1 | DNA-directed RNA polymerase II subunit RPB9                 | 2.582 | 1.927 | 0.746 |
| 757 | IPI00031106.1 | Proteasome assembly chaperone 3                             | 6.824 | 4.055 | 0.594 |
| 758 | IPI00383046.3 | Carboxymethylenebutenolidase homolog                        | 2.838 | 1.788 | 0.690 |
| 759 | IPI00215777.1 | Isoform B of Phosphate carrier protein, mitochondrial       | 3.545 | 2.478 | 0.699 |
| 760 | IPI00946474.1 | NADH dehydrogenase (ubiquinone) 1 alpha subcomplex, 5       | 3.101 | 1.462 | 0.924 |
| 761 | IPI00030877.2 | 15 kDa selenoprotein isoform 1 precursor                    | 2.540 | 1.853 | 0.729 |
| 762 | IPI01012198.1 | tRNA methyltransferase 11 homolog                           | 2.098 | 2.159 | 1.029 |
| 763 | IPI00921488.1 | Isoform 4 of COP9 signalosome complex subunit 1             | 2.817 | 1.936 | 0.687 |
| 764 | IPI00000335.1 | Histidine triad nucleotide-binding protein 2, mitochondri   | 2.578 | 1.729 | 0.670 |
| 765 | IPI00922583.1 | phosphatidylinositol-4-phosphate 5-kinase type-1 alpha i    | 2.784 | 1.515 | 0.544 |
| 766 | IPI01012747.1 | aldehyde dehydrogenase 5 family, member A1                  | 2.159 | 1.826 | 0.846 |
| 767 | IPI00155054.3 | cDNA FLJ50635, highly similar to ATP-dependent RNA helic    | 2.616 | 1.702 | 0.651 |
| 768 | IPI00925071.1 | nucleoporin 205kDa                                          | 3.645 | 3.072 | 0.843 |
| 769 | IPI00375533.5 | Isoform 2 of NEDD8-activating enzyme E1 catalytic subunit   | 2.371 | 1.816 | 0.766 |
| 770 | IPI00793076.1 | general transcription factor IIA, 2, 12kDa                  | 2.122 | 1.153 | 0.543 |
| 771 | IPI00219005.3 | Peptidyl-prolyl cis-trans isomerase FKBP4                   | 2.143 | 1.773 | 0.827 |
| 772 | IPI00303318.2 | Protein FAM49B                                              | 2.272 | 3.090 | 1.360 |
| 773 | IPI00003217.3 | Proteasome subunit beta type-7                              | 3.059 | 1.995 | 0.652 |
| 774 | IPI00026970.4 | FACT complex subunit SPT16                                  | 4.823 | 3.009 | 0.624 |
| 775 | IPI00926917.1 | eukaryotic translation initiation factor 4 gamma, 1         | 3.165 | 2.438 | 0.770 |
| 776 | IPI00377233.1 | Isoform 2 of 39S ribosomal protein L11, mitochondrial       | 2.192 | 1.692 | 0.772 |
| 777 | IPI01011967.1 | cDNA FLJ54535, highly similar to Ribosomal protein S6 kina  | 2.600 | 1.925 | 0.740 |
| 778 | IPI00430781.1 | chromosome 8 open reading frame 82                          | 2.416 | 1.799 | 0.745 |
| 779 | IPI00220059.5 | NADH dehydrogenase [ubiquinone] 1 beta subcomplex su        | 3.058 | 2.374 | 0.777 |
| 780 | IPI00964692.1 | exportin 5                                                  | 2.475 | 2.114 | 0.854 |
| 781 | IPI01013481.1 | cDNA FLJ50601, highly similar to Glutathione synthetase     | 2.255 | 2.475 | 1.097 |
| 782 | IPI00966735.1 | 28 kDa protein                                              | 2.747 | 2.290 | 0.834 |
| 783 | IPI00966258.1 | ubiquitin carboxyl-terminal esterase L1 (ubiquitin thioles  | 2.146 | 1.764 | 0.822 |
| 784 | IPI00940901.1 | Isoform 2 of RRP12-like protein                             | 5.202 | 2.854 | 0.549 |
| 785 | IPI00093057.6 | Coproporphyrinogen-III oxidase, mitochondrial               | 2.577 | 2.605 | 1.011 |
| 786 | IPI00031526.3 | chromosome 19 open reading frame 43                         | 1.864 | 1.295 | 0.695 |
| 787 | IPI00908327.1 | Isoform 2 of RING finger protein 114                        | 2.511 | 2.192 | 0.873 |
| 788 | IPI01013918.1 | mannose-6-phosphate receptor (cation dependent)             | 2.134 | 1.635 | 0.766 |
| 789 | IPI00397700.5 | Isoform 2 of PHD finger protein 6                           | 3.123 | 2.048 | 0.656 |
| 790 | IPI00916535.1 | prolyl 4-hydroxylase subunit alpha-1 isoform 3 precursor    | 2.800 | 2.054 | 0.734 |
| 791 | IPI00909399.2 | xaa-Pro dipeptidase isoform 3                               | 2.437 | 2.567 | 1.053 |
| 792 | IPI01011453.1 | SUMO-activating enzyme subunit 1 isoform c                  | 2.662 | 2.479 | 0.931 |
| 793 | IPI00513841.1 | Nicastrin                                                   | 2.749 | 2.277 | 0.828 |
| 794 | IPI00022648.2 | Eukaryotic translation initiation factor 5                  | 3.182 | 3.422 | 1.075 |
| 795 | IPI00014263.1 | Isoform Long of Eukaryotic translation initiation factor 4H | 2.299 | 1.646 | 0.716 |
| 796 | IPI00719256.2 | SART3 protein                                               | 3.351 | 3.069 | 0.916 |

|     |               |                                                            |       |       |       |
|-----|---------------|------------------------------------------------------------|-------|-------|-------|
| 797 | IPI00292020.3 | Spermidine synthase                                        | 2.230 | 2.343 | 1.051 |
| 798 | IPI00514522.1 | chromosome 1 open reading frame 123                        | 2.005 | 1.453 | 0.725 |
| 799 | IPI00947116.1 | dihydrofolate reductase-like 1                             | 2.313 | 1.752 | 0.758 |
| 800 | IPI00966243.1 | cytochrome b5 type B (outer mitochondrial membrane)        | 2.299 | 1.775 | 0.772 |
| 801 | IPI00894110.1 | polyribonucleotide nucleotidyltransferase 1                | 2.189 | 1.886 | 0.861 |
| 802 | IPI00514669.1 | SH3 domain binding glutamic acid-rich protein like 3       | 1.780 | 1.033 | 0.581 |
| 803 | IPI00003326.4 | ADP-ribosylation factor-like protein 2                     | 2.511 | 1.969 | 0.784 |
| 804 | IPI00909691.1 | cDNA FLJ50174, highly similar to Homo sapiens SNARE prot   | 3.220 | 2.524 | 0.784 |
| 805 | IPI00980207.1 | signal recognition particle 19 kDa protein isoform 3       | 3.782 | 2.620 | 0.693 |
| 806 | IPI00940222.2 | Isoform 3 of A-kinase anchor protein 12                    | 4.888 | 3.044 | 0.623 |
| 807 | IPI00182289.6 | 40S ribosomal protein S29                                  | 2.108 | 1.108 | 0.525 |
| 808 | IPI00939707.1 | clustered mitochondria (cluA/CLU1) homolog                 | 2.519 | 2.489 | 0.988 |
| 809 | IPI00005675.3 | NF-kappa-B-repressing factor                               | 1.993 | 2.072 | 1.040 |
| 810 | IPI00396329.1 | Ribosome production factor 2 homolog                       | 2.990 | 2.136 | 0.714 |
| 811 | IPI00299214.7 | Thymidine kinase, cytosolic                                | 4.849 | 4.582 | 0.945 |
| 812 | IPI00023728.1 | Gamma-glutamyl hydrolase                                   | 2.484 | 2.858 | 1.150 |
| 813 | IPI00643709.1 | Solute carrier family 16, member 1                         | 3.415 | 2.668 | 0.781 |
| 814 | IPI00917193.1 | hexokinase 2                                               | 2.090 | 1.811 | 0.867 |
| 815 | IPI00943181.1 | proteasome (prosome, macropain) activator subunit 2 (PA    | 2.981 | 2.827 | 0.948 |
| 816 | IPI00013180.2 | Protein BUD31 homolog                                      | 2.944 | 2.154 | 0.732 |
| 817 | IPI00892533.1 | chromosome 7 open reading frame 50                         | 2.682 | 1.828 | 0.681 |
| 818 | IPI00005050.1 | 28S ribosomal protein S14, mitochondrial                   |       |       | 0.343 |
| 819 | IPI00978325.1 | cathepsin C                                                | 2.305 | 1.492 | 0.647 |
| 820 | IPI00452731.6 | NADH dehydrogenase [ubiquinone] 1 alpha subcomplex s       | 3.039 | 1.675 | 0.551 |
| 821 | IPI00641181.5 | MARCKS-related protein                                     | 3.731 | 3.671 | 0.984 |
| 822 | IPI00006754.1 | DDB1- and CUL4-associated factor 7                         | 2.423 | 1.968 | 0.812 |
| 823 | IPI01015967.1 | DnaJ (Hsp40) homolog, subfamily A, member 1                | 2.114 | 1.915 | 0.906 |
| 824 | IPI00002824.7 | Cysteine and glycine-rich protein 2                        | 2.587 | 1.514 | 0.585 |
| 825 | IPI00021266.1 | 60S ribosomal protein L23a                                 | 3.833 | 1.775 | 0.463 |
| 826 | IPI00964725.1 | succinate dehydrogenase complex, subunit A, flavoprotein   | 0.869 |       |       |
| 827 | IPI00967916.1 | cytochrome c oxidase subunit VIIc                          | 2.410 | 1.109 | 0.460 |
| 828 | IPI00219351.3 | Isoform 3 of 28S ribosomal protein S11, mitochondrial      | 3.212 | 2.152 | 0.670 |
| 829 | IPI00604652.1 | NEDD8-activating enzyme E1 regulatory subunit isoform c    | 2.773 | 1.721 | 0.621 |
| 830 | IPI00514049.1 | Cytidine monophosphate (UMP-CMP) kinase 1, cytosolic       | 3.965 | 2.380 | 0.600 |
| 831 | IPI00016339.4 | Ras-related protein Rab-5C                                 | 1.869 | 0.801 | 0.429 |
| 832 | IPI00847896.1 | Similar to Glutamate-rich WD repeat-containing protein 1   | 7.164 | 5.378 | 0.751 |
| 833 | IPI00217563.4 | Isoform Beta-1A of Integrin beta-1                         | 3.743 | 3.076 | 0.822 |
| 834 | IPI01009997.1 | cDNA FLJ51981, highly similar to Histone deacetylase 1     | 2.711 | 1.364 | 0.503 |
| 835 | IPI00032533.3 | WD repeat-containing protein 18                            | 2.950 | 2.088 | 0.708 |
| 836 | IPI01018037.1 | replication factor C subunit 5 isoform 4                   | 2.413 | 2.617 | 1.084 |
| 837 | IPI00023530.7 | Cyclin-dependent kinase 5                                  | 2.616 | 2.035 | 0.778 |
| 838 | IPI00844040.2 | cDNA FLJ59759, highly similar to Protein SET               | 3.080 | 2.531 | 0.821 |
| 839 | IPI00965548.1 | thyroid hormone receptor interactor 13                     | 1.950 | 2.213 | 1.135 |
| 840 | IPI01015295.1 | cDNA FLJ30049 fis, clone ADRGL1000033, highly similar to 2 | 2.738 | 2.641 | 0.965 |
| 841 | IPI00745105.1 | chromosome 16 open reading frame 13                        | 2.094 | 1.559 | 0.745 |
| 842 | IPI00964335.1 | eukaryotic translation termination factor 1                | 3.823 | 4.749 | 1.242 |
| 843 | IPI00641266.4 | calpain-2 catalytic subunit isoform 2                      | 2.380 | 2.177 | 0.915 |

|     |               |                                                                         |       |       |       |
|-----|---------------|-------------------------------------------------------------------------|-------|-------|-------|
| 844 | IPI00902463.1 | cDNA FLJ46898 fis, clone UTERU3022168, highly similar to Protein FAM62A |       |       | 0.759 |
| 845 | IPI00916207.1 | 3-hydroxyisobutyryl-CoA hydrolase                                       | 2.806 | 2.330 | 0.830 |
| 846 | IPI00854677.1 | fused in sarcoma                                                        | 2.574 | 2.182 | 0.848 |
| 847 | IPI00966135.1 | histidine triad nucleotide binding protein 1                            | 3.201 | 2.255 | 0.704 |
| 848 | IPI00979071.1 | tumor protein, translationally-controlled 1                             | 2.653 | 1.824 | 0.687 |
| 849 | IPI00797616.2 | Isoform 3 of BRCA1-associated ATM activator 1                           | 3.946 | 2.358 | 0.598 |
| 850 | IPI00908614.1 | cDNA FLJ51287, highly similar to WD repeat protein 39                   | 2.637 | 1.951 | 0.740 |
| 851 | IPI00798211.1 | tubulin folding cofactor B                                              | 2.433 | 1.925 | 0.791 |
| 852 | IPI00185146.5 | Importin-9                                                              | 2.664 | 0.929 | 0.349 |
| 853 | IPI00008557.6 | Insulin-like growth factor 2 mRNA-binding protein 1                     | 2.263 | 0.748 | 0.330 |
| 854 | IPI00980519.1 | Conserved hypothetical protein                                          | 2.025 | 1.969 | 0.972 |
| 855 | IPI00927827.1 | replication factor C (activator 1) 4, 37kDa                             | 2.698 | 2.152 | 0.798 |
| 856 | IPI00917166.1 | dynactin 1                                                              |       |       | 0.397 |
| 857 | IPI00980429.1 | chloride channel, nucleotide-sensitive, 1A                              | 2.701 | 2.561 | 0.948 |
| 858 | IPI00791490.1 | pyridoxal (pyridoxine, vitamin B6) kinase                               | 4.426 | 4.951 | 1.119 |
| 859 | IPI00641815.1 | Isoform 2 of TIP41-like protein                                         | 3.098 | 2.525 | 0.815 |
| 860 | IPI00005969.3 | F-actin-capping protein subunit alpha-1                                 | 3.799 | 3.596 | 0.946 |
| 861 | IPI00443657.2 | cold inducible RNA binding protein                                      | 3.701 | 2.239 | 0.605 |
| 862 | IPI00024911.1 | Endoplasmic reticulum resident protein 29                               | 2.356 | 1.632 | 0.693 |
| 863 | IPI00964348.1 | DTW domain containing 2                                                 | 3.410 | 5.144 | 1.509 |
| 864 | IPI00848298.1 | Isoform 2 of Apolipoprotein A-I-binding protein                         | 2.322 | 1.784 | 0.768 |
| 865 | IPI00925058.1 | Ribosomal protein L15                                                   | 2.993 | 2.573 | 0.860 |
| 866 | IPI00410714.5 | Hemoglobin subunit alpha                                                | 2.568 | 1.389 | 0.541 |
| 867 | IPI00917535.1 | mitochondrial ribosomal protein L30                                     | 2.769 | 1.834 | 0.662 |
| 868 | IPI01015489.1 | cDNA FLJ60345, highly similar to Protein transport protein 5            | 2.280 | 1.720 | 0.755 |
| 869 | IPI00174852.4 | Mediator of RNA polymerase II transcription subunit 20                  | 2.548 | 1.985 | 0.779 |
| 870 | IPI00012315.2 | Nucleoside diphosphate kinase 3                                         | 1.893 | 1.639 | 0.866 |
| 871 | IPI01012187.1 | cDNA, FLJ79426, highly similar to Serine/threonine-protein              | 3.187 | 4.229 | 1.327 |
| 872 | IPI00747810.3 | fascin homolog 1, actin-bundling protein (Strongylocentrotus            | 4.249 | 6.229 | 1.466 |
| 873 | IPI00924813.1 | Similar to Ribosomal protein L37a                                       | 3.527 | 2.034 | 0.577 |
| 874 | IPI00025178.3 | Pre-mRNA-splicing factor SPF27                                          | 3.303 | 1.948 | 0.590 |
| 875 | IPI00030929.4 | myosin regulatory light polypeptide 9 isoform b                         | 2.667 | 1.790 | 0.671 |
| 876 | IPI00029114.1 | Peptidyl-tRNA hydrolase ICT1, mitochondrial                             | 2.846 | 1.963 | 0.690 |
| 877 | IPI00922290.1 | cDNA FLJ53094, highly similar to Receptor expression-enhancer           | 3.823 | 2.661 | 0.696 |
| 878 | IPI00018203.1 | Isoform SRP55-2 of Serine/arginine-rich splicing factor 6               | 2.375 | 1.707 | 0.719 |
| 879 | IPI00016532.4 | chromosome 4 open reading frame 27                                      |       |       | 0.927 |
| 880 | IPI00844002.1 | LYST-interacting protein LIP5 (Fragment)                                | 3.452 | 3.185 | 0.923 |
| 881 | IPI00026496.3 | Nucleoplasm-in-3                                                        | 2.001 | 1.537 | 0.768 |
| 882 | IPI00419797.5 | signal recognition particle 9kDa                                        | 1.806 | 0.879 | 0.487 |
| 883 | IPI00029239.2 | Isoform 2 of L-2-hydroxyglutarate dehydrogenase, mitochon               | 4.814 | 4.519 | 0.939 |
| 884 | IPI00917449.1 | gamma-glutamylcyclotransferase                                          | 2.296 | 1.721 | 0.750 |
| 885 | IPI00910220.1 | cDNA FLJ60230, highly similar to Arsenical pump-driving AT              | 3.281 | 2.688 | 0.819 |
| 886 | IPI00981356.1 | 3-hydroxyacyl-CoA dehydratase 3-like isoform 3, partial                 | 4.172 | 2.903 | 0.696 |
| 887 | IPI00868858.1 | Isoform 3 of MYC-induced nuclear antigen                                | 2.429 | 2.772 | 1.141 |
| 888 | IPI00925203.1 | glutaminyl-tRNA synthetase                                              |       |       | 2.922 |
| 889 | IPI00892788.1 | high density lipoprotein binding protein                                | 7.226 | 2.066 | 0.286 |
| 890 | IPI01015780.1 | cDNA FLJ57449, highly similar to Notchless homolog 1                    | 1.859 | 2.084 | 1.121 |

|     |               |                                                                         |       |       |       |
|-----|---------------|-------------------------------------------------------------------------|-------|-------|-------|
| 891 | IPI00909038.1 | cDNA FLJ58068, highly similar to Seryl-tRNA synthetase, mi              | 1.866 | 2.015 | 1.080 |
| 892 | IPI00219783.7 | Ubiquitin-conjugating enzyme E2 G1                                      | 2.591 | 2.192 | 0.846 |
| 893 | IPI00925737.1 | phosphoserine phosphatase                                               | 2.759 | 2.181 | 0.791 |
| 894 | IPI00100984.4 | Isoform 1 of HEAT repeat-containing protein 3                           | 2.466 | 2.494 | 1.011 |
| 895 | IPI00004454.3 | Isoform 1 of Dolichol-phosphate mannosyltransferase su                  | 2.544 | 2.135 | 0.839 |
| 896 | IPI00915874.1 | partner of NOB1 homolog ( <i>S. cerevisiae</i> )                        | 3.406 | 0.889 | 0.261 |
| 897 | IPI00006379.1 | Nucleolar protein 58                                                    | 2.835 | 0.970 | 0.342 |
| 898 | IPI00184854.1 | FK506 binding protein 10, 65 kDa                                        | 2.422 | 2.057 | 0.849 |
| 899 | IPI00101734.5 | family with sequence similarity 105, member B                           | 2.016 | 1.417 | 0.703 |
| 900 | IPI00186338.1 | barrier-to-autointegration factor-like                                  | 1.924 | 0.551 | 0.287 |
| 901 | IPI00926139.1 | mitochondrial ribosomal protein S25                                     | 4.682 | 3.599 | 0.769 |
| 902 | IPI00409639.1 | Isoform 4 of Methyltransferase-like protein 13                          | 1.656 | 1.871 | 1.130 |
| 903 | IPI00910420.1 | Isoform 3 of Alpha-aminoadipic semialdehyde dehydroge                   | 1.686 | 1.962 | 1.164 |
| 904 | IPI00924740.1 | programmed cell death 6 interacting protein                             | 1.860 | 1.837 | 0.988 |
| 905 | IPI00301051.3 | Isoform 1 of NHL repeat-containing protein 2                            | 3.799 | 2.256 | 0.594 |
| 906 | IPI00335589.5 | RNA methyltransferase-like protein 1                                    | 1.915 | 2.480 | 1.295 |
| 907 | IPI00032849.2 | Nucleolar protein 16                                                    | 1.942 | 1.526 | 0.785 |
| 908 | IPI00032903.3 | Peptidyl-tRNA hydrolase 2, mitochondrial                                | 3.312 | 3.700 | 1.117 |
| 909 | IPI00552190.1 | Proteasome (Prosome, macropain) 26S subunit, non-ATPas                  | 2.192 | 1.287 | 0.587 |
| 910 | IPI00940264.1 | Galactokinase                                                           | 2.557 | 3.010 | 1.177 |
| 911 | IPI00218112.1 | Isoform Short of Glutaryl-CoA dehydrogenase, mitochondr                 | 2.354 | 1.449 | 0.616 |
| 912 | IPI00983446.1 | UV radiation resistance associated                                      | 4.931 | 1.856 | 0.376 |
| 913 | IPI00061525.3 | Glucosamine 6-phosphate N-acetyltransferase                             | 2.142 | 1.885 | 0.880 |
| 914 | IPI00017704.3 | Coactosin-like protein                                                  | 3.031 | 1.794 | 0.592 |
| 915 | IPI00792829.1 | cDNA FLJ57094, highly similar to Probable ATP-dependent t               | 2.587 | 2.343 | 0.906 |
| 916 | IPI00926756.1 | Isoform 4 of TBC1 domain family member 4                                | 3.090 | 2.892 | 0.936 |
| 917 | IPI00910540.1 | cDNA FLJ51496, highly similar to Tyrosine-protein kinase C              | 1.915 | 2.219 | 1.159 |
| 918 | IPI00922322.1 | cDNA FLJ54129, highly similar to Nucleosome assembly pro                | 3.344 | 2.988 | 0.894 |
| 919 | IPI00940293.5 | cDNA FLJ56433, highly similar to Collagen alpha-2(IV) chai              | 2.944 | 1.794 | 0.609 |
| 920 | IPI01011794.1 | cDNA FLJ55643, highly similar to SEC23-interacting protein              | 1.859 | 1.320 | 0.710 |
| 921 | IPI00965185.1 | aminoacyl tRNA synthetase complex-interacting multifunc                 | 2.288 | 3.295 | 1.440 |
| 922 | IPI00395779.4 | chromosome 20 open reading frame 27                                     | 2.534 | 1.686 | 0.666 |
| 923 | IPI01015329.1 | cDNA FLJ52203, highly similar to 3'(2'),5'-bisphosphate nuc             | 3.475 | 3.103 | 0.893 |
| 924 | IPI00976190.1 | splicing factor 3b, subunit 2, 145kDa                                   | 4.347 | 3.358 | 0.772 |
| 925 | IPI00023542.6 | Transmembrane emp24 domain-containing protein 9                         | 1.739 | 1.681 | 0.967 |
| 926 | IPI01014928.1 | cDNA FLJ55328, highly similar to Homo sapiens BPY2 intera               | 3.894 | 2.818 | 0.724 |
| 927 | IPI00845493.1 | Brain type mu-glutathione S-transferase                                 | 4.100 | 3.005 | 0.733 |
| 928 | IPI00219065.2 | Isoform 5 of Glycogen debranching enzyme                                | 3.575 | 2.946 | 0.824 |
| 929 | IPI00979951.1 | proteasome (prosome, macropain) 26S subunit, ATPase, 3                  | 1.682 | 1.423 | 0.846 |
| 930 | IPI00549993.3 | Isoform 1 of Protein FAM188A                                            | 2.963 | 3.028 | 1.022 |
| 931 | IPI00791680.1 | cortactin                                                               | 2.526 | 2.019 | 0.799 |
| 932 | IPI01009790.1 | cDNA, FLJ79293, highly similar to WD repeat protein 71                  | 2.719 | 2.069 | 0.761 |
| 933 | IPI00946316.1 | karyopherin alpha 4 (importin alpha 3)                                  | 2.852 | 1.685 | 0.591 |
| 934 | IPI01014354.1 | cDNA FLJ54039, highly similar to Protein arginine N-methyltransferase 5 |       |       | 0.301 |
| 935 | IPI00910350.1 | cDNA FLJ52068, highly similar to Microtubule-associated p               | 2.320 | 1.855 | 0.799 |
| 936 | IPI00384155.1 | Full-length cDNA clone CSODI002YH20 of Placenta of Homo                 | 2.855 | 3.138 | 1.099 |
| 937 | IPI00981694.1 | ATX1 antioxidant protein 1 homolog (yeast)                              | 2.160 | 1.436 | 0.665 |

|     |               |                                                              |       |       |       |
|-----|---------------|--------------------------------------------------------------|-------|-------|-------|
| 938 | IPI00946674.1 | aldo-keto reductase family 7, member A2 (aflatoxin aldehy    | 8.035 | 7.719 | 0.961 |
| 939 | IPI00001655.1 | chromosome 16 open reading frame 80                          | 2.139 | 1.582 | 0.740 |
| 940 | IPI00654793.2 | NAD kinase domain containing 1                               | 6.247 | 3.579 | 0.573 |
| 941 | IPI01015376.1 | ATP synthase gamma chain                                     | 1.992 | 1.458 | 0.732 |
| 942 | IPI00002214.1 | Importin subunit alpha-2                                     | 3.253 | 2.384 | 0.733 |
| 943 | IPI00908375.1 | cDNA FLJ52821, highly similar to Protein transport protein 5 | 3.052 | 1.676 | 0.549 |
| 944 | IPI00978272.1 | methylcrotonoyl-CoA carboxylase beta chain, mitochondria     | 3.035 | 1.741 | 0.574 |
| 945 | IPI00945912.1 | cDNA FLJ59963, highly similar to Homo sapiens multiple s     | 2.105 | 2.442 | 1.160 |
| 946 | IPI00927809.1 | DEAH (Asp-Glu-Ala-His) box polypeptide 30                    | 3.310 | 2.757 | 0.833 |
| 947 | IPI00927458.1 | ribosomal protein L32                                        | 4.089 | 3.120 | 0.763 |
| 948 | IPI00183603.3 | Oligosaccharyltransferase complex subunit OSTC               | 8.362 | 4.496 | 0.538 |
| 949 | IPI00894139.1 | golgi to ER traffic protein 4 homolog (S. cerevisiae)        | 5.418 | 5.435 | 1.003 |
| 950 | IPI00878039.2 | coiled-coil domain containing 117                            | 2.228 | 2.479 | 1.112 |
| 951 | IPI00795057.1 | mitochondrial ribosomal protein S28                          | 2.925 | 2.252 | 0.770 |
| 952 | IPI00641692.3 | Ribonuclease P                                               | 3.031 | 1.810 | 0.597 |
| 953 | IPI00642048.2 | GDP-mannose 4,6-dehydratase                                  | 3.094 | 2.520 | 0.815 |
| 954 | IPI00334282.2 | Protein FAM3C                                                |       |       | 1.020 |
| 955 | IPI01008950.1 | Isoform 4 of UDP-N-acetylglucosamine--peptide N-acetylgl     | 2.168 | 1.951 | 0.900 |
| 956 | IPI00885131.1 | Isoform 3 of tRNA (adenine-N(1)-)-methyltransferase non-     | 2.616 | 1.633 | 0.624 |
| 957 | IPI00903191.1 | Eukaryotic translation initiation factor 3, subunit D        | 2.972 | 2.215 | 0.745 |
| 958 | IPI00886797.1 | Isoform 2 of 2',5'-phosphodiesterase 12                      | 2.582 | 2.133 | 0.826 |
| 959 | IPI01015636.1 | pogo transposable element with ZNF domain                    | 3.742 | 3.187 | 0.852 |
| 960 | IPI00871780.1 | RNA-binding protein 12B                                      | 3.431 | 3.040 | 0.886 |
| 961 | IPI00908741.1 | FAD-dependent oxidoreductase domain containing 1             | 1.919 | 2.585 | 1.347 |
| 962 | IPI00893867.1 | hydroxyacyl-CoA dehydrogenase/3-ketoacyl-CoA thiolase/e      | 1.488 | 1.894 | 1.273 |
| 963 | IPI00940816.2 | Isoform 3 of Rho guanine nucleotide exchange factor 2        | 2.306 | 1.978 | 0.858 |
| 964 | IPI00007019.1 | Peptidyl-prolyl cis-trans isomerase-like 1                   | 2.867 | 1.869 | 0.652 |
| 965 | IPI00945733.1 | karyopherin alpha 1 (importin alpha 5)                       | 4.379 | 5.617 | 1.283 |
| 966 | IPI00399089.4 | LDLR chaperone MESD                                          | 1.868 | 1.485 | 0.795 |
| 967 | IPI01014449.1 | chromobox homolog 1                                          | 2.312 | 1.698 | 0.734 |
| 968 | IPI00292894.5 | Pre-rRNA-processing protein TSR1 homolog                     | 1.797 | 1.876 | 1.044 |
| 969 | IPI00008436.4 | DNA polymerase epsilon subunit 4                             | 2.749 | 2.284 | 0.831 |
| 970 | IPI00981292.1 | cDNA FLJ53391, highly similar to ATP-binding cassette sub    | 4.960 | 3.100 | 0.625 |
| 971 | IPI00220835.7 | Protein transport protein Sec61 subunit beta                 | 5.362 | 3.242 | 0.605 |
| 972 | IPI00061531.4 | 39S ribosomal protein L53, mitochondrial                     | 3.948 | 2.101 | 0.532 |
| 973 | IPI00297626.4 | Syntaxin-binding protein 3                                   | 2.726 | 1.236 | 0.453 |
| 974 | IPI01014726.1 | cDNA, FLJ79305, highly similar to Calponin-1                 | 2.413 | 1.579 | 0.654 |
| 975 | IPI00024284.6 | Basement membrane-specific heparan sulfate proteoglyc        | 2.833 | 2.348 | 0.829 |
| 976 | IPI00329373.3 | Protein QIL1                                                 | 1.913 | 0.926 | 0.484 |
| 977 | IPI00015833.1 | Coiled-coil-helix-coiled-coil-helix domain-containing prot   | 2.578 | 1.907 | 0.740 |
| 978 | IPI00874145.2 | dyskeratosis congenita 1, dyskerin                           | 2.384 | 1.598 | 0.670 |
| 979 | IPI00788157.1 | Isoform 2 of 5'-3' exoribonuclease 2                         | 2.102 | 2.014 | 0.958 |
| 980 | IPI00306290.5 | Exportin-T                                                   | 1.257 | 0.808 | 0.643 |
| 981 | IPI00783001.1 | Isoform 1 of Probable methyltransferase-like protein 15      | 2.824 | 2.151 | 0.762 |
| 982 | IPI00477853.2 | zinc finger protein 235                                      | 3.082 | 2.182 | 0.708 |
| 983 | IPI00926599.1 | glycerol-3-phosphate dehydrogenase 1-like                    | 2.512 | 2.391 | 0.951 |
| 984 | IPI00908410.1 | cDNA FLJ56566, highly similar to Small glutamine-rich tetra  | 1.720 | 1.936 | 1.126 |

|      |               |                                                                                |       |       |       |
|------|---------------|--------------------------------------------------------------------------------|-------|-------|-------|
| 985  | IPI00032881.2 | 28S ribosomal protein S23, mitochondrial                                       | 2.074 | 1.587 | 0.765 |
| 986  | IPI00794240.1 | mitochondrial ribosomal protein L39                                            | 2.990 | 2.768 | 0.926 |
| 987  | IPI00966215.1 | TROVE domain family, member 2                                                  | 2.401 | 1.678 | 0.699 |
| 988  | IPI00868803.2 | Similar to Survival of motor neuron 2, centromeric isoform                     | 2.784 | 3.119 | 1.120 |
| 989  | IPI00985284.1 | La ribonucleoprotein domain family, member 1                                   | 2.129 | 1.816 | 0.853 |
| 990  | IPI01015748.1 | cDNA FLJ54999, highly similar to Mitochondrial-processing                      | 1.620 | 1.476 | 0.911 |
| 991  | IPI00845477.1 | Isoform 2 of Alpha-ketoglutarate-dependent dioxygenase                         | 2.884 | 2.061 | 0.715 |
| 992  | IPI00062882.4 | Cytoplasmic tRNA 2-thiolation protein 1                                        | 2.931 | 2.506 | 0.855 |
| 993  | IPI00941385.2 | Isoform 3 of Ubiquitin carboxyl-terminal hydrolase 10                          | 2.074 | 1.522 | 0.734 |
| 994  | IPI01011431.1 | cDNA FLJ60167, highly similar to Cytosolic acyl coenzyme A thioester hydrolase |       |       | 0.666 |
| 995  | IPI01009918.1 | Protease serine 1                                                              | 1.671 | 1.127 | 0.674 |
| 996  | IPI00642982.1 | LONP1 protein                                                                  | 3.097 | 2.134 | 0.689 |
| 997  | IPI00647368.1 | isocitrate dehydrogenase 3 (NAD+) gamma                                        | 2.886 | 2.075 | 0.719 |
| 998  | IPI00446669.1 | Isoform 2 of Multiple myeloma tumor-associated protein                         | 2.754 | 3.241 | 1.177 |
| 999  | IPI00398758.1 | Isoform 2 of Enoyl-CoA delta isomerase 1, mitochondrial                        | 2.832 | 2.088 | 0.737 |
| 1000 | IPI01015385.1 | Isocitrate dehydrogenase                                                       | 8.725 | 4.943 | 0.566 |
| 1001 | IPI00797738.1 | Cytochrome c oxidase subunit 6B1                                               | 2.063 | 1.310 | 0.635 |
| 1002 | IPI00946017.1 | ubiquitin specific peptidase 9, X-linked                                       | 3.737 | 2.796 | 0.748 |
| 1003 | IPI00030968.4 | chromosome 9 open reading frame 142                                            | 2.547 | 1.776 | 0.697 |
| 1004 | IPI01013430.1 | Selenophosphate synthetase 1 +E9a variant                                      | 4.037 | 3.503 | 0.868 |
| 1005 | IPI00107339.4 | Isoform 1 of Guanine nucleotide-binding protein subunit                        | 2.983 | 3.335 | 1.118 |
| 1006 | IPI00967384.2 | translocase of inner mitochondrial membrane 8 homolog                          | 1.961 | 0.883 | 0.450 |
| 1007 | IPI00644506.1 | cDNA FLJ58756, highly similar to Nuclear pore complex pro                      | 2.598 | 2.234 | 0.860 |
| 1008 | IPI00328298.6 | Isoform 2 of Structural maintenance of chromosomes prot                        | 3.847 | 2.616 | 0.680 |
| 1009 | IPI00514902.1 | Ubiquitin protein ligase E3 component n-recogin 4                              | 2.907 | 2.482 | 0.854 |
| 1010 | IPI00018331.3 | SNARE-associated protein Snapin                                                | 3.185 | 2.799 | 0.879 |
| 1011 | IPI00975492.1 | pyruvate dehydrogenase complex, component X                                    | 1.710 | 1.605 | 0.939 |
| 1012 | IPI00880148.1 | lectin, galactoside-binding, soluble, 1                                        | 2.954 | 1.842 | 0.624 |
| 1013 | IPI00878100.2 | GTP binding protein 1                                                          | 2.220 | 1.955 | 0.881 |
| 1014 | IPI00221089.5 | 40S ribosomal protein S13                                                      | 2.269 | 2.011 | 0.886 |
| 1015 | IPI00793395.1 | cDNA FLJ37679 fis, clone BRHIP2012922, highly similar to Co                    | 2.913 | 2.314 | 0.794 |
| 1016 | IPI00291755.6 | Isoform 1 of Nuclear pore membrane glycoprotein 210                            | 3.019 | 2.519 | 0.834 |
| 1017 | IPI00974419.1 | minichromosome maintenance complex component 4                                 | 1.937 | 2.194 | 1.132 |
| 1018 | IPI00025285.3 | V-type proton ATPase subunit G 1                                               | 3.081 | 1.949 | 0.633 |
| 1019 | IPI01011252.2 | phosphatidylinositol transfer protein, alpha                                   | 2.155 | 3.220 | 1.494 |
| 1020 | IPI00893025.1 | mutS homolog 6 (E. coli)                                                       | 4.563 | 3.178 | 0.696 |
| 1021 | IPI00916549.1 | budding uninhibited by benzimidazoles 1 homolog (yeast)                        | 1.859 | 1.930 | 1.038 |
| 1022 | IPI00947340.1 | FKBP8 isoform 1                                                                | 2.999 | 1.948 | 0.650 |
| 1023 | IPI00301609.8 | Serine/threonine-protein kinase Nek9                                           | 2.673 | 2.473 | 0.925 |
| 1024 | IPI00980165.2 | Mesencephalic astrocyte-derived neurotrophic factor                            | 1.674 | 1.749 | 1.045 |
| 1025 | IPI00894420.1 | dihydropyrimidinase-like 5                                                     | 3.363 | 2.218 | 0.660 |
| 1026 | IPI00915422.1 | coatamer subunit delta isoform 2                                               | 2.156 | 1.560 | 0.724 |
| 1027 | IPI00940506.2 | cDNA FLJ58519, highly similar to Hermansky-Pudlak syndro                       | 2.425 | 1.603 | 0.661 |
| 1028 | IPI01011998.1 | NADH dehydrogenase (ubiquinone) 1 alpha subcomplex, 8                          | 2.381 | 1.972 | 0.828 |
| 1029 | IPI00945124.1 | Brain my045 protein                                                            | 2.495 | 2.240 | 0.898 |
| 1030 | IPI00300299.6 | Signal peptidase complex subunit 3                                             | 2.157 | 1.833 | 0.850 |
| 1031 | IPI00940755.2 | density-regulated protein                                                      | 2.503 | 1.962 | 0.784 |

|      |               |                                                                       |       |       |       |
|------|---------------|-----------------------------------------------------------------------|-------|-------|-------|
| 1032 | IPI00909010.1 | cDNA FLJ59356, highly similar to N-acetylserotonin O-meth             | 2.876 | 2.446 | 0.851 |
| 1033 | IPI00916807.1 | MKI67 (FHA domain) interacting nucleolar phosphoprotein               | 2.286 | 2.563 | 1.121 |
| 1034 | IPI00644418.3 | endophilin-A2 isoform 3                                               | 2.160 | 1.980 | 0.917 |
| 1035 | IPI00890793.1 | iron-sulfur cluster scaffold homolog (E. coli)                        | 2.828 | 1.839 | 0.650 |
| 1036 | IPI00477468.1 | RNA polymerase-associated protein CTR9 homolog                        | 3.616 | 3.113 | 0.861 |
| 1037 | IPI00984662.1 | 28S ribosomal protein S29, mitochondrial isoform 3                    | 2.792 | 2.050 | 0.734 |
| 1038 | IPI00015809.1 | Probable tRNA threonylcarbamoyladenosine biosynthesis                 | 2.388 | 2.535 | 1.062 |
| 1039 | IPI00219411.3 | Isoform 2 of RAC-gamma serine/threonine-protein kinase                | 2.772 | 1.837 | 0.663 |
| 1040 | IPI00385642.1 | WD repeat domain 57 (U5 snRNP specific), isoform CRA_b                | 2.357 | 2.232 | 0.947 |
| 1041 | IPI00032851.1 | Coatomer subunit zeta-1                                               | 1.899 | 1.618 | 0.852 |
| 1042 | IPI00514469.1 | N-acetylneuraminic acid synthase                                      | 2.521 | 2.133 | 0.846 |
| 1043 | IPI00001539.8 | 3-ketoacyl-CoA thiolase, mitochondrial                                | 2.258 | 1.561 | 0.691 |
| 1044 | IPI00514444.1 | Insulin-degrading enzyme                                              | 2.201 | 1.840 | 0.836 |
| 1045 | IPI00017592.1 | Isoform 1 of LETM1 and EF-hand domain-containing protei               | 2.241 | 1.815 | 0.810 |
| 1046 | IPI00983309.1 | STT3, subunit of the oligosaccharyltransferase complex, h             | 5.327 | 3.403 | 0.639 |
| 1047 | IPI00145260.3 | Putative transferase CAF17, mitochondrial                             | 2.385 | 2.180 | 0.914 |
| 1048 | IPI00374272.3 | chromosome 5 open reading frame 51                                    | 2.387 | 2.624 | 1.100 |
| 1049 | IPI00655644.4 | inner membrane protein, mitochondrial                                 | 2.790 | 2.286 | 0.819 |
| 1050 | IPI01011236.1 | TUFT1                                                                 | 4.813 | 2.885 | 0.599 |
| 1051 | IPI00643078.1 | RAD23 homolog B                                                       | 2.952 | 2.205 | 0.747 |
| 1052 | IPI00025115.1 | AP-3 complex subunit sigma-2                                          | 2.215 | 1.542 | 0.696 |
| 1053 | IPI00220648.5 | Phosphomevalonate kinase                                              | 4.776 | 5.338 | 1.118 |
| 1054 | IPI00641843.3 | cDNA, FLJ78963, highly similar to Ubiquitin carboxyl-termin           | 2.141 | 2.189 | 1.022 |
| 1055 | IPI00830039.1 | Isoform 2 of Splicing factor U2AF 65 kDa subunit                      | 3.215 | 1.907 | 0.593 |
| 1056 | IPI01012107.1 | defender against cell death 1                                         | 2.112 | 1.590 | 0.753 |
| 1057 | IPI00305668.7 | 28S ribosomal protein S6, mitochondrial                               | 2.905 | 1.502 | 0.517 |
| 1058 | IPI00643648.1 | Phosphatidylserine decarboxylase                                      | 2.530 | 2.148 | 0.849 |
| 1059 | IPI00028091.3 | Actin-related protein 3                                               | 2.257 | 2.091 | 0.927 |
| 1060 | IPI00427502.1 | Isoform 2 of GH3 domain-containing protein                            | 2.474 | 2.172 | 0.878 |
| 1061 | IPI00029629.4 | E3 ubiquitin/ISG15 ligase TRIM25                                      | 2.987 | 2.558 | 0.856 |
| 1062 | IPI01010716.1 | cDNA FLJ90324 fis, clone NT2RP2001817, highly similar to N            | 2.060 | 1.771 | 0.860 |
| 1063 | IPI00396090.3 | Isoform 3 of Diphosphoinositol polyphosphate phosphoh                 | 2.252 | 1.608 | 0.714 |
| 1064 | IPI00902580.1 | cDNA FLJ11050 fis, clone PLACE1004564, highly similar to Cl           | 2.217 | 2.106 | 0.950 |
| 1065 | IPI00022865.2 | Cyclin-A2                                                             | 2.254 | 2.302 | 1.021 |
| 1066 | IPI00401804.3 | Isoform 3 of Vesicle-associated membrane protein 7                    | 2.024 | 1.739 | 0.859 |
| 1067 | IPI00658162.2 | cDNA FLJ36570 fis, clone TRACH2011302, highly similar to S            | 2.301 | 2.826 | 1.228 |
| 1068 | IPI00974168.1 | heat-responsive protein 12                                            | 3.834 | 2.102 | 0.548 |
| 1069 | IPI00893645.1 | septin 2                                                              | 2.320 | 1.886 | 0.813 |
| 1070 | IPI00005692.1 | 28S ribosomal protein S12, mitochondrial                              | 4.084 | 1.917 | 0.469 |
| 1071 | IPI00902652.1 | cDNA FLJ37148 fis, clone BRACE2025333, highly similar to H            | 2.207 | 1.890 | 0.856 |
| 1072 | IPI00977065.1 | cold shock domain containing E1, RNA-binding                          | 2.890 | 1.940 | 0.671 |
| 1073 | IPI00398822.1 | Isoform 2 of Zinc phosphodiesterase ELAC protein 2                    | 1.850 | 2.177 | 1.177 |
| 1074 | IPI00219090.1 | Isoform 2 of Protein arginine N-methyltransferase 7                   | 2.640 | 2.296 | 0.869 |
| 1075 | IPI00219604.3 | Isoform 1 of Dual specificity mitogen-activated protein kin           | 2.618 | 1.778 | 0.679 |
| 1076 | IPI00411886.5 | Nucleolar complex protein 2 homolog                                   | 2.064 | 1.977 | 0.958 |
| 1077 | IPI00973882.1 | ATPase, H <sup>+</sup> transporting, lysosomal 50/57kDa, V1 subunit h | 2.737 | 2.126 | 0.777 |
| 1078 | IPI00025329.1 | 60S ribosomal protein L19                                             | 3.648 | 2.929 | 0.803 |

|      |               |                                                             |       |       |       |
|------|---------------|-------------------------------------------------------------|-------|-------|-------|
| 1079 | IPI00041325.1 | H/ACA ribonucleoprotein complex subunit 2                   | 2.331 | 1.286 | 0.552 |
| 1080 | IPI01013434.1 | superoxide dismutase 2, mitochondrial                       | 1.510 | 1.248 | 0.826 |
| 1081 | IPI00176527.1 | ATP synthase subunit epsilon-like protein, mitochondrial    | 2.254 | 1.263 | 0.560 |
| 1082 | IPI00797314.1 | COP9 constitutive photomorphogenic homolog subunit 3 (A     | 2.457 | 1.857 | 0.756 |
| 1083 | IPI00943212.2 | ATPase, H+ transporting, lysosomal 38kDa, V0 subunit d1     | 1.992 | 2.495 | 1.252 |
| 1084 | IPI00556437.1 | Dynamin 2 isoform 4 variant (Fragment)                      | 3.066 | 2.248 | 0.733 |
| 1085 | IPI00026219.4 | Cleavage and polyadenylation specificity factor subunit 1   | 3.868 | 2.734 | 0.707 |
| 1086 | IPI00219718.3 | retinol-binding protein 1 isoform a                         | 4.374 | 2.082 | 0.476 |
| 1087 | IPI01012894.1 | cell division cycle and apoptosis regulator 1               | 5.202 | 7.323 | 1.408 |
| 1088 | IPI00847986.1 | Isoform 2 of 40S ribosomal protein S24                      | 2.579 | 2.005 | 0.777 |
| 1089 | IPI00514217.6 | Succinate-CoA ligase, ADP-forming, beta subunit             | 2.566 | 1.815 | 0.707 |
| 1090 | IPI00926706.1 | actin related protein 2/3 complex, subunit 1A, 41kDa        | 2.145 | 1.594 | 0.743 |
| 1091 | IPI00549942.3 | cDNA FLJ30306 fis, clone BRACE2003319                       | 3.656 | 1.979 | 0.541 |
| 1092 | IPI00979224.1 | family with sequence similarity 203, member A               | 5.407 | 2.194 | 0.406 |
| 1093 | IPI01009730.1 | Putative uncharacterized protein DKFZp547A1913              | 3.538 | 3.570 | 1.009 |
| 1094 | IPI00103263.3 | Wings apart-like homolog                                    | 3.612 | 2.862 | 0.792 |
| 1095 | IPI00742682.2 | Nucleoprotein TPR                                           | 2.504 | 2.441 | 0.975 |
| 1096 | IPI00003815.3 | Rho GDP-dissociation inhibitor 1                            | 2.717 | 2.175 | 0.800 |
| 1097 | IPI01010344.1 | PRP8 pre-mRNA processing factor 8 homolog (S. cerevisiae)   | 5.064 | 2.906 | 0.574 |
| 1098 | IPI00879774.1 | Cysteine-rich with EGF-like domains 2                       | 2.940 | 2.228 | 0.758 |
| 1099 | IPI00005162.3 | Actin-related protein 2/3 complex subunit 3                 | 3.401 | 2.155 | 0.634 |
| 1100 | IPI00984053.1 | serine hydroxymethyltransferase 1 (soluble)                 | 1.908 | 1.579 | 0.828 |
| 1101 | IPI00658053.1 | cathepsin D                                                 | 3.031 | 1.859 | 0.613 |
| 1102 | IPI00873515.2 | Isoform 2 of Probable bifunctional methylenetetrahydrofo    | 2.020 | 2.302 | 1.139 |
| 1103 | IPI00925248.1 | Uncharacterized protein                                     | 2.724 | 2.571 | 0.944 |
| 1104 | IPI00376117.1 | Isoform 2 of Mitochondrial import receptor subunit TOM40    | 2.882 | 1.931 | 0.670 |
| 1105 | IPI00916763.1 | heat shock 10kDa protein 1 (chaperonin 10)                  | 1.971 | 1.339 | 0.679 |
| 1106 | IPI00423157.4 | Isoform 11 of Serine/threonine-protein kinase Chk2          | 2.785 | 1.322 | 0.475 |
| 1107 | IPI00216237.5 | 60S ribosomal protein L36                                   | 2.494 | 1.878 | 0.753 |
| 1108 | IPI00784650.3 | uncharacterized LOC100131551                                | 5.900 | 3.021 | 0.512 |
| 1109 | IPI00917636.1 | acyl-CoA synthetase long-chain family member 3              | 2.455 | 2.460 | 1.002 |
| 1110 | IPI00061282.2 | Protein kinase, AMP-activated, alpha 1 catalytic subunit, i | 3.425 | 2.043 | 0.596 |
| 1111 | IPI00977736.1 | calyculin-binding protein isoform 2                         | 2.736 | 2.001 | 0.732 |
| 1112 | IPI00220919.1 | Isoform 3 of DNA (cytosine-5)-methyltransferase 1           | 2.816 | 2.448 | 0.869 |
| 1113 | IPI00014603.1 | Ras-related protein Rab-9B                                  | 2.963 | 1.662 | 0.561 |
| 1114 | IPI00418290.1 | 39S ribosomal protein L14, mitochondrial                    |       |       | 1.284 |
| 1115 | IPI00903276.1 | cDNA FLJ36073 fis, clone TESTI2019697, highly similar to TH | 2.725 | 1.973 | 0.724 |
| 1116 | IPI00902466.1 | cDNA FLJ11861 fis, clone HEMBA1006885, highly similar to P  | 2.473 | 1.926 | 0.779 |
| 1117 | IPI00419898.1 | uncharacterized LOC440157                                   | 2.161 | 1.533 | 0.709 |
| 1118 | IPI00789985.1 | Isoform 2 of Ran guanine nucleotide release factor          | 1.916 | 1.429 | 0.746 |
| 1119 | IPI00975997.1 | cancer/testis antigen family 45 member A5-like isoform 2,   | 2.885 | 2.298 | 0.796 |
| 1120 | IPI00790648.2 | transferrin                                                 | 1.675 | 2.094 | 1.250 |
| 1121 | IPI00978109.1 | DIS3 mitotic control homolog (S. cerevisiae)                | 1.909 | 1.668 | 0.874 |
| 1122 | IPI00017283.2 | Isoleucyl-tRNA synthetase, mitochondrial                    | 1.646 | 1.887 | 1.147 |
| 1123 | IPI00939558.2 | cDNA FLJ38696 fis, clone KIDNE2001931, highly similar to H  | 2.542 | 1.978 | 0.778 |
| 1124 | IPI00294742.7 | Isoform 1 of La-related protein 7                           | 2.653 | 2.077 | 0.783 |
| 1125 | IPI00973715.2 | dihydropyrimidinase                                         | 5.058 | 2.835 | 0.561 |



|      |               |                                                            |       |       |       |
|------|---------------|------------------------------------------------------------|-------|-------|-------|
| 1126 | IPI00909332.2 | replication termination factor 2 domain containing 1       | 2.124 | 2.600 | 1.224 |
| 1127 | IPI00301323.1 | ATP-dependent RNA helicase DDX18                           | 2.578 | 1.525 | 0.591 |
| 1128 | IPI00788612.2 | LIM and senescent cell antigen-like-containing domain p    | 2.453 | 2.440 | 0.995 |
| 1129 | IPI00247439.3 | Isoform 2 of STE20-like serine/threonine-protein kinase    | 3.760 | 2.860 | 0.761 |
| 1130 | IPI00219197.3 | Isoform 1 of Ubiquitin-protein ligase E3A                  | 2.008 | 2.234 | 1.112 |
| 1131 | IPI00893703.1 | ribosomal protein S7                                       | 2.254 | 2.147 | 0.953 |
| 1132 | IPI00872684.2 | cDNA FLJ54141, highly similar to Ezrin                     | 2.026 | 1.668 | 0.823 |
| 1133 | IPI00514858.1 | Adenylyl cyclase-associated protein                        | 2.345 | 2.532 | 1.080 |
| 1134 | IPI00909477.1 | cDNA FLJ54108, highly similar to Homo sapiens smooth mu    | 1.346 | 2.272 | 1.687 |
| 1135 | IPI01009526.1 | cDNA FLJ61034, highly similar to Mitochondrial dicarboxyla | 2.514 | 1.811 | 0.720 |
| 1136 | IPI00220716.2 | Isoform 2 of Putative RNA-binding protein 15               | 2.848 | 2.472 | 0.868 |
| 1137 | IPI00914006.2 | cDNA FLJ56235, highly similar to Dynactin subunit 4        | 2.767 | 2.768 | 1.000 |
| 1138 | IPI00219833.2 | Mitochondrial import inner membrane translocase subun      | 2.900 | 2.237 | 0.771 |
| 1139 | IPI00796237.1 | DUSP3 protein                                              | 2.766 | 1.800 | 0.651 |
| 1140 | IPI00443909.1 | Isoform 1 of Protein canopy homolog 2                      | 2.782 | 2.130 | 0.766 |
| 1141 | IPI00910004.1 | cDNA FLJ59139, highly similar to Vesicle-associated memb   | 3.625 | 2.229 | 0.615 |
| 1142 | IPI01012992.1 | Coiled-coil domain-containing protein 12                   | 2.621 | 2.533 | 0.966 |
| 1143 | IPI00020793.3 | Isoform 2 of 60S ribosome subunit biogenesis protein NIP   | 1.861 | 1.630 | 0.876 |
| 1144 | IPI00922847.1 | cDNA FLJ50115, moderately similar to Membrane-associat     | 1.854 | 1.264 | 0.682 |
| 1145 | IPI00479722.2 | Proteasome activator complex subunit 1                     | 3.502 | 2.108 | 0.602 |

**Table S6.** A list of selected known substrates of EuHMT1 and EuHMT2 identified in the current study. These substrates are pulled down either only in mutant-transfected cell lysates (for non-quantitative MS) or enriched with at least >1.5 fold in mutant-transfected cell lysates than control (for TMT-based MS).

| Substrates                                                | EuHMT1/2<br>Mutant-<br>transfected                    | Control<br>vector-<br>transfected |
|-----------------------------------------------------------|-------------------------------------------------------|-----------------------------------|
| Histone H1.4                                              | YES                                                   | NO                                |
| Histone H3                                                | YES                                                   | NO                                |
| EuHMT1/2<br>(automethylation)                             | YES                                                   | NO                                |
| Widely Interspaced<br>Zinc Finger Motifs<br>Protein (WIZ) | YES                                                   | NO                                |
| Chromodomain Y-<br>Like Protein (CDYL)                    | YES                                                   | NO                                |
| DNA (cytosine-5)-<br>methyltransferase 1                  | YES                                                   | NO                                |
| Cellular tumor antigen<br>p53                             | TMT ratio > 1.8<br>in both samples<br>than in control | --                                |
| highly similar to<br>Histone deacetylase 1                | TMT ratio > 1.8<br>in both samples<br>than in control | --                                |

**Table S7.** Analysis of EuHMT1 and EuHMT2 substrates by IPA (Ingenuity® Systems, [www.ingenuity.com](http://www.ingenuity.com)). The IPI (International Protein Index) accession numbers (common proteins present in Table S2-S5) were uploaded to search the cellular localization using Ingenuity database.

| Serial | Accession     | Location            | Serial | Accession     | Location        | Serial | Accession     | Location            |
|--------|---------------|---------------------|--------|---------------|-----------------|--------|---------------|---------------------|
| 1      | IPI00027442.4 | Cytoplasm           | 47     | IPI00449201.2 | Cytoplasm       | 93     | IPI00553185.2 | Cytoplasm           |
| 2      | IPI00250297.3 | Cytoplasm           | 48     | IPI00925601.1 | Cytoplasm       | 94     | IPI01014604.1 | Cytoplasm           |
| 3      | IPI00981292.1 | Cytoplasm           | 49     | IPI00977640.1 | Plasma Membrane | 95     | IPI00010720.1 | Cytoplasm           |
| 4      | IPI00303207.3 | Cytoplasm           | 50     | IPI00177817.4 | Cytoplasm       | 96     | IPI00552590.1 | Cytoplasm           |
| 5      | IPI00792186.4 | Cytoplasm           | 51     | IPI00471928.6 | Cytoplasm       | 97     | IPI00952607.1 | Cytoplasm           |
| 6      | IPI01010004.1 | Cytoplasm           | 52     | IPI00456747.1 | Cytoplasm       | 98     | IPI00784090.2 | Cytoplasm           |
| 7      | IPI00001539.8 | Cytoplasm           | 53     | IPI00963825.1 | Cytoplasm       | 99     | IPI00013122.1 | Cytoplasm           |
| 8      | IPI01014863.1 | Cytoplasm           | 54     | IPI00007611.1 | Cytoplasm       | 100    | IPI00016786.1 | Cytoplasm           |
| 9      | IPI00021290.5 | Cytoplasm           | 55     | IPI00025285.3 | Cytoplasm       | 101    | IPI00023530.7 | Nucleus             |
| 10     | IPI00909879.1 | Cytoplasm           | 56     | IPI00973882.1 | Cytoplasm       | 102    | IPI00942408.1 | Nucleus             |
| 11     | IPI01011431.1 | Cytoplasm           | 57     | IPI00917463.1 | Cytoplasm       | 103    | IPI00012011.6 | Nucleus             |
| 12     | IPI00410615.2 | Cytoplasm           | 58     | IPI00000643.1 | Cytoplasm       | 104    | IPI00015833.1 | Cytoplasm           |
| 13     | IPI00917636.1 | Cytoplasm           | 59     | IPI00218200.8 | Cytoplasm       | 105    | IPI00748354.1 | Cytoplasm           |
| 14     | IPI00021439.1 | Cytoplasm           | 60     | IPI00025178.3 | Nucleus         | 106    | IPI01012026.1 | Nucleus             |
| 15     | IPI01009456.1 | Cytoplasm           | 61     | IPI00472003.1 | Cytoplasm       | 107    | IPI00977749.1 | unknown             |
| 16     | IPI01015738.1 | Cytoplasm           | 62     | IPI00794082.2 | Cytoplasm       | 108    | IPI00022977.1 | Cytoplasm           |
| 17     | IPI00760588.2 | Nucleus             | 63     | IPI00032900.1 | Cytoplasm       | 109    | IPI00010896.3 | Nucleus             |
| 18     | IPI00983658.1 | Nucleus             | 64     | IPI01015329.1 | Nucleus         | 110    | IPI00980429.1 | Plasma Membrane     |
| 19     | IPI00945912.1 | Cytoplasm           | 65     | IPI00797616.2 | Cytoplasm       | 111    | IPI00514049.1 | Nucleus             |
| 20     | IPI00219065.2 | Cytoplasm           | 66     | IPI00916549.1 | Nucleus         | 112    | IPI00430813.3 | Nucleus             |
| 21     | IPI00012007.6 | Cytoplasm           | 67     | IPI01010654.1 | Nucleus         | 113    | IPI01014726.1 | Cytoplasm           |
| 22     | IPI00965185.1 | Extracellular Space | 68     | IPI00013180.2 | Nucleus         | 114    | IPI00443909.1 | Plasma Membrane     |
| 23     | IPI00011916.1 | Plasma Membrane     | 69     | IPI00180128.4 | Cytoplasm       | 115    | IPI00184821.1 | Cytoplasm           |
| 24     | IPI00218988.4 | Cytoplasm           | 70     | IPI00006980.1 | Nucleus         | 116    | IPI00940293.5 | Extracellular Space |
| 25     | IPI00940222.2 | Cytoplasm           | 71     | IPI00001655.1 | Nucleus         | 117    | IPI00783982.1 | Cytoplasm           |
| 26     | IPI00413641.7 | Cytoplasm           | 72     | IPI00031526.3 | Nucleus         | 118    | IPI00797314.1 | Cytoplasm           |
| 27     | IPI01012747.1 | Cytoplasm           | 73     | IPI00550689.3 | Cytoplasm       | 119    | IPI00966482.1 | Cytoplasm           |
| 28     | IPI00910420.1 | Cytoplasm           | 74     | IPI00374272.3 | unknown         | 120    | IPI00925574.1 | Nucleus             |
| 29     | IPI01010794.1 | Nucleus             | 75     | IPI00892533.1 | unknown         | 121    | IPI00032851.1 | Cytoplasm           |
| 30     | IPI00759824.2 | Nucleus             | 76     | IPI00430781.1 | Cytoplasm       | 122    | IPI00943173.1 | Cytoplasm           |
| 31     | IPI00964635.1 | Plasma Membrane     | 77     | IPI00170972.2 | unknown         | 123    | IPI00017704.3 | Cytoplasm           |
| 32     | IPI01011531.2 | Plasma Membrane     | 78     | IPI00218414.5 | Cytoplasm       | 124    | IPI00025086.4 | Cytoplasm           |
| 33     | IPI00215911.3 | Nucleus             | 79     | IPI00893035.1 | Cytoplasm       | 125    | IPI00021785.2 | Cytoplasm           |
| 34     | IPI00848298.1 | Extracellular Space | 80     | IPI00020599.1 | Cytoplasm       | 126    | IPI00797738.1 | Cytoplasm           |
| 35     | IPI00642457.1 | Cytoplasm           | 81     | IPI00604431.1 | Cytoplasm       | 127    | IPI00967916.1 | Cytoplasm           |
| 36     | IPI00215914.5 | Cytoplasm           | 82     | IPI00941747.1 | Cytoplasm       | 128    | IPI00093057.6 | Cytoplasm           |
| 37     | IPI00792330.2 | Cytoplasm           | 83     | IPI00514858.1 | Plasma Membrane | 129    | IPI00026219.4 | Nucleus             |
| 38     | IPI00853337.1 | Cytoplasm           | 84     | IPI00641266.4 | Cytoplasm       | 130    | IPI00902580.1 | Nucleus             |
| 39     | IPI00003815.3 | Cytoplasm           | 85     | IPI00025084.3 | Cytoplasm       | 131    | IPI00004839.1 | Cytoplasm           |
| 40     | IPI00003326.4 | Cytoplasm           | 86     | IPI00304409.3 | Cytoplasm       | 132    | IPI00383539.5 | Cytoplasm           |
| 41     | IPI00003327.1 | Cytoplasm           | 87     | IPI00939491.1 | Cytoplasm       | 133    | IPI00977065.1 | Cytoplasm           |
| 42     | IPI00926706.1 | Cytoplasm           | 88     | IPI01012205.1 | Cytoplasm       | 134    | IPI00219994.2 | Nucleus             |
| 43     | IPI00005162.3 | Cytoplasm           | 89     | IPI01014449.1 | Nucleus         | 135    | IPI00020602.1 | Cytoplasm           |
| 44     | IPI00550234.4 | Cytoplasm           | 90     | IPI00297579.4 | Nucleus         | 136    | IPI00002824.7 | Nucleus             |
| 45     | IPI00909010.1 | Cytoplasm           | 91     | IPI00878039.2 | unknown         | 137    | IPI00021828.1 | Cytoplasm           |
| 46     | IPI00925572.1 | Cytoplasm           | 92     | IPI00297779.7 | Cytoplasm       | 138    | IPI00554626.3 | Nucleus             |

| Serial | Accession     | Location  | Serial | Accession      | Location            | Serial | Accession      | Location            |
|--------|---------------|-----------|--------|----------------|---------------------|--------|----------------|---------------------|
| 139    | IPI00908512.2 | Cytoplasm | 185    | IPI01013095.1  | Cytoplasm           | 231    | IPI00218112.1  | Cytoplasm           |
| 140    | IPI00290142.5 | Nucleus   | 186    | IPI00025491.1  | Cytoplasm           | 232    | IPI00001159.11 | Cytoplasm           |
| 141    | IPI00978325.1 | Cytoplasm | 187    | IPI00926917.1  | Cytoplasm           | 233    | IPI00910113.1  | Cytoplasm           |
| 142    | IPI00966243.1 | Cytoplasm | 188    | IPI00014263.1  | Cytoplasm           | 234    | IPI00640006.1  | Cytoplasm           |
| 143    | IPI00879792.1 | Cytoplasm | 189    | IPI00022648.2  | Cytoplasm           | 235    | IPI00291783.4  | Nucleus             |
| 144    | IPI00917605.1 | Cytoplasm | 190    | IPI00411704.9  | Cytoplasm           | 236    | IPI00894139.1  | Cytoplasm           |
| 145    | IPI01012107.1 | Cytoplasm | 191    | IPI00398822.1  | Nucleus             | 237    | IPI00917449.1  | Cytoplasm           |
| 146    | IPI00984662.1 | Cytoplasm | 192    | IPI00940851.1  | Cytoplasm           | 238    | IPI00023728.1  | Cytoplasm           |
| 147    | IPI00006754.1 | Cytoplasm | 193    | IPI00013452.11 | Cytoplasm           | 239    | IPI00219025.3  | Cytoplasm           |
| 148    | IPI00917166.1 | Cytoplasm | 194    | IPI00029631.1  | Nucleus             | 240    | IPI01015801.1  | Cytoplasm           |
| 149    | IPI00914006.2 | Nucleus   | 195    | IPI00644349.4  | Plasma Membrane     | 241    | IPI00028414.3  | Cytoplasm           |
| 150    | IPI00952778.2 | Nucleus   | 196    | IPI00936931.2  | Plasma Membrane     | 242    | IPI00026268.3  | Plasma Membrane     |
| 151    | IPI00155054.3 | Nucleus   | 197    | IPI00386755.2  | Cytoplasm           | 243    | IPI00964515.1  | Cytoplasm           |
| 152    | IPI00798375.2 | Nucleus   | 198    | IPI00024911.1  | Cytoplasm           | 244    | IPI00003886.3  | Nucleus             |
| 153    | IPI01011782.1 | Nucleus   | 199    | IPI00645836.1  | Cytoplasm           | 245    | IPI00061525.3  | Cytoplasm           |
| 154    | IPI00030320.4 | Nucleus   | 200    | IPI00902463.1  | unknown             | 246    | IPI00018206.4  | Cytoplasm           |
| 155    | IPI00967473.1 | Nucleus   | 201    | IPI00895865.1  | Cytoplasm           | 247    | IPI00926599.1  | Cytoplasm           |
| 156    | IPI00940755.2 | unknown   | 202    | IPI00878484.1  | Nucleus             | 248    | IPI00908881.2  | Extracellular Space |
| 157    | IPI00010882.3 | Nucleus   | 203    | IPI00009464.1  | Nucleus             | 249    | IPI00927606.1  | Cytoplasm           |
| 158    | IPI00927809.1 | Nucleus   | 204    | IPI00073602.1  | Nucleus             | 250    | IPI00037448.3  | Cytoplasm           |
| 159    | IPI00978109.1 | Nucleus   | 205    | IPI00872684.2  | Plasma Membrane     | 251    | IPI00029557.3  | Cytoplasm           |
| 160    | IPI00008454.1 | Cytoplasm | 206    | IPI00788781.1  | Cytoplasm           | 252    | IPI00847896.1  | Nucleus             |
| 161    | IPI00794610.2 | Cytoplasm | 207    | IPI00101734.5  | Cytoplasm           | 253    | IPI00218829.9  | Cytoplasm           |
| 162    | IPI00235412.7 | Cytoplasm | 208    | IPI00039626.3  | Cytoplasm           | 254    | IPI00953696.1  | Cytoplasm           |
| 163    | IPI00220919.1 | Nucleus   | 209    | IPI00303722.5  | Cytoplasm           | 255    | IPI00845493.1  | Cytoplasm           |
| 164    | IPI00004454.3 | Cytoplasm | 210    | IPI00334282.2  | Extracellular Space | 256    | IPI00019755.3  | Cytoplasm           |
| 165    | IPI00894420.1 | Cytoplasm | 211    | IPI00909657.1  | Cytoplasm           | 257    | IPI00219757.13 | Cytoplasm           |
| 166    | IPI00031836.3 | Cytoplasm | 212    | IPI00300074.4  | Cytoplasm           | 258    | IPI00793076.1  | Nucleus             |
| 167    | IPI00964348.1 | unknown   | 213    | IPI00026781.3  | Cytoplasm           | 259    | IPI00294398.2  | Cytoplasm           |
| 168    | IPI00794545.1 | Nucleus   | 214    | IPI00019326.1  | Cytoplasm           | 260    | IPI00910697.1  | Cytoplasm           |
| 169    | IPI00456969.1 | Cytoplasm | 215    | IPI00759715.1  | Cytoplasm           | 261    | IPI01009997.1  | Nucleus             |
| 170    | IPI00019329.1 | Cytoplasm | 216    | IPI00644668.3  | Cytoplasm           | 262    | IPI00100984.4  | unknown             |
| 171    | IPI00062037.1 | Cytoplasm | 217    | IPI00184854.1  | Cytoplasm           | 263    | IPI00916207.1  | Cytoplasm           |
| 172    | IPI00398758.1 | Cytoplasm | 218    | IPI00219005.3  | Nucleus             | 264    | IPI00966135.1  | Nucleus             |
| 173    | IPI00396485.3 | Cytoplasm | 219    | IPI00553169.5  | Cytoplasm           | 265    | IPI00000335.1  | Cytoplasm           |
| 174    | IPI00014424.1 | Cytoplasm | 220    | IPI00382699.2  | Cytoplasm           | 266    | IPI00170924.2  | unknown             |
| 175    | IPI00178440.3 | Cytoplasm | 221    | IPI00908741.1  | Cytoplasm           | 267    | IPI00003935.6  | Nucleus             |
| 176    | IPI01015965.1 | Cytoplasm | 222    | IPI00747810.3  | Cytoplasm           | 268    | IPI00220667.3  | Cytoplasm           |
| 177    | IPI00003588.1 | Cytoplasm | 223    | IPI00554521.2  | Cytoplasm           | 269    | IPI00644653.1  | Nucleus             |
| 178    | IPI00917777.1 | Nucleus   | 224    | IPI00845477.1  | Nucleus             | 270    | IPI00643317.3  | Nucleus             |
| 179    | IPI00942420.2 | Nucleus   | 225    | IPI00983652.2  | Nucleus             | 271    | IPI00026824.2  | Cytoplasm           |
| 180    | IPI00220795.4 | Nucleus   | 226    | IPI00854677.1  | Nucleus             | 272    | IPI00465365.4  | Nucleus             |
| 181    | IPI00219678.3 | Cytoplasm | 227    | IPI00011454.1  | Cytoplasm           | 273    | IPI00414696.1  | Nucleus             |
| 182    | IPI00903191.1 | Cytoplasm | 228    | IPI00219018.7  | Cytoplasm           | 274    | IPI00927677.1  | Nucleus             |
| 183    | IPI00977658.1 | Cytoplasm | 229    | IPI00783097.4  | Cytoplasm           | 275    | IPI00964686.1  | Nucleus             |
| 184    | IPI00012795.3 | Cytoplasm | 230    | IPI00025273.1  | Cytoplasm           | 276    | IPI00759596.1  | Nucleus             |

| Serial | Accession     | Location            | Serial | Accession      | Location            | Serial | Accession     | Location        |
|--------|---------------|---------------------|--------|----------------|---------------------|--------|---------------|-----------------|
| 277    | IPI00003881.5 | Nucleus             | 323    | IPI00217966.9  | Cytoplasm           | 369    | IPI00945124.1 | Cytoplasm       |
| 278    | IPI00013881.6 | Nucleus             | 324    | IPI00219217.3  | Cytoplasm           | 370    | IPI00032881.2 | Cytoplasm       |
| 279    | IPI00216492.1 | Nucleus             | 325    | IPI00384155.1  | Cytoplasm           | 371    | IPI00926139.1 | Cytoplasm       |
| 280    | IPI00807545.1 | Nucleus             | 326    | IPI01010750.1  | Nucleus             | 372    | IPI00967112.1 | Cytoplasm       |
| 281    | IPI00383296.5 | Nucleus             | 327    | IPI00788612.2  | Plasma Membrane     | 373    | IPI00795057.1 | Cytoplasm       |
| 282    | IPI00856038.2 | Nucleus             | 328    | IPI00642982.1  | Cytoplasm           | 374    | IPI01018329.1 | Nucleus         |
| 283    | IPI00644079.4 | Nucleus             | 329    | IPI00396321.1  | Cytoplasm           | 375    | IPI00893025.1 | Nucleus         |
| 284    | IPI00045498.4 | Nucleus             | 330    | IPI00001146.1  | Nucleus             | 376    | IPI00171798.1 | Nucleus         |
| 285    | IPI00218493.7 | Cytoplasm           | 331    | IPI00219077.4  | Cytoplasm           | 377    | IPI00983602.1 | Cytoplasm       |
| 286    | IPI00336094.5 | Cytoplasm           | 332    | IPI00893219.2  | Nucleus             | 378    | IPI00873515.2 | unknown         |
| 287    | IPI00414384.1 | Cytoplasm           | 333    | IPI00983098.1  | Cytoplasm           | 379    | IPI00924816.1 | Nucleus         |
| 288    | IPI00027230.3 | Cytoplasm           | 334    | IPI00646978.4  | Cytoplasm           | 380    | IPI00005024.3 | Nucleus         |
| 289    | IPI00002966.2 | Cytoplasm           | 335    | IPI00012369.1  | Nucleus             | 381    | IPI00397526.3 | Cytoplasm       |
| 290    | IPI00964409.3 | Cytoplasm           | 336    | IPI00219306.1  | Nucleus             | 382    | IPI00019502.3 | Cytoplasm       |
| 291    | IPI00966238.2 | Cytoplasm           | 337    | IPI00219604.3  | Cytoplasm           | 383    | IPI00440719.2 | Nucleus         |
| 292    | IPI00784154.1 | Cytoplasm           | 338    | IPI00888475.2  | Cytoplasm           | 384    | IPI00470922.2 | Cytoplasm       |
| 293    | IPI00916763.1 | Cytoplasm           | 339    | IPI00641181.5  | Cytoplasm           | 385    | IPI00654793.2 | Cytoplasm       |
| 294    | IPI00218993.1 | Cytoplasm           | 340    | IPI00008240.2  | Cytoplasm           | 386    | IPI00604652.1 | Cytoplasm       |
| 295    | IPI00982482.2 | Cytoplasm           | 341    | IPI00911041.1  | Cytoplasm           | 387    | IPI00922322.1 | Nucleus         |
| 296    | IPI00017283.2 | Cytoplasm           | 342    | IPI00010157.1  | Cytoplasm           | 388    | IPI00306960.3 | Cytoplasm       |
| 297    | IPI00145260.3 | Cytoplasm           | 343    | IPI00967721.1  | Nucleus             | 389    | IPI00925237.1 | Nucleus         |
| 298    | IPI00514444.1 | Extracellular Space | 344    | IPI01013402.1  | Nucleus             | 390    | IPI00604620.3 | Nucleus         |
| 299    | IPI01015385.1 | Cytoplasm           | 345    | IPI00013214.2  | Nucleus             | 391    | IPI00513841.1 | Plasma Membrane |
| 300    | IPI00921820.1 | Cytoplasm           | 346    | IPI00974419.1  | Nucleus             | 392    | IPI00011770.1 | Cytoplasm       |
| 301    | IPI00304417.7 | Cytoplasm           | 347    | IPI00877948.1  | Nucleus             | 393    | IPI00946474.1 | Cytoplasm       |
| 302    | IPI00008557.6 | Cytoplasm           | 348    | IPI00552546.1  | Nucleus             | 394    | IPI00023064.1 | Cytoplasm       |
| 303    | IPI00289819.5 | Plasma Membrane     | 349    | IPI00915869.3  | Cytoplasm           | 395    | IPI01014044.1 | Cytoplasm       |
| 304    | IPI00005198.2 | Nucleus             | 350    | IPI00291006.2  | Cytoplasm           | 396    | IPI00220059.5 | Cytoplasm       |
| 305    | IPI00219330.2 | Nucleus             | 351    | IPI00399089.4  | Extracellular Space | 397    | IPI00925853.1 | Cytoplasm       |
| 306    | IPI00156374.6 | Nucleus             | 352    | IPI00022239.7  | Cytoplasm           | 398    | IPI00301609.8 | Nucleus         |
| 307    | IPI00793443.2 | Nucleus             | 353    | IPI00409639.1  | unknown             | 399    | IPI00301051.3 | unknown         |
| 308    | IPI00007402.3 | Nucleus             | 354    | IPI00783001.1  | unknown             | 400    | IPI00041325.1 | Nucleus         |
| 309    | IPI00185146.5 | Nucleus             | 355    | IPI00293276.10 | Extracellular Space | 401    | IPI00026167.5 | Nucleus         |
| 310    | IPI00009342.1 | Cytoplasm           | 356    | IPI00916807.1  | Nucleus             | 402    | IPI00020793.3 | Nucleus         |
| 311    | IPI00217563.4 | Plasma Membrane     | 357    | IPI00184525.2  | Cytoplasm           | 403    | IPI00005675.3 | Nucleus         |
| 312    | IPI00060715.1 | Plasma Membrane     | 358    | IPI00418290.1  | Cytoplasm           | 404    | IPI01015780.1 | Nucleus         |
| 313    | IPI00385834.3 | Nucleus             | 359    | IPI00556611.1  | Cytoplasm           | 405    | IPI00012315.2 | Cytoplasm       |
| 314    | IPI00909299.1 | Cytoplasm           | 360    | IPI00162330.3  | Cytoplasm           | 406    | IPI00411886.5 | Nucleus         |
| 315    | IPI00002214.1 | Nucleus             | 361    | IPI00794240.1  | Cytoplasm           | 407    | IPI00922367.1 | Nucleus         |
| 316    | IPI00946316.1 | Nucleus             | 362    | IPI00061531.4  | Cytoplasm           | 408    | IPI00032849.2 | Nucleus         |
| 317    | IPI00001639.2 | Nucleus             | 363    | IPI00219351.3  | Cytoplasm           | 409    | IPI00411937.4 | Nucleus         |
| 318    | IPI00029239.2 | Cytoplasm           | 364    | IPI00005692.1  | Cytoplasm           | 410    | IPI01015230.1 | Cytoplasm       |
| 319    | IPI00789806.2 | Cytoplasm           | 365    | IPI00005050.1  | Cytoplasm           | 411    | IPI00220740.1 | Nucleus         |
| 320    | IPI00985284.1 | Cytoplasm           | 366    | IPI00550037.3  | Cytoplasm           | 412    | IPI00022640.1 | Cytoplasm       |
| 321    | IPI01014783.1 | Cytoplasm           | 367    | IPI00032872.3  | Cytoplasm           | 413    | IPI00019407.1 | Cytoplasm       |
| 322    | IPI00296370.2 | unknown             | 368    | IPI00018691.1  | Cytoplasm           | 414    | IPI01012417.1 | Nucleus         |

| Serial | Accession     | Location        | Serial | Accession     | Location            | Serial | Accession     | Location        |
|--------|---------------|-----------------|--------|---------------|---------------------|--------|---------------|-----------------|
| 415    | IPI00549389.3 | Nucleus         | 461    | IPI00927892.1 | Cytoplasm           | 507    | IPI01015427.1 | Nucleus         |
| 416    | IPI00973891.1 | unknown         | 462    | IPI00220648.5 | Cytoplasm           | 508    | IPI00021435.3 | Nucleus         |
| 417    | IPI00646917.1 | Nucleus         | 463    | IPI00915874.1 | Nucleus             | 509    | IPI00979951.1 | Nucleus         |
| 418    | IPI00396090.3 | Cytoplasm       | 464    | IPI00017672.4 | Nucleus             | 510    | IPI00216770.1 | Nucleus         |
| 419    | IPI00448974.2 | Nucleus         | 465    | IPI00894110.1 | Cytoplasm           | 511    | IPI00555749.1 | Nucleus         |
| 420    | IPI00291755.6 | Nucleus         | 466    | IPI01015636.1 | Nucleus             | 512    | IPI00456695.1 | Cytoplasm       |
| 421    | IPI00644506.1 | Nucleus         | 467    | IPI00556021.3 | Nucleus             | 513    | IPI00552190.1 | Cytoplasm       |
| 422    | IPI00290416.3 | Cytoplasm       | 468    | IPI00008436.4 | Nucleus             | 514    | IPI00105598.3 | Cytoplasm       |
| 423    | IPI00015809.1 | unknown         | 469    | IPI00873948.3 | Nucleus             | 515    | IPI00335069.2 | Cytoplasm       |
| 424    | IPI01012383.1 | Cytoplasm       | 470    | IPI00006113.1 | Nucleus             | 516    | IPI00024821.1 | Cytoplasm       |
| 425    | IPI00916535.1 | Cytoplasm       | 471    | IPI00015018.1 | Cytoplasm           | 517    | IPI01015295.1 | Cytoplasm       |
| 426    | IPI00010796.1 | Cytoplasm       | 472    | IPI00419585.9 | Cytoplasm           | 518    | IPI00019927.2 | Cytoplasm       |
| 427    | IPI01009790.1 | unknown         | 473    | IPI00646304.4 | Cytoplasm           | 519    | IPI00937278.2 | Cytoplasm       |
| 428    | IPI00642944.1 | Cytoplasm       | 474    | IPI00003927.5 | Cytoplasm           | 520    | IPI00479722.2 | Cytoplasm       |
| 429    | IPI00026546.1 | Cytoplasm       | 475    | IPI00026519.1 | Cytoplasm           | 521    | IPI00943181.1 | Cytoplasm       |
| 430    | IPI00815732.1 | Cytoplasm       | 476    | IPI00643915.1 | Nucleus             | 522    | IPI00031106.1 | unknown         |
| 431    | IPI00449049.5 | Nucleus         | 477    | IPI00007019.1 | Plasma Membrane     | 523    | IPI01009339.1 | Nucleus         |
| 432    | IPI00218568.7 | Nucleus         | 478    | IPI01015454.1 | Nucleus             | 524    | IPI00179964.5 | Nucleus         |
| 433    | IPI00900327.2 | Nucleus         | 479    | IPI00980919.1 | Cytoplasm           | 525    | IPI00783302.1 | Cytoplasm       |
| 434    | IPI00922359.1 | Cytoplasm       | 480    | IPI00429689.3 | Cytoplasm           | 526    | IPI00303568.3 | Cytoplasm       |
| 435    | IPI00647084.2 | Nucleus         | 481    | IPI00908543.1 | Cytoplasm           | 527    | IPI00908647.1 | Cytoplasm       |
| 436    | IPI00924740.1 | Cytoplasm       | 482    | IPI00332511.5 | Cytoplasm           | 528    | IPI00032903.3 | Cytoplasm       |
| 437    | IPI00549885.4 | Cytoplasm       | 483    | IPI01012187.1 | Nucleus             | 529    | IPI00376503.2 | Cytoplasm       |
| 438    | IPI00893541.1 | Cytoplasm       | 484    | IPI00000874.1 | Cytoplasm           | 530    | IPI00016513.5 | Cytoplasm       |
| 439    | IPI01013559.1 | Cytoplasm       | 485    | IPI00909207.1 | Cytoplasm           | 531    | IPI00646415.1 | Cytoplasm       |
| 440    | IPI00010414.4 | Cytoplasm       | 486    | IPI00374151.1 | Cytoplasm           | 532    | IPI00005719.1 | Cytoplasm       |
| 441    | IPI00791490.1 | Cytoplasm       | 487    | IPI00759663.1 | Cytoplasm           | 533    | IPI00008964.3 | Cytoplasm       |
| 442    | IPI00219446.5 | Cytoplasm       | 488    | IPI00220301.5 | Cytoplasm           | 534    | IPI00016339.4 | Cytoplasm       |
| 443    | IPI00178047.7 | Nucleus         | 489    | IPI00061282.2 | Cytoplasm           | 535    | IPI00945574.1 | Cytoplasm       |
| 444    | IPI00909399.2 | Cytoplasm       | 490    | IPI01014354.1 | Cytoplasm           | 536    | IPI00014603.1 | Plasma Membrane |
| 445    | IPI00006052.3 | Cytoplasm       | 491    | IPI00219090.1 | Cytoplasm           | 537    | IPI00010270.1 | Cytoplasm       |
| 446    | IPI00332371.9 | Cytoplasm       | 492    | IPI00902466.1 | Cytoplasm           | 538    | IPI00643078.1 | Nucleus         |
| 447    | IPI00743142.2 | Cytoplasm       | 493    | IPI01014174.1 | Nucleus             | 539    | IPI00642213.1 | Nucleus         |
| 448    | IPI00639981.1 | Cytoplasm       | 494    | IPI01010344.1 | Nucleus             | 540    | IPI00879160.1 | Nucleus         |
| 449    | IPI00216691.5 | Cytoplasm       | 495    | IPI00003168.1 | unknown             | 541    | IPI00221325.3 | Nucleus         |
| 450    | IPI00795892.1 | unknown         | 496    | IPI01009918.1 | Extracellular Space | 542    | IPI00908754.1 | Cytoplasm       |
| 451    | IPI01012504.1 | Cytoplasm       | 497    | IPI00984586.1 | Extracellular Space | 543    | IPI00980330.1 | Plasma Membrane |
| 452    | IPI01011912.1 | Cytoplasm       | 498    | IPI00556640.1 | Extracellular Space | 544    | IPI00645329.1 | Nucleus         |
| 453    | IPI00922847.1 | Plasma Membrane | 499    | IPI00001734.3 | Cytoplasm           | 545    | IPI00220716.2 | Nucleus         |
| 454    | IPI00017334.1 | Nucleus         | 500    | IPI00299155.5 | Cytoplasm           | 546    | IPI00001757.1 | Nucleus         |
| 455    | IPI00922583.1 | Cytoplasm       | 501    | IPI00291922.2 | Cytoplasm           | 547    | IPI00939558.2 | Nucleus         |
| 456    | IPI00334907.3 | Cytoplasm       | 502    | IPI00218372.1 | Cytoplasm           | 548    | IPI00925570.1 | Cytoplasm       |
| 457    | IPI00479186.7 | Cytoplasm       | 503    | IPI00028004.2 | Cytoplasm           | 549    | IPI00465044.2 | Nucleus         |
| 458    | IPI00016736.1 | Cytoplasm       | 504    | IPI00479306.1 | Cytoplasm           | 550    | IPI00927827.1 | Nucleus         |
| 459    | IPI01011191.1 | Cytoplasm       | 505    | IPI00000811.2 | Cytoplasm           | 551    | IPI01018037.1 | Nucleus         |
| 460    | IPI01015748.1 | Cytoplasm       | 506    | IPI00003217.3 | Cytoplasm           | 552    | IPI00982162.1 | Plasma Membrane |

| Serial | Accession      | Location            | Serial | Accession      | Location        | Serial | Accession     | Location            |
|--------|----------------|---------------------|--------|----------------|-----------------|--------|---------------|---------------------|
| 553    | IPI00908327.1  | Extracellular Space | 599    | IPI00514399.1  | Cytoplasm       | 645    | IPI00878876.1 | Nucleus             |
| 554    | IPI00335589.5  | Cytoplasm           | 600    | IPI00746004.2  | Nucleus         | 646    | IPI00029266.1 | Nucleus             |
| 555    | IPI00020127.1  | Nucleus             | 601    | IPI00182289.6  | Cytoplasm       | 647    | IPI00216508.3 | Cytoplasm           |
| 556    | IPI00396329.1  | Nucleus             | 602    | IPI00011253.3  | Cytoplasm       | 648    | IPI01013434.1 | Cytoplasm           |
| 557    | IPI00554723.5  | Cytoplasm           | 603    | IPI00419880.6  | Cytoplasm       | 649    | IPI00216057.6 | Cytoplasm           |
| 558    | IPI00412579.6  | Nucleus             | 604    | IPI00217030.10 | Cytoplasm       | 650    | IPI00300299.6 | Cytoplasm           |
| 559    | IPI00746438.2  | Cytoplasm           | 605    | IPI00008433.4  | Cytoplasm       | 651    | IPI00946099.1 | Cytoplasm           |
| 560    | IPI00465361.4  | Cytoplasm           | 606    | IPI00021840.1  | Cytoplasm       | 652    | IPI00292020.3 | Cytoplasm           |
| 561    | IPI00304612.9  | Cytoplasm           | 607    | IPI01011967.1  | Cytoplasm       | 653    | IPI00980207.1 | Cytoplasm           |
| 562    | IPI00925058.1  | Cytoplasm           | 608    | IPI00893703.1  | Cytoplasm       | 654    | IPI00843996.1 | Nucleus             |
| 563    | IPI00413324.6  | Cytoplasm           | 609    | IPI00645201.1  | Cytoplasm       | 655    | IPI00646864.1 | Cytoplasm           |
| 564    | IPI00215719.6  | Cytoplasm           | 610    | IPI00221088.5  | Cytoplasm       | 656    | IPI00976464.1 | unknown             |
| 565    | IPI00026202.1  | Cytoplasm           | 611    | IPI00979136.1  | Nucleus         | 657    | IPI00013894.1 | Cytoplasm           |
| 566    | IPI00025329.1  | Cytoplasm           | 612    | IPI00940901.1  | Nucleus         | 658    | IPI00983309.1 | Plasma Membrane     |
| 567    | IPI00219153.4  | Nucleus             | 613    | IPI00011726.1  | Nucleus         | 659    | IPI00645380.1 | Cytoplasm           |
| 568    | IPI00010153.5  | Cytoplasm           | 614    | IPI00909332.2  | unknown         | 660    | IPI00297626.4 | Plasma Membrane     |
| 569    | IPI00021266.1  | Cytoplasm           | 615    | IPI00021187.4  | Nucleus         | 661    | IPI00514217.6 | Cytoplasm           |
| 570    | IPI00946221.1  | Cytoplasm           | 616    | IPI00009104.7  | Nucleus         | 662    | IPI00026970.4 | Nucleus             |
| 571    | IPI00977964.1  | Nucleus             | 617    | IPI01018318.1  | Nucleus         | 663    | IPI01010195.1 | Nucleus             |
| 572    | IPI00182533.5  | Cytoplasm           | 618    | IPI00220637.5  | Cytoplasm       | 664    | IPI00023344.2 | Cytoplasm           |
| 573    | IPI00651660.1  | Cytoplasm           | 619    | IPI00014458.1  | Cytoplasm       | 665    | IPI00402182.2 | Nucleus             |
| 574    | IPI00927458.1  | Cytoplasm           | 620    | IPI00479934.1  | Cytoplasm       | 666    | IPI00550363.3 | Cytoplasm           |
| 575    | IPI00926495.1  | Cytoplasm           | 621    | IPI00964725.1  | Cytoplasm       | 667    | IPI00744692.1 | Cytoplasm           |
| 576    | IPI00216237.5  | Cytoplasm           | 622    | IPI00294911.1  | Cytoplasm       | 668    | IPI00639819.1 | Nucleus             |
| 577    | IPI00896410.1  | Cytoplasm           | 623    | IPI00908375.1  | Cytoplasm       | 669    | IPI00329633.5 | Nucleus             |
| 578    | IPI00924813.1  | Cytoplasm           | 624    | IPI01015489.1  | Cytoplasm       | 670    | IPI00926756.1 | Cytoplasm           |
| 579    | IPI00215790.6  | Cytoplasm           | 625    | IPI00218922.5  | Cytoplasm       | 671    | IPI00981739.1 | Cytoplasm           |
| 580    | IPI00003918.6  | Cytoplasm           | 626    | IPI00030877.2  | Cytoplasm       | 672    | IPI00798211.1 | Cytoplasm           |
| 581    | IPI00640037.2  | Cytoplasm           | 627    | IPI00658162.2  | unknown         | 673    | IPI00982721.1 | Nucleus             |
| 582    | IPI00867533.1  | Cytoplasm           | 628    | IPI00784936.1  | Cytoplasm       | 674    | IPI00790648.2 | Extracellular Space |
| 583    | IPI00299573.12 | Cytoplasm           | 629    | IPI00470498.1  | Nucleus         | 675    | IPI00001589.1 | Cytoplasm           |
| 584    | IPI00012772.8  | Cytoplasm           | 630    | IPI00026089.4  | Nucleus         | 676    | IPI00219833.2 | Cytoplasm           |
| 585    | IPI00968128.1  | Cytoplasm           | 631    | IPI00032827.1  | Nucleus         | 677    | IPI00306516.1 | Cytoplasm           |
| 586    | IPI00008530.1  | Cytoplasm           | 632    | IPI00976190.1  | Nucleus         | 678    | IPI00641815.1 | unknown             |
| 587    | IPI00008527.3  | Cytoplasm           | 633    | IPI00300371.5  | Nucleus         | 679    | IPI00940673.1 | Cytoplasm           |
| 588    | IPI00025874.2  | Cytoplasm           | 634    | IPI00514669.1  | Nucleus         | 680    | IPI01014975.1 | Plasma Membrane     |
| 589    | IPI00641692.3  | Nucleus             | 635    | IPI00984053.1  | Cytoplasm       | 681    | IPI00028055.4 | Cytoplasm           |
| 590    | IPI00008438.1  | Cytoplasm           | 636    | IPI00789370.3  | Cytoplasm       | 682    | IPI00023542.6 | Cytoplasm           |
| 591    | IPI00025091.3  | Cytoplasm           | 637    | IPI00973884.1  | Nucleus         | 683    | IPI00967533.1 | Cytoplasm           |
| 592    | IPI00013917.3  | Cytoplasm           | 638    | IPI01009526.1  | Cytoplasm       | 684    | IPI00005087.1 | Cytoplasm           |
| 593    | IPI00221091.9  | Cytoplasm           | 639    | IPI00007188.6  | Cytoplasm       | 685    | IPI00395887.4 | Cytoplasm           |
| 594    | IPI00013485.3  | Cytoplasm           | 640    | IPI00291467.7  | Cytoplasm       | 686    | IPI00016676.1 | Cytoplasm           |
| 595    | IPI00218606.7  | Cytoplasm           | 641    | IPI00902652.1  | Plasma Membrane | 687    | IPI00376117.1 | Cytoplasm           |
| 596    | IPI00847986.1  | Cytoplasm           | 642    | IPI00328298.6  | Nucleus         | 688    | IPI01009016.1 | Nucleus             |
| 597    | IPI00012750.3  | Cytoplasm           | 643    | IPI00910438.1  | Nucleus         | 689    | IPI00642042.3 | Cytoplasm           |
| 598    | IPI00655650.2  | Cytoplasm           | 644    | IPI00385642.1  | Nucleus         | 690    | IPI00742682.2 | Nucleus             |

| Serial | Accession     | Location  | Serial | Accession     | Location        | Serial | Accession     | Location        |
|--------|---------------|-----------|--------|---------------|-----------------|--------|---------------|-----------------|
| 691    | IPI00979071.1 | Cytoplasm | 709    | IPI00645078.1 | Cytoplasm       | 727    | IPI01013843.1 | Cytoplasm       |
| 692    | IPI00646055.2 | Cytoplasm | 710    | IPI00375533.5 | Cytoplasm       | 728    | IPI00291175.7 | Plasma Membrane |
| 693    | IPI00643876.2 | Nucleus   | 711    | IPI00023647.4 | Cytoplasm       | 729    | IPI00022774.3 | Cytoplasm       |
| 694    | IPI00029629.4 | Cytoplasm | 712    | IPI01015565.1 | Cytoplasm       | 730    | IPI00910830.1 | Cytoplasm       |
| 695    | IPI00438230.3 | Nucleus   | 713    | IPI00032957.1 | Nucleus         | 731    | IPI00024145.2 | Cytoplasm       |
| 696    | IPI00965548.1 | Cytoplasm | 714    | IPI00909975.1 | Cytoplasm       | 732    | IPI00031804.1 | Cytoplasm       |
| 697    | IPI00946039.1 | Cytoplasm | 715    | IPI00022597.1 | Cytoplasm       | 733    | IPI00418471.6 | Cytoplasm       |
| 698    | IPI01014610.1 | unknown   | 716    | IPI00003949.1 | Cytoplasm       | 734    | IPI00298961.3 | Nucleus         |
| 699    | IPI00472176.1 | unknown   | 717    | IPI00783378.3 | unknown         | 735    | IPI00964692.1 | Nucleus         |
| 700    | IPI00885131.1 | unknown   | 718    | IPI01012867.1 | Cytoplasm       | 736    | IPI00220834.8 | Nucleus         |
| 701    | IPI00292894.5 | Nucleus   | 719    | IPI00514902.1 | Nucleus         | 737    | IPI00644712.4 | Nucleus         |
| 702    | IPI00000606.5 | unknown   | 720    | IPI00966258.1 | Cytoplasm       | 738    | IPI00788157.1 | Nucleus         |
| 703    | IPI00218343.4 | Cytoplasm | 721    | IPI00641843.3 | Cytoplasm       | 739    | IPI00909691.1 | Cytoplasm       |
| 704    | IPI00645452.1 | Cytoplasm | 722    | IPI00294495.5 | unknown         | 740    | IPI00000816.1 | Cytoplasm       |
| 705    | IPI00031370.3 | Cytoplasm | 723    | IPI00941385.2 | Cytoplasm       | 741    | IPI00018146.1 | Cytoplasm       |
| 706    | IPI00027107.5 | Cytoplasm | 724    | IPI00375145.1 | Cytoplasm       | 742    | IPI00021263.3 | Cytoplasm       |
| 707    | IPI00216298.6 | Cytoplasm | 725    | IPI01011924.1 | Nucleus         | 743    | IPI01010979.1 | Nucleus         |
| 708    | IPI00026328.3 | Cytoplasm | 726    | IPI00910004.1 | Plasma Membrane | 744    | IPI00062866.4 | unknown         |
|        |               |           |        |               |                 | 745    | IPI00477853.2 | Nucleus         |



**Table S8.** Analysis of EuHMT1 and EuHMT2 substrates by IPA (Ingenuity® Systems, [www.ingenuity.com](http://www.ingenuity.com)). The IPI (International Protein Index) accession numbers (common proteins present in Table S2-S5) were uploaded to search functions in Ingenuity database. Only statistically significant proteins (see *p*-values in the table below) were further considered for functional analysis.

---

**1. Cellular and Molecular Functions of EuHMT1 and EuHMT2 targets:**

| <b><u>Function name</u></b>           | <b><u>p-value</u></b> | <b><u># of proteins</u></b> |
|---------------------------------------|-----------------------|-----------------------------|
| Protein synthesis                     | 4.24E-25 – 7.97E-03   | 135                         |
| RNA Post-Transcriptional Modification | 1.49E-16 – 9.76E-03   | 54                          |
| Gene Expression                       | 5.48E-15 – 5.35E-03   | 155                         |
| Cell Death and Survival               | 9.33E-15 – 9.76E-03   | 276                         |
| Post-Translational Modification       | 3.35E-13 – 8.37E-03   | 64                          |

---

**2. Physiological Functions of EuHMT1 and EuHMT2 targets:**

| <b><u>Function name</u></b>   | <b><u>p-value</u></b> | <b><u># of proteins</u></b> |
|-------------------------------|-----------------------|-----------------------------|
| Embryonic Development         | 1.33E-06 – 9.76E-03   | 42                          |
| Organismal Development        | 1.33E-06 – 6.10E-03   | 149                         |
| Tissue Development            | 1.91E-05 – 9.76E-03   | 24                          |
| Connective Tissue Development | 3.87E-05 – 9.76E-03   | 81                          |
| Endocrine System Development  | 3.13E-04 – 3.13E-04   | 4                           |

---

### 3. References

- S1. Stecher H, et al. (2009) Biocatalytic Friedel-Crafts Alkylation Using Non-natural Cofactors. *Angew Chem Int Ed* 48:9546-9548.
- S2. Dalhoff C, Lukinavicius G, Klimasauskas S, Weinhold E (2006) Direct transfer of extended groups from synthetic cofactors by DNA methyltransferases. *Nat Chem Biol* 2:31-32.
- S3. Islam K, Zheng W, Yu H, Deng H, Luo M (2011) Expanding cofactor repertoire of protein lysine methyltransferase for substrate labeling. *ACS Chem Biol* 6:679-684.
- S4. Peters W, et al. (2010) Enzymatic site-specific functionalization of protein methyltransferase substrates with alkynes for click labeling. *Angew Chem Int Ed Eng* 49:5170-5173.
- S5. Chakraborty D, Islam K, Luo M (2012) Facile synthesis and altered ionization efficiency of diverse Nepsilon-alkyllysine-containing peptides. *Chem Commun* 48:1514-1516.
- S6. Islam K, et al. (2012) Bioorthogonal Profiling of Protein Methylation Using Azido Derivative of S-Adenosyl-l-methionine. *J Am Chem Soc* 134:5909-5915.
- S7. Wu H, et al. (2010) Structural Biology of Human H3K9 Methyltransferases. *PLoS One* 5:e8570.
- S8. Otwinowski Z, Borek D, Majewski W, Minor W (2003) Multiparametric scaling of diffraction intensities. *Acta Crystallogr A* 59:228-234.
- S9. Vagin A & Teplyakov A (2000) An approach to multi-copy search in molecular replacement. *Acta Crystallogr D Biol Crystallogr* 56:1622-1624.
- S10. Perrakis A, Harkiolaki M, Wilson KS, Lamzin VS (2001) ARP/wARP and molecular replacement. *Acta Crystallogr D Biol Crystallogr* 57(Pt 10):1445-1450.
- S11. Murshudov GN, Vagin AA, Dodson EJ (1997) Refinement of macromolecular structures by the maximum-likelihood method. *Acta Crystallogr D Biol Crystallogr* 53(Pt 3):240-255.
- S12. Emsley P, Cowtan K (2004) Coot: model-building tools for molecular graphics. *Acta Crystallogr D Biol Crystallogr* 60:2126-2132.
- S13. Bothwell IR, et al. (2012) Se-Adenosyl-l-selenomethionine Cofactor Analogue as a Reporter of Protein Methylation. *J Am Chem Soc* 134:14905-14912.
- S14. R. A. Laskowski MWM, D. S. Moss, J. M. Thornton (1993) PROCHECK: a program to check the stereochemical quality of protein structures. *J. Appl. Cryst.* 26:9.
